# Supplementary material for: Gold-catalyzed synthesis of nitrogen-containing heterocycles from ε-N-protected propargylic esters
Source: Royal Society of Chemistry journal article supplement (doi:10.1039/c003734f), 2010-01-01
Supplement: c003734f.pdf [file c003734f.pdf]

Supporting Information

**Gold-catalyzed synthesis of nitrogen-containing heterocycles from  
 $\epsilon$ -N-protected propargylic esters**

Jianfeng Huang,<sup>a</sup> Xuan Huang,<sup>a</sup> and Bo Liu<sup>\*ab</sup>

<sup>a</sup> Key Laboratory of Green Chemistry & Technology of Ministry of Education,  
College of Chemistry, Sichuan University, Chengdu 610064, P. R. China

<sup>b</sup> Key Laboratory of Synthetic Chemistry of Natural Substances, Shanghai Institute of  
Organic Chemistry, CAS, 345 Lingling Road, Shanghai 200032, P. R. China

|                                                                                              |     |
|----------------------------------------------------------------------------------------------|-----|
| <b>General Information</b> .....                                                             | S2  |
| <b>General procedure A: Preparation of propargylic esters 1d, 3a, 3b, 3d-f,<br/>3m</b> ..... | S2  |
| <b>General procedure B: Preparation of propargylic esters 3c, 3g-l</b> .....                 | S4  |
| <b>General procedure C: Au-catalyzed propargylic ester cyclization</b> .....                 | S5  |
| <b>Spectroscopic and Analytical Data</b> .....                                               | S5  |
| <b>References</b> .....                                                                      | S20 |
| <b>Copies of <sup>1</sup>H NMR and <sup>13</sup>C NMR of New Compounds</b> .....             | S20 |

## General Information

Ethyl acetate (AR grade) and Petroleum ether (60-90 °C, AR grade) were purified by distillation. Anhydrous tetrahydrofuran and diethyl ether were freshly distilled from sodium/benzophenone. Anhydrous acetonitrile was obtained by drying over anhydrous  $K_2CO_3$  for 24h, then over 3Å molecular sieves for 24h, followed by distillation. Other commercially available reagents were used without further purification.  $AuCl_3$  was purchased from Across Organics and  $AgOTf$  was purchased from Alfa Aesar. All manipulations of catalytic reactions were carried out under argon atmosphere. Reactions were monitored by thin layer chromatography (TLC). Flash column chromatography was performed over silica gel (300-400 mesh).  $^1H$  NMR and  $^{13}C$  NMR spectra were recorded on Bruker DMX-400 spectrometers using residue solvent peaks as an internal standard. Chemical shifts ( $\delta$ ) are quoted in parts per million (ppm) and coupling constants ( $J$ ) are measured in hertz (Hz). The following abbreviations are used to describe multiplicities: s = singlet, d = doublet, t = triplet, q = quartet, quin = quintuplet, br. = broad, m = multiplet.

## General procedure A: Preparation of propargylic esters 1d, 3a, 3b,

### 3d-f, 3m

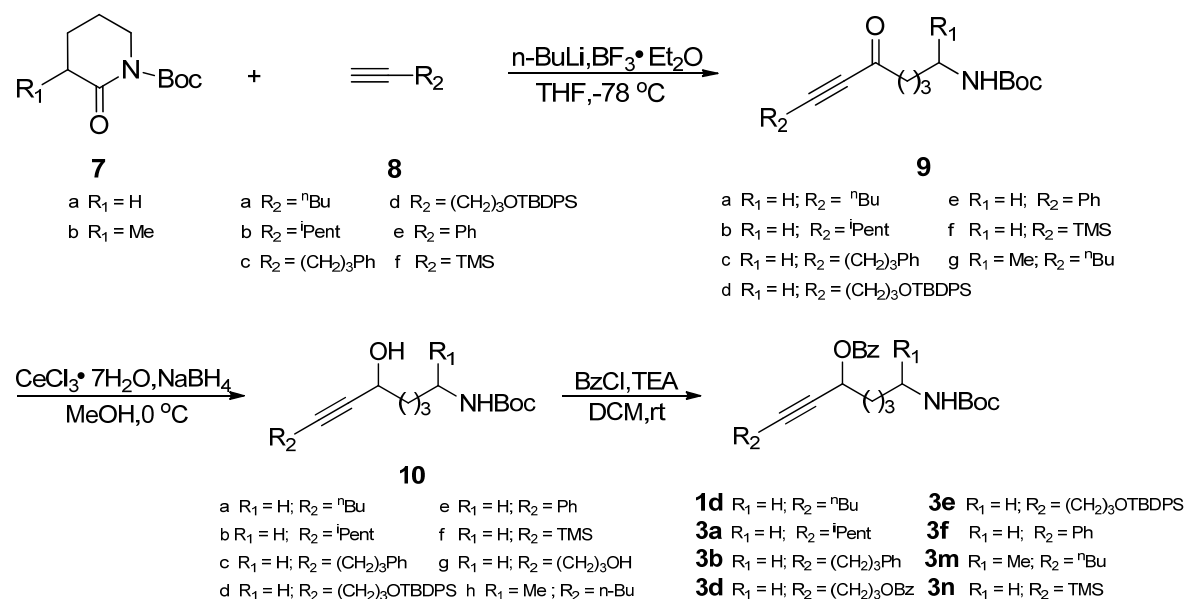

Compounds **7a** and **7b** were prepared according to the known procedure.<sup>1, 2, 3</sup>

### Synthesis of alkyne 9:

The compounds were prepared by using a modified procedure from F. G. West and co-workers.<sup>4</sup> To a solution of alkyne **8** (36.52 mmol) in dry THF (300.0 ml) at -78 °C, n-BuLi (14.0 ml, 2.84 M, 39.76 mmol) was slowly added, maintaining in argon atmosphere. The reaction mixture was stirred for 45 min, then BF<sub>3</sub>·Et<sub>2</sub>O (4.0 ml, 30.41 mmol) was added dropwise. Stirring was continued for 15 min, and then lactone **7** (30.41 mmol) was added in one portion via syringe. After stirring for 20 min, the reaction was gradually warmed to room temperature and a solution of saturated NH<sub>4</sub>Cl – NH<sub>3</sub> (aq) (2:1, 50 ml in total) was added to quench the reaction. The aqueous layer was extracted with Et<sub>2</sub>O (2×50 ml). The combined organic layers were washed with brine, dried with MgSO<sub>4</sub>, filtered and evaporated to afford the crude product as reddish-brown oil. The crude material was purified by flash chromatography on silica gel (PE/EtOAc 1:10) to provide alkyne **9**.

#### Synthesis of alkyne **10**:

To a solution of alkyne **9** (30.43 mmol) in MeOH (250 mL) was added CeCl<sub>3</sub>·7H<sub>2</sub>O (30.43 mmol) at 0 °C. The resulting mixture was stirred for 10 min before NaBH<sub>4</sub> (60.86 mmol) was added in portions. The resulting mixture was stirred for 20 min before MeOH was removed, then quenched with sat. aq. NaHCO<sub>3</sub> solution (200 mL) and stirred for 15 min. The aqueous layer was extracted with EtOAc (3 × 100 mL) and the combined organic layers were washed with brine, dried (Na<sub>2</sub>SO<sub>4</sub>), and concentrated *in vacuo*. Flash chromatography purification (silica gel, PE:EtOAc 1:4) afforded alkyne **10** as colorless oil.

#### Synthesis of propargylic alkyne **10g**:

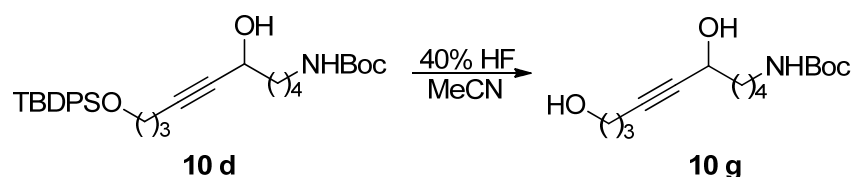

40% HF solution (1.3 mL, 29.4 mmol) was added to a solution of **10d** (1.5398 g, 2.94 mmol) in MeCN (26 mL) at 0 °C. The reaction mixture was stirred at room temperature for 24 h and poured into saturated aqueous NaHCO<sub>3</sub>. The aqueous layer was extracted with EtOAc. The combined organic layer was washed with brine, dried

over Na<sub>2</sub>SO<sub>4</sub> and concentrated in vacuo. Purification of the residue by SiO<sub>2</sub> column chromatography (EtOAc) gave **10g** (384.8 mg, 46%, not optimized) as colorless oil.

### Synthesis of propargylic esters:

A solution of alkynol **10** (2.08 mmol) in CH<sub>2</sub>Cl<sub>2</sub> (20.0 mL) was treated with Et<sub>3</sub>N (8.32 mmol) and BzCl (8.32 mmol) at 0 °C, and stirred for 1 h. The mixture was diluted with 100 ml CH<sub>2</sub>Cl<sub>2</sub> and washed with 10% NH<sub>3</sub> (aq.), brine, dried (Na<sub>2</sub>SO<sub>4</sub>), and chromatographed on silica gel eluting with EtOAc/PE (1:10 to 1:5) to give propargylic esters **1d**, **3a**, **3b**, **3d-f**, **3m-n**.

### General procedure B: Preparation of propargylic esters **3c**, **3g-l**

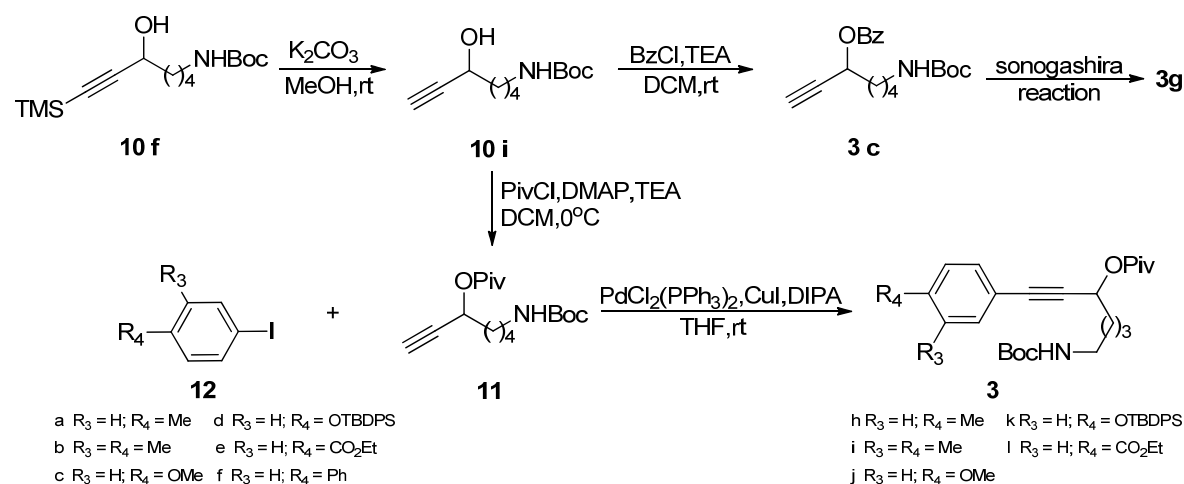

### Synthesis of alkynol **10i**:

A solution of **10f** (6.7301 g, 22.47 mmol) and K<sub>2</sub>CO<sub>3</sub> (9.8243 g, 67.45 mmol) in 200 mL of MeOH was stirred at room temperature for 30 min. After the solvent was removed, the residue was dissolved in 150 mL of sat. aqueous NH<sub>4</sub>Cl solution and then extracted with Et<sub>2</sub>O (3×100 ml), washed with brine and dried over MgSO<sub>4</sub>. Concentration of the solution gave **10i** as colorless oil.

**3c** was obtained by following a standard procedure of benzoylation. The residue was purified through a silica gel column eluting with EtOAc/PE = 1:10, gave colorless oil 4.2401 g, Yield for two steps: 56.9%.

### Synthesis of propargylic pivaloate **11**:

Alkynol **10i** (956.3 mg, 4.2 mmol) was dissolved in dry CH<sub>2</sub>Cl<sub>2</sub> (45 mL). Then TEA (6.2 mL, 42.0 mmol) and DMAP (167.5 mg, 1.28 mmol) were added, followed by the addition of pivaloyl chloride (1.1 mL, 8.4 mmol) at 0°C. The mixture was stirred for 1



h at room temperature, then treated with MeOH (5.0 mL), and stirred for 1 h. The aqueous phase was extracted with Et<sub>2</sub>O (2 × 50 mL). The combined Et<sub>2</sub>O layers were washed with saturated NaHCO<sub>3</sub> solution (25 mL), saturated NaCl solution, dried with anhydrous Na<sub>2</sub>SO<sub>4</sub>, filtered, and concentrated in vacuo. The residue was chromatographed (EtOAc/PE = 1:10) to provide pure propargylic acetate **11** (1.08 g, 83%) as colorless oil.

### Synthesis of propargylic esters **3g-l**:

Aryl iodide **12** (1.0 mmol), propargylic ester **11** (1.0 mmol), PdCl<sub>2</sub>(PPh<sub>3</sub>)<sub>2</sub> (0.05 mmol), and CuI (0.10 mmol) were dissolved in dry THF (10 mL), and then DIPA or TEA (2.0 mmol) was added. The mixture was stirred at room temperature for 1h and the solvent was removed, then 50ml of Et<sub>2</sub>O was added. The suspension was filtered through celite. The combined filtrate was concentrated under reduced pressure to give brown oil. The residue was purified through a silica gel column eluting with EtOAc/PE (1:10 to 1:5) to give propargylic esters **3h-l**.

**3g** was obtained by following a similar procedure as above via **3c**.

### General procedure C: Au-catalyzed propargylic ester cyclization

A mixture of AuCl<sub>3</sub> (5mol%, 3.0 mg) and AgOTf (15 mol%, 7.8 mg) in anhydrous MeCN (1.0 ml) was stirred under argon atmosphere at room temperature for 5 minutes. Then the substituted propargylic ester in anhydrous MeCN (1.0ml) was added. After the reaction completed (TLC control), TEA (0.1 ml) was added and the solvent was evaporated under reduced pressure. The crude mixture was purified by flash chromatography (silica gel).

### Spectroscopic and Analytical Data

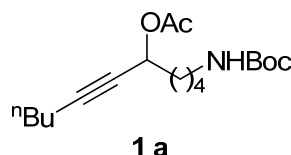

Compound **1a** was prepared according to the general procedure A: R<sub>f</sub> = 0.31 (PE/EtOAc, 5/1) colorless oil. <sup>1</sup>H NMR (400MHz, CDCl<sub>3</sub>): δ 5.34 - 5.30 (tt, J = 6.8 Hz, 2.0 Hz, 1H), 4.53 (*br.s*, 1H), 3.11 - 3.10 (t, J = 6.4 Hz, 2H), 2.20 - 2.16 (td, J =

6.8 Hz, 2.0 Hz, 2H), 2.04 (s, 3H), 1.74 - 1.68 (m, 2H), 1.48 - 1.32 (m, 8H), 1.42(s, 9H), 0.90 - 0.86 (t,  $J = 7.2$  Hz, 3H);  $^{13}\text{C}$  NMR (100MHz,  $\text{CDCl}_3$ ):  $\delta$  170.0, 156.0, 86.4, 79.1, 77.5, 64.4, 40.4, 34.8, 30.6, 29.7, 28.5, 22.3, 21.9, 21.1, 18.4, 13.6; IR (neat,  $\text{cm}^{-1}$ ): 3379, 2961, 2933, 2868, 2242, 1740, 1711, 1516, 1456, 1369.

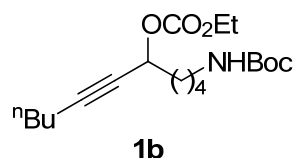

Compound **1b** was prepared according to the general procedure A:  $R_f = 0.31$  (PE/EtOAc, 5/1) colorless oil.  $^1\text{H}$  NMR (400MHz,  $\text{CDCl}_3$ ):  $\delta$  5.22 - 5.18 (tt,  $J = 6.4$  Hz, 2.0 Hz, 1H), 4.52 (*br.s*, 1H), 4.23 - 4.17 (q,  $J = 7.2$  Hz, 2H), 3.13 - 3.11 (m, 2H), 2.22 - 2.18 (td,  $J = 7.2$  Hz, 2.0 Hz, 2H), 1.81 - 1.75 (m, 2H), 1.43 (s, 9H), 1.51 - 1.37 (m, 8H), 1.33 - 1.29 (t,  $J = 6.8$  Hz, 3H), 0.91 - 0.88 (t,  $J = 3.2$  Hz, 3H);  $^{13}\text{C}$  NMR (100MHz,  $\text{CDCl}_3$ ):  $\delta$  156.0, 154.5, 87.3, 79.1, 76.9, 68.3, 64.1, 40.4, 34.8, 30.5, 29.6, 28.5, 22.3, 21.9, 18.4, 14.3, 13.6; IR (neat,  $\text{cm}^{-1}$ ): 3392, 2934, 2868, 2241, 1749, 1714, 1515, 1459, 1393, 1370.

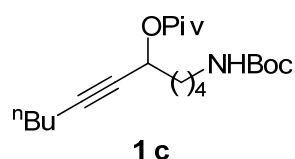

Compound **1c** was prepared according to the general procedure A:  $R_f = 0.38$  (PE/EtOAc, 5/1) colorless oil.  $^1\text{H}$  NMR (400MHz,  $\text{CDCl}_3$ ):  $\delta$  5.33 - 5.29 (tt,  $J = 6.4$  Hz, 1.6 Hz, 1H), 4.52 (*br.s*, 1H), 3.13 - 3.09 (q,  $J = 6.0$  Hz, 2H), 2.20 - 2.16 (td,  $J = 6.8$  Hz, 2.0 Hz, 2H), 1.76 - 1.70 (m, 2H), 1.54 - 1.33 (m, 8H), 1.43 (s, 9H), 1.20 (s, 9H), 0.91 - 0.87 (t,  $J = 7.2$  Hz, 3H);  $^{13}\text{C}$  NMR (100MHz,  $\text{CDCl}_3$ ):  $\delta$  177.5, 156.0, 85.9, 79.0, 77.7, 64.0, 40.4, 38.7, 34.7, 30.6, 29.6, 28.5, 27.1, 22.3, 21.9, 18.4, 13.6; IR (neat,  $\text{cm}^{-1}$ ): 3392, 2962, 2934, 2869, 2243, 1723, 1516, 1480, 1393, 1367.

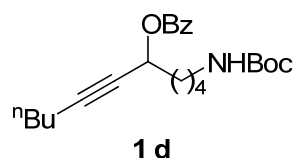

Compound **1d** was prepared according to the general procedure A:  $R_f = 0.33$  (PE/EtOAc, 5/1) colorless oil.  $^1\text{H}$  NMR (400MHz,  $\text{CDCl}_3$ ):  $\delta$  8.07 - 8.04 (dd,  $J = 7.2$  Hz, 1.6 Hz, 2H), 7.58 - 7.54 (t,  $J = 7.6$  Hz, 1H), 7.46 - 7.42 (t,  $J = 7.6$  Hz, 2H), 5.62 -

5.59 (tt,  $J = 6.4$  Hz, 2.0 Hz, 1H), 4.53 (*br.s*, 1H), 3.15 - 3.13 (m, 2H), 2.23 - 2.19 (td,  $J = 7.2$  Hz, 2.0 Hz, 2H), 1.91 - 1.85 (m, 2H), 1.55 - 1.34 (m, 8H), 1.43 (s, 9H), 0.91 - 0.88 (t,  $J = 3.2$  Hz, 3H);  $^{13}\text{C}$  NMR (100MHz,  $\text{CDCl}_3$ ):  $\delta$  165.7, 156.0, 133.1, 130.3, 129.8, 128.4, 86.7, 79.2, 77.5, 65.0, 40.5, 35.0, 30.7, 29.8, 28.5, 22.5, 22.0, 18.5, 13.7; IR (neat,  $\text{cm}^{-1}$ ): 3389, 2933, 2867, 2242, 1719, 1514, 1454, 1365.

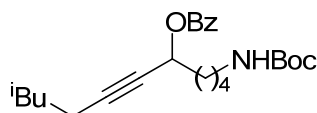

**3 a**

Compound **3a** was prepared according to the general procedure A:  $R_f = 0.63$  (PE/EtOAc, 5/1) colorless oil.  $^1\text{H}$  NMR (400MHz,  $\text{CDCl}_3$ ):  $\delta$  8.05 - 8.03 (m, 2H), 7.56 - 7.53 (m, 1H), 7.44 - 7.41 (m, 2H), 5.60 - 5.57 (t,  $J = 6.4$  Hz, 1H), 4.57 (*br.s*, 1H), 3.13 - 3.12 (m, 2H), 2.22 - 2.18 (td,  $J = 7.6$  Hz, 1.6 Hz, 2H), 1.89 - 1.84 (m, 2H), 1.67 - 1.59 (m, 1H), 1.54 - 1.52 (m, 4H), 1.42 (s, 9H), 1.40 - 1.36 (q,  $J = 7.2$  Hz, 2H), 0.87 - 0.86 (d,  $J = 6.8$  Hz, 6H);  $^{13}\text{C}$  NMR (100MHz,  $\text{CDCl}_3$ ):  $\delta$  165.5, 155.9, 132.9, 130.0, 129.6, 128.3, 86.5, 78.8, 77.3, 64.8, 40.3, 37.3, 34.8, 29.6, 28.3, 27.2, 22.3, 22.1, 16.7; IR (neat,  $\text{cm}^{-1}$ ): 3390, 3066, 2956, 2868, 2241, 1720, 1602, 1517, 1454, 1390, 1366.

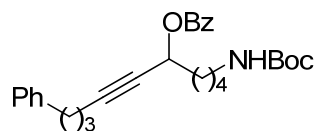

**3 b**

Compound **3b** was prepared according to the general procedure A:  $R_f = 0.49$  (PE/EtOAc, 5/1) colorless oil.  $^1\text{H}$  NMR (400MHz,  $\text{CDCl}_3$ ):  $\delta$  8.08 - 8.06 (d,  $J = 7.6$  Hz, 2H), 7.58 - 7.54 (t,  $J = 7.2$  Hz, 1H), 7.46 - 7.42 (m, 2H), 7.28 - 7.24 (m, 2H), 7.18 - 7.15 (m, 3H), 5.64 - 5.60 (*br.t*,  $J = 6.4$  Hz, 1H), 4.57 (*br.s*, 1H), 3.15 - 3.13 (m, 2H), 2.24 - 2.20 (td,  $J = 7.2$  Hz, 1.6 Hz, 2H), 2.71 - 2.68 (t,  $J = 7.2$  Hz, 2H), 1.92 - 1.89 (m, 2H), 1.86 - 1.80 (m, 2H), 1.57 - 1.54 (m, 4H), 1.43 (s, 9H).  $^{13}\text{C}$  NMR (100MHz,  $\text{CDCl}_3$ ):  $\delta$  165.7, 156.0, 141.5, 133.1, 130.2, 129.8, 128.6, 128.4(2C), 125.9, 86.1, 79.1, 78.2, 64.9, 40.5, 34.9, 34.8, 30.1, 29.7, 28.5, 22.5, 18.2; IR (neat,  $\text{cm}^{-1}$ ): 3393, 3063, 3008, 2936, 2864, 2240, 1718, 1602, 1512, 1453, 1392, 1366.

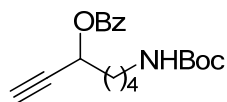

**3c**

Compound **3c** was prepared according to the general procedure B:  $R_f = 0.47$  (PE/EtOAc, 5/1) colorless oil. <sup>1</sup>H NMR (400MHz, CDCl<sub>3</sub>):  $\delta$  8.05 - 8.03 (m, 2H), 7.58 - 7.54 (m, 1H), 7.45 - 7.41 (t,  $J = 8.0$  Hz, 2H), 5.61 - 5.57 (td,  $J = 6.4$  Hz, 2.0 Hz, 1H), 4.57 (*br.s*, 1H), 3.13 (*br.s*, 2H), 2.49 - 2.48 (d,  $J = 2.0$  Hz, 1H), 1.96 - 1.90 (m, 2H), 1.57 - 1.54 (quin,  $J = 3.6$  Hz, 4H), 1.42 (s, 9H); <sup>13</sup>C NMR (100MHz, CDCl<sub>3</sub>):  $\delta$  165.6, 156.1, 133.3, 129.9, 129.8, 128.5, 81.1, 79.2, 74.0, 64.2, 40.4, 34.4, 29.7, 28.5, 22.3; IR (neat, cm<sup>-1</sup>): 3388, 3301, 3066, 2935, 2867, 2121, 1723, 1601, 1515, 1453, 1392, 1365.

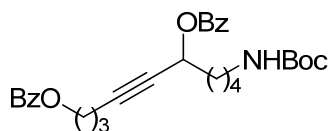

**3d**

Compound **3d** was prepared according to the general procedure A:  $R_f = 0.38$  (PE/EtOAc, 5/1) colorless oil. <sup>1</sup>H NMR (400MHz, CDCl<sub>3</sub>):  $\delta$  8.03 - 7.98 (m, 4H), 7.53 - 7.48 (m, 2H), 7.41 - 7.37 (m, 4H), 5.58 - 5.55 (*br.t*,  $J = 6.4$  Hz, 1H), 4.80 (*br.s*, 1H), 4.39 - 4.36 (t,  $J = 6.2$  Hz, 2H), 3.11 - 3.10 (m, 2H), 2.40 - 2.36 (td,  $J = 7.2$  Hz, 1.6 Hz, 2H), 1.98 - 1.91 (quin,  $J = 6.8$  Hz, 2H), 1.86 - 1.84 (m, 2H), 1.51 (*br.s*, 4H), 1.38(s, 9H); <sup>13</sup>C NMR (100MHz, CDCl<sub>3</sub>):  $\delta$  166.1, 165.2, 155.8, 132.8, 132.7, 129.9, 129.8, 129.4, 129.3, 128.1(2C), 84.6, 78.4, 78.2, 64.5, 63.2, 40.1, 34.5, 29.4, 28.1, 27.4, 22.1, 15.4; IR (neat, cm<sup>-1</sup>): 3395, 3066, 3012, 2936, 2866, 2244, 1717, 1602, 1512, 1452, 1366.

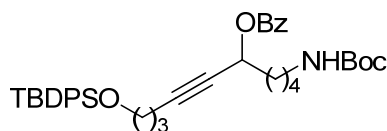

**3e**

Compound **3e** was prepared according to the general procedure A:  $R_f = 0.54$  (PE/EtOAc, 5/1) colorless oil. <sup>1</sup>H NMR (400MHz, CDCl<sub>3</sub>):  $\delta$  8.07 - 8.06 (d,  $J = 7.6$  Hz, 2H), 7.68 - 7.66 (m, 4H), 7.58 - 7.55 (t,  $J = 7.2$  Hz, 1H), 7.46 - 7.36 (m, 8H), 5.63 - 5.60 (*br.t*,  $J = 6.4$  Hz, 1H), 4.56 (*br.s*, 1H), 3.75 - 3.72 (t,  $J = 6.0$  Hz, 2H), 3.13 - 3.12 (m, 2H), 2.41 - 2.38 (m, 2H), 1.89 - 1.76 (m, 4H), 1.57 - 1.47 (m, 4H), 1.44 (s,

9H), 1.05 (s, 9H);  $^{13}\text{C}$  NMR (100MHz,  $\text{CDCl}_3$ ): 165.7, 156.0, 135.6, 133.9, 133.1, 130.2, 129.8, 129.7, 128.4, 127.7, 86.1, 79.1, 77.7, 64.9, 62.5, 40.5, 35.0, 31.5, 29.7, 28.5, 26.9, 22.5, 19.3, 15.4; IR (neat,  $\text{cm}^{-1}$ ): 3391, 3069, 2933, 2860, 2244, 1719, 1594, 1510, 1428, 1390, 1315.

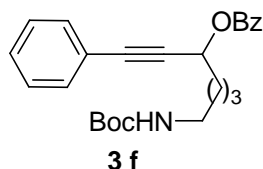

Compound **3f** was prepared according to the general procedure A:  $R_f = 0.29$  (PE/EtOAc, 5/1) white solid.  $^1\text{H}$  NMR (400MHz,  $\text{CDCl}_3$ ):  $\delta$  8.10 - 8.08 (m, 2H), 7.60 - 7.56 (t,  $J = 7.6$  Hz, 1H), 7.48 - 7.43 (m, 4H), 7.32 - 7.29 (m, 3H), 5.87 - 5.84 (t,  $J = 6.4$  Hz, 1H), 4.55 (*br.s*, 1H), 3.17 - 3.16 (m, 2H), 2.05 - 2.00 (m, 2H), 1.62 - 1.61 (m, 4H), 1.43 (s, 9H);  $^{13}\text{C}$  NMR (100MHz,  $\text{CDCl}_3$ ):  $\delta$  165.7, 156.1, 133.3, 132.0, 130.1, 129.9, 128.7, 128.5, 128.4, 122.4, 86.5, 85.7, 79.2, 65.0, 40.5, 34.8, 29.8, 28.5, 22.6; IR (neat,  $\text{cm}^{-1}$ ): 3142, 3060, 3003, 2975, 2937, 2864, 2230, 1722, 1695, 1600, 1516, 1491, 1367.

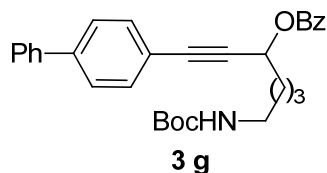

Compound **3g** was prepared according to the general procedure B:  $R_f = 0.57$  (PE/EtOAc, 5/1) colorless oil.  $^1\text{H}$  NMR (400MHz,  $\text{CDCl}_3$ ):  $\delta$  8.13 - 8.11 (d,  $J = 7.6$  Hz, 2H), 7.59 - 7.54 (m, 7H), 7.48 - 7.42 (m, 4H), 7.37 - 7.33 (m, 1H), 5.92 - 5.89 (t,  $J = 6.4$  Hz, 1H), 4.60 (*br.s*, 1H), 3.19 - 3.18 (m, 2H), 2.08 - 2.03 (m, 2H), 1.66 - 1.63 (m, 4H), 1.45 (s, 9H);  $^{13}\text{C}$  NMR (100MHz,  $\text{CDCl}_3$ ):  $\delta$  165.6, 156.1, 141.4, 140.2, 133.2, 132.4, 130.0, 129.9, 128.9, 128.5, 127.8, 127.0, 126.9, 121.2, 87.2, 85.6, , 79.0, 65.0, 40.4, 34.8, 29.8, 28.5, 22.5; IR (neat,  $\text{cm}^{-1}$ ): 3390, 3061, 2975, 2934, 2866, 2229, 1720, 1601, 1513, 1452, 1366.

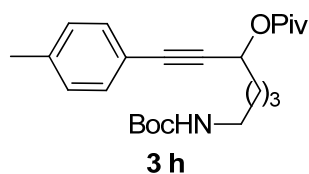

Compound **3h** was prepared according to the general procedure B:  $R_f = 0.50$  (PE/EtOAc, 5/1) colorless oil.  $^1\text{H}$  NMR (400MHz,  $\text{CDCl}_3$ ):  $\delta$  7.32 - 7.30 (d,  $J = 8.0$  Hz, 2H), 7.11 - 7.09 (d,  $J = 8.0$  Hz, 2H), 5.58 - 5.55 (t,  $J = 6.4$  Hz, 1H), 4.54 (*br.s*, 1H), 3.14 - 3.13 (*br.d*,  $J = 6.0$  Hz, 2H), 2.34 (s, 3H), 1.88 - 1.83 (q,  $J = 14.0$  Hz, 6.8 Hz, 2H), 1.54 - 1.51 (m, 4H), 1.43 (s, 9H), 1.22 (s, 9H);  $^{13}\text{C}$  NMR (100MHz,  $\text{CDCl}_3$ ):  $\delta$  177.6, 156.1, 138.8, 131.9, 129.1, 119.5, 86.0, 85.3, 79.3, 64.2, 40.5, 38.9, 34.7, 29.7, 28.6, 27.2, 22.5, 21.6; IR (neat,  $\text{cm}^{-1}$ ): 3393, 2975, 2869, 2229, 1727, 1511, 1457, 1393, 1366.

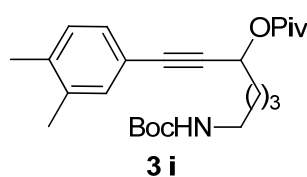

Compound **3i** was prepared according to the general procedure B:  $R_f = 0.59$  (PE/EtOAc, 5/1) colorless oil.  $^1\text{H}$  NMR (400MHz,  $\text{CDCl}_3$ ):  $\delta$  7.21 (*br.s*, 1H), 7.17 - 7.15 (d,  $J = 8.0$  Hz, 1H), 7.06 - 7.04 (d,  $J = 7.6$  Hz, 1H), 5.58 - 5.55 (t,  $J = 6.4$  Hz, 1H), 4.54 (*br.s*, 1H), 3.14 - 3.13 (m, 2H), 2.24 - 2.22 (d,  $J = 9.6$  Hz, 6H), 1.88 - 1.83 (m, 2H), 1.54 (*br.s*, 4H), 1.43 (s, 9H), 1.22 (s, 9H);  $^{13}\text{C}$  NMR (100MHz,  $\text{CDCl}_3$ ):  $\delta$  177.6, 156.1, 137.6, 136.7, 133.0, 129.6, 129.4, 119.7, 85.7, 85.5, 79.2, 64.2, 40.5, 38.9, 34.7, 29.7, 28.5, 27.2, 22.5, 19.9, 19.6; IR (neat,  $\text{cm}^{-1}$ ): 3392, 2974, 2869, 2230, 1721, 1506, 1480, 1455, 1393, 1366.

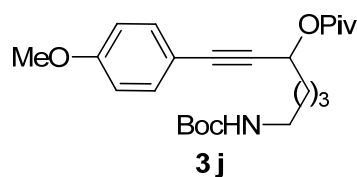

Compound **3j** was prepared according to the general procedure B:  $R_f = 0.52$  (PE/EtOAc, 5/1) colorless oil.  $^1\text{H}$  NMR (400MHz,  $\text{CDCl}_3$ ):  $\delta$  7.37 - 7.34 (m, 2H), 6.83 - 6.80 (m, 2H), 5.76 - 5.54 (t,  $J = 6.4$  Hz, 1H), 4.54 (*br.s*, 1H), 3.80 (s, 3H), 3.14 - 3.13 (m, 2H), 1.88 - 1.82 (m, 2H), 1.54 - 1.52 (m, 4H), 1.43 (s, 9H), 1.22 (s, 9H);  $^{13}\text{C}$  NMR (100MHz,  $\text{CDCl}_3$ ):  $\delta$  177.6, 159.9, 156.1, 133.5, 114.6, 114.0, 85.3, 85.1, 79.2, 64.3, 55.4, 40.5, 38.9, 34.7, 29.7, 28.5, 27.2, 22.5; IR (neat,  $\text{cm}^{-1}$ ): 3395, 2974, 2869, 2228, 1721, 1606, 1510, 1459, 1394, 1366.

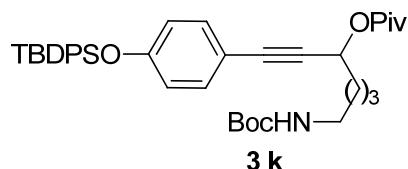

Compound **3k** was prepared according to the general procedure B:  $R_f = 0.55$  (PE/EtOAc, 5/1) colorless oil.  $^1\text{H}$  NMR (400MHz,  $\text{CDCl}_3$ ):  $\delta$  7.70 - 7.68 (m, 4H), 7.45 - 7.41 (m, 2H), 7.38 - 7.35 (m, 4H), 7.18 - 7.15 (d,  $J = 8.4$  Hz, 2H), 6.69 - 6.67 (d,  $J = 8.4$  Hz, 2H), 5.54 - 5.51 (t,  $J = 6.4$  Hz, 1H), 4.51 (*br.s*, 1H), 3.13 - 3.11 (m, 2H), 1.84 - 1.79 (m, 2H), 1.52 - 1.50 (m, 4H), 1.42 (s, 9H), 1.20 (s, 9H), 1.09 (s, 9H);  $^{13}\text{C}$  NMR (100MHz,  $\text{CDCl}_3$ ):  $\delta$  177.4, 156.0, 135.4, 133.2, 132.4, 130.1, 127.9, 119.8, 114.9, 85.3, 85.1, 79.0, 64.1, 40.4, 38.8, 34.6, 29.6, 28.4, 27.1, 26.5, 22.3, 19.4; IR (neat,  $\text{cm}^{-1}$ ): 3395, 3071, 3048, 2934, 2862, 2229, 1725, 1602, 1507, 1429, 1393, 1365.

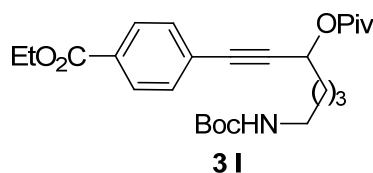

Compound **3l** was prepared according to the general procedure B:  $R_f = 0.47$  (PE/EtOAc, 5/1) colorless oil.  $^1\text{H}$  NMR (400MHz,  $\text{CDCl}_3$ ):  $\delta$  7.95 - 7.93 (d,  $J = 8.4$  Hz, 2H), 7.45 - 7.43 (d,  $J = 8.4$  Hz, 2H), 5.56 - 5.53 (t,  $J = 6.6$  Hz, 1H), 4.62 (*br.s*, 1H), 4.37 - 4.31 (q,  $J = 7.2$  Hz, 2H), 3.13 - 3.10 (t,  $J = 6.2$  Hz, 2H), 1.88 - 1.83 (m, 2H), 1.52 - 1.51 (m, 4H), 1.40 (s, 9H), 1.38 - 1.34 (t,  $J = 7.2$  Hz, 3H), 1.20 (s, 9H);  $^{13}\text{C}$  NMR (100MHz,  $\text{CDCl}_3$ ):  $\delta$  177.3, 165.9, 156.0, 131.7, 130.1, 129.3, 126.9, 89.5, 84.3, 78.9, 63.8, 61.1, 40.3, 38.8, 34.3, 29.6, 28.4, 27.0, 22.3, 14.3; IR (neat,  $\text{cm}^{-1}$ ): 3398, 2976, 2931, 2871, 2251, 1721, 1606, 1512, 1457, 1397, 1367.

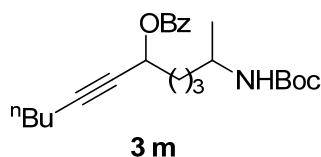

Compound **3m** was prepared according to the general procedure A:  $R_f = 0.59$  (PE/EtOAc, 5/1) colorless oil.  $^1\text{H}$  NMR (400MHz,  $\text{CDCl}_3$ ):  $\delta$  8.07 - 8.04 (m, 2H), 7.58 - 7.54 (m, 1H), 7.45 - 7.42 (m, 2H), 5.62 - 5.58 (m, 1H), 4.33 (*br.s*, 1H), 3.65

(*br.s*, 1H), 2.23 - 2.19 (td,  $J = 7.2$  Hz, 2.0 Hz, 2H), 1.93 - 1.82 (m, 2H), 1.57 - 1.36 (m, 8H), 1.42 (s, 9H), 1.13 - 1.10 (dd,  $J = 6.6$  Hz, 2.8 Hz, 3H), 0.91 - 0.88 (t,  $J = 7.2$  Hz, 3H);  $^{13}\text{C}$  NMR (100MHz,  $\text{CDCl}_3$ ):  $\delta$  165.7, 155.5, 133.1, 130.2, 129.8, 128.4, 86.6, 79.0, 77.5, 65.0, 46.4, 36.9, 35.1, 30.6, 28.5, 22.0, 21.8, 21.3, 18.5, 13.6; IR (neat,  $\text{cm}^{-1}$ ): 3382, 3066, 2934, 2868, 2241, 1720, 1602, 1515, 1454, 1366.

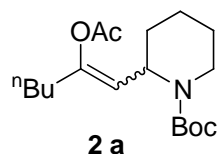

Compound **2a** was prepared in 84.3% yield according to the general procedure C:  $R_f = 0.51$  (PE/EtOAc, 5/1) colorless oil.  $^1\text{H}$  NMR (400MHz,  $\text{CDCl}_3$ ):  $\delta$  5.46 - 5.44 (d,  $J = 9.2$  Hz, 0.5H), 5.30 - 5.28 (d,  $J = 8.4$  Hz, 0.5H), 5.94 (*br.s*, 1H), 3.94 - 3.90 (m, 1H), 2.83 - 2.80 (m, 1H), 2.40 - 2.27 (m, 1 H), 2.21 - 2.19 (m, 1H), 2.17 (s, 1.5H), 2.14 (s, 1.5H), 1.61 - 1.55 (m, 4H), 1.43 (s, 4.5H), 1.44 (s, 4.5H), 1.43 - 1.28 (m, 6H), 0.90 - 0.87 (m, 3H);  $^{13}\text{C}$  NMR (100MHz,  $\text{CDCl}_3$ ):  $\delta$  major: 169.4, 154.7, 151.4, 115.4, 79.3, 47.7, 39.9, 33.2, 29.4, 28.7, 28.5, 25.6, 22.5, 21.0, 19.5, 13.9; minor : 169.0, 154.9, 149.7, 113.7, 79.5, 47.0, 39.8, 30.7, 30.0, 29.1, 28.6, 25.6, 22.1, 21.2, 19.8, 14.0; IR (neat,  $\text{cm}^{-1}$ ): 2933, 2865, 1757, 1693, 1454, 1413, 1367; HRMS ( $\text{ES}^+$ ) Calculated for  $[\text{C}_{18}\text{H}_{31}\text{NNaO}_4]^+$ : 348.2151; Found: 348.2147.

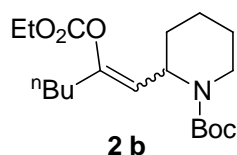

Compound **2b** was prepared in 71.7% yield according to the general procedure C:  $R_f = 0.54$  (PE/EtOAc, 5/1) colorless oil.  $^1\text{H}$  NMR (400MHz,  $\text{CDCl}_3$ ):  $\delta$  major: 5.59 - 5.56 (d,  $J = 9.2$  Hz, 0.75H), minor: 5.28 - 5.26 (d,  $J = 8.4$  Hz, 0.25H), 5.00 - 5.49 (m, 1H), 4.22 - 4.17 (q,  $J = 7.2$  Hz, 2H), 3.93 - 3.90 (m, 1H), 2.83 - 2.76 (m, 1H), major: 2.44 - 2.30 (m, 1.5H), minor: 2.25 - 2.21 (m, 0.5H), 1.59 - 1.42 (m, 4H), 1.43 (s, 9H), 1.43 - 1.32 (m, 6H), 1.33 - 1.29 (t,  $J = 7.2$  Hz, 3H), 0.89 - 0.85 (t,  $J = 7.2$  Hz, 3H);  $^{13}\text{C}$  NMR (100MHz,  $\text{CDCl}_3$ ):  $\delta$  major: 154.6, 153.5, 151.6, 115.2, 79.5, 64.3, 47.6, 39.7, 32.8, 30.6, 28.9, 28.5, 28.4, 25.5, 22.4, 19.5, 14.2; minor: 154.9, 152.8, 149.3, 114.0, 79.4, 64.3, 47.0, 39.7, 32.8, 30.0, 29.1, 28.7, 28.5, 25.5, 22.1, 19.8, 14.3; IR (neat,



cm<sup>-1</sup>): 2934, 2866, 1757, 1693, 1452, 1413, 1368; HRMS (ES<sup>+</sup>) Calculated for [C<sub>19</sub>H<sub>33</sub>NNaO<sub>5</sub>]<sup>+</sup>: 378.2256; Found: 378.2253.

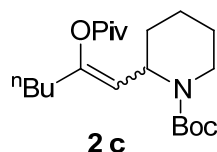

Compound **2c** was prepared in 83.1% yield according to the general procedure C: R<sub>f</sub> = 0.56 (PE/EtOAc, 5/1) colorless oil. <sup>1</sup>H NMR (400MHz, CDCl<sub>3</sub>): δ major: 5.41 - 5.39 (d, *J* = 8.8 Hz, 0.75H), minor: 5.27 - 5.24 (d, *J* = 8.4 Hz, 0.25H), 4.98 - 4.91 (*br.s*, 1H), 3.98 - 3.91 (m, 1H), 2.86 - 2.79 (m, 1H), major : 2.36 - 2.30 (m, 1.5H), minor: 2.21 - 2.17 (m, 0.5H), 1.61 - 1.55 (m, 4H), major : 1.44 (s, 5H), minor: 1.42 (s, 4H), 1.41 - 1.27 (m, 6H), major : 1.24 (s, 5H), minor: 1.26 (s, 4H), major : 0.90 - 0.88 (t, *J* = 3.6 Hz, 1.5H), minor: 0.88 - 0.86 (t, *J* = 3.6 Hz, 1.5H); <sup>13</sup>C NMR (100MHz, CDCl<sub>3</sub>): δ major: 177.0, 154.6, 151.5, 114.9, 79.5, 47.7, 39.8, 39.0, 32.8, 30.8, 29.0, 28.6, 27.3, 25.6, 22.5, 19.5, 14.1; minor: 176.3, 155.1, 149.3, 114.0, 79.4, 47.6, 39.9, 39.2, 32.8, 30.3, 29.2, 28.5, 27.2, 25.5, 22.1, 20.0, 13.9; IR (neat, cm<sup>-1</sup>): 2934, 2868, 1745, 1694, 1475, 1413, 1367; HRMS (ES<sup>+</sup>) Calculated for [C<sub>21</sub>H<sub>37</sub>NNaO<sub>4</sub>]<sup>+</sup>: 390.2620; Found: 390.2617.

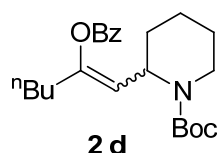

Compound **2d** was prepared in 91.8% yield according to the general procedure C: R<sub>f</sub> = 0.51 (PE/EtOAc, 5/1) colorless oil. <sup>1</sup>H NMR (400MHz, CDCl<sub>3</sub>): δ 8.10 - 8.06 (t, *J* = 8.0 Hz, 2H), 7.60 - 7.56 (t, *J* = 7.6 Hz, 1H), 7.48 - 7.44 (t, *J* = 7.6 Hz, 2H), major: 5.63 - 5.60 (d, *J* = 9.2 Hz, 0.6H), minor: 5.41 - 5.39 (d, *J* = 8.0 Hz, 0.4H), 5.07 - 5.00 (m, 1H), 3.99 - 3.95 (m, 1H), 2.90 - 2.83 (m, 1H), major: 2.54 - 2.41(m, 1.25H), minor: 2.34 - 2.32 (m, 0.75H), 1.65 - 1.58 (m, 4H), major: 1.48 (s, 5H), minor: 1.34 (s, 4H), 1.48 - 1.34(m, 6H), 0.92 - 0.86 (q, *J* = 7.2 Hz, 3H); <sup>13</sup>C NMR (100MHz, CDCl<sub>3</sub>): δ major: 165.2, 154.7, 151.6, 133.4, 130.0, 128.6, 115.6, 79.6, 47.6, 39.8, 33.2, 30.3, 29.5, 28.6, 28.4, 25.6, 22.6, 19.6, 14.1; minor: 164.5, 155.0, 149.7, 133.4, 130.2,

128.6, 114.5, 79.3, 47.8, 39.8, 33.2, 30.8, 29.1, 28.9, 28.6, 25.6, 22.2, 19.9, 14.0; IR (neat,  $\text{cm}^{-1}$ ): 2933, 2864, 1733, 1691, 1602, 1451, 1412, 1367; HRMS ( $\text{ES}^+$ ) Calculated for  $[\text{C}_{23}\text{H}_{33}\text{NNaO}_4]^+$ : 410.2307; Found: 410.2298.

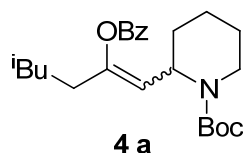

Compound **4a** was prepared in 83.2% yield according to the general procedure C:  $R_f$  = 0.77 (PE/EtOAc, 5/1) colorless oil.  $^1\text{H}$  NMR (400MHz,  $\text{CDCl}_3$ ):  $\delta$  8.10 - 8.06 (m, 2H), 7.60 - 7.56 (m, 1H), 7.47 - 7.43 (m, 2H), major: 5.60 - 5.58 (d,  $J$  = 8.8 Hz, 0.6H), minor: 5.41 - 5.39 (d,  $J$  = 8.0 Hz, 0.4H), 5.06 - 5.00 (m, 1H), 3.98 - 3.95 (m, 1H), 2.890 - 2.83 (m, 1H), major: 2.53 - 2.42(m, 1.2H), minor: 2.35 - 2.32 (m, 0.8H), 1.65 - 1.54 (m, 6H), major: 1.48 (s, 5H), minor: 1.33 (s, 4H), 1.40 - 1.34(m, 3H), 0.89 - 0.86 (m, 6H);  $^{13}\text{C}$  NMR (100MHz,  $\text{CDCl}_3$ ):  $\delta$  major: 165.1, 154.7, 151.8, 133.3, 130.1, 130.0, 128.6, 115.5, 79.3, 47.5, 39.9, 36.0, 31.5, 30.3, 28.6, 28.0, 27.8, 22.6, 19.6; minor: 164.4, 154.9, 150.0, 133.4, 130.2, 129.8, 128.6, 114.2, 79.6, 47.8, 39.9, 35.8, 31.5, 30.9, 28.4, 27.6, 25.6, 22.5, 19.9; IR (neat,  $\text{cm}^{-1}$ ): 3065, 2932, 2865, 1734, 1692, 1602, 1415, 1412, 1367; HRMS ( $\text{ES}^+$ ) Calculated for  $[\text{C}_{24}\text{H}_{35}\text{KNO}_4]^+$ : 440.2203; Found: 440.2206.

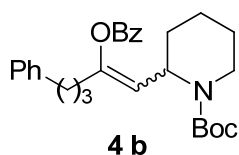

Compound **4b** was prepared in 85.3 % yield according to the general procedure C:  $R_f$  = 0.62 (PE/EtOAc, 5/1) colorless oil.  $^1\text{H}$  NMR (400MHz,  $\text{CDCl}_3$ ):  $\delta$  8.09 - 8.06 (m, 2H), 7.60 - 7.56 (m, 1H), 7.48 - 7.44 (m, 2H), 7.29 - 7.22 (m, 2H), 7.19 - 7.13 (m, 3H), major: 5.68 - 5.66 (d,  $J$  = 9.2 Hz, 0.6H) ,minor: 5.43 - 5.41 (d,  $J$  = 8.0 Hz, 0.4H), 5.06 (br.s, 1H), 4.00 - 3.96 (m, 1H), 2.91 - 2.83 (m, 1H), 2.68 - 2.64 (m, 2H), major: 2.60 - 2.57(m, 1.2H), minor: 2.41 - 2.37 (m, 0.8H), 1.85 - 1.82 (m, 3H), 1.66 - 1.35 (m, 5H), major: 1.49 (s, 5H), minor:1.35 (s, 4H);  $^{13}\text{C}$  NMR (100MHz,  $\text{CDCl}_3$ ):  $\delta$  major: 165.1, 154.6, 151.0, 141.8, 133.3, 130.1, 129.9, 128.5, 128.4(2C), 128.5, 116.1, 79.5, 47.6, 39.8, 35.6, 33.0, 30.2, 28.6, 28.4, 25.5, 19.5; minor: 164.3, 154.8, 149.1, 142.1,

133.4, 129.9, 129.7, 128.5(2C), 128.3, 125.9, 114.9, 79.3, 47.4, 39.8, 35.1, 30.7, 30.2, 28.7, 28.3, 25.5, 19.8; IR (neat,  $\text{cm}^{-1}$ ): 3063, 2034, 2935, 2860, 1732, 1689, 1602, 1451, 1412, 1366; HRMS ( $\text{ES}^+$ ) Calculated for  $[\text{C}_{28}\text{H}_{35}\text{KNO}_4]^+$ : 488.2203; Found: 488.2222.

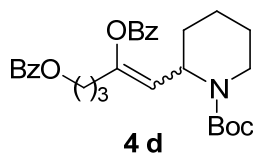

Compound **4d** was prepared in 55.4% yield according to the general procedure C:  $R_f$  = 0.59 and 0.50 (PE/EtOAc, 5/1) colorless oil.  $^1\text{H}$  NMR (400MHz,  $\text{CDCl}_3$ ):  $\delta$  8.10 - 8.00 (m, 4H), 7.60 - 7.50 (m, 2H), 7.47 - 7.37 (m, 4H), major: 5.72 - 5.69 (d,  $J$  = 9.6 Hz, 0.7H), minor: 5.49 - 5.47 (d,  $J$  = 8.0 Hz, 0.3H), 5.10 - 5.06 (m, 1H), 4.39 - 4.32 (m, 2H), 3.98 - 3.95 (*br.d*,  $J$  = 13.6 Hz, 1H), 2.89 - 2.83 (t,  $J$  = 13.2 Hz, 1H), 2.80 - 2.52 (m, 2H), 2.02 - 1.96 (m, 2H), 1.73 - 1.60 (m, 6H), 1.47 (s, 5H), 1.33 (s, 4H);  $^{13}\text{C}$  NMR (100MHz,  $\text{CDCl}_3$ ):  $\delta$  major: 166.6, 165.1, 154.7, 150.2, 133.5, 132.9, 130.2, 129.8, 129.6, 128.6, 128.4, 116.6, 79.7, 64.3, 47.6, 39.9, 30.6, 30.2, 28.6, 26.4, 26.1, 25.5, 19.5; minor: 166.6, 164.3, 154.8, 148.5, 133.5, 133.0, 130.3, 130.0, 129.5, 128.6, 128.4, 115.6, 79.4, 64.0, 47.6, 39.9, 30.6, 30.2, 28.4, 26.4, 26.1, 25.5, 19.9; IR (neat,  $\text{cm}^{-1}$ ): 3427, 3065, 2933, 2857, 1726, 1689, 1602, 1450, 1412, 1367; HRMS ( $\text{ES}^+$ ) Calculated for  $[\text{C}_{29}\text{H}_{36}\text{NO}_6]^+$ : 494.2543; Found: 494.2541.

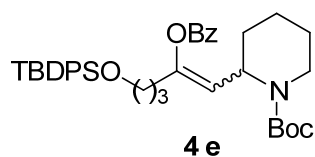

Compound **4e** was prepared in 77.3% yield according to the general procedure C:  $R_f$  = 0.66 (PE/EtOAc, 5/1) colorless oil.  $^1\text{H}$  NMR (400MHz,  $\text{CDCl}_3$ ):  $\delta$  8.10 - 8.05 (m, 2H), 7.66 - 7.58 (m, 5H), 7.48 - 7.46 (t,  $J$  = 7.6 Hz, 2H), 7.41 - 7.31 (m, 6H), major: 5.65 - 5.63 (d,  $J$  = 9.2 Hz, 0.6H), minor: 5.44 - 5.42 (d,  $J$  = 8.0 Hz, 0.4H), 5.99-5.96 (m, 1H), 5.04 (*br.s*, 1H), 3.73 - 3.68 (m, 2H), 2.88 - 2.85 (t,  $J$  = 12.0 Hz, 1H), major: 2.50 - 2.47(m, 1.4H), minor: 2.72 - 2.60 (m, 0.6H), 1.78 - 1.70 (m, 3H), 1.65 - 1.57 (m, 5H), major: 1.47 (s, 5H), minor: 1.34 (s, 4H), major: 1.04 (s, 5H), minor: 1.02 (s, 4H);  $^{13}\text{C}$  NMR (100MHz,  $\text{CDCl}_3$ ):  $\delta$  major: 165.1, 154.8, 149.3, 135.6, 134.0, 133.3, 130.0,

129.6, 128.6, 127.7, 115.9, 79.6, 63.4, 47.9, 39.8, 30.9, 30.2, 30.1, 28.6, 26.9, 26.2, 25.5, 19.6, 19.3; minor: 164.4, 154.8, 150.9, 135.6, 134.0, 133.4, 130.2, 129.7, 128.5, 127.7, 114.9, 79.3, 63.0, 47.5, 39.9, 30.9, 30.2, 29.9, 28.4, 27.0, 26.2, 25.6, 20.0, 19.3; IR (neat,  $\text{cm}^{-1}$ ): 3068, 2935, 2859, 1732, 1688, 1601, 1451, 1419, 1366; HRMS ( $\text{ES}^+$ ) Calculated for  $[\text{C}_{38}\text{H}_{49}\text{NaNO}_5\text{Si}]^+$ : 650.3278; Found: 650.3229.

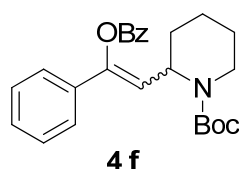

Compound **4f** was prepared in 49.9% yield according to the general procedure C:  $R_f = 0.47$  (PE/EtOAc, 5/1) colorless oil.  $^1\text{H}$  NMR (400MHz,  $\text{CDCl}_3$ ):  $\delta$  8.22 - 8.20 (d,  $J = 7.6$  Hz, 1H), 8.12 - 8.10 (d,  $J = 7.6$  Hz, 1H), 7.65 - 7.57 (m, 1H), 7.52 - 7.45 (m, 4H), 7.38 - 7.29 (m, 3H), 6.16 - 6.14 (d,  $J = 8.0$  Hz, 0.5H), 6.01 - 5.98 (d,  $J = 10.0$  Hz, 0.5H), 5.22 - 5.15 (m, 1 H), 4.07 - 3.99 (m, 1H), 2.98 - 2.90 (m, 1H), 1.82 - 1.78 (m, 2H), 1.69 - 1.67 (m, 3H), 1.51 - 1.36 (m, 1H), 1.35 (s, 4.5H), 1.24 (s, 4.5H);  $^{13}\text{C}$  NMR (100MHz,  $\text{CDCl}_3$ ):  $\delta$  major: 165.2, 154.9, 147.6, 134.3, 133.5, 130.1, 129.3, 128.7, 128.6, 128.2, 124.9, 115.9, 79.5, 48.4, 39.4, 31.0, 28.4, 25.5, 19.7; minor: 164.4, 154.9, 147.1, 134.9, 133.7, 130.4, 128.9, 129.3, 128.7, 128.5, 124.9, 117.1, 79.5, 48.2, 40.1, 30.2, 28.2, 25.6, 20.1; IR (neat,  $\text{cm}^{-1}$ ): 3061, 2974, 2933, 2857, 1737, 1689 1601, 1450, 1412, 1367; HRMS ( $\text{ES}^+$ ) Calculated for  $[\text{C}_{25}\text{H}_{29}\text{NNaO}_4]^+$ : 430.1994; Found: 430.1991.

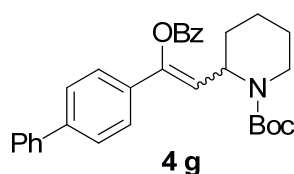

Compound **4g** was prepared in 53% yield according to the general procedure C:  $R_f = 0.69$  (PE/EtOAc, 5/1) colorless oil.  $^1\text{H}$  NMR (400MHz,  $\text{CDCl}_3$ ):  $\delta$  8.26 - 8.24 (d,  $J = 8.0$  Hz, 1H), 8.17 - 8.15 (d,  $J = 8.0$  Hz, 1H), 7.68 - 7.42 (m, 11H), 7.37 - 7.33 (m, 1H), 6.23 - 6.21 (dd,  $J = 8.0$  Hz, 1.6 Hz, 0.5H), 6.06 - 6.03 (dd,  $J = 10.0$  Hz, 1.6 Hz, 0.5H), 5.25 (br.s, 1 H), 4.10 - 4.026 (m, 1H), 3.05 - 2.93 (m, 1H), 1.87 - 1.70 (m, 5H), 1.50 - 1.46 (m, 1H), major: 1.38 (s, 5H), minor: 1.26 (s, 4H);  $^{13}\text{C}$  NMR (100MHz,  $\text{CDCl}_3$ ):

$\delta$  major: 165.4, 154.9, 147.4, 141.5, 140.6, 133.8, 133.6, 130.4, 129.4, 128.9, 128.7, 127.6, 127.4, 127.1, 125.3, 116.1, 79.6, 48.4, 40.2, 31.0, 28.5, 25.6, 20.0; minor: 164.5, 154.9, 146.9, 141.8, 140.7, 133.9, 133.3, 130.2, 129.8, 128.7, 128.6, 127.6, 127.3, 127.2, 125.3, 117.3, 79.6, 48.3, 39.4, 30.3, 28.3, 25.5, 19.8; IR (neat,  $\text{cm}^{-1}$ ): 3059, 3032, 2934, 2859, 1736, 1689, 1601, 1484, 1450, 1411, 1367; HRMS ( $\text{ES}^+$ ) Calculated for  $[\text{C}_{31}\text{H}_{33}\text{NNaO}_4]^+$ : 506.2307; Found: 506.2306.

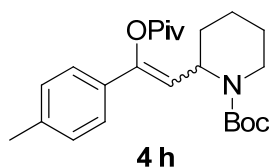

Compound **4h** was prepared in 64.2% yield according to the general procedure C:  $R_f$  = 0.67 (PE/EtOAc, 5/1) colorless oil.  $^1\text{H}$  NMR (400MHz,  $\text{CDCl}_3$ ):  $\delta$  7.27 - 7.25 (m, 2H), 7.16 - 7.12 (m, 2H), minor: 5.93 - 5.91 (d,  $J$  = 8.4 Hz, 0.34H), major: 5.75 - 5.73 (d,  $J$  = 10.0 Hz, 0.66H), 5.08 - 5.05 (*br.d*,  $J$  = 10.0 Hz, 1H), 4.05 - 3.95 (m, 1H), 2.97 - 2.86 (m, 1H), 2.33 (s, 3H), 1.73 - 1.36 (m, 6H), minor: 1.44 (s, 3H), major: 1.22 (s, 6H), minor: 1.36 (s, 3H), major: 1.24 (s, 6H);  $^{13}\text{C}$  NMR (100MHz,  $\text{CDCl}_3$ ):  $\delta$  major: 177.0, 154.9, 147.8, 138.6, 131.6, 129.0, 127.9, 114.8, 79.4, 48.3, 39.4, 38.8, 31.0, 28.2, 27.1, 25.5, 21.4, 19.7; minor: 176.1, 155.2, 146.9, 138.4, 132.6, 129.3, 124.7, 115.8, 79.6, 48.2, 40.0, 39.2, 30.2, 28.6, 27.3, 25.5, 21.3, 20.1; IR (neat,  $\text{cm}^{-1}$ ): 2975, 2935, 2862, 1745, 1686, 1512, 1477, 1412, 1366; HRMS ( $\text{ES}^+$ ) Calculated for  $[\text{C}_{24}\text{H}_{35}\text{NNaO}_4]^+$ : 424.2464; Found: 424.2458.

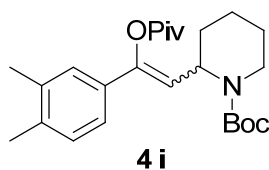

Compound **4i** was prepared in 75.3% yield according to the general procedure C:  $R_f$  = 0.73 (PE/EtOAc, 5/1) colorless oil.  $^1\text{H}$  NMR (400MHz,  $\text{CDCl}_3$ ):  $\delta$  7.16 - 7.08 (m, 3H), minor: 5.92 - 5.90 (d,  $J$  = 8.4 Hz, 0.34H), major: 5.73 - 5.71 (d,  $J$  = 10.0 Hz, 0.66H), 5.08 - 5.06 (m, 1 H), 4.05 - 3.95 (m, 1H), 2.98 - 2.87 (m, 1H), 2.24 - 2.23 (d,  $J$  = 3.6 Hz, 6H), 1.74 - 1.65 (m, 6H), minor: 1.44 (s, 4H), major: 1.21 (s, 5H), minor: 1.36 (s, 3H), major: 1.25 (s, 6H);  $^{13}\text{C}$  NMR (100MHz,  $\text{CDCl}_3$ ):  $\delta$  major: 177.1, 154.9, 148.0,

137.3, 136.4, 132.0, 129.6, 129.2, 125.6, 115.7, 79.4, 48.4, 39.3, 38.9, 31.0, 28.6, 27.3, 27.2, 20.0(2C), 19.7; minor: 176.1, 155.2, 147.0, 137.2, 136.8, 133.1, 129.9, 126.1, 122.2, 114.7, 79.6, 48.4, 40.1, 39.4, 30.3, 29.8, 28.2, 25.6, 20.2, 19.9, 19.7; IR (neat,  $\text{cm}^{-1}$ ): 3046, 2974, 2935, 2866, 1749, 1691, 1476, 1453, 1412, 1367; HRMS ( $\text{ES}^+$ ) Calculated for  $[\text{C}_{25}\text{H}_{37}\text{NNaO}_4]^+$ : 438.2620; Found: 438.2616.

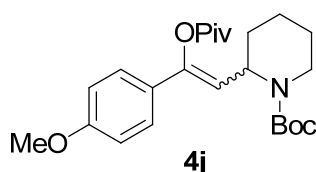

Compound **4j** was prepared in 61.3% yield according to the general procedure C:  $R_f$  = 0.66 (PE/EtOAc, 5/1) colorless oil.  $^1\text{H}$  NMR (400MHz,  $\text{CDCl}_3$ ):  $\delta$  7.32 - 7.29 (d,  $J$  = 8.8 Hz, 2H), 6.88 - 6.84 (m, 2H), major: 5.87 - 5.85 (d,  $J$  = 8.0 Hz, 0.6H) , minor: 5.71 - 5.69 (d,  $J$  = 10.0 Hz, 0.4H), 5.06 - 5.04 (m, 1 H), 4.05 - 3.94 (m, 1H), 3.79 (s, 3H), 2.97 - 2.86 (m, 1H), 1.72 - 1.60 (m, 6H), minor: 1.44 (s, 4H), major: 1.35 (s, 5H), 1.24 (s, 9H);  $^{13}\text{C}$  NMR (100MHz,  $\text{CDCl}_3$ ):  $\delta$  major: 176.1, 159.9, 155.1, 146.6, 128.0, 126.2, 114.0, 113.9, 74.9, 55.4, 48.4, 40.0, 39.2, 30.2, 28.6, 27.3, 25.5, 20.1; minor: 177.0, 159.8, 154.8, 147.5, 129.4, 127.0, 115.5, 113.8, 79.6, 55.3, 48.2, 39.4, 38.8, 31.0, 28.3, 27.1, 25.5, 19.7; IR (neat,  $\text{cm}^{-1}$ ): 3041, 2934, 2864, 2250, 1748, 1691, 1609, 1576, 1512, 1461, 1413, 1367; HRMS ( $\text{ES}^+$ ) Calculated for  $[\text{C}_{24}\text{H}_{35}\text{KNO}_5]^+(\text{NH}_4^+)$ : 659.3880; Found: 659.3881.

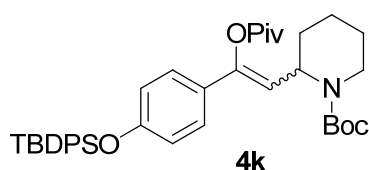

Compound **4k** was prepared in 65.1% yield according to the general procedure C:  $R_f$  = 0.69 (PE/EtOAc, 5/1) colorless oil.  $^1\text{H}$  NMR (400MHz,  $\text{CDCl}_3$ ):  $\delta$  7.73 - 7.71 (d,  $J$  = 6.8 Hz, 4H), 7.46 - 7.36 (m, 6H), 7.15 - 7.13 (d,  $J$  = 7.6 Hz, 2H), 6.76 - 6.72 (m, 2H), 5.86 - 5.984 (d,  $J$  = 8.4 Hz, 0.5H), 5.67 - 5.65 (d,  $J$  = 10.0 Hz, 0.5H) , 5.02 - 4.99 (m, 1H), 4.04 - 3.95 (m, 1H), 2.95 - 2.85 (m, 1H), 1.71 - 1.46 (m, 6H), 1.45 (s, 4.5H), 1.34 (s, 4.5H), 1.23 (s, 9H), 1.11 (s, 9H);  $^{13}\text{C}$  NMR (100MHz,  $\text{CDCl}_3$ ):  $\delta$  major: 176.1, 156.0, 146.5, 135.6, 132.8, 130.1, 128.1, 127.9, 125.9, 119.7, 113.8, 79.3, 48.5,

40.0, 39.2, 30.2, 28.6, 27.3, 26.6, 25.5, 20.1, 19.5; minor: 177.0, 155.0, 147.3, 135.6, 132.7, 130.1, 129.2, 127.9, 127.3, 119.5, 115.5, 79.6, 48.2, 39.3, 38.8, 31.0, 28.3, 27.1, 26.6, 25.4, 19.8, 19.5; IR (neat,  $\text{cm}^{-1}$ ): 3050, 2935, 2860, 1748, 1691, 1606, 1508, 1475, 1411, 1367; HRMS ( $\text{ES}^+$ ) Calculated for  $[\text{C}_{39}\text{H}_{55}\text{N}_2\text{O}_5\text{Si}]^+(\text{NH}_4^+)$ : 456.2152; Found: 456.2158.

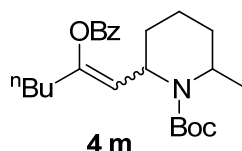

Compound **4m** was prepared in 90.9% yield according to the general procedure C:  $R_f = 0.71$  (PE/EtOAc, 5/1) colorless oil.  $^1\text{H}$  NMR (400MHz,  $\text{CDCl}_3$ ):  $\delta$  8.11 - 8.06 (m, 2H), 7.59 - 7.56 (m, 1H), 7.48 - 7.44 (m, 2H), 5.58 - 5.56 (d,  $J = 10.0$  Hz, 0.3H), 5.43 - 5.41 (d,  $J = 8.8$  Hz, 0.3H), 5.38 - 5.36 (d,  $J = 8.8$  Hz, 0.2 H), 5.24 - 5.22 (d,  $J = 8.0$  Hz, 0.2H), 5.00 - 4.91 (m, 0.5H), 4.65 - 4.57 (m, 0.5H), 4.37 - 4.28 (m, 0.5H), 4.05 - 3.98 (m, 0.5H), 2.61 - 2.41 (m, 1.2H), 2.34 - 2.30 (m, 0.8H), 1.96 - 1.16 (m, 19H), 1.17 - 1.16 (m, 3H), 0.91 - 0.86 (m, 3H);  $^{13}\text{C}$  NMR (100MHz,  $\text{CDCl}_3$ ):  $\delta$  165.2, 165.1, 164.6, 164.5, 155.5, 155.4, 155.2, 155.1, 150.7, 149.9, 148.5, 148.4, 133.3, 133.2, 130.2 (2C), 130.1 (2C), 130.0 (2C), 129.9, 129.8, 128.6, 128.5, 120.2, 119.6, 119.3, 118.9, 79.5 (2C), 79.2 (2C), 48.9, 48.2, 47.9, 47.6, 47.0, 46.9, 46.1, 45.9, 31.0, 30.2, 30.0, 29.3, 29.2 (2C), 29.1, 28.8 (2C), 28.6 (3C), 28.5, 28.1, 27.8, 27.3, 22.6 (2C), 22.2, 22.1, 20.9, 20.6, 20.5 (2C), 15.7, 15.2, 14.9, 14.6, 14.1, 14.0, 13.9 (2C); IR (neat,  $\text{cm}^{-1}$ ): 3065, 2935, 2869, 1733, 1689, 1602, 1455, 1367; HRMS ( $\text{ES}^+$ ) Calculated for  $[\text{C}_{24}\text{H}_{35}\text{KNO}_4]^+$ : 440.2203; Found: 440.2268.

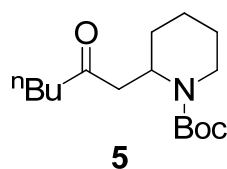

Compound **5** was prepared in 83.7% yield.  $R_f = 0.49$  (PE/EtOAc, 5/1) colorless oil.  $^1\text{H}$  NMR (400MHz,  $\text{CDCl}_3$ ):  $\delta$  4.69 - 4.68 (m, 1H), 3.97 - 3.94 (m, 1H), 2.79 - 2.73 (m, 1H), 2.63 - 2.59 (m, 2H), 2.47 - 2.41 (m, 2H), 1.62 - 1.24 (m, 10H), 1.43 (s, 9H), 0.90 - 0.87 (t,  $J = 7.2$  Hz, 3H);  $^{13}\text{C}$  NMR (100MHz,  $\text{CDCl}_3$ ):  $\delta$  209.4, 154.8, 79.6, 47.4, 43.3, 42.7, 39.5, 28.5, 28.4, 25.9, 25.4, 22.4, 19.0, 13.9; IR (neat,  $\text{cm}^{-1}$ ): 2934,

2866, 1690, 1452, 1411, 1368; HRMS (ES<sup>+</sup>) Calculated for [C<sub>16</sub>H<sub>29</sub>NNaO<sub>3</sub>]<sup>+</sup>: 306.2045; Found: 306.2051.

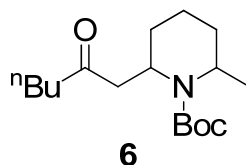

Compound **6** was prepared in 82.6% yield. R<sub>f</sub> = 0.43 (PE/EtOAc, 10/1) colorless oil. <sup>1</sup>H NMR (400MHz, CDCl<sub>3</sub>): δ 4.56 - 4.53 (m, 0.5H), 4.28 - 4.24 (m, 0.5H), 4.24 - 4.19 (m, 0.5H), 4.05 - 3.97 (m, 0.5H), 2.85 - 2.49 (m, 2H), 2.45 - 2.39 (m, 2H), 1.83 - 1.77 (m, 2H), 1.61 - 1.49 (m, 6H), 1.44 - 1.43 (d, J = 1.6 Hz, 9H), 1.32 - 1.26 (m, 2H), 1.22 - 1.20 (d, J = 6.8 Hz, 1.5H), 1.14 - 1.12 (d, J = 6.8 Hz, 1.5H), 0.91 - 0.86 (td, J = 7.2 Hz, 2.0 Hz, 3H); <sup>13</sup>C NMR (100MHz, CDCl<sub>3</sub>): δ major: 209.5, 155.0, 79.4, 47.6, 47.5, 46.2, 42.7, 29.9, 28.5, 27.9, 25.9, 22.3, 20.1, 14.1, 13.8; minor: 209.3, 154.9, 79.2, 47.6, 47.4, 45.6, 42.6, 28.5, 27.9, 25.0, 25.8, 22.3, 20.3, 14.1, 13.7; IR (neat, cm<sup>-1</sup>): 2936, 2872, 1688, 1460, 1391, 1369; HRMS (ES<sup>+</sup>) Calculated for [C<sub>17</sub>H<sub>31</sub>NNaO<sub>3</sub>]<sup>+</sup>: 320.2202; Found: 320.2209.

## Reference:

- [1] J.-J. Zhang and Y.-Q. Li, *Chinese Journal of Pharmaceuticals*, 2004, **35**, 395.
- [2] G. A. Lawrance, M. Maeder, M. J. Robertson and Sutrisno, *Transition Metal Chemistry*, 2004, **29**, 505.
- [3] T. J. Harrison and G. R. Dake, *J. Org. Chem.*, 2005, **70**, 10872.
- [4] T. N. Grant, C. L. Benson and F. G. West, *Org. Lett.*, 2008, **10**, 3985.

**Copies of <sup>1</sup>H NMR and <sup>13</sup>CNMR of Compounds**



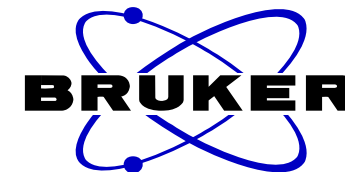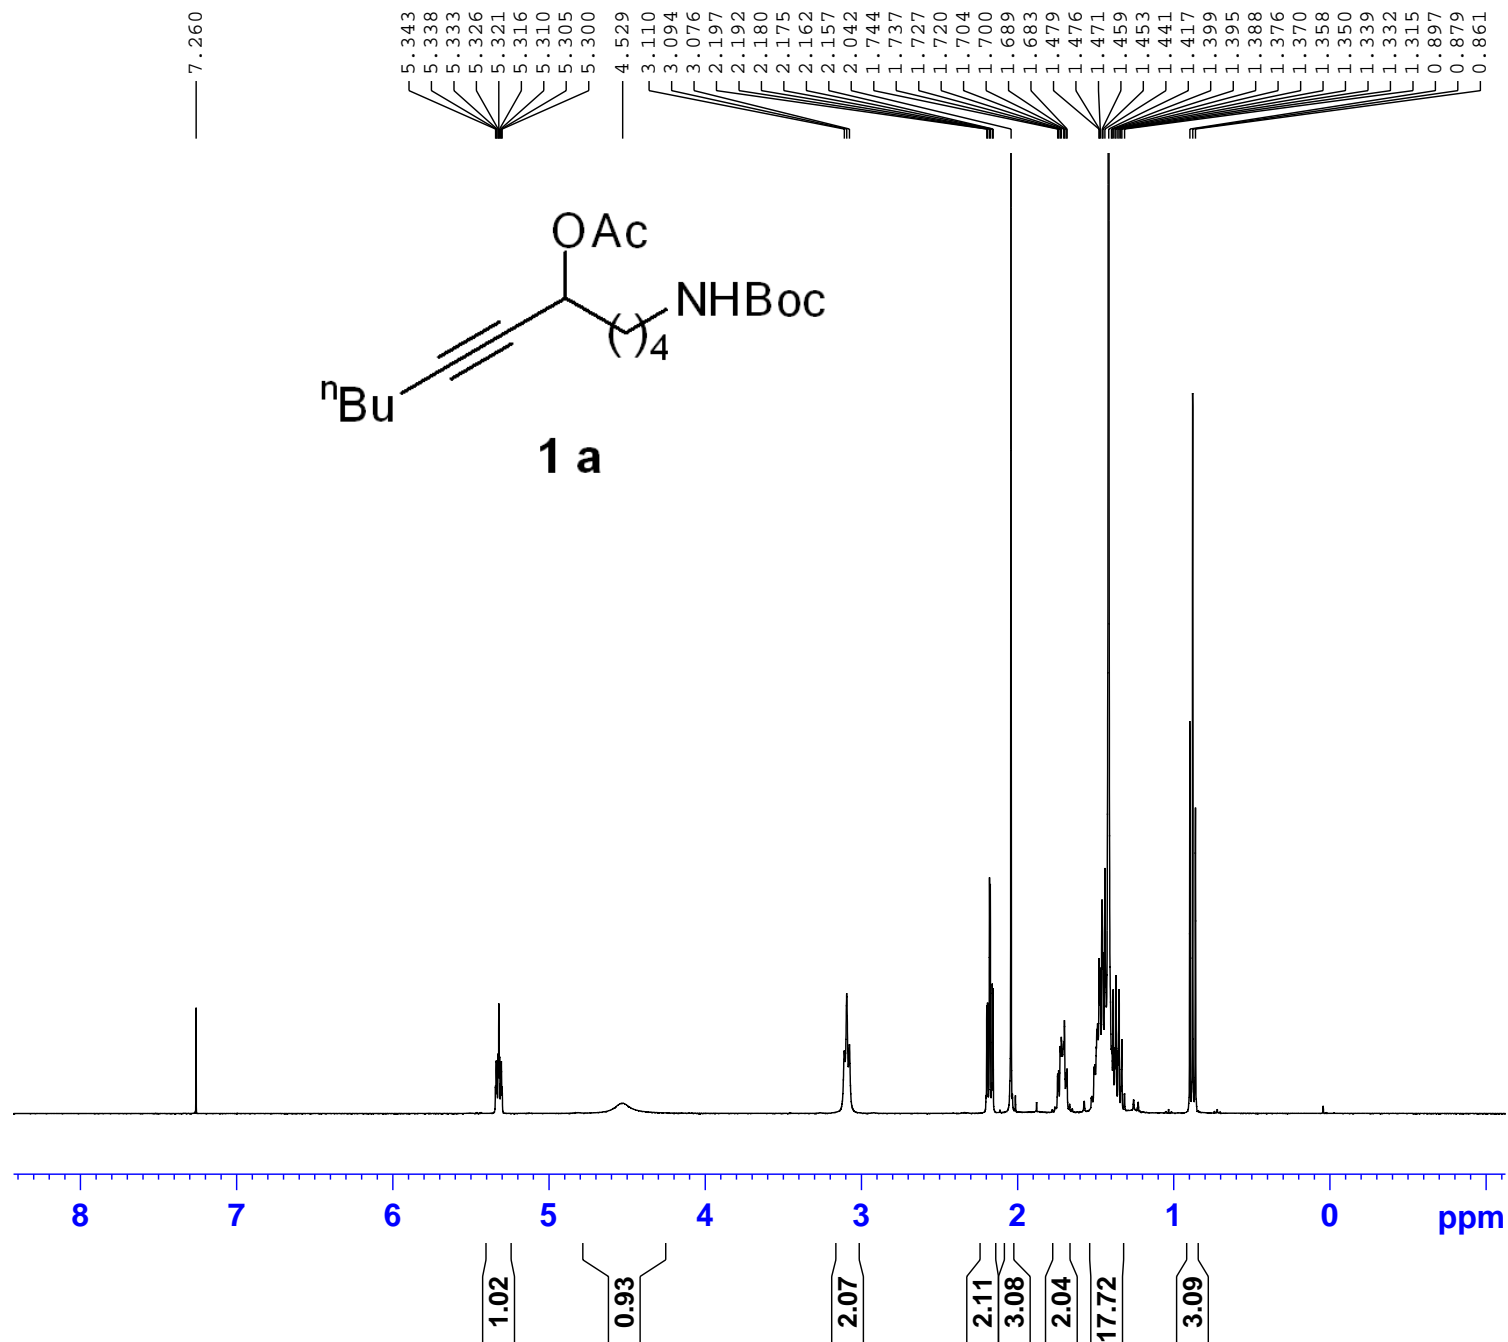

Current Data Parameters  
 NAME Dec03-2008 HJF 1-114  
 EXPNO 14  
 PROCNO 1

F2 - Acquisition Parameters  
 Date\_ 20081203  
 Time 20.35  
 INSTRUM spect  
 PROBHD 5 mm PABBO BB-  
 PULPROG zg30  
 TD 65536  
 SOLVENT CDCl3  
 NS 16  
 DS 0  
 SWH 8223.685 Hz  
 FIDRES 0.125483 Hz  
 AQ 3.9846387 sec  
 RG 64  
 DW 60.800 usec  
 DE 6.50 usec  
 TE 295.6 K  
 D1 1.00000000 sec  
 TD0 1

==== CHANNEL f1 =====  
 NUC1 1H  
 P1 12.00 usec  
 PL1 -2.00 dB  
 SFO1 400.1324710 MHz

F2 - Processing parameters  
 SI 32768  
 SF 400.130092 MHz  
 WDW GM  
 SSB 0  
 LB -0.30 Hz  
 GB 0.1  
 PC 1.00

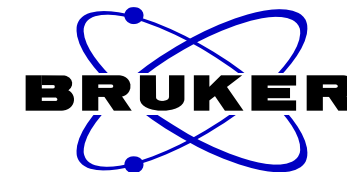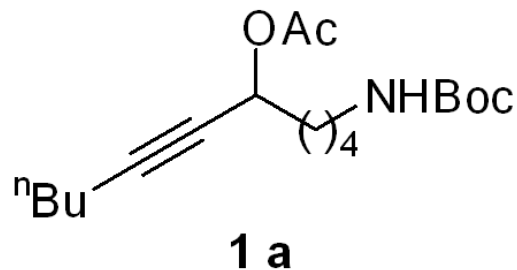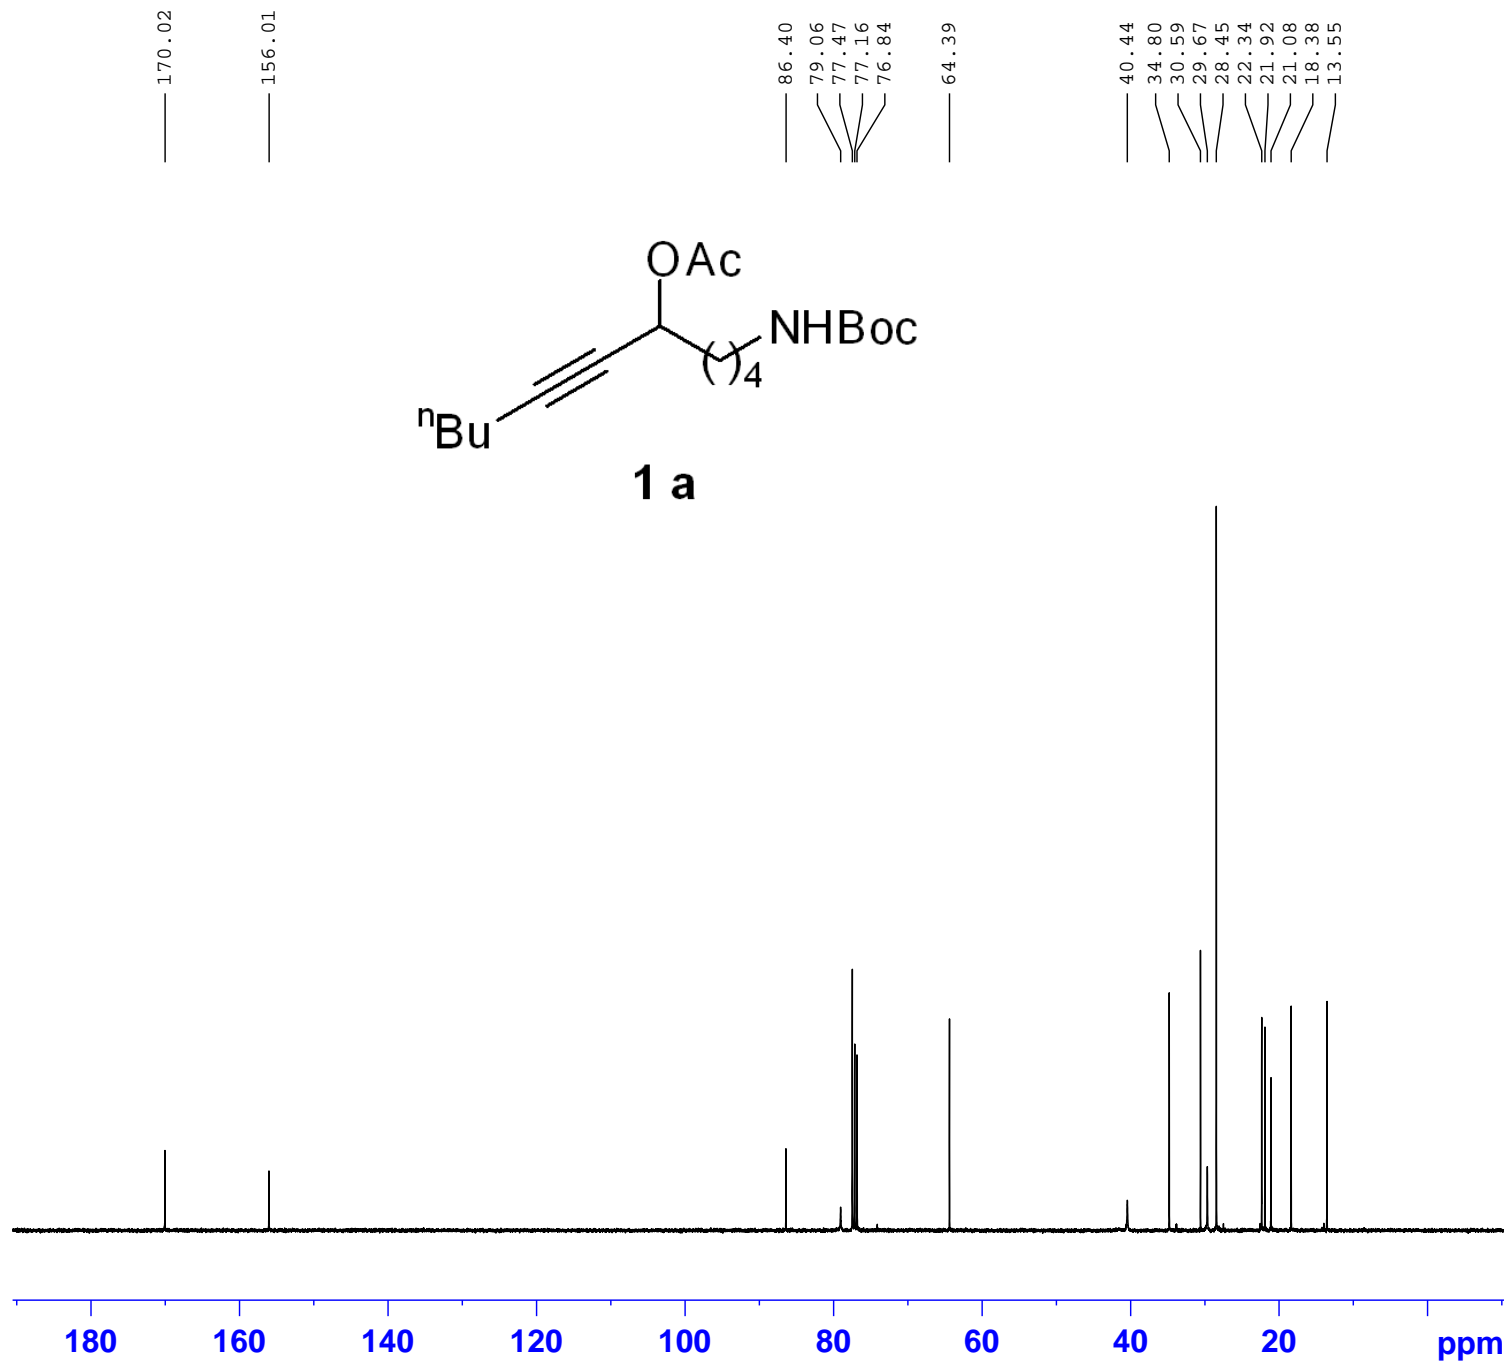

Current Data Parameters  
 NAME 2009-07-06 HJF1-114  
 EXPNO 1  
 PROCNO 1

F2 - Acquisition Parameters  
 Date\_ 20090707  
 Time 3.54  
 INSTRUM spect  
 PROBHD 5 mm PABBO BB-  
 PULPROG zgpg30  
 TD 65536  
 SOLVENT CDCl3  
 NS 512  
 DS 0  
 SWH 24038.461 Hz  
 FIDRES 0.366798 Hz  
 AQ 1.3631988 sec  
 RG 181  
 DW 20.800 usec  
 DE 6.50 usec  
 TE 299.3 K  
 D1 2.0000000 sec  
 d11 0.0300000 sec  
 DELTA 1.89999998 sec  
 TD0 1

==== CHANNEL f1 =====  
 NUC1 13C  
 P1 15.50 usec  
 PL1 -1.00 dB  
 SFO1 100.6228298 MHz

==== CHANNEL f2 =====  
 CPDPRG2 waltz16  
 NUC2 1H  
 PCPD2 60.00 usec  
 PL12 11.35 dB  
 PL13 13.05 dB  
 PL2 -2.00 dB  
 SFO2 400.1316005 MHz

F2 - Processing parameters  
 SI 32768  
 SF 100.6127592 MHz  
 WDW EM  
 SSB 0  
 LB 0.60 Hz  
 GB 0  
 PC 1.40

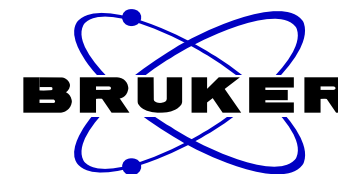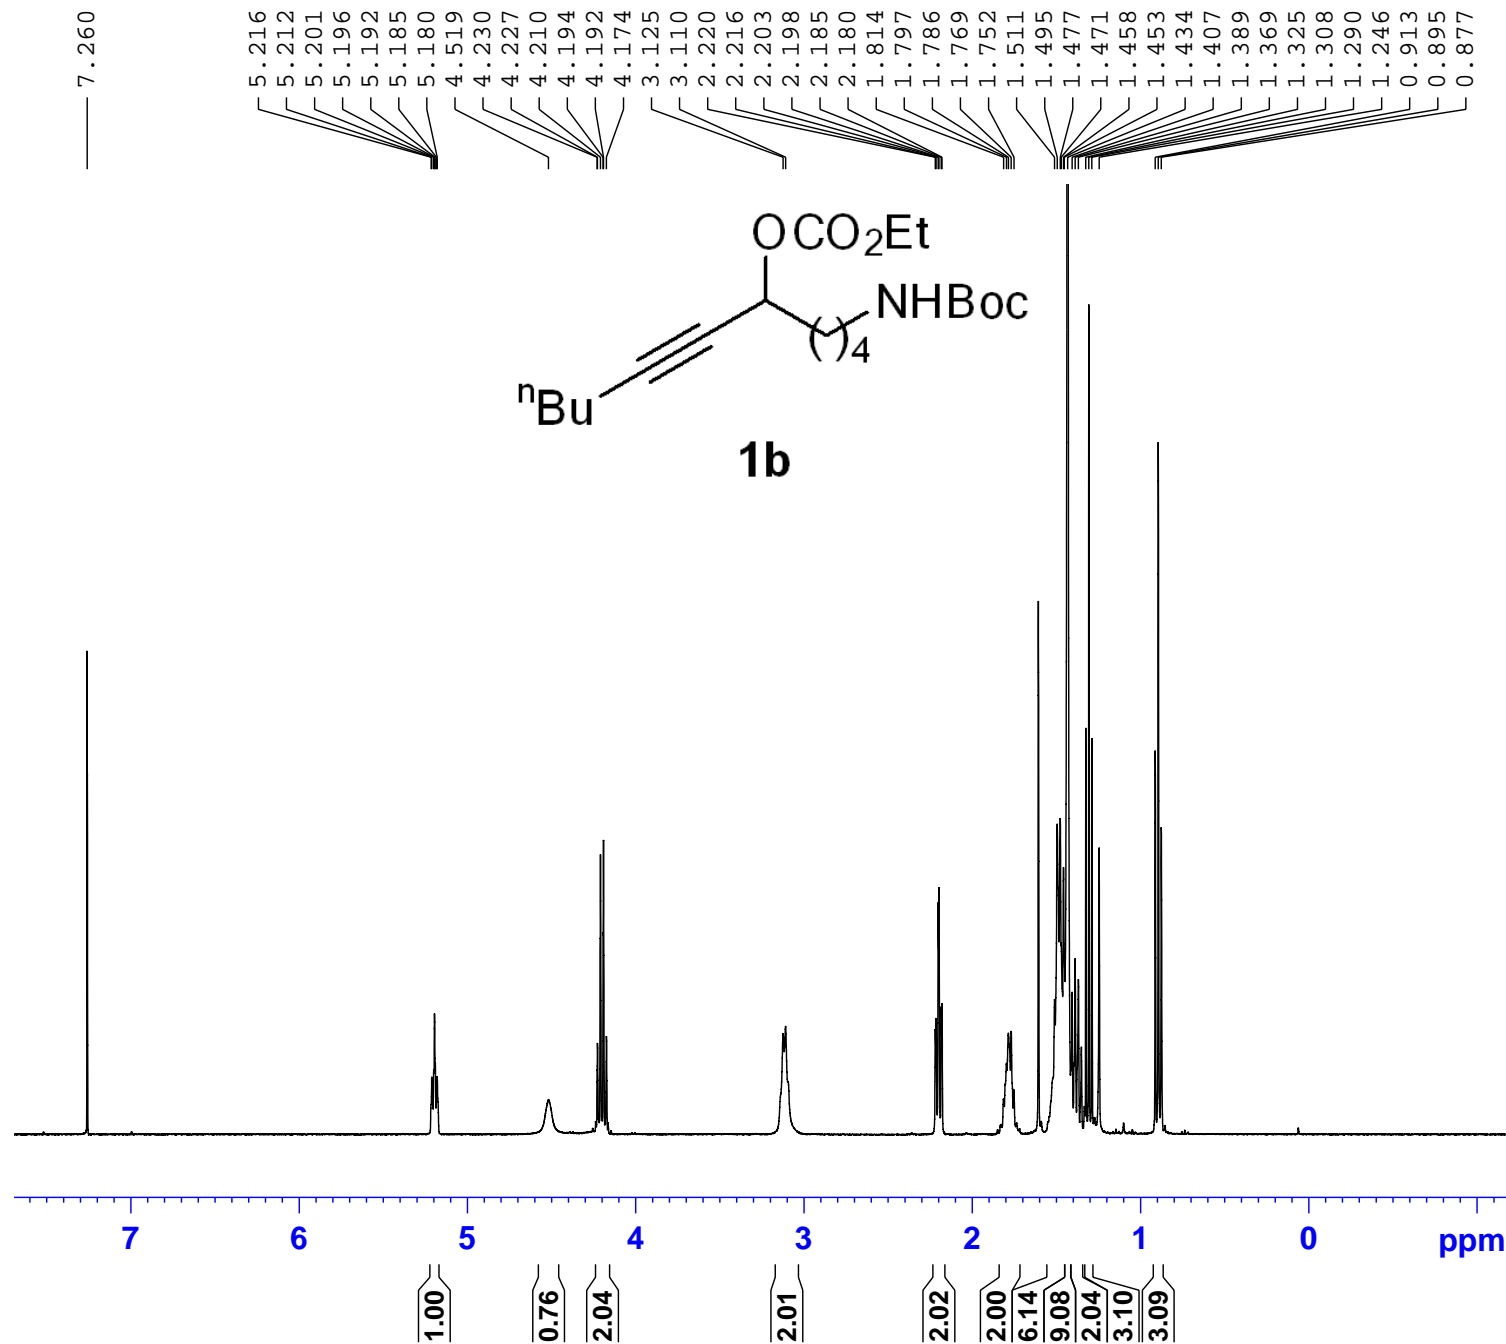

Current Data Parameters  
 NAME Jun22-2009 HJF 3-121  
 EXPNO 7  
 PROCNO 1

F2 - Acquisition Parameters  
 Date\_ 20090623  
 Time 1.47  
 INSTRUM spect  
 PROBHD 5 mm PABBO BB-  
 PULPROG zg30  
 TD 65536  
 SOLVENT CDC13  
 NS 16  
 DS 0  
 SWH 8223.685 Hz  
 FIDRES 0.125483 Hz  
 AQ 3.9846387 sec  
 RG 161  
 DW 60.800 usec  
 DE 6.50 usec  
 TE 295.9 K  
 D1 1.0000000 sec  
 TD0 1

===== CHANNEL f1 =====  
 NUC1 1H  
 P1 12.00 usec  
 PL1 -2.00 dB  
 SFO1 400.1324710 MHz

F2 - Processing parameters  
 SI 32768  
 SF 400.1300098 MHz  
 WDW GM  
 SSB 0  
 LB -0.20 Hz  
 GB 0.1  
 PC 1.00

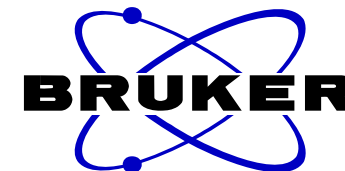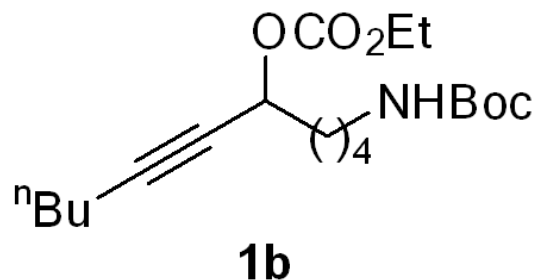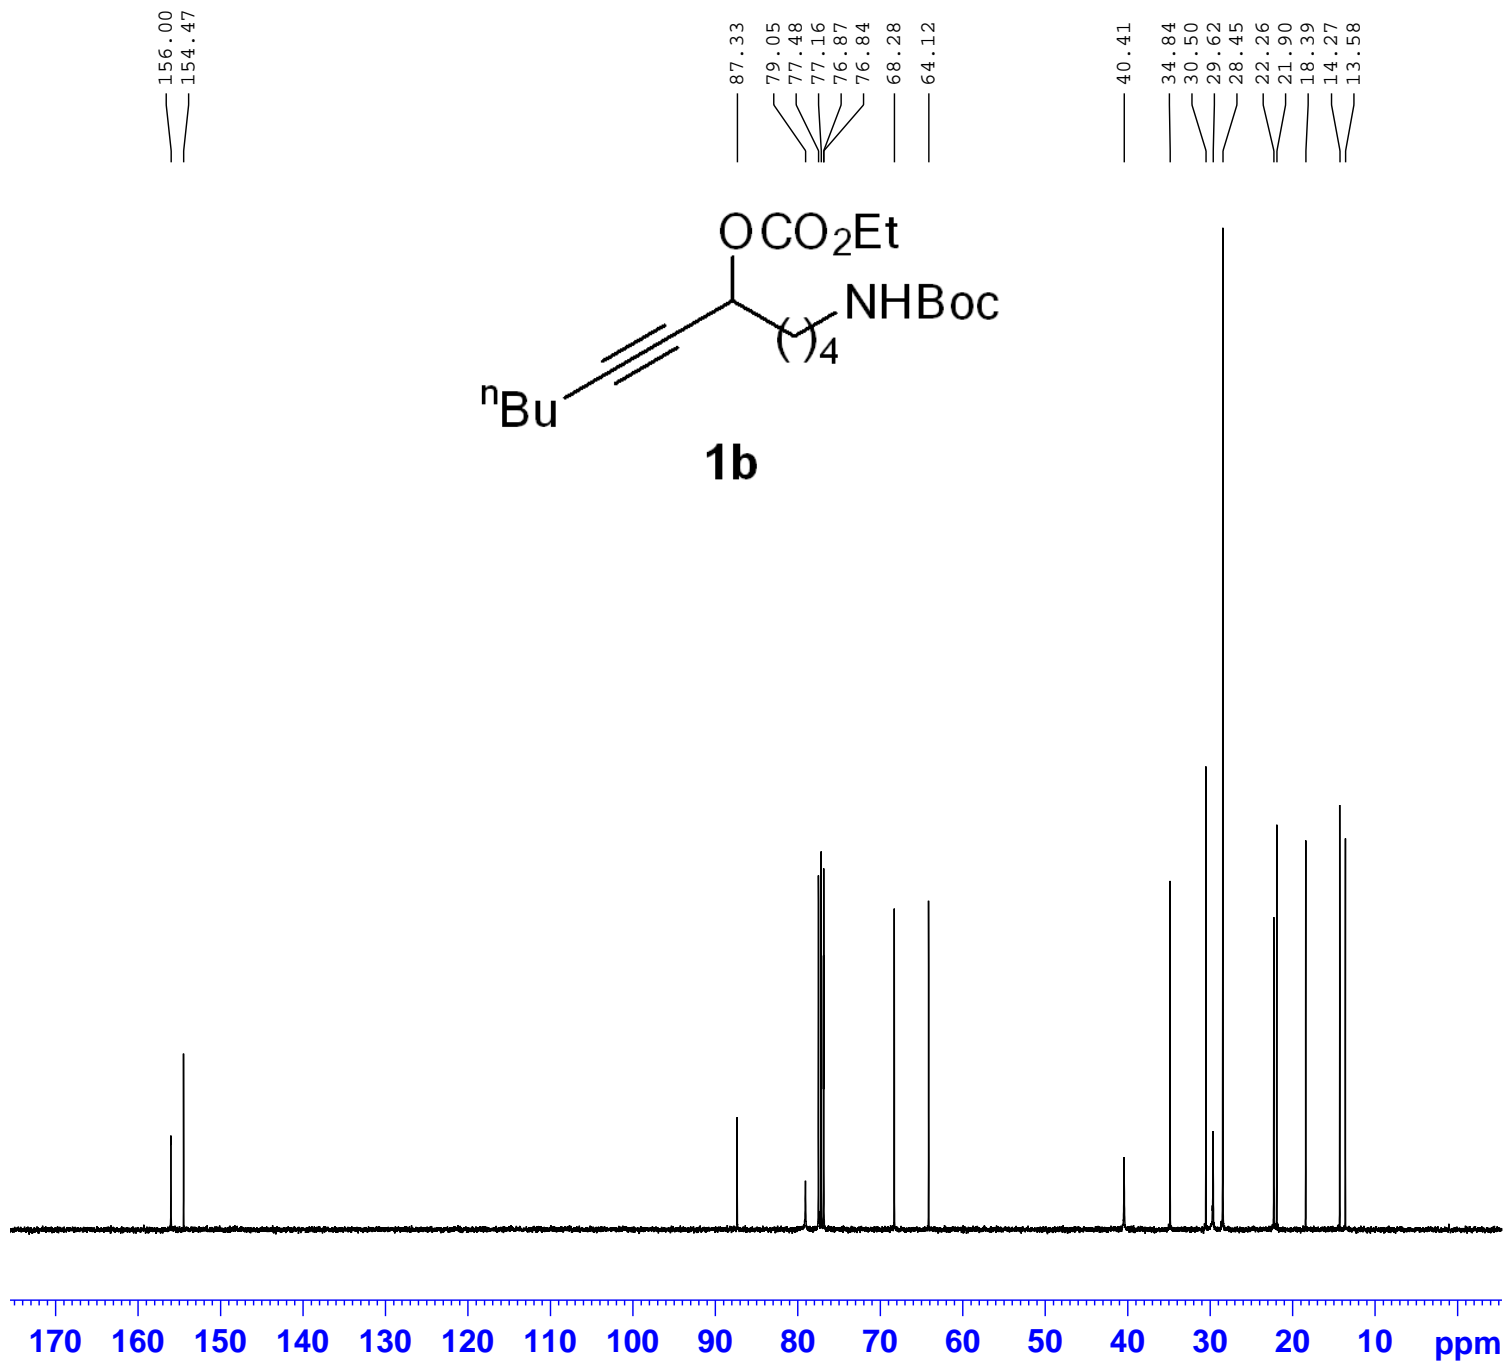

Current Data Parameters  
 NAME 2009-09-30 HJF 3-121  
 EXPNO 1  
 PROCNO 1

F2 - Acquisition Parameters  
 Date\_ 20090624  
 Time 22.24  
 INSTRUM spect  
 PROBHD 5 mm PABBO BB-  
 PULPROG zgpg30  
 TD 65536  
 SOLVENT CDCl3  
 NS 512  
 DS 0  
 SWH 24038.461 Hz  
 FIDRES 0.366798 Hz  
 AQ 1.3631988 sec  
 RG 181  
 DW 20.800 usec  
 DE 6.50 usec  
 TE 297.6 K  
 D1 2.00000000 sec  
 d11 0.03000000 sec  
 DELTA 1.89999998 sec  
 TD0 1

==== CHANNEL f1 =====  
 NUC1 13C  
 P1 15.50 usec  
 PL1 -1.00 dB  
 SFO1 100.6228298 MHz

==== CHANNEL f2 =====  
 CPDPRG2 waltz16  
 NUC2 1H  
 PCPD2 60.00 usec  
 PL12 11.35 dB  
 PL13 13.05 dB  
 PL2 -2.00 dB  
 SFO2 400.1316005 MHz

F2 - Processing parameters  
 SI 32768  
 SF 100.6127605 MHz  
 WDW EM  
 SSB 0  
 LB 0.60 Hz  
 GB 0  
 PC 1.40

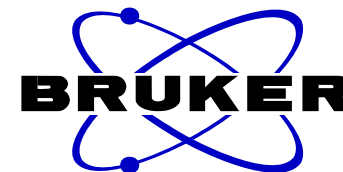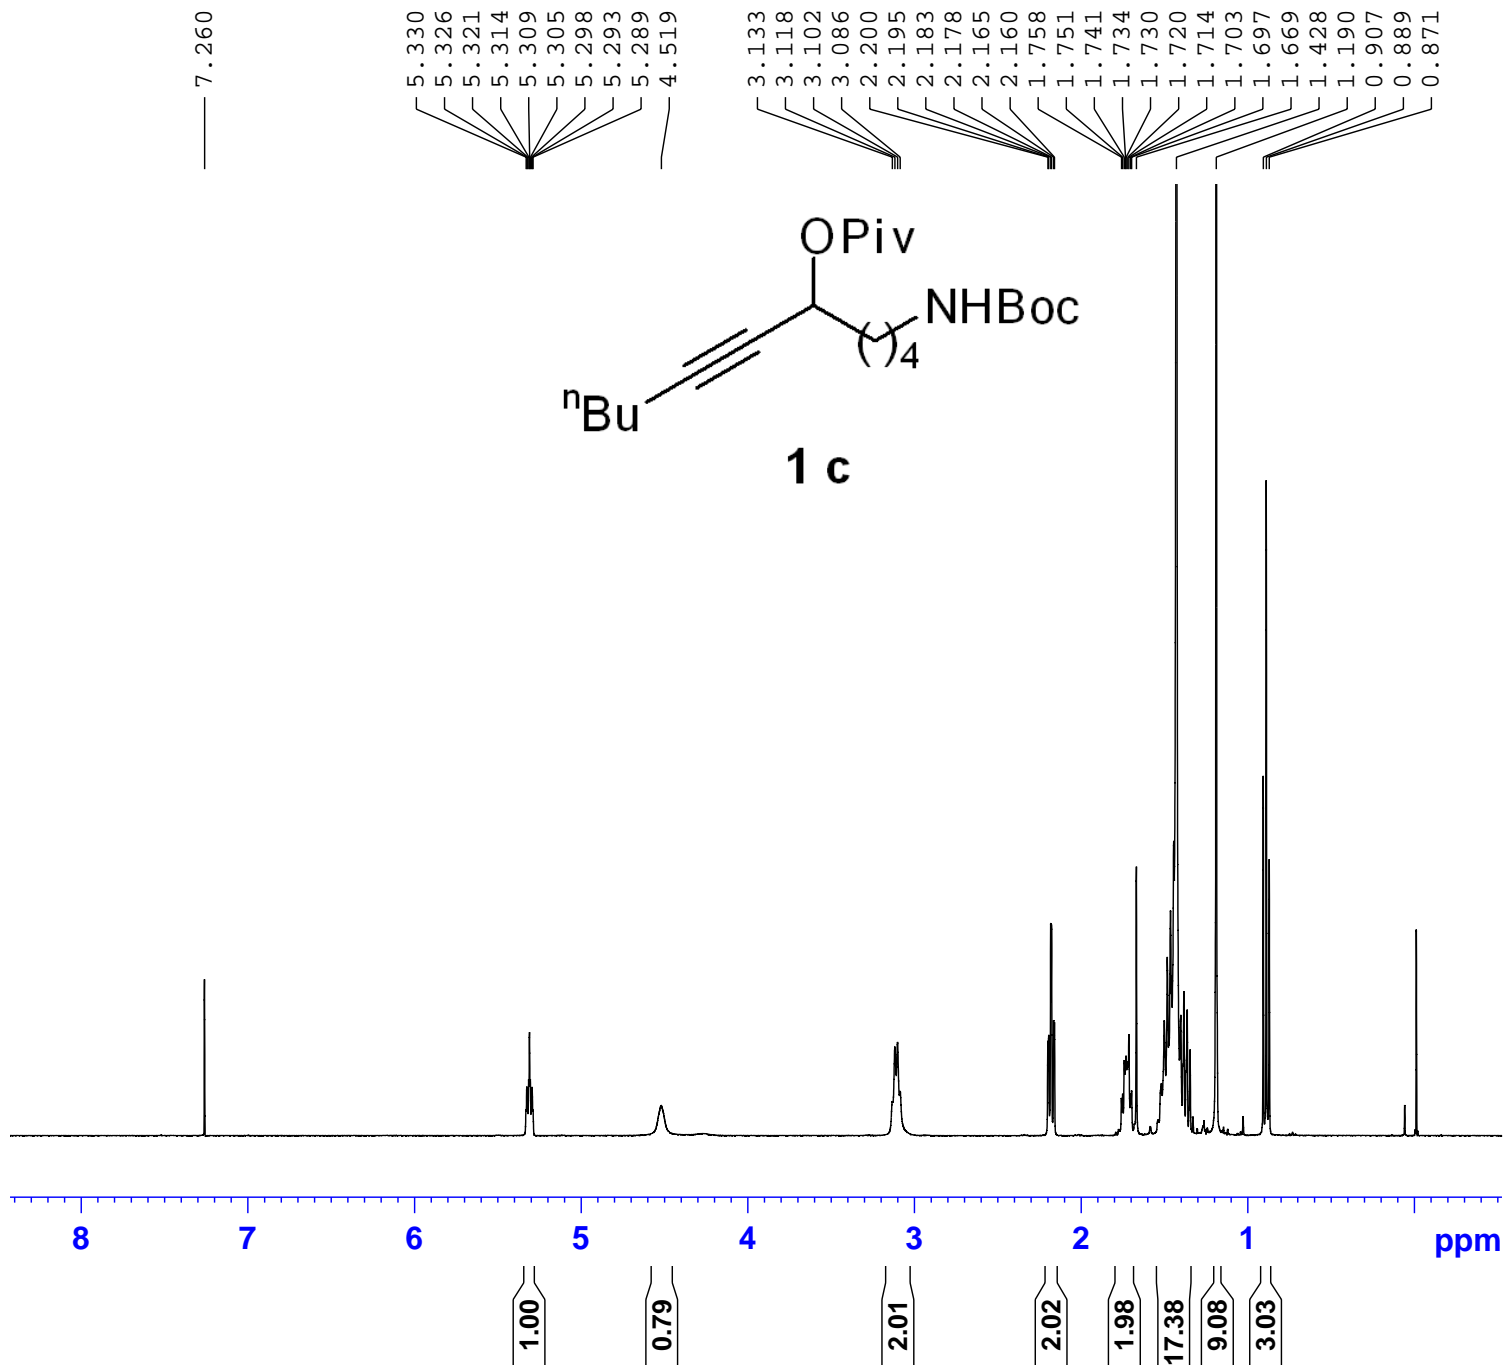

Current Data Parameters  
 NAME Aug10-2009 HJF 3-170  
 EXPNO 2  
 PROCNO 1

F2 - Acquisition Parameters  
 Date\_ 20090811  
 Time 3.17  
 INSTRUM spect  
 PROBHD 5 mm PABBO BB-  
 PULPROG zg30  
 TD 65536  
 SOLVENT CDC13  
 NS 16  
 DS 0  
 SWH 8223.685 Hz  
 FIDRES 0.125483 Hz  
 AQ 3.9846387 sec  
 RG 114  
 DW 60.800 usec  
 DE 6.50 usec  
 TE 295.4 K  
 D1 1.00000000 sec  
 TD0 1

===== CHANNEL f1 =====  
 NUC1 1H  
 P1 12.00 usec  
 PL1 -2.00 dB  
 SFO1 400.1324710 MHz

F2 - Processing parameters  
 SI 32768  
 SF 400.1300096 MHz  
 WDW GM  
 SSB 0  
 LB -0.20 Hz  
 GB 0.1  
 PC 1.00

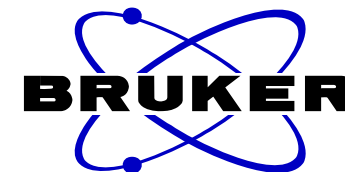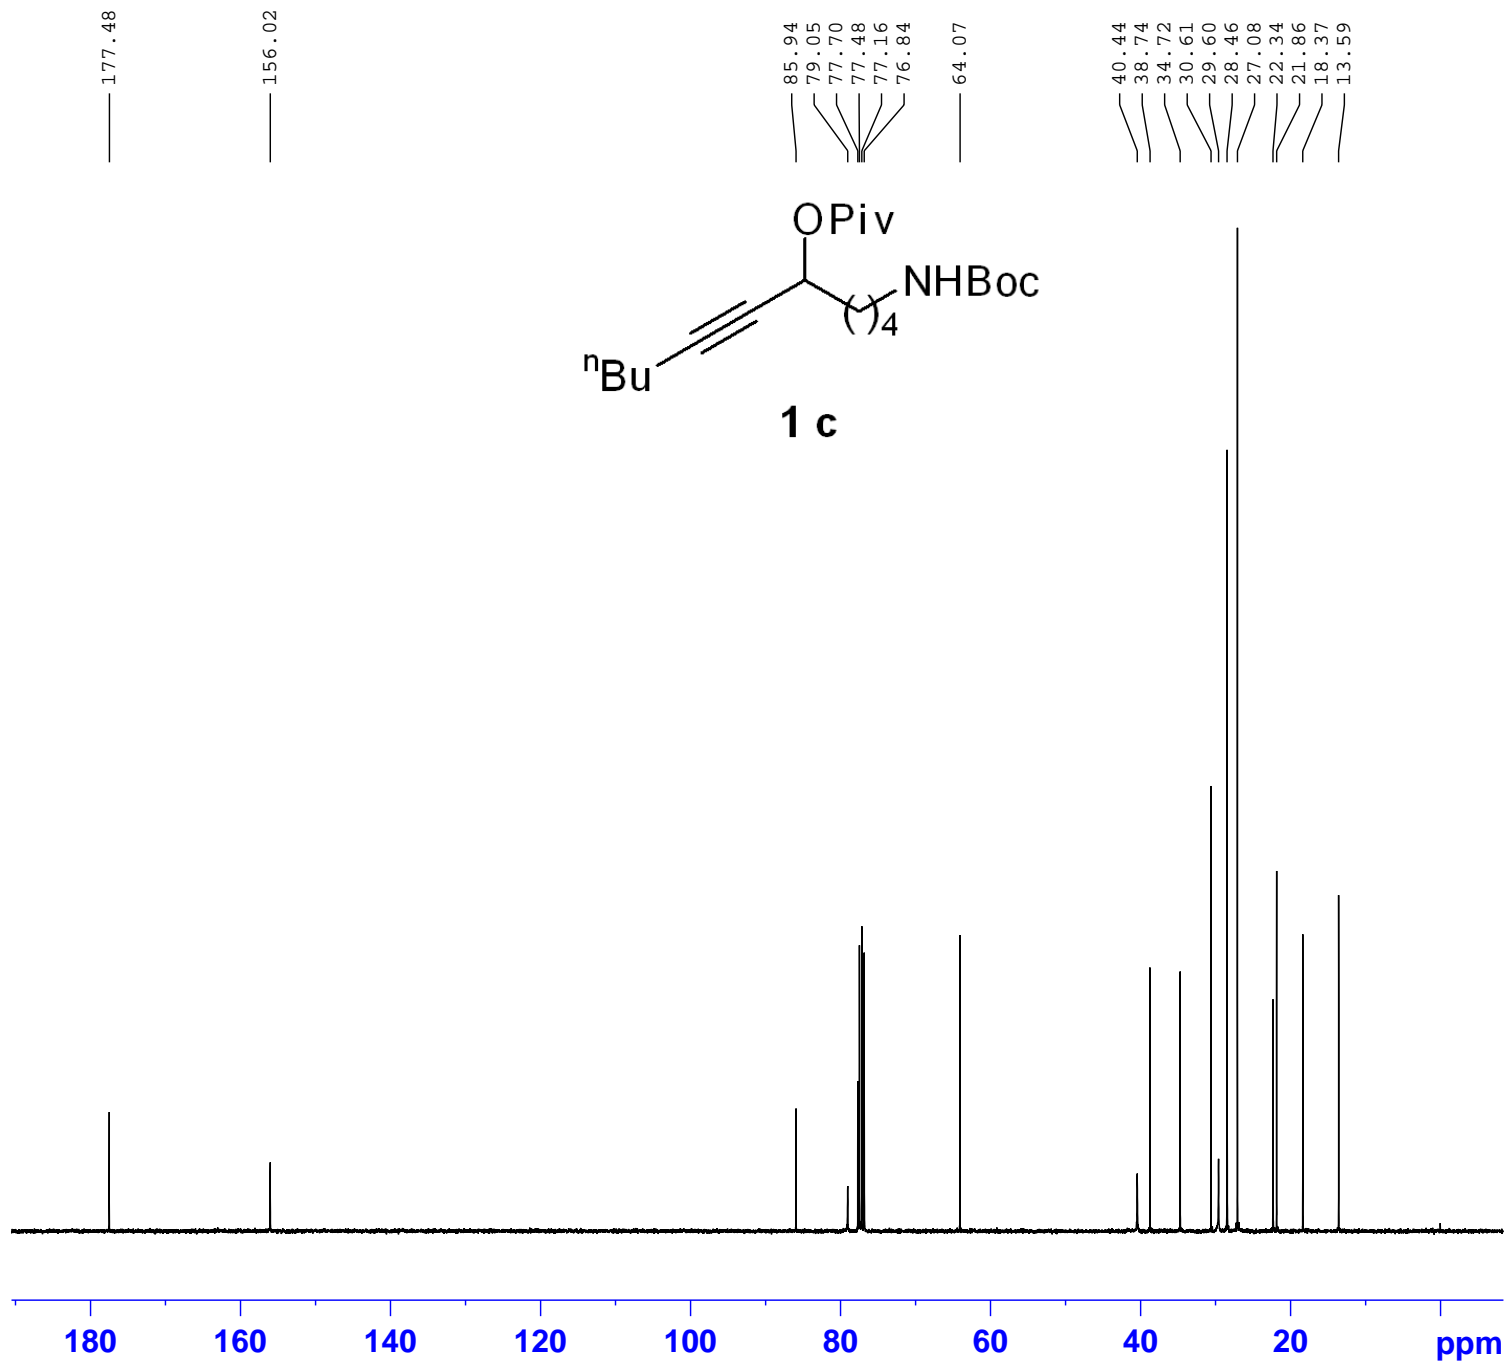

Current Data Parameters  
NAME 2009-08-18 HJF 3-170  
EXPNO 1  
PROCNO 1

F2 - Acquisition Parameters  
Date\_ 20090819  
Time 3.55  
INSTRUM spect  
PROBHD 5 mm PABBO BB-  
PULPROG zgpg30  
TD 65536  
SOLVENT CDC13  
NS 512  
DS 0  
SWH 24038.461 Hz  
FIDRES 0.366798 Hz  
AQ 1.3631988 sec  
RG 181  
DW 20.800 usec  
DE 6.50 usec  
TE 296.9 K  
D1 2.00000000 sec  
d11 0.03000000 sec  
DELTA 1.89999998 sec  
TD0 1

==== CHANNEL f1 =====  
NUC1 13C  
P1 15.50 usec  
PL1 -1.00 dB  
SFO1 100.6228298 MHz

==== CHANNEL f2 =====  
CPDPRG2 waltz16  
NUC2 1H  
PCPD2 60.00 usec  
PL12 11.35 dB  
PL13 13.05 dB  
PL2 -2.00 dB  
SFO2 400.1316005 MHz

F2 - Processing parameters  
SI 32768  
SF 100.6127596 MHz  
WDW EM  
SSB 0  
LB 0.60 Hz  
GB 0  
PC 1.40

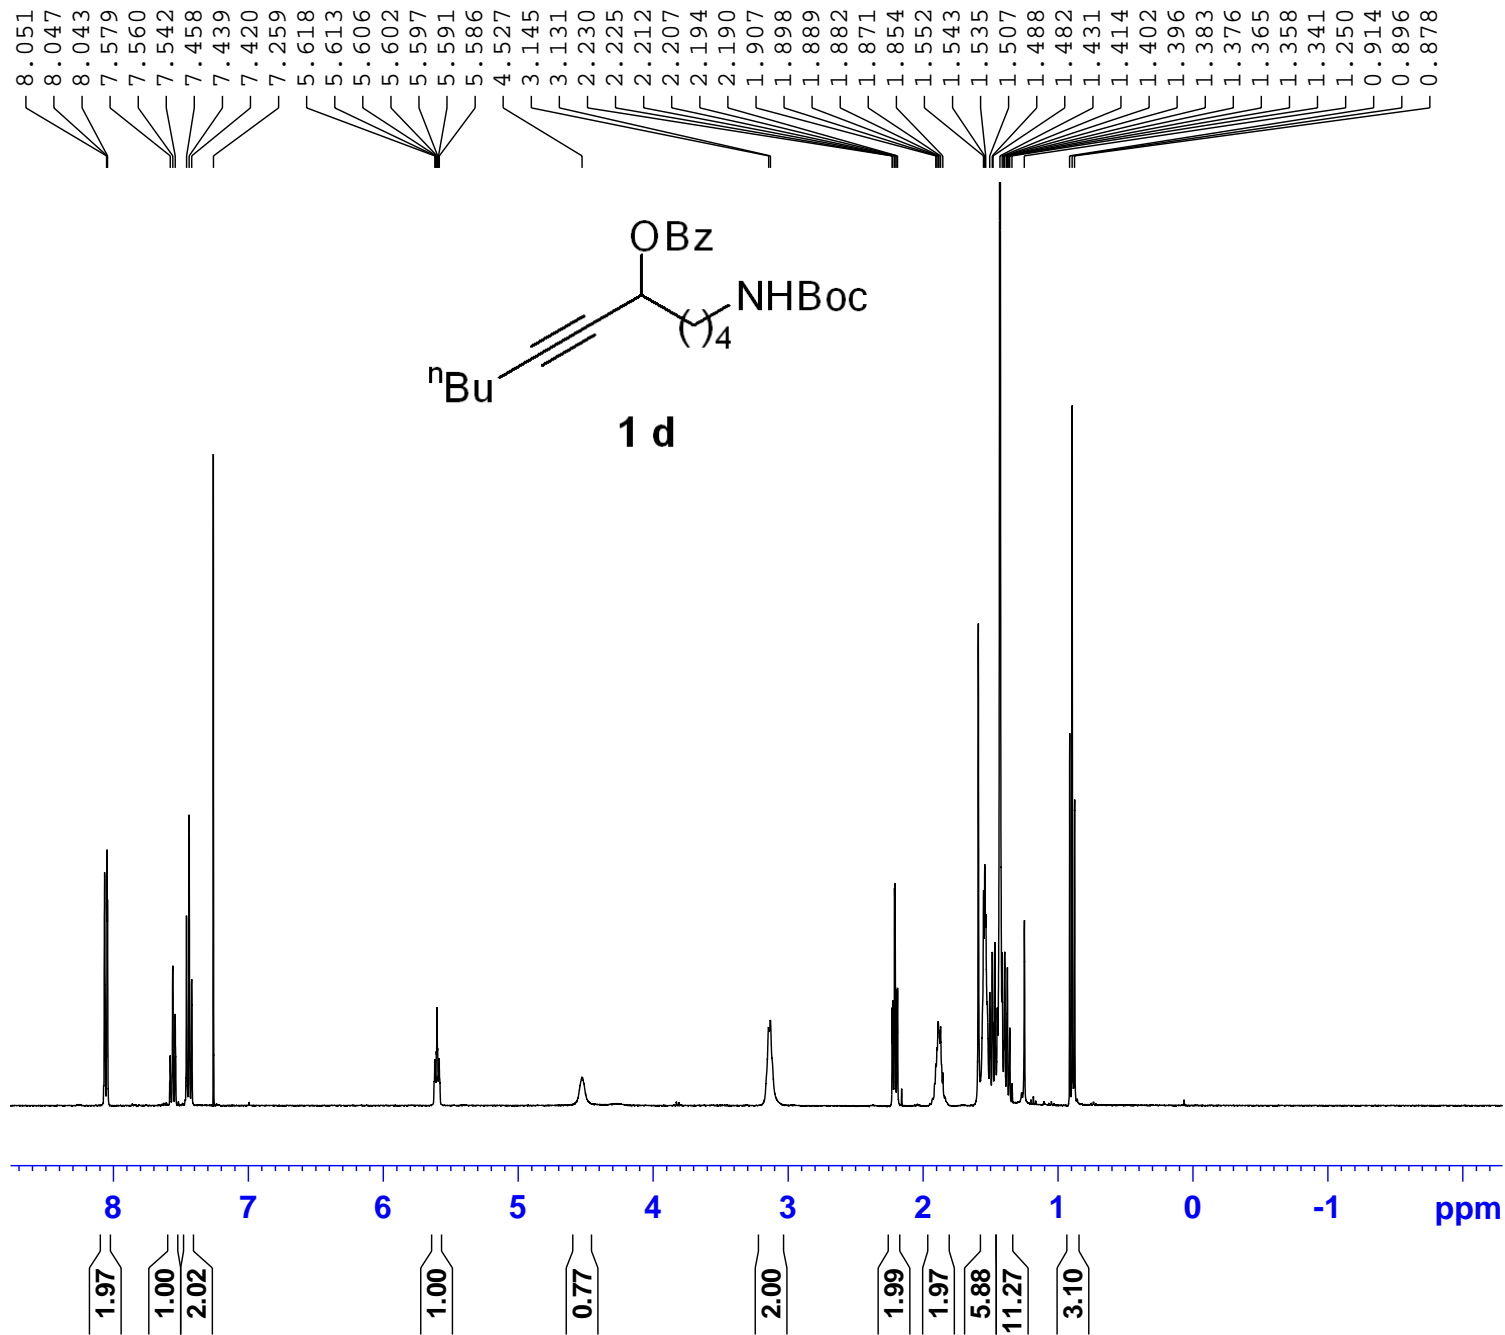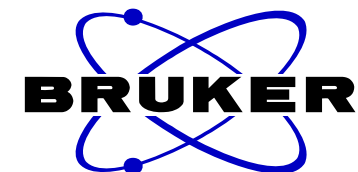

Current Data Parameters  
 NAME Jun22-2009 HJF 3-119  
 EXPNO 6  
 PROCNO 1

F2 - Acquisition Parameters  
 Date\_ 20090623  
 Time 1.41  
 INSTRUM spect  
 PROBHD 5 mm PABBO BB-  
 PULPROG zg30  
 TD 65536  
 SOLVENT CDC13  
 NS 16  
 DS 0  
 SWH 8223.685 Hz  
 FIDRES 0.125483 Hz  
 AQ 3.9846387 sec  
 RG 322  
 DW 60.800 usec  
 DE 6.50 usec  
 TE 296.1 K  
 D1 1.00000000 sec  
 TD0 1

==== CHANNEL f1 =====  
 NUC1 1H  
 P1 12.00 usec  
 PL1 -2.00 dB  
 SFO1 400.1324710 MHz

F2 - Processing parameters  
 SI 32768  
 SF 400.1300098 MHz  
 WDW GM  
 SSB 0  
 LB -0.20 Hz  
 GB 0.1  
 PC 1.00

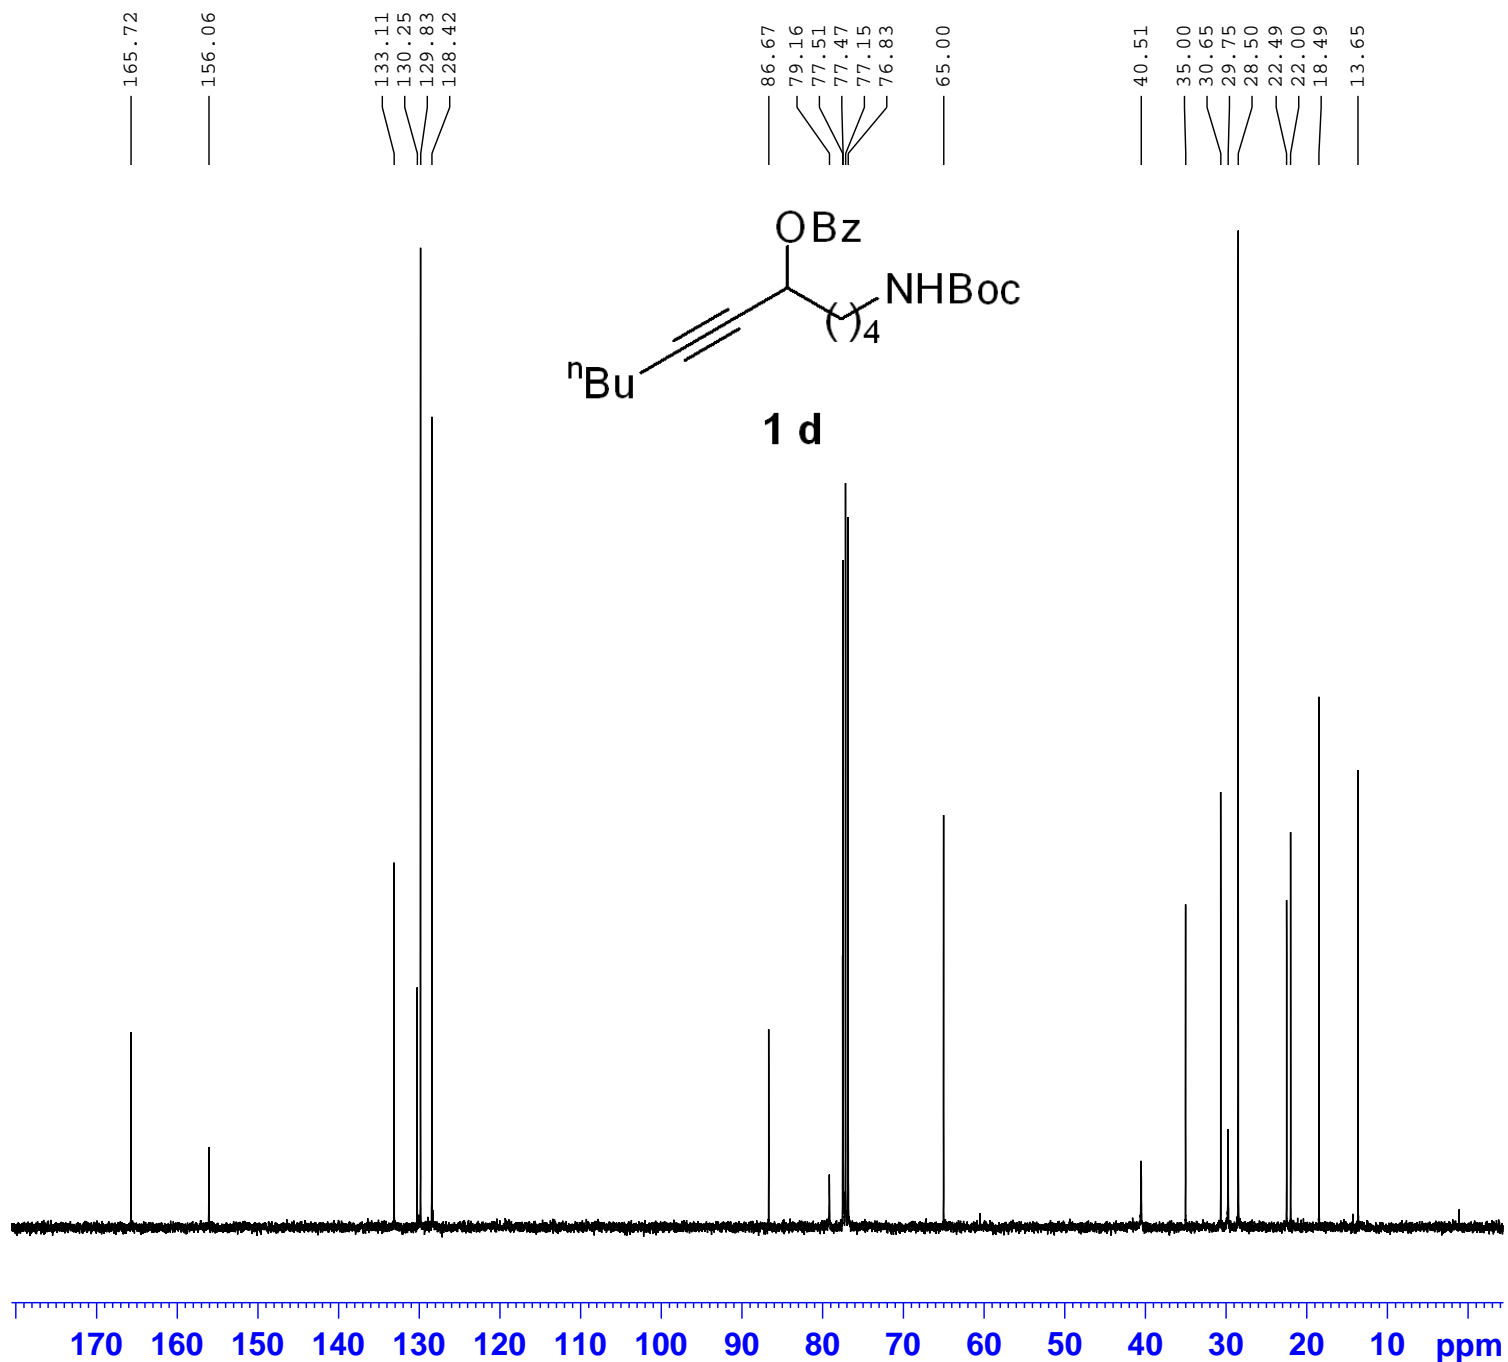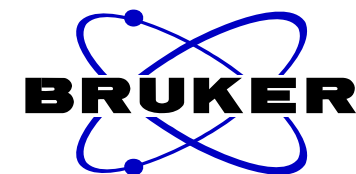

Current Data Parameters  
 NAME 2009-09-30 HJF 3-119  
 EXPNO 1  
 PROCNO 1

F2 - Acquisition Parameters  
 Date\_ 20090624  
 Time 21.47  
 INSTRUM spect  
 PROBHD 5 mm PABBO BB-  
 PULPROG zgpg30  
 TD 65536  
 SOLVENT CDCl3  
 NS 512  
 DS 0  
 SWH 24038.461 Hz  
 FIDRES 0.366798 Hz  
 AQ 1.3631988 sec  
 RG 181  
 DW 20.800 usec  
 DE 6.50 usec  
 TE 297.3 K  
 D1 2.00000000 sec  
 d11 0.03000000 sec  
 DELTA 1.89999998 sec  
 TD0 1

==== CHANNEL f1 =====  
 NUC1 13C  
 P1 15.50 usec  
 PL1 -1.00 dB  
 SFO1 100.6228298 MHz

==== CHANNEL f2 =====  
 CPDPRG2 waltz16  
 NUC2 1H  
 PCPD2 60.00 usec  
 PL12 11.35 dB  
 PL13 13.05 dB  
 PL2 -2.00 dB  
 SFO2 400.1316005 MHz

F2 - Processing parameters  
 SI 32768  
 SF 100.6127592 MHz  
 WDW EM  
 SSB 0  
 LB 0.60 Hz  
 GB 0  
 PC 1.40



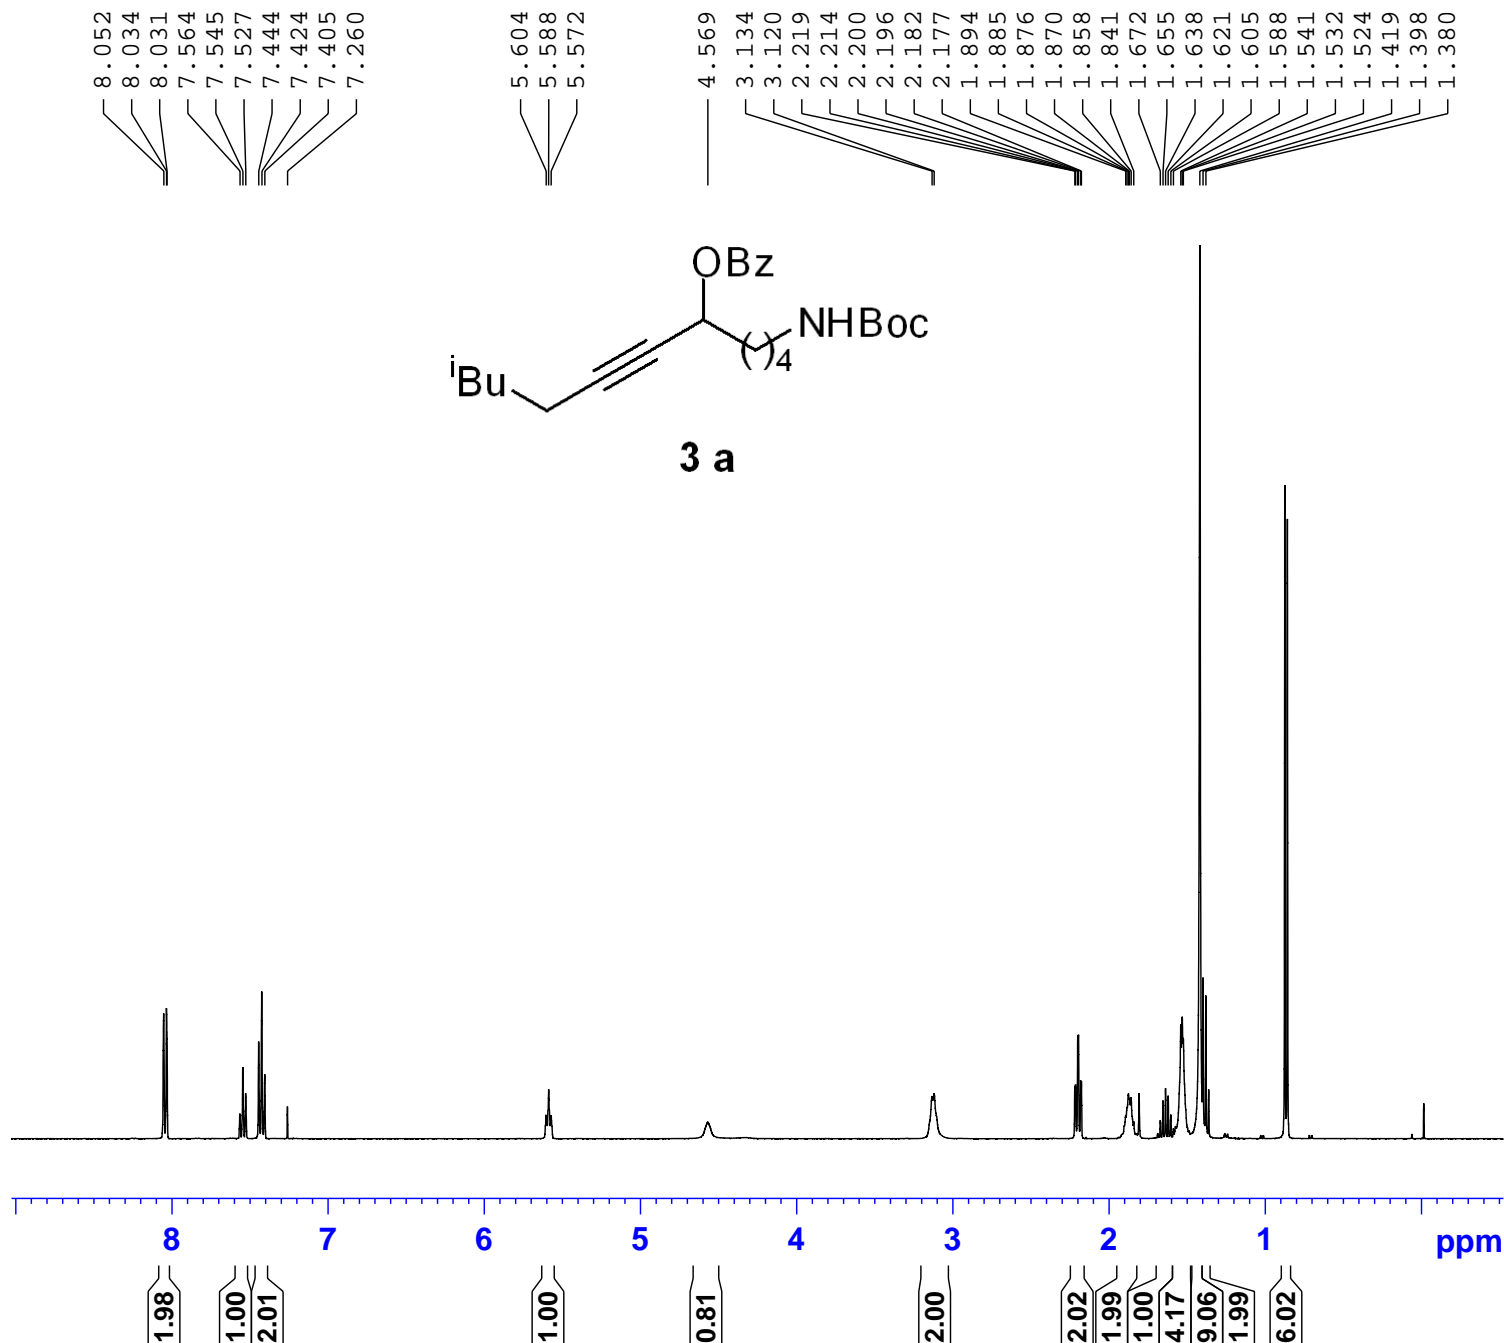

Current Data Parameters  
 NAME Nov03-2009  
 EXPNO 5  
 PROCNO 1

F2 - Acquisition Parameters  
 Date\_ 20091104  
 Time 1.32  
 INSTRUM spect  
 PROBHD 5 mm PABBO BB-  
 PULPROG zg30  
 TD 65536  
 SOLVENT CDCl3  
 NS 8  
 DS 0  
 SWH 8223.685 Hz  
 FIDRES 0.125483 Hz  
 AQ 3.9846387 sec  
 RG 64  
 DW 60.800 usec  
 DE 6.50 usec  
 TE 296.1 K  
 D1 1.00000000 sec  
 TD0 1

===== CHANNEL f1 =====  
 NUC1 1H  
 P1 12.00 usec  
 PL1 -2.00 dB  
 SFO1 400.1324710 MHz

F2 - Processing parameters  
 SI 32768  
 SF 400.1300095 MHz  
 WDW GM  
 SSB 0  
 LB -0.20 Hz  
 GB 0.1  
 PC 1.00

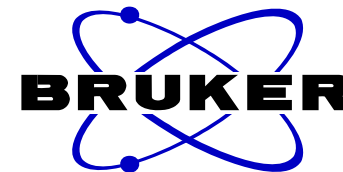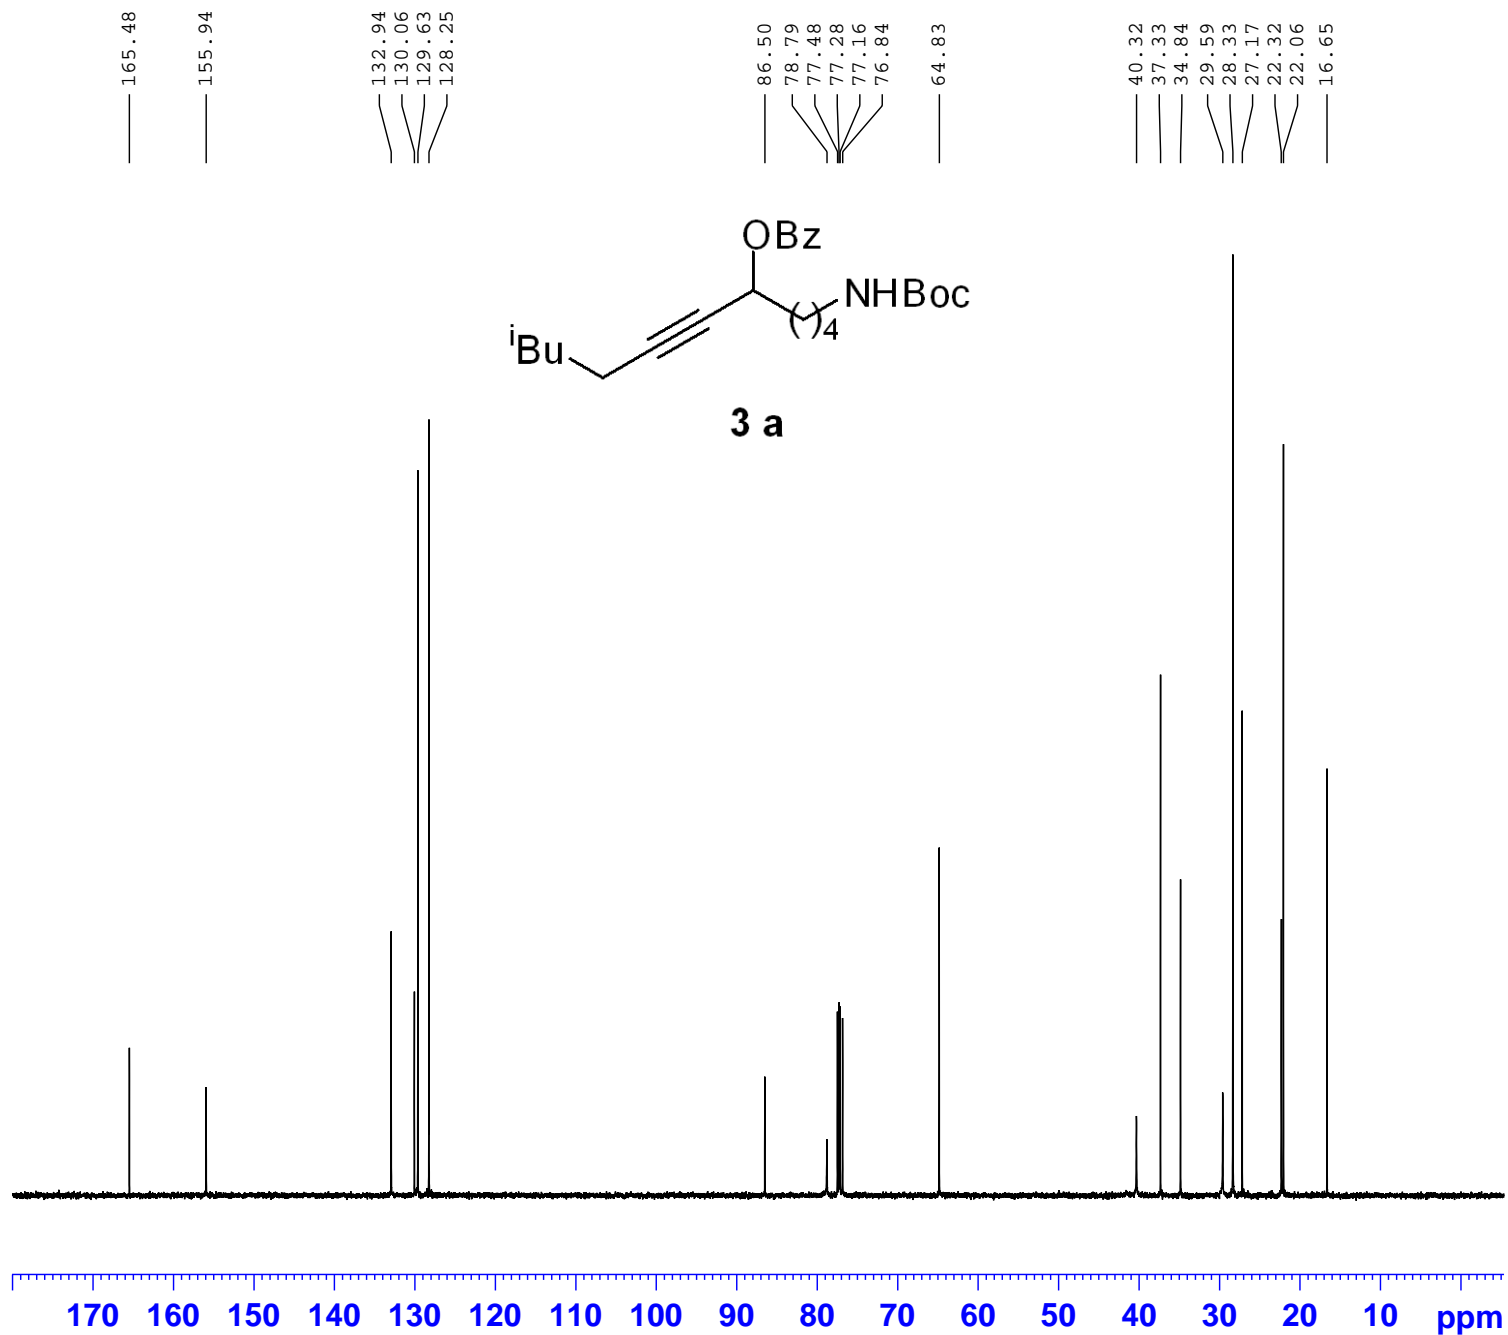

Current Data Parameters  
 NAME Nov06-2009 HJF 4-45  
 EXPNO 8  
 PROCNO 1

F2 - Acquisition Parameters  
 Date\_ 20091106  
 Time 23.00  
 INSTRUM spect  
 PROBHD 5 mm PABBO BB-  
 PULPROG zgpg30  
 TD 65536  
 SOLVENT CDCl3  
 NS 128  
 DS 0  
 SWH 24038.461 Hz  
 FIDRES 0.366798 Hz  
 AQ 1.3631988 sec  
 RG 2050  
 DW 20.800 usec  
 DE 6.50 usec  
 TE 297.1 K  
 D1 2.0000000 sec  
 d11 0.0300000 sec  
 DELTA 1.89999998 sec  
 TD0 1

==== CHANNEL f1 =====  
 NUC1 13C  
 P1 15.50 usec  
 PL1 -1.00 dB  
 SFO1 100.6228298 MHz

==== CHANNEL f2 =====  
 CPDPRG2 waltz16  
 NUC2 1H  
 PCPD2 60.00 usec  
 PL12 11.35 dB  
 PL13 13.05 dB  
 PL2 -2.00 dB  
 SFO2 400.1316005 MHz

F2 - Processing parameters  
 SI 32768  
 SF 100.6127724 MHz  
 WDW EM  
 SSB 0  
 LB 0.60 Hz  
 GB 0  
 PC 1.40

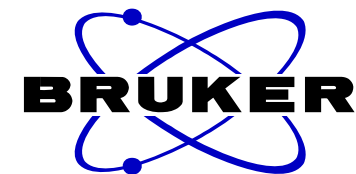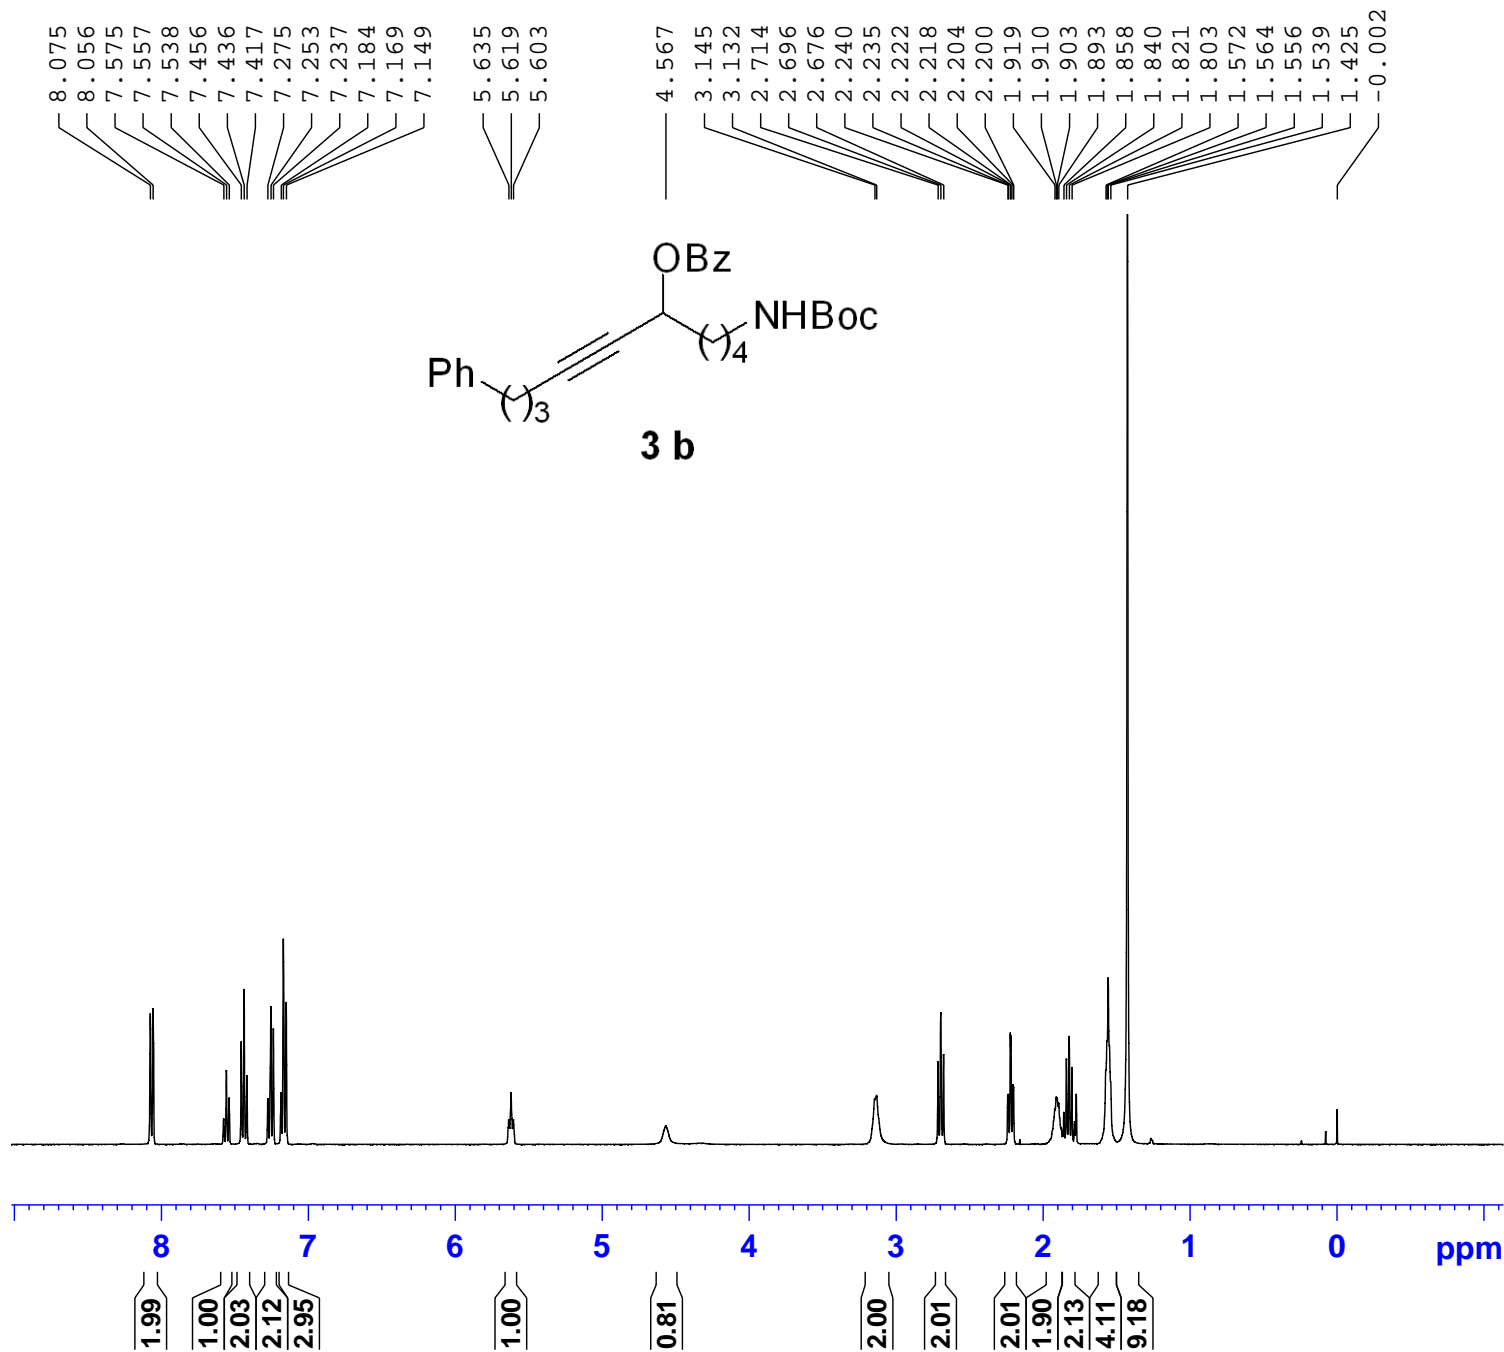

Current Data Parameters  
 NAME Nov03-2009  
 EXPNO 3  
 PROCNO 1

F2 - Acquisition Parameters  
 Date\_ 20091104  
 Time 1.22  
 INSTRUM spect  
 PROBHD 5 mm PABBO BB-  
 PULPROG zg30  
 TD 65536  
 SOLVENT CDCl3  
 NS 8  
 DS 0  
 SWH 8223.685 Hz  
 FIDRES 0.125483 Hz  
 AQ 3.9846387 sec  
 RG 64  
 DW 60.800 usec  
 DE 6.50 usec  
 TE 296.3 K  
 D1 1.00000000 sec  
 TD0 1

===== CHANNEL f1 =====  
 NUC1 1H  
 P1 12.00 usec  
 PL1 -2.00 dB  
 SFO1 400.1324710 MHz

F2 - Processing parameters  
 SI 32768  
 SF 400.1300125 MHz  
 WDW GM  
 SSB 0  
 LB -0.20 Hz  
 GB 0.1  
 PC 1.00

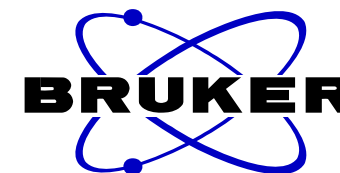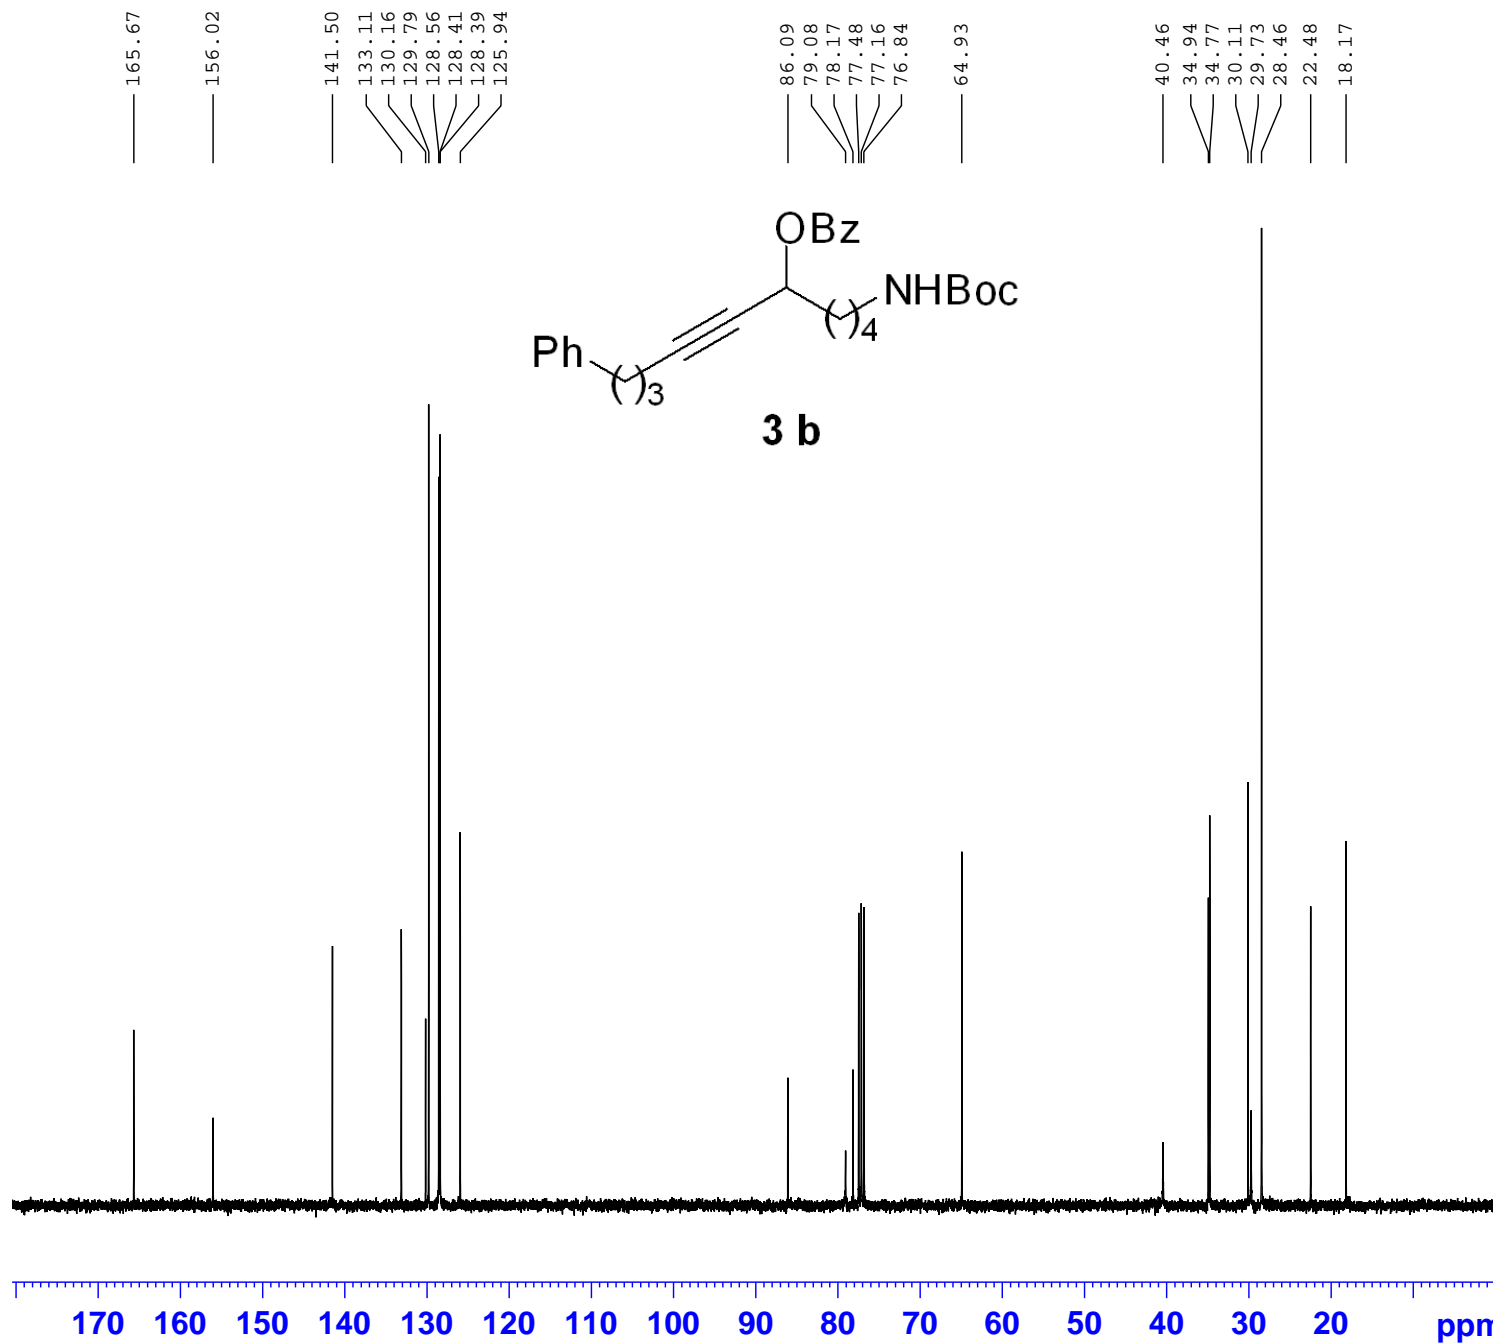

Current Data Parameters  
 NAME Nov06-2009 HJF 4-37  
 EXPNO 7  
 PROCNO 1

F2 - Acquisition Parameters  
 Date\_ 20091106  
 Time 22.48  
 INSTRUM spect  
 PROBHD 5 mm PABBO BB-  
 PULPROG zgpg30  
 TD 65536  
 SOLVENT CDC13  
 NS 128  
 DS 0  
 SWH 24038.461 Hz  
 FIDRES 0.366798 Hz  
 AQ 1.3631988 sec  
 RG 2050  
 DW 20.800 usec  
 DE 6.50 usec  
 TE 297.1 K  
 D1 2.00000000 sec  
 d11 0.03000000 sec  
 DELTA 1.89999998 sec  
 TD0 1

==== CHANNEL f1 =====  
 NUC1 13C  
 P1 15.50 usec  
 PL1 -1.00 dB  
 SFO1 100.6228298 MHz

==== CHANNEL f2 =====  
 CPDPRG2 waltz16  
 NUC2 1H  
 PCPD2 60.00 usec  
 PL12 11.35 dB  
 PL13 13.05 dB  
 PL2 -2.00 dB  
 SFO2 400.1316005 MHz

F2 - Processing parameters  
 SI 32768  
 SF 100.6127663 MHz  
 WDW EM  
 SSB 0  
 LB 0.60 Hz  
 GB 0  
 PC 1.40

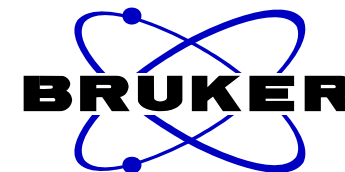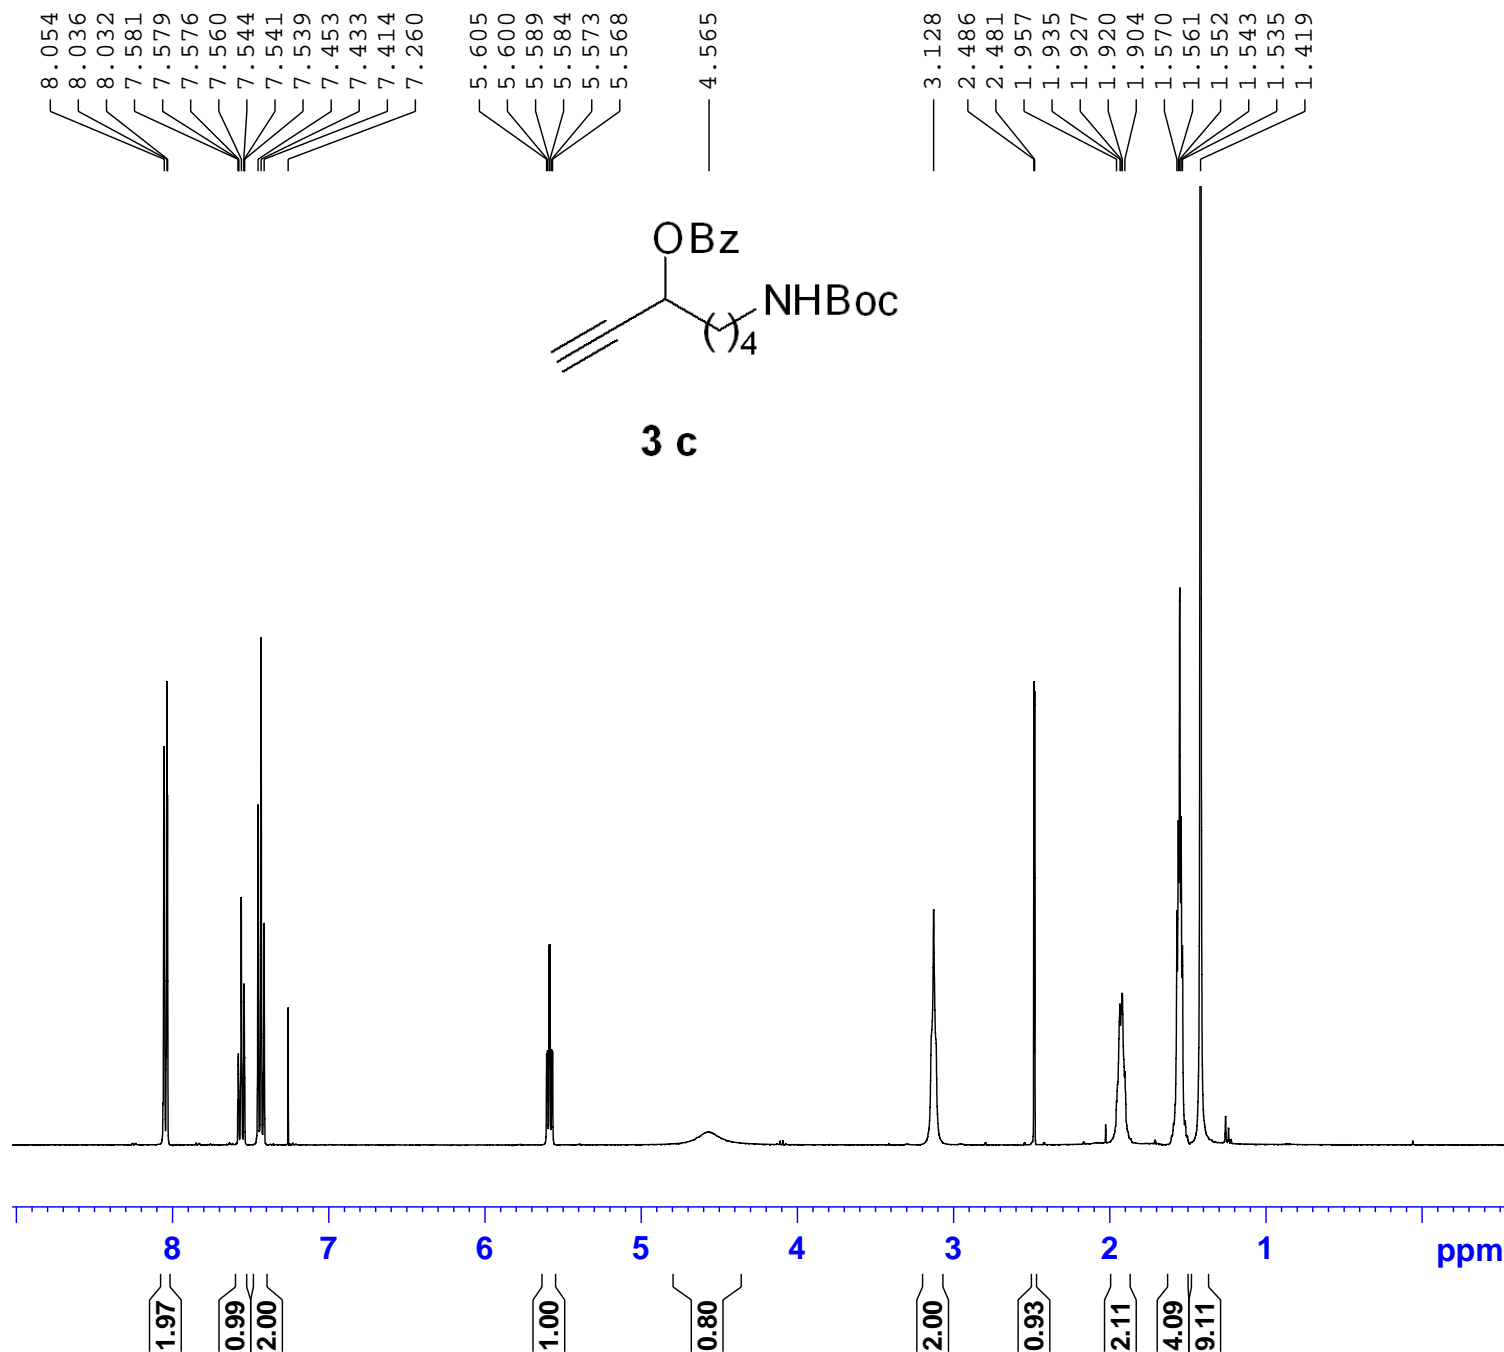

Current Data Parameters  
 NAME Jul15-2009-test HJF 3-135  
 EXPNO 5  
 PROCNO 1

F2 - Acquisition Parameters  
 Date\_ 20090716  
 Time 1.59  
 INSTRUM spect  
 PROBHD 5 mm PABBO BB-  
 PULPROG zg30  
 TD 65536  
 SOLVENT CDCl3  
 NS 16  
 DS 0  
 SWH 8223.685 Hz  
 FIDRES 0.125483 Hz  
 AQ 3.9846387 sec  
 RG 71.8  
 DW 60.800 usec  
 DE 6.50 usec  
 TE 295.7 K  
 D1 1.00000000 sec  
 TD0 1

===== CHANNEL f1 =====  
 NUC1 1H  
 P1 12.00 usec  
 PL1 -2.00 dB  
 SFO1 400.1324710 MHz

F2 - Processing parameters  
 SI 32768  
 SF 400.1300094 MHz  
 WDW GM  
 SSB 0  
 LB -0.20 Hz  
 GB 0.1  
 PC 1.00

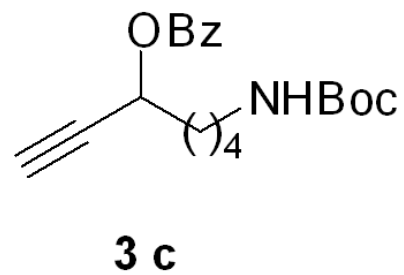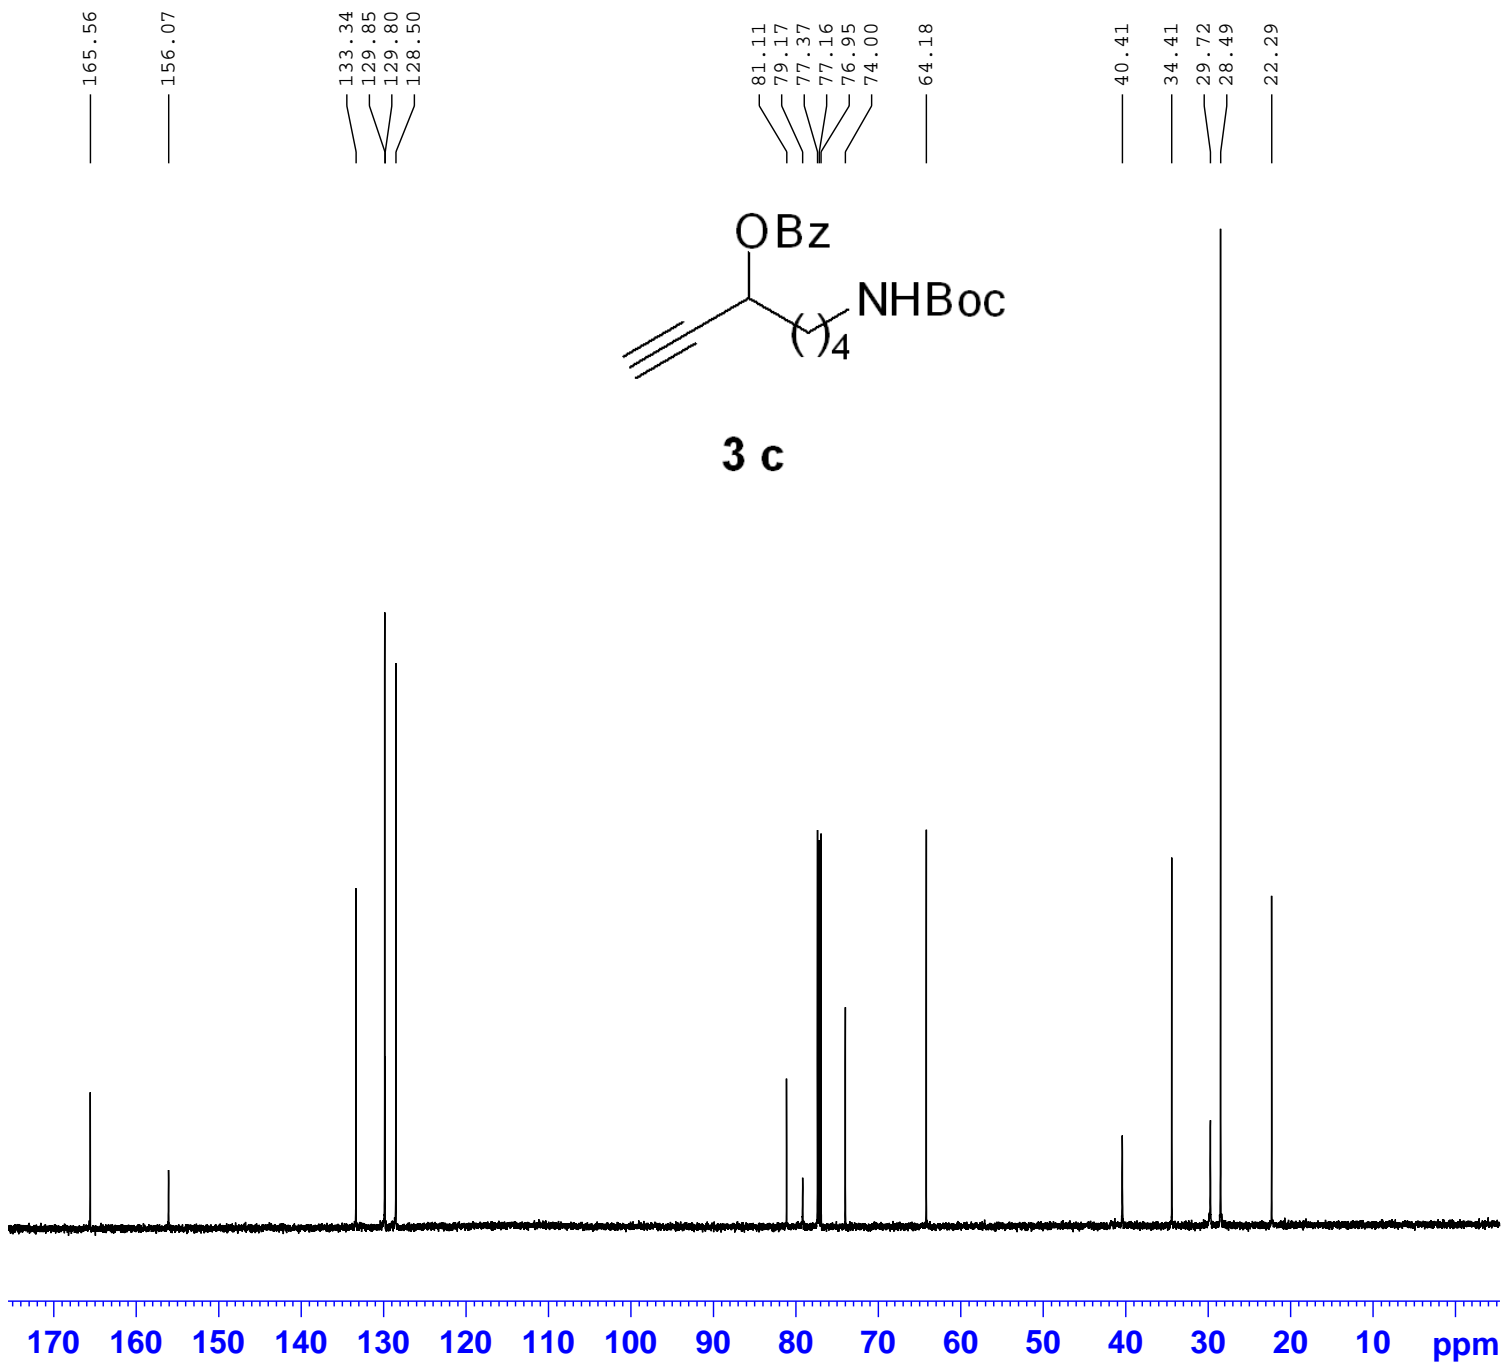

Current Data Parameters  
 NAME 2009-09-30 HJF 3-135  
 EXPNO 2  
 PROCNO 1

F2 - Acquisition Parameters  
 Date\_ 20090722  
 Time 21.49  
 INSTRUM spect  
 PROBHD 5 mm PATXI 1H/  
 PULPROG zgpg30  
 TD 65536  
 SOLVENT CDCl3  
 NS 345  
 DS 0  
 SWH 36057.691 Hz  
 FIDRES 0.550197 Hz  
 AQ 0.9088159 sec  
 RG 90.5  
 DW 13.867 usec  
 DE 6.50 usec  
 TE 296.4 K  
 D1 2.00000000 sec  
 d11 0.03000000 sec  
 DELTA 1.89999998 sec  
 TD0 1

==== CHANNEL f1 =====  
 NUC1 13C  
 P1 11.50 usec  
 PL1 -3.00 dB  
 SFO1 150.9178988 MHz

==== CHANNEL f2 =====  
 CPDPRG2 waltz16  
 NUC2 1H  
 PCPD2 80.00 usec  
 PL12 19.50 dB  
 PL13 19.50 dB  
 PL2 -1.00 dB  
 SFO2 600.1324005 MHz

F2 - Processing parameters  
 SI 32768  
 SF 150.9027954 MHz  
 WDW EM  
 SSB 0  
 LB 0.60 Hz  
 GB 0  
 PC 1.40

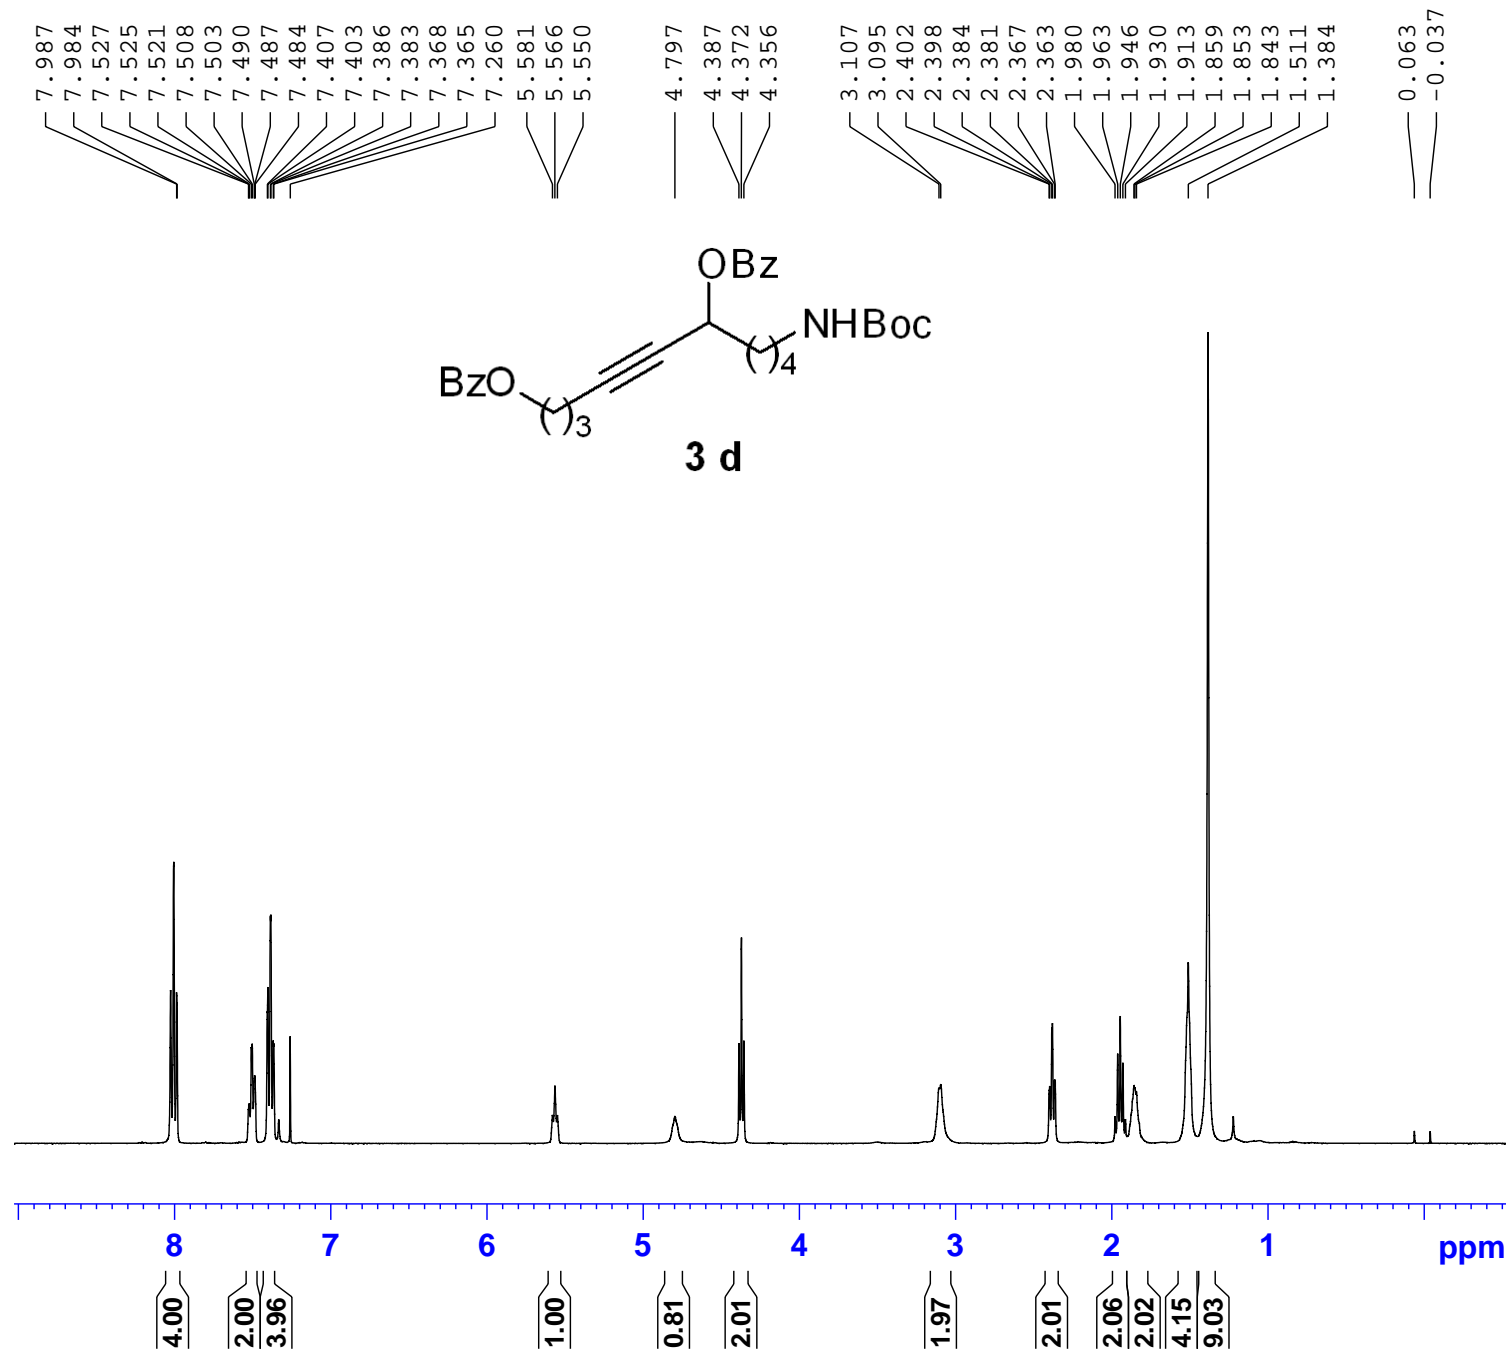

Current Data Parameters  
 NAME Oct29-2009 HX 1-140  
 EXPNO 7  
 PROCNO 1

F2 - Acquisition Parameters  
 Date\_ 20091030  
 Time 2.32  
 INSTRUM spect  
 PROBHD 5 mm PABBO BB-  
 PULPROG zg30  
 TD 65536  
 SOLVENT CDCl3  
 NS 8  
 DS 0  
 SWH 8223.685 Hz  
 FIDRES 0.125483 Hz  
 AQ 3.9846387 sec  
 RG 28.5  
 DW 60.800 usec  
 DE 6.50 usec  
 TE 295.9 K  
 D1 1.00000000 sec  
 TD0 1

===== CHANNEL f1 =====  
 NUC1 1H  
 P1 12.00 usec  
 PL1 -2.00 dB  
 SFO1 400.1324710 MHz

F2 - Processing parameters  
 SI 32768  
 SF 400.1300090 MHz  
 WDW GM  
 SSB 0  
 LB -0.20 Hz  
 GB 0.1  
 PC 1.00

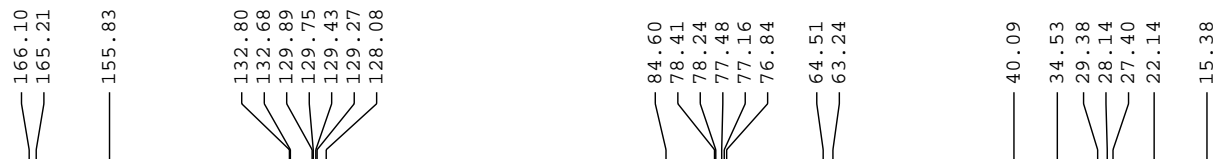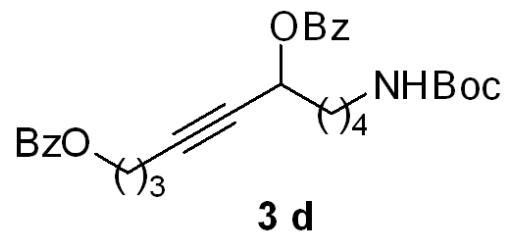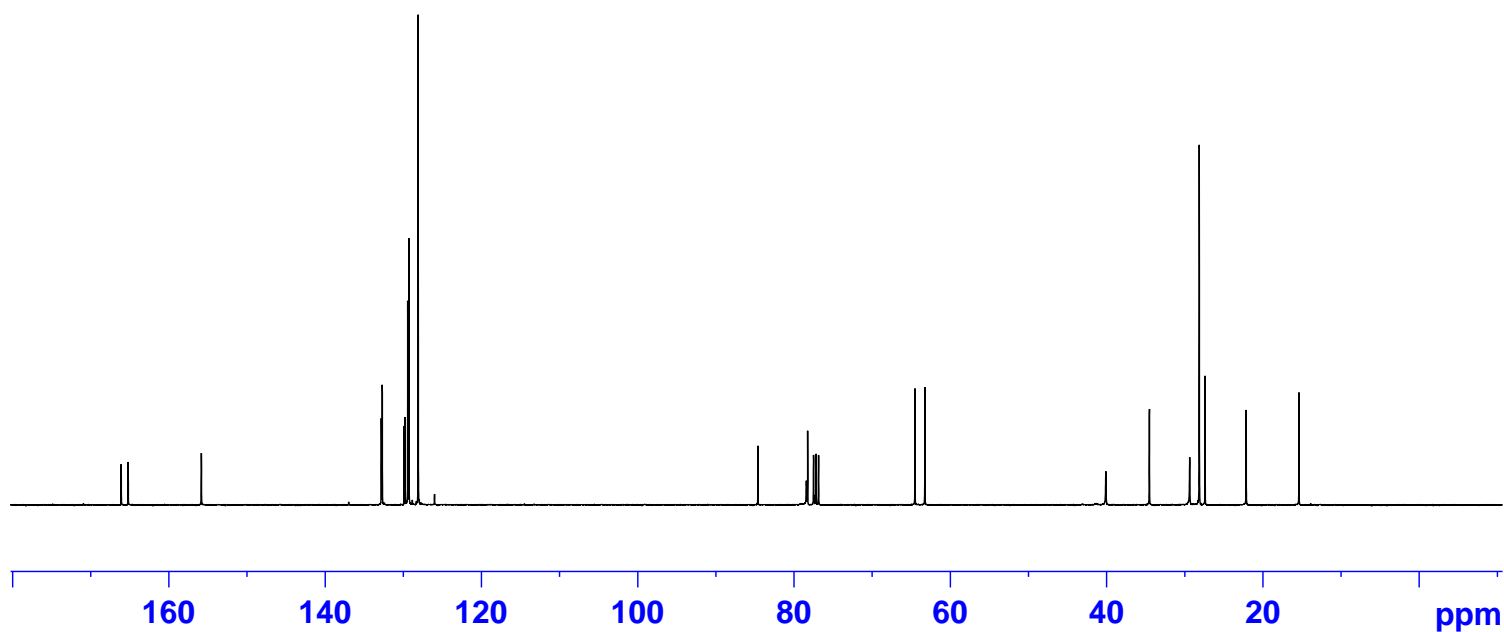

Current Data Parameters  
 NAME 2009-11-24 HX-1-140  
 EXPNO 2  
 PROCNO 1

F2 - Acquisition Parameters  
 Date\_ 20091124  
 Time 20.56  
 INSTRUM spect  
 PROBHD 5 mm PABBO BB-  
 PULPROG zgpg30  
 TD 65536  
 SOLVENT CDC13  
 NS 512  
 DS 0  
 SWH 24038.461 Hz  
 FIDRES 0.366798 Hz  
 AQ 1.3631988 sec  
 RG 181  
 DW 20.800 usec  
 DE 6.50 usec  
 TE 298.3 K  
 D1 2.00000000 sec  
 d11 0.03000000 sec  
 DELTA 1.89999998 sec  
 TD0 1

==== CHANNEL f1 =====  
 NUC1 13C  
 P1 15.50 usec  
 PL1 -1.00 dB  
 SFO1 100.6228298 MHz

==== CHANNEL f2 =====  
 CPDPRG2 waltz16  
 NUC2 1H  
 PCPD2 60.00 usec  
 PL12 11.35 dB  
 PL13 13.05 dB  
 PL2 -2.00 dB  
 SFO2 400.1316005 MHz

F2 - Processing parameters  
 SI 32768  
 SF 100.6127899 MHz  
 WDW EM  
 SSB 0  
 LB 0.60 Hz  
 GB 0  
 PC 1.40



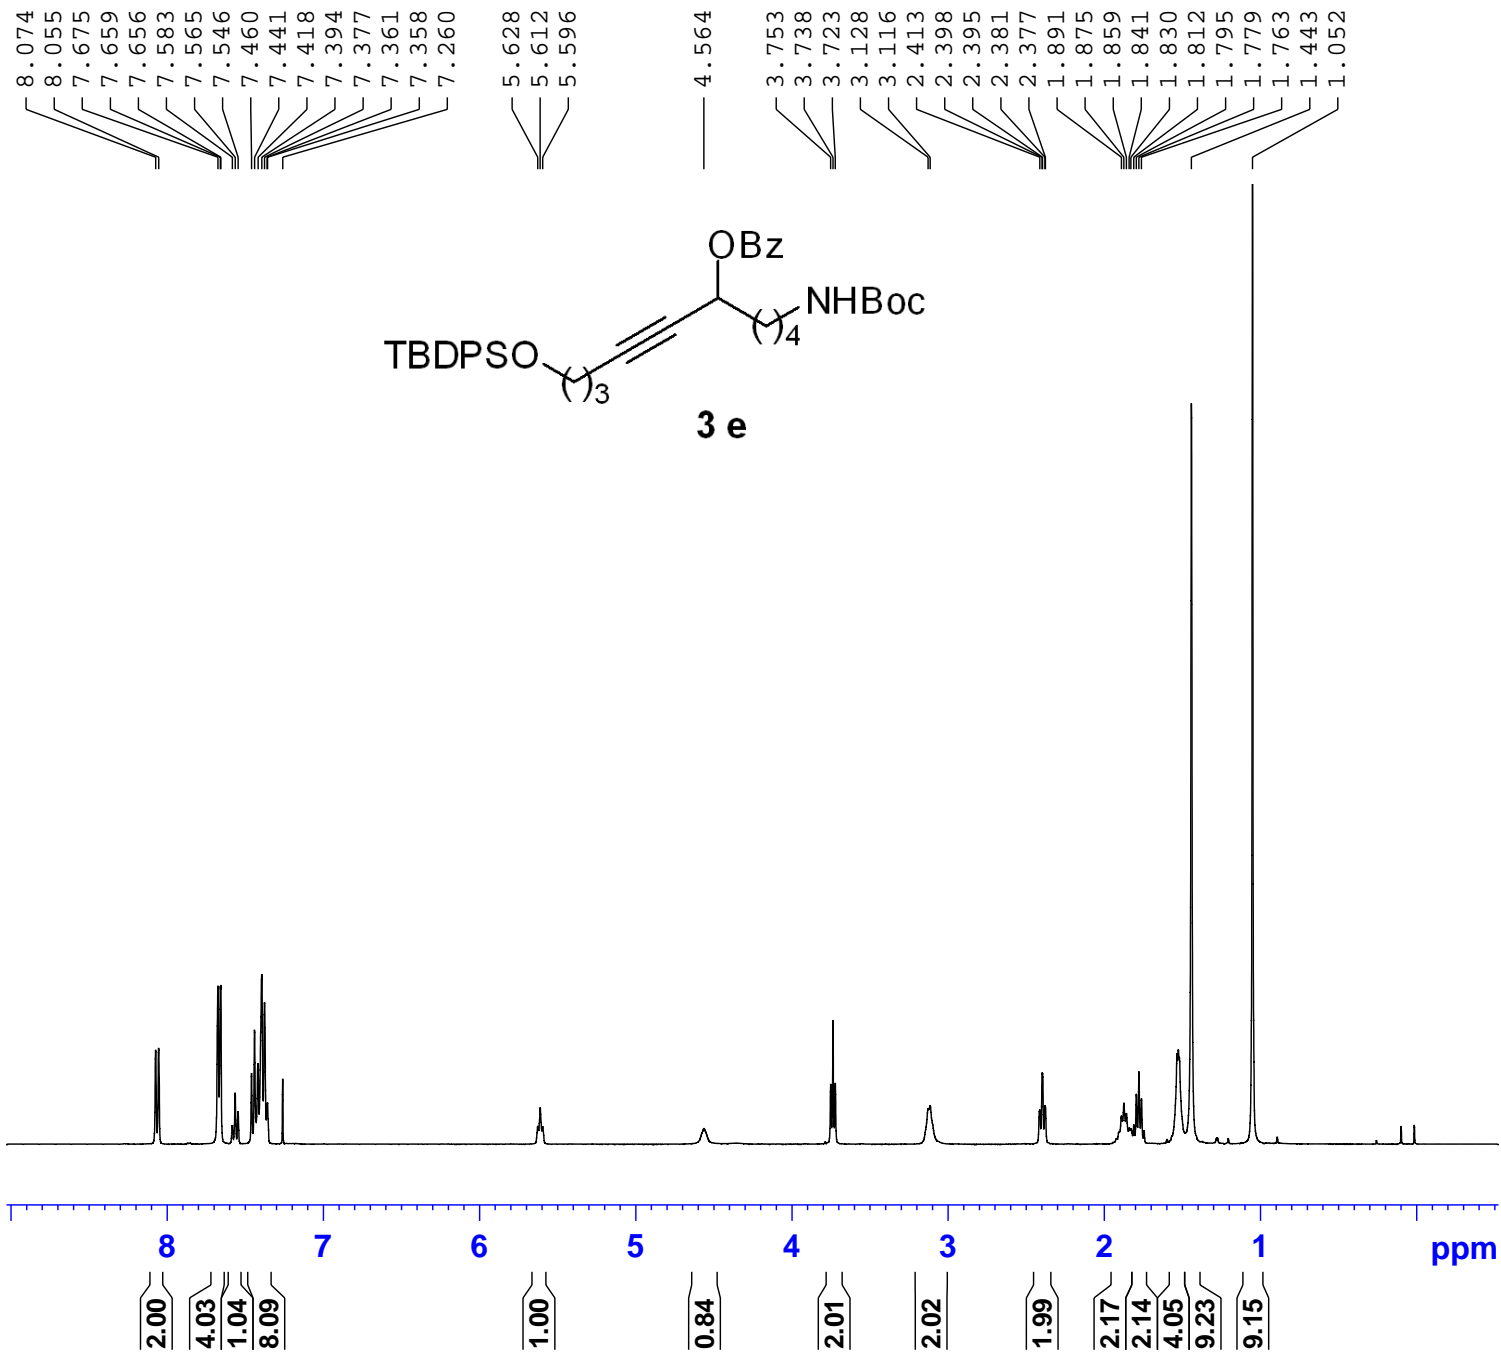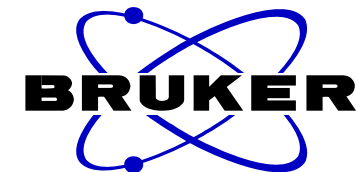

Current Data Parameters  
 NAME Oct29-2009 HX 1-138  
 EXPNO 6  
 PROCNO 1

F2 - Acquisition Parameters  
 Date\_ 20091030  
 Time 2.27  
 INSTRUM spect  
 PROBHD 5 mm PABBO BB-  
 PULPROG zg30  
 TD 65536  
 SOLVENT CDC13  
 NS 8  
 DS 0  
 SWH 8223.685 Hz  
 FIDRES 0.125483 Hz  
 AQ 3.9846387 sec  
 RG 45.2  
 DW 60.800 usec  
 DE 6.50 usec  
 TE 296.0 K  
 D1 1.00000000 sec  
 TD0 1

===== CHANNEL f1 =====  
 NUC1 1H  
 P1 12.00 usec  
 PL1 -2.00 dB  
 SFO1 400.1324710 MHz

F2 - Processing parameters  
 SI 32768  
 SF 400.1300091 MHz  
 WDW GM  
 SSB 0  
 LB -0.20 Hz  
 GB 0.1  
 PC 1.00

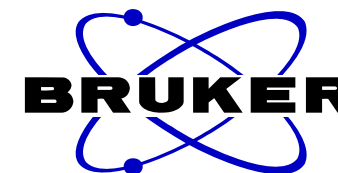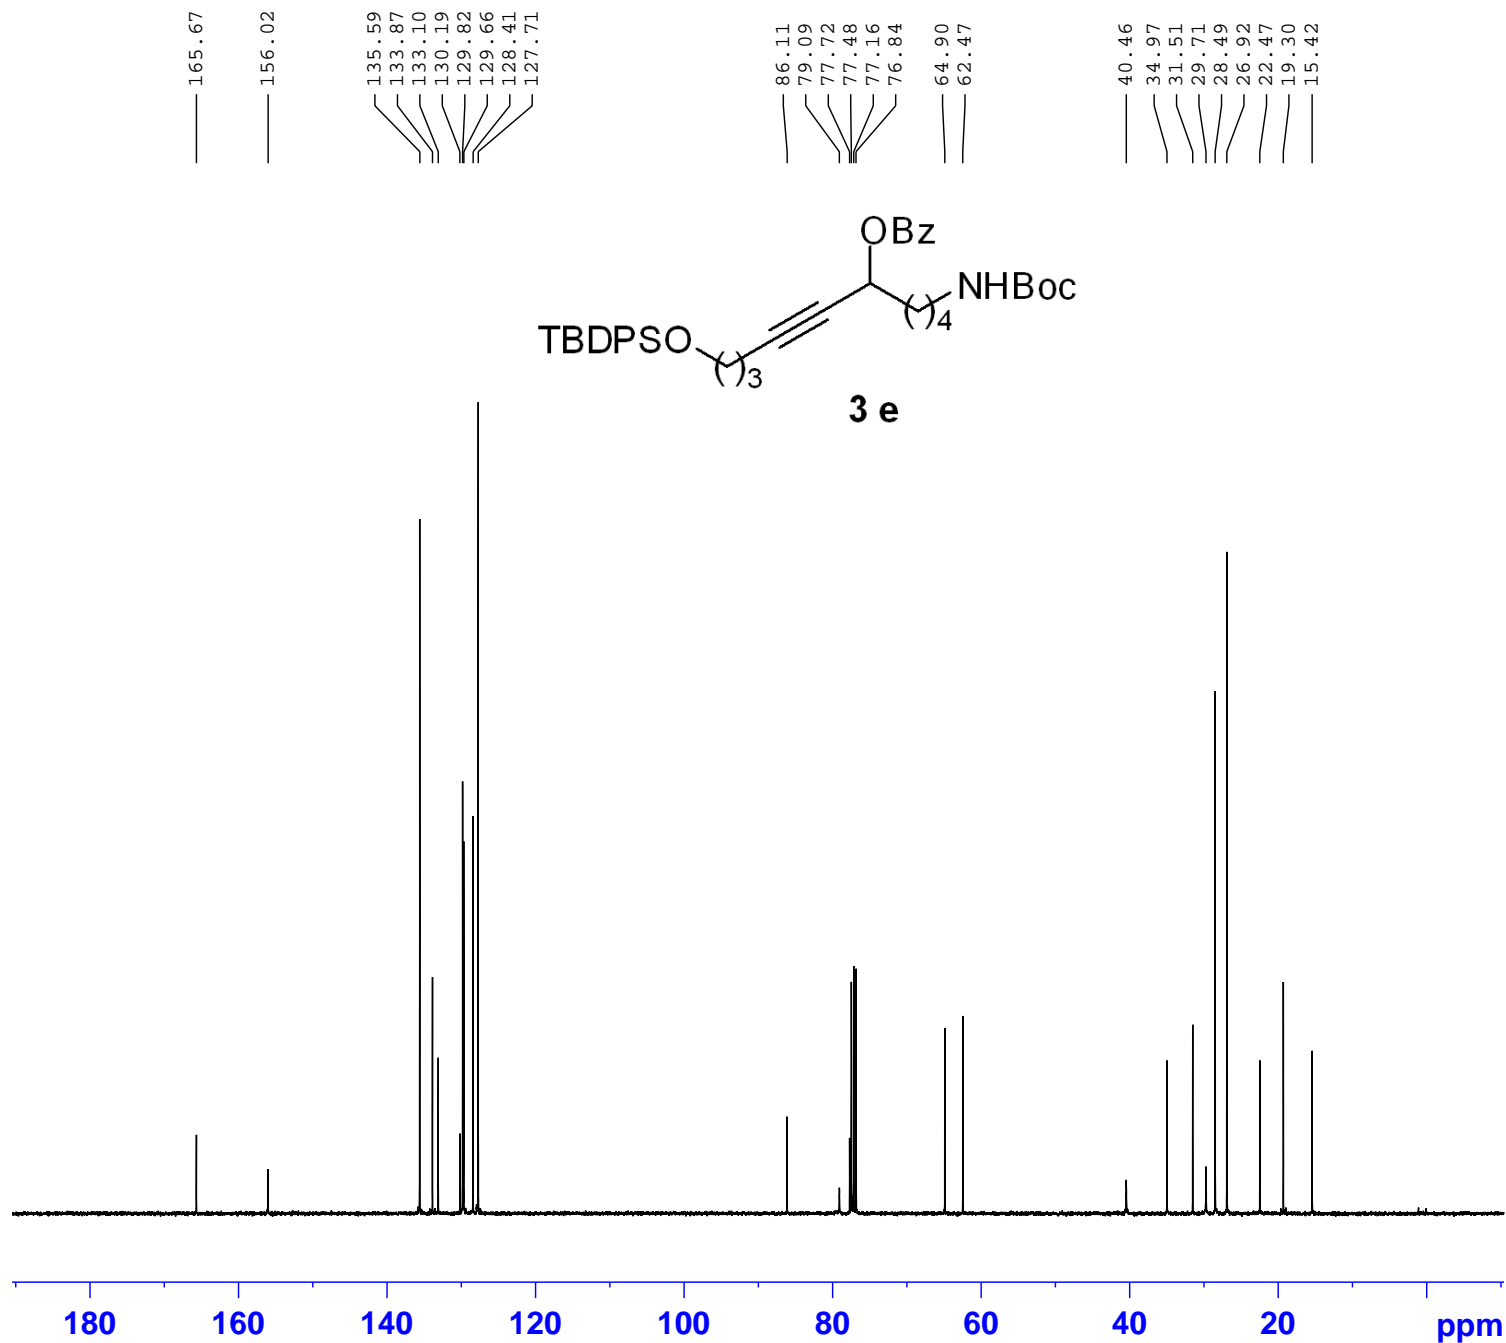

Current Data Parameters  
NAME 2009-11-24 HX-1-138  
EXPNO 2  
PROCNO 1

F2 - Acquisition Parameters  
Date\_ 20091124  
Time 18.49  
INSTRUM spect  
PROBHD 5 mm PABBO BB-  
PULPROG zgpg30  
TD 65536  
SOLVENT CDC13  
NS 512  
DS 0  
SWH 24038.461 Hz  
FIDRES 0.366798 Hz  
AQ 1.3631988 sec  
RG 181  
DW 20.800 usec  
DE 6.50 usec  
TE 297.7 K  
D1 2.0000000 sec  
d11 0.03000000 sec  
DELTA 1.89999998 sec  
TD0 1

==== CHANNEL f1 =====  
NUC1 13C  
P1 15.50 usec  
PL1 -1.00 dB  
SFO1 100.6228298 MHz

==== CHANNEL f2 =====  
CPDPRG2 waltz16  
NUC2 1H  
PCPD2 60.00 usec  
PL12 11.35 dB  
PL13 13.05 dB  
PL2 -2.00 dB  
SFO2 400.1316005 MHz

F2 - Processing parameters  
SI 32768  
SF 100.6127648 MHz  
WDW EM  
SSB 0  
LB 0.60 Hz  
GB 0  
PC 1.40

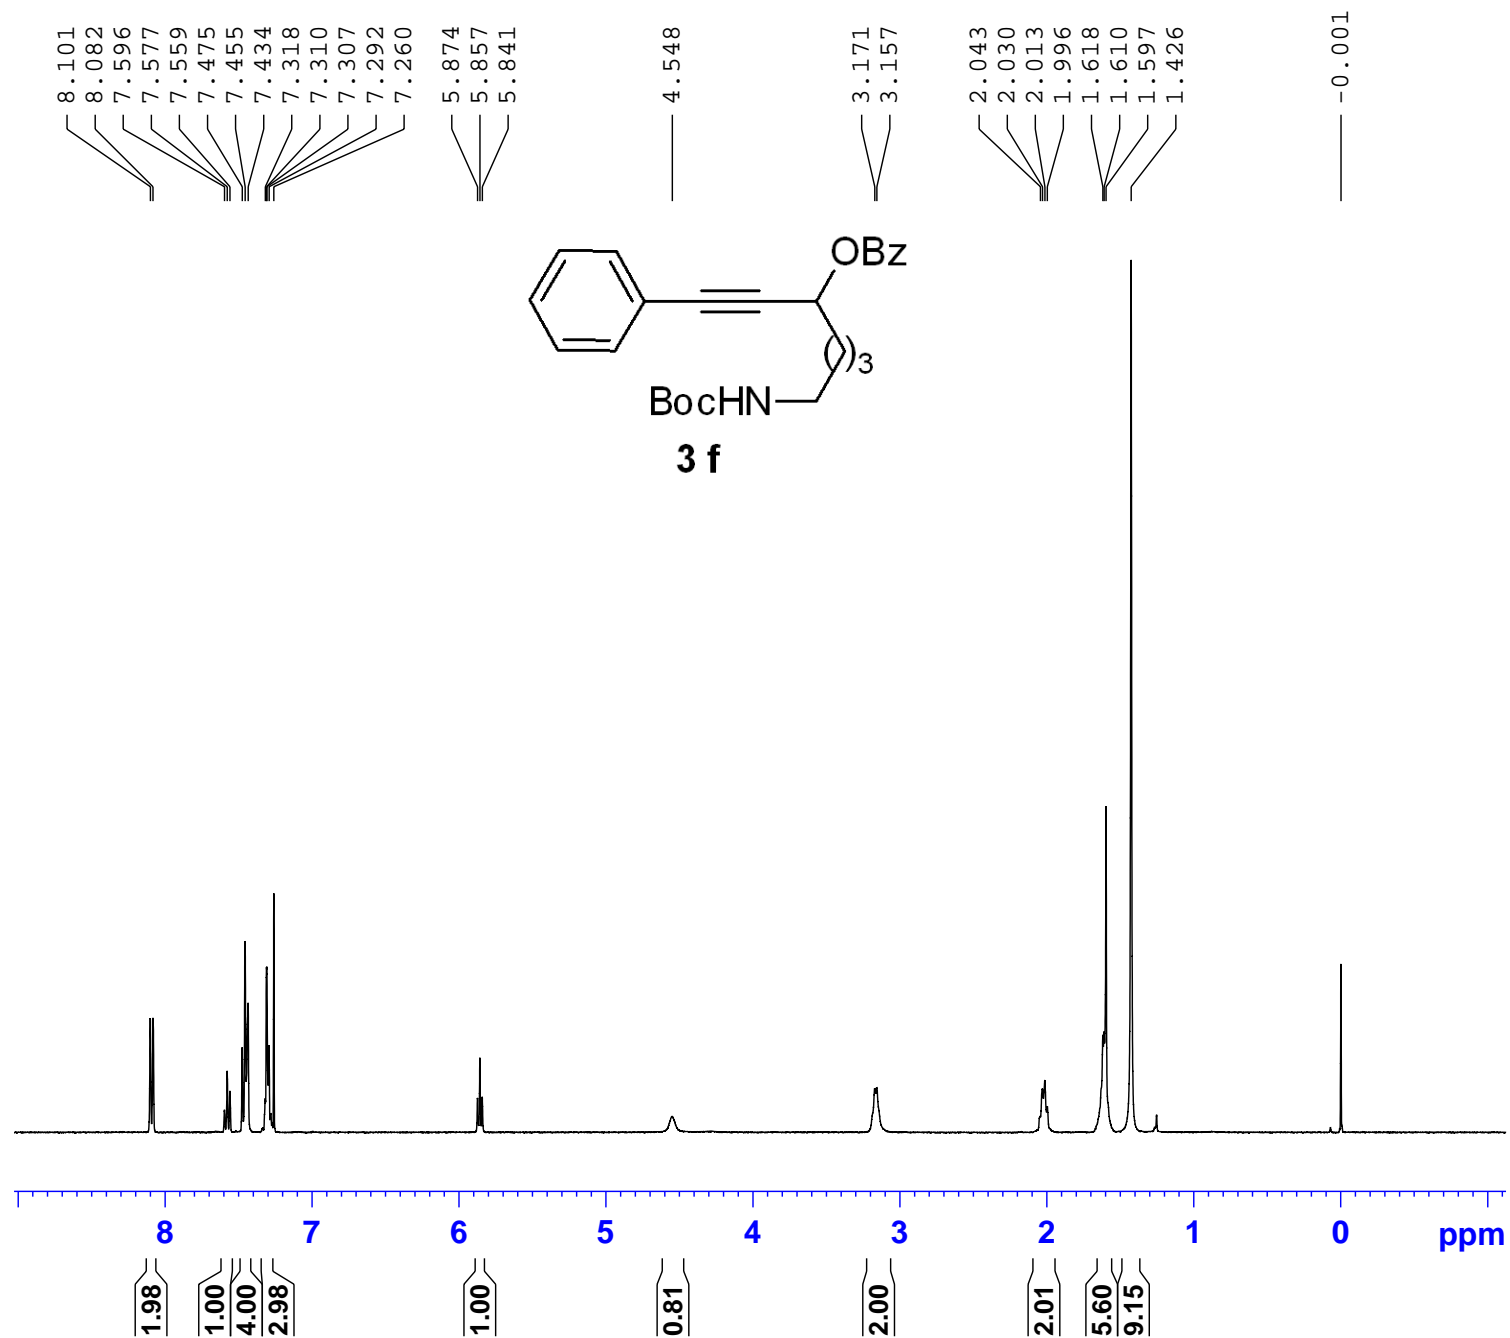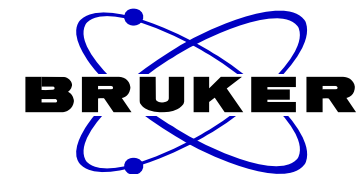

Current Data Parameters

NAME Nov09-2009 HX 1-45  
 EXPNO 5  
 PROCNO 1

F2 - Acquisition Parameters

Date\_ 20091110  
 Time 1.31  
 INSTRUM spect  
 PROBHD 5 mm PABBO BB-  
 PULPROG zg30  
 TD 65536  
 SOLVENT CDCl3  
 NS 8  
 DS 0  
 SWH 8223.685 Hz  
 FIDRES 0.125483 Hz  
 AQ 3.9846387 sec  
 RG 322  
 DW 60.800 usec  
 DE 6.50 usec  
 TE 296.3 K  
 D1 1.00000000 sec  
 TD0 1

==== CHANNEL f1 =====

NUC1 1H  
 P1 12.00 usec  
 PL1 -2.00 dB  
 SFO1 400.1324710 MHz

F2 - Processing parameters

SI 32768  
 SF 400.1300096 MHz  
 WDW GM  
 SSB 0  
 LB -0.20 Hz  
 GB 0.1  
 PC 1.00

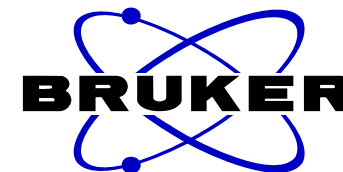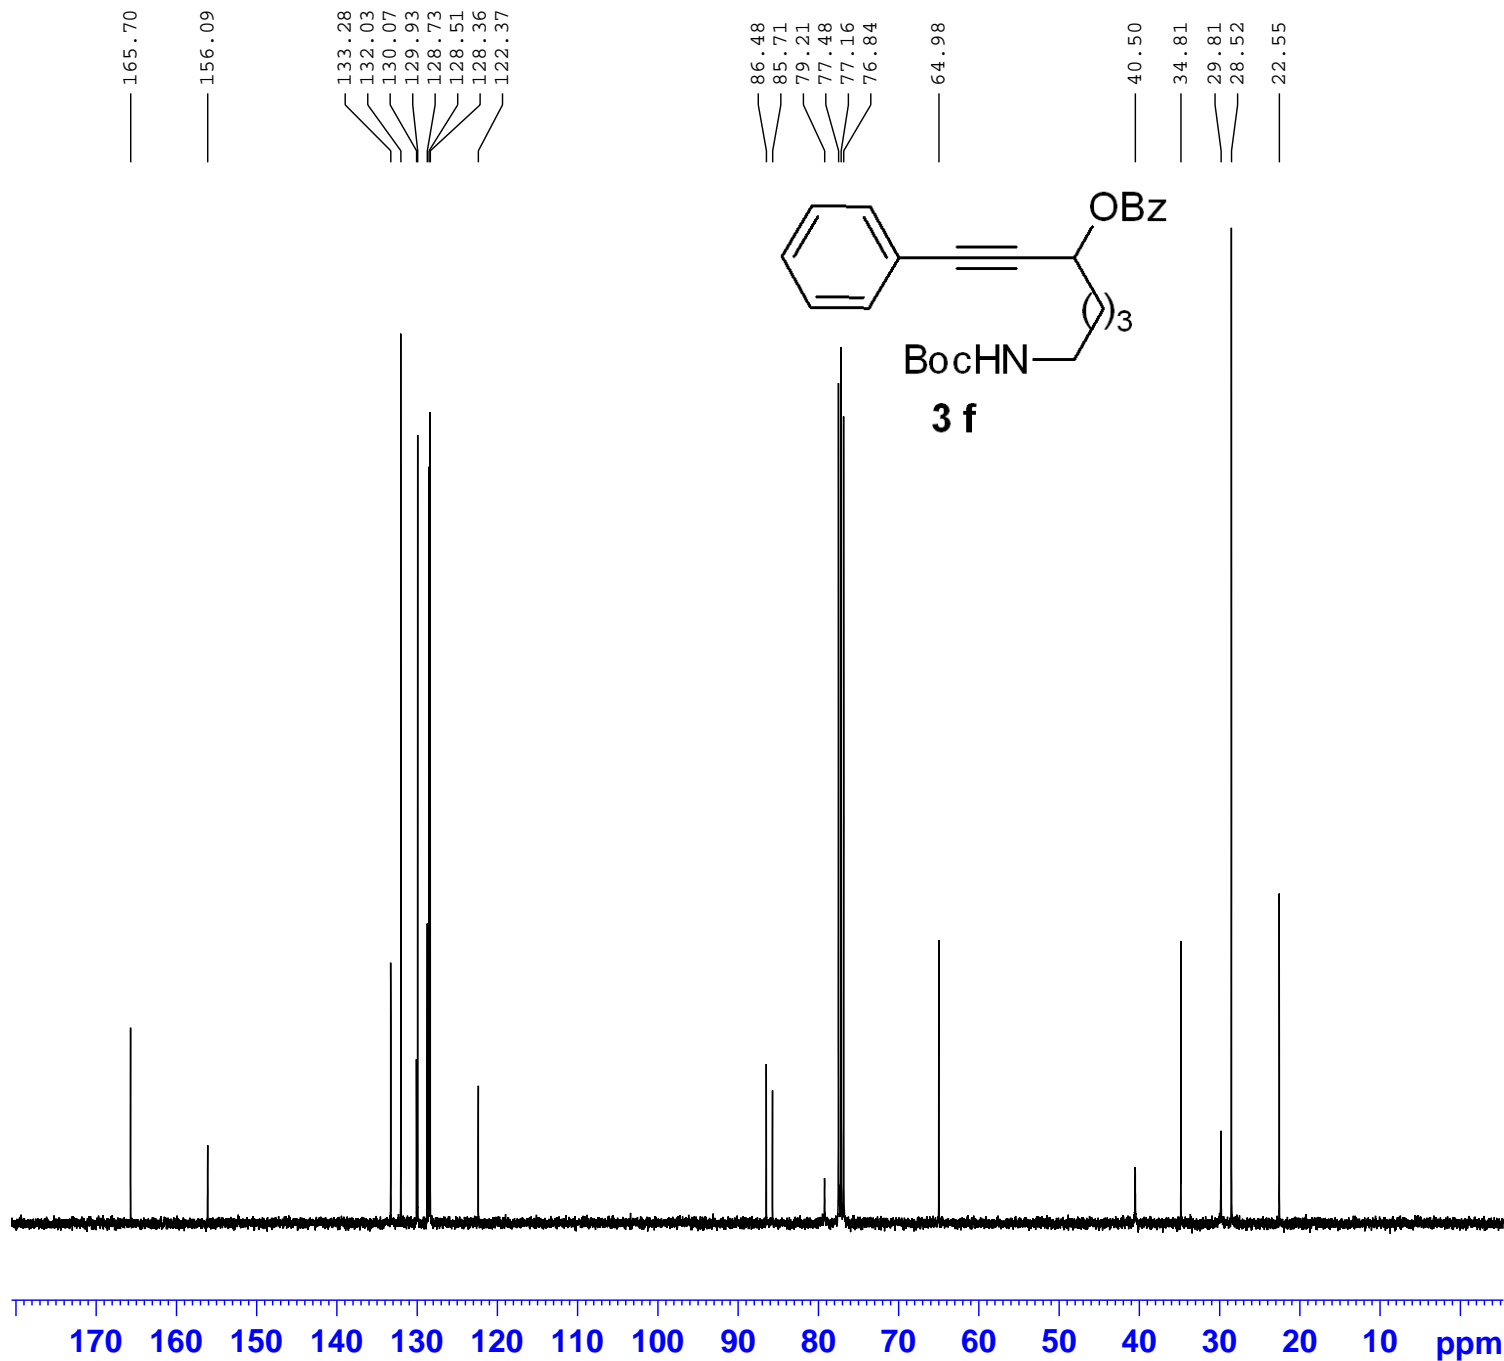

Current Data Parameters  
 NAME 2009-09-30 HX 1-45  
 EXPNO 1  
 PROCNO 1

F2 - Acquisition Parameters  
 Date\_ 20090710  
 Time 0.57  
 INSTRUM spect  
 PROBHD 5 mm PABBO BB-  
 PULPROG zgpg30  
 TD 65536  
 SOLVENT CDCl3  
 NS 512  
 DS 0  
 SWH 24038.461 Hz  
 FIDRES 0.366798 Hz  
 AQ 1.3631988 sec  
 RG 181  
 DW 20.800 usec  
 DE 6.50 usec  
 TE 297.2 K  
 D1 2.0000000 sec  
 d11 0.0300000 sec  
 DELTA 1.89999998 sec  
 TD0 1

==== CHANNEL f1 =====  
 NUC1 13C  
 P1 15.50 usec  
 PL1 -1.00 dB  
 SFO1 100.6228298 MHz

==== CHANNEL f2 =====  
 CPDPRG2 waltz16  
 NUC2 1H  
 PCPD2 60.00 usec  
 PL12 11.35 dB  
 PL13 13.05 dB  
 PL2 -2.00 dB  
 SFO2 400.1316005 MHz

F2 - Processing parameters  
 SI 32768  
 SF 100.6127583 MHz  
 WDW EM  
 SSB 0  
 LB 0.60 Hz  
 GB 0  
 PC 1.40

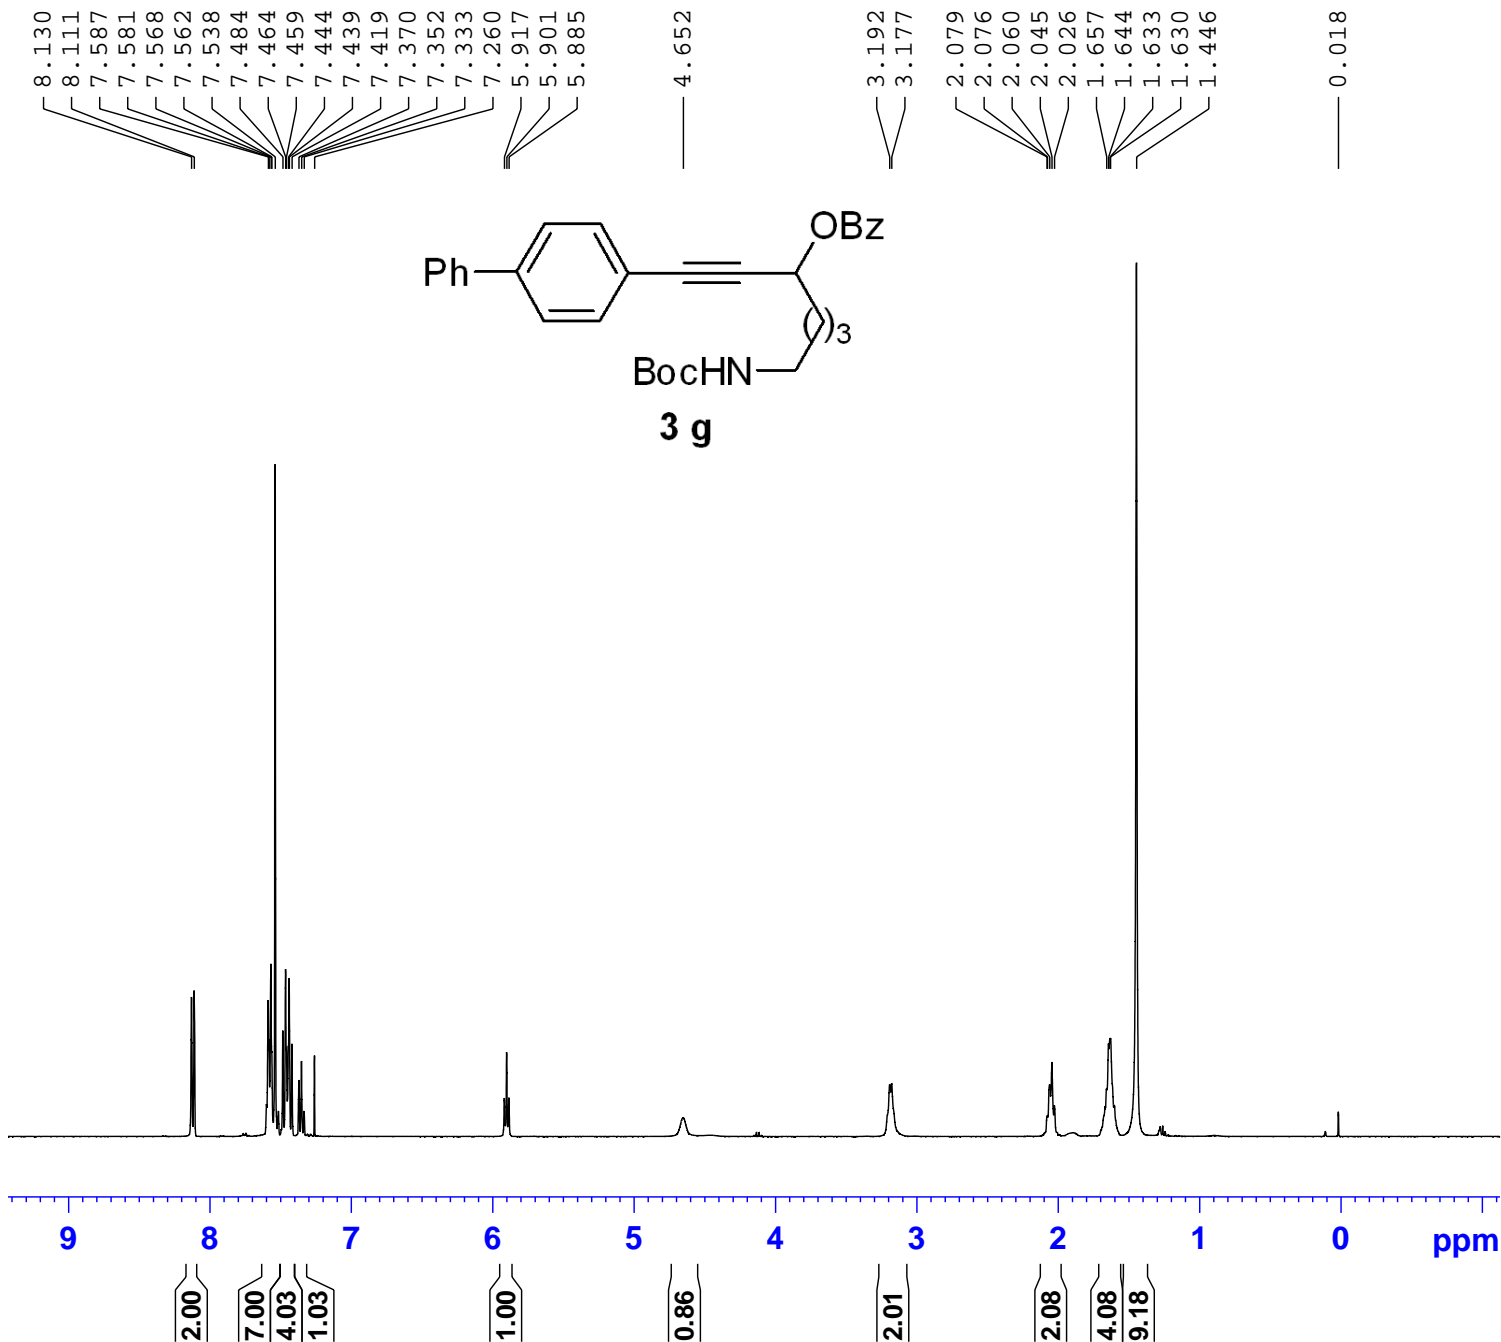

Current Data Parameters  
 NAME Nov03-2009  
 EXPNO 6  
 PROCNO 1

F2 - Acquisition Parameters  
 Date\_ 20091104  
 Time 1.36  
 INSTRUM spect  
 PROBHD 5 mm PABBO BB-  
 PULPROG zg30  
 TD 65536  
 SOLVENT CDC13  
 NS 8  
 DS 0  
 SWH 8223.685 Hz  
 FIDRES 0.125483 Hz  
 AQ 3.9846387 sec  
 RG 50.8  
 DW 60.800 usec  
 DE 6.50 usec  
 TE 296.2 K  
 D1 1.00000000 sec  
 TD0 1

===== CHANNEL f1 =====  
 NUC1 1H  
 P1 12.00 usec  
 PL1 -2.00 dB  
 SFO1 400.1324710 MHz

F2 - Processing parameters  
 SI 32768  
 SF 400.1300091 MHz  
 WDW GM  
 SSB 0  
 LB -0.20 Hz  
 GB 0.1  
 PC 1.00

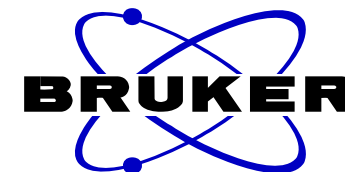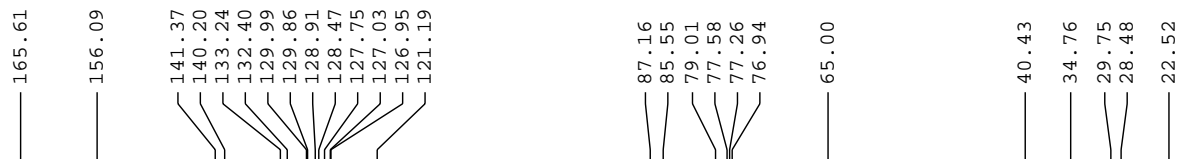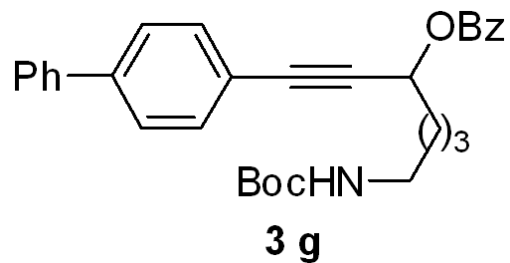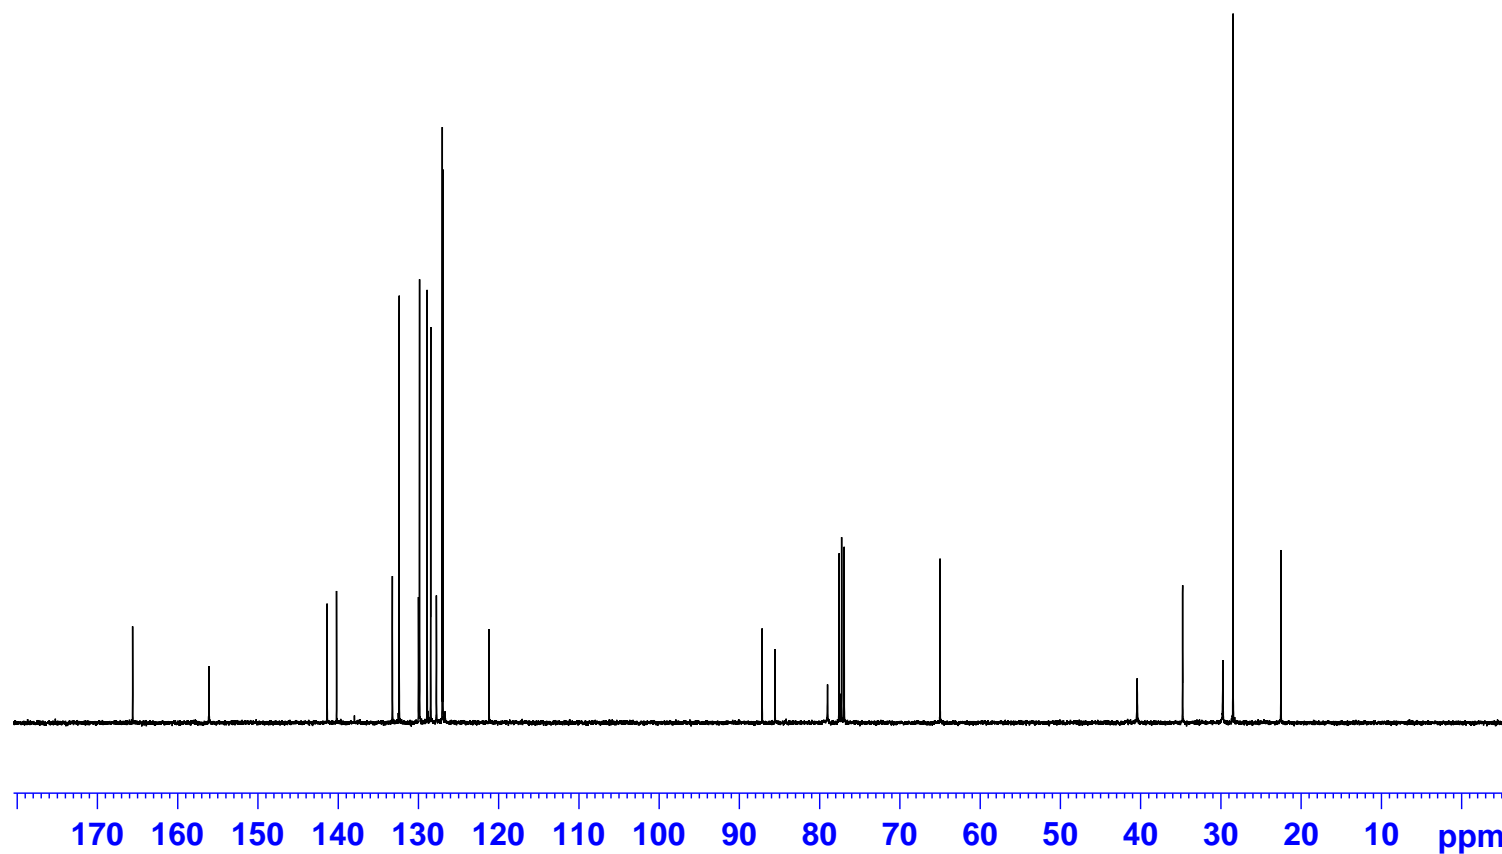

Current Data Parameters  
 NAME Nov09-2009 HJF 4-46  
 EXPNO 13  
 PROCNO 1

F2 - Acquisition Parameters  
 Date\_ 20091110  
 Time 2.32  
 INSTRUM spect  
 PROBHD 5 mm PABBO BB-  
 PULPROG zgpg30  
 TD 65536  
 SOLVENT CDCl3  
 NS 128  
 DS 0  
 SWH 24038.461 Hz  
 FIDRES 0.366798 Hz  
 AQ 1.3631988 sec  
 RG 2050  
 DW 20.800 usec  
 DE 6.50 usec  
 TE 297.2 K  
 D1 2.0000000 sec  
 d11 0.0300000 sec  
 DELTA 1.89999998 sec  
 TD0 1

==== CHANNEL f1 =====  
 NUC1 13C  
 P1 15.50 usec  
 PL1 -1.00 dB  
 SFO1 100.6228298 MHz

==== CHANNEL f2 =====  
 CPDPRG2 waltz16  
 NUC2 1H  
 PCPD2 60.00 usec  
 PL12 11.35 dB  
 PL13 13.05 dB  
 PL2 -2.00 dB  
 SFO2 400.1316005 MHz

F2 - Processing parameters  
 SI 32768  
 SF 100.6127688 MHz  
 WDW EM  
 SSB 0  
 LB 0.60 Hz  
 GB 0  
 PC 1.40

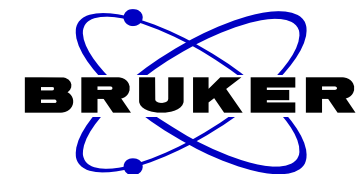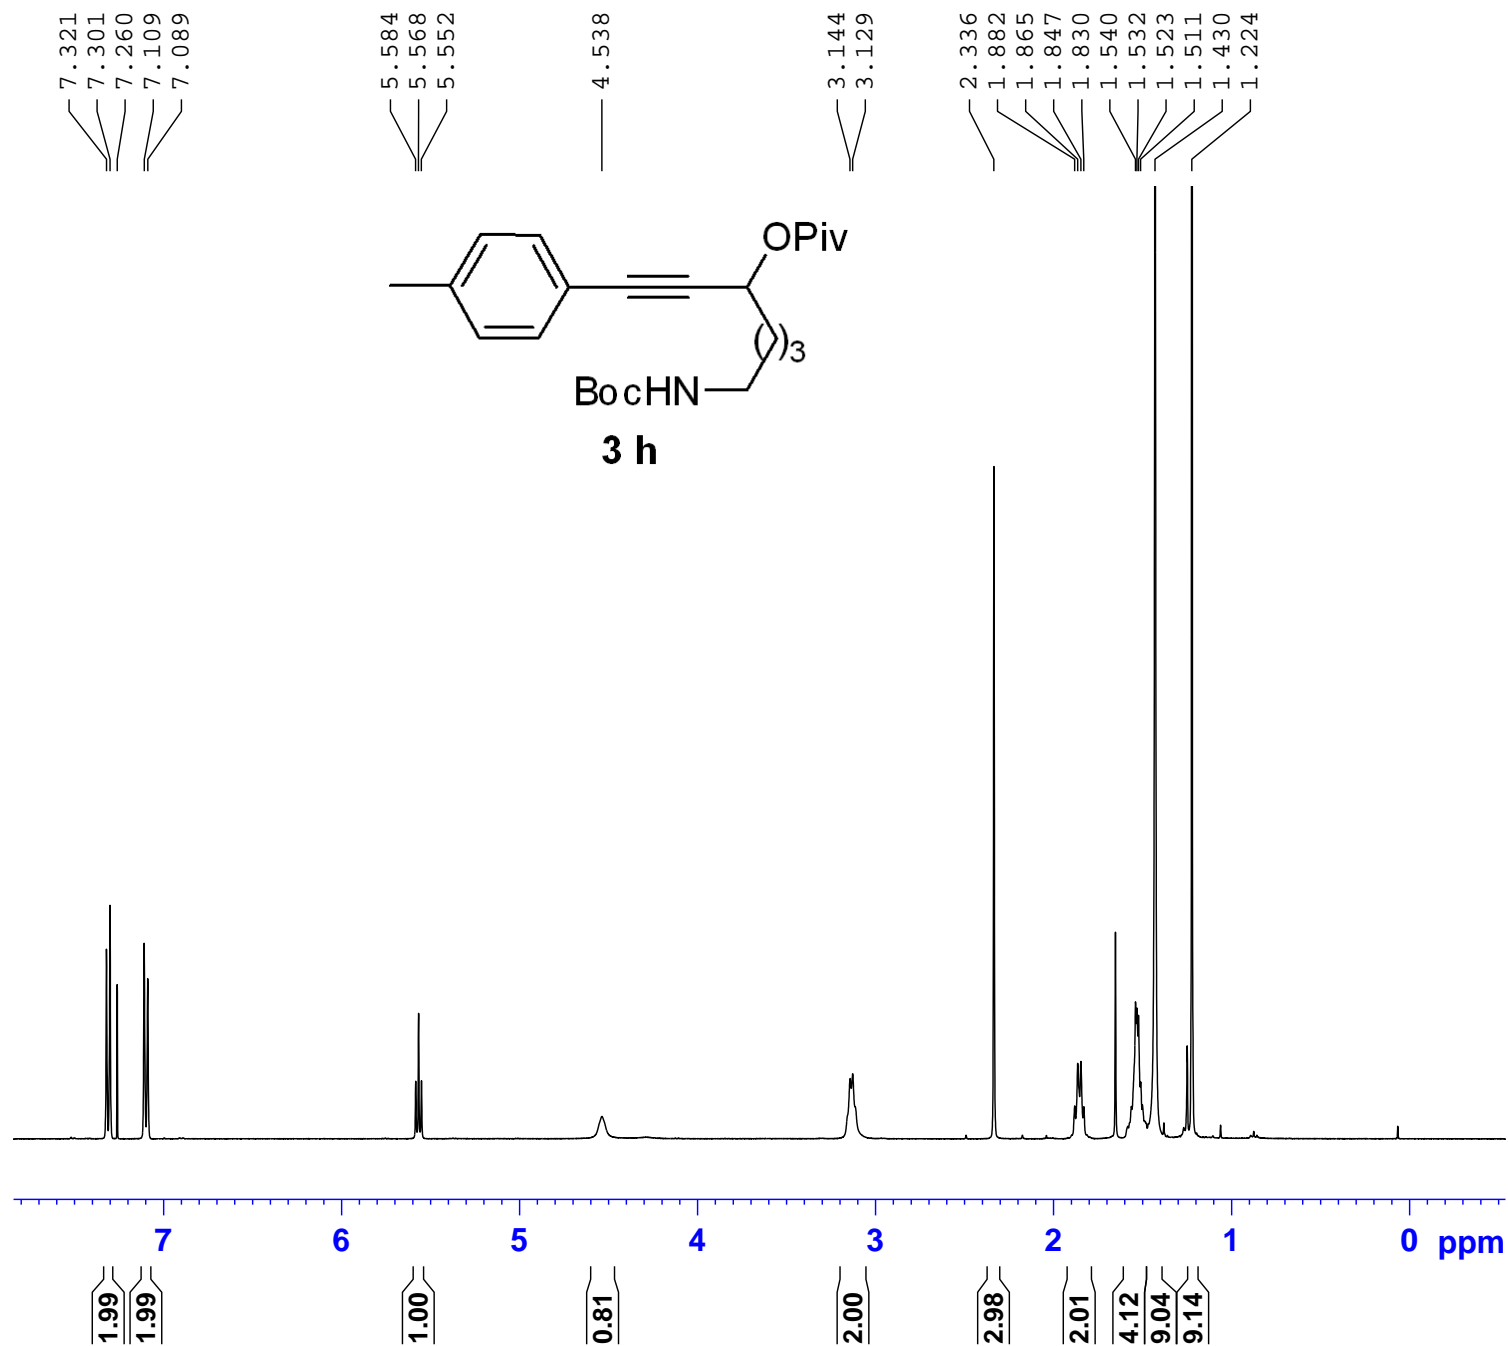

Current Data Parameters  
 NAME Jul03-2009 HJF 3-131  
 EXPNO 10  
 PROCNO 1

F2 - Acquisition Parameters  
 Date\_ 20090704  
 Time 1.04  
 INSTRUM spect  
 PROBHD 5 mm PABBO BB-  
 PULPROG zg30  
 TD 65536  
 SOLVENT CDC13  
 NS 16  
 DS 0  
 SWH 8223.685 Hz  
 FIDRES 0.125483 Hz  
 AQ 3.9846387 sec  
 RG 114  
 DW 60.800 usec  
 DE 6.50 usec  
 TE 295.9 K  
 D1 1.00000000 sec  
 TD0 1

===== CHANNEL f1 =====  
 NUC1 1H  
 P1 12.00 usec  
 PL1 -2.00 dB  
 SFO1 400.1324710 MHz

F2 - Processing parameters  
 SI 32768  
 SF 400.1300093 MHz  
 WDW GM  
 SSB 0  
 LB -0.20 Hz  
 GB 0.1  
 PC 1.00

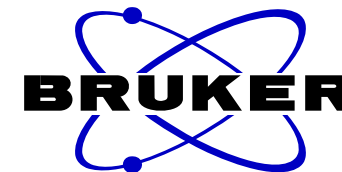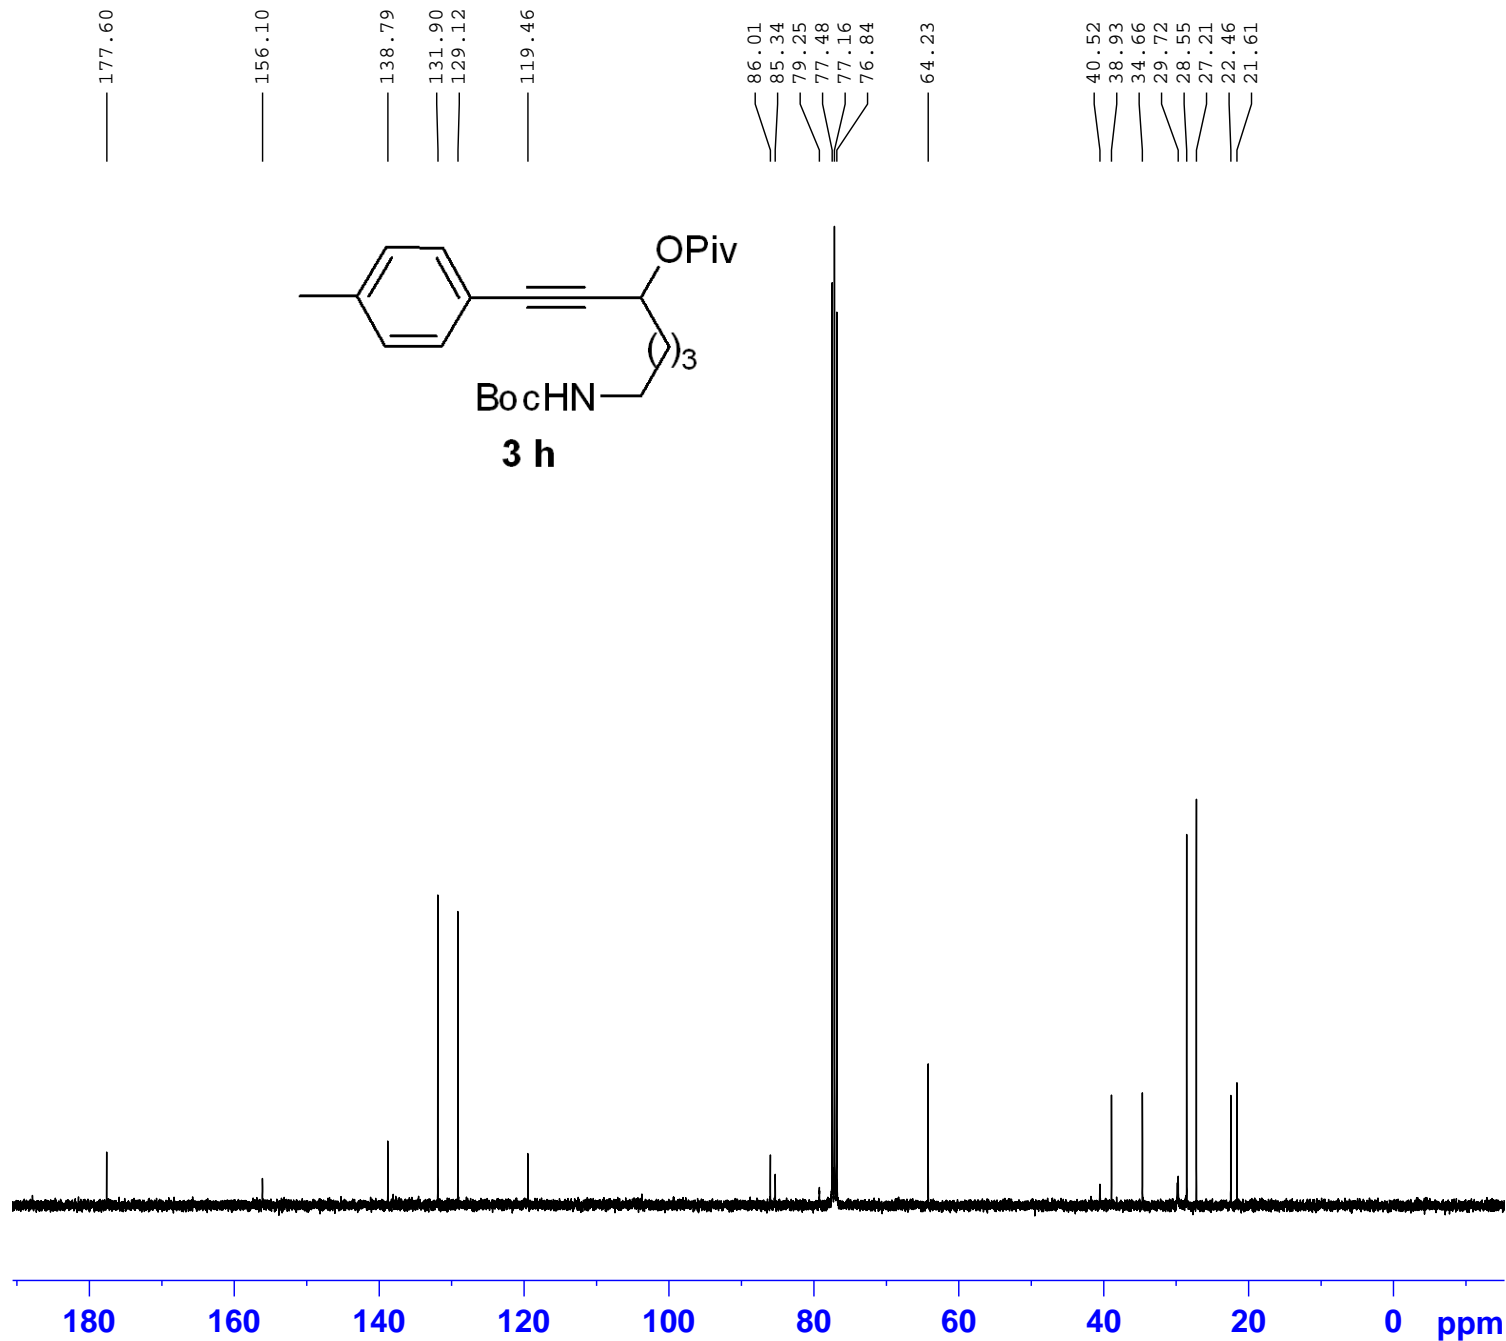

Current Data Parameters  
 NAME 2009-07-09 HJF 3-131  
 EXPNO 1  
 PROCNO 1

F2 - Acquisition Parameters  
 Date\_ 20090709  
 Time 23.08  
 INSTRUM spect  
 PROBHD 5 mm PABBO BB-  
 PULPROG zgpg30  
 TD 65536  
 SOLVENT CDC13  
 NS 512  
 DS 0  
 SWH 24038.461 Hz  
 FIDRES 0.366798 Hz  
 AQ 1.3631988 sec  
 RG 181  
 DW 20.800 usec  
 DE 6.50 usec  
 TE 297.1 K  
 D1 2.00000000 sec  
 d11 0.03000000 sec  
 DELTA 1.89999998 sec  
 TD0 1

==== CHANNEL f1 =====  
 NUC1 13C  
 P1 15.50 usec  
 PL1 -1.00 dB  
 SFO1 100.6228298 MHz

==== CHANNEL f2 =====  
 CPDPRG2 waltz16  
 NUC2 1H  
 PCPD2 60.00 usec  
 PL12 11.35 dB  
 PL13 13.05 dB  
 PL2 -2.00 dB  
 SFO2 400.1316005 MHz

F2 - Processing parameters  
 SI 32768  
 SF 100.6127553 MHz  
 WDW EM  
 SSB 0  
 LB 0.60 Hz  
 GB 0  
 PC 1.40



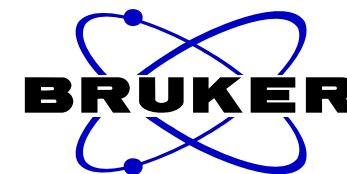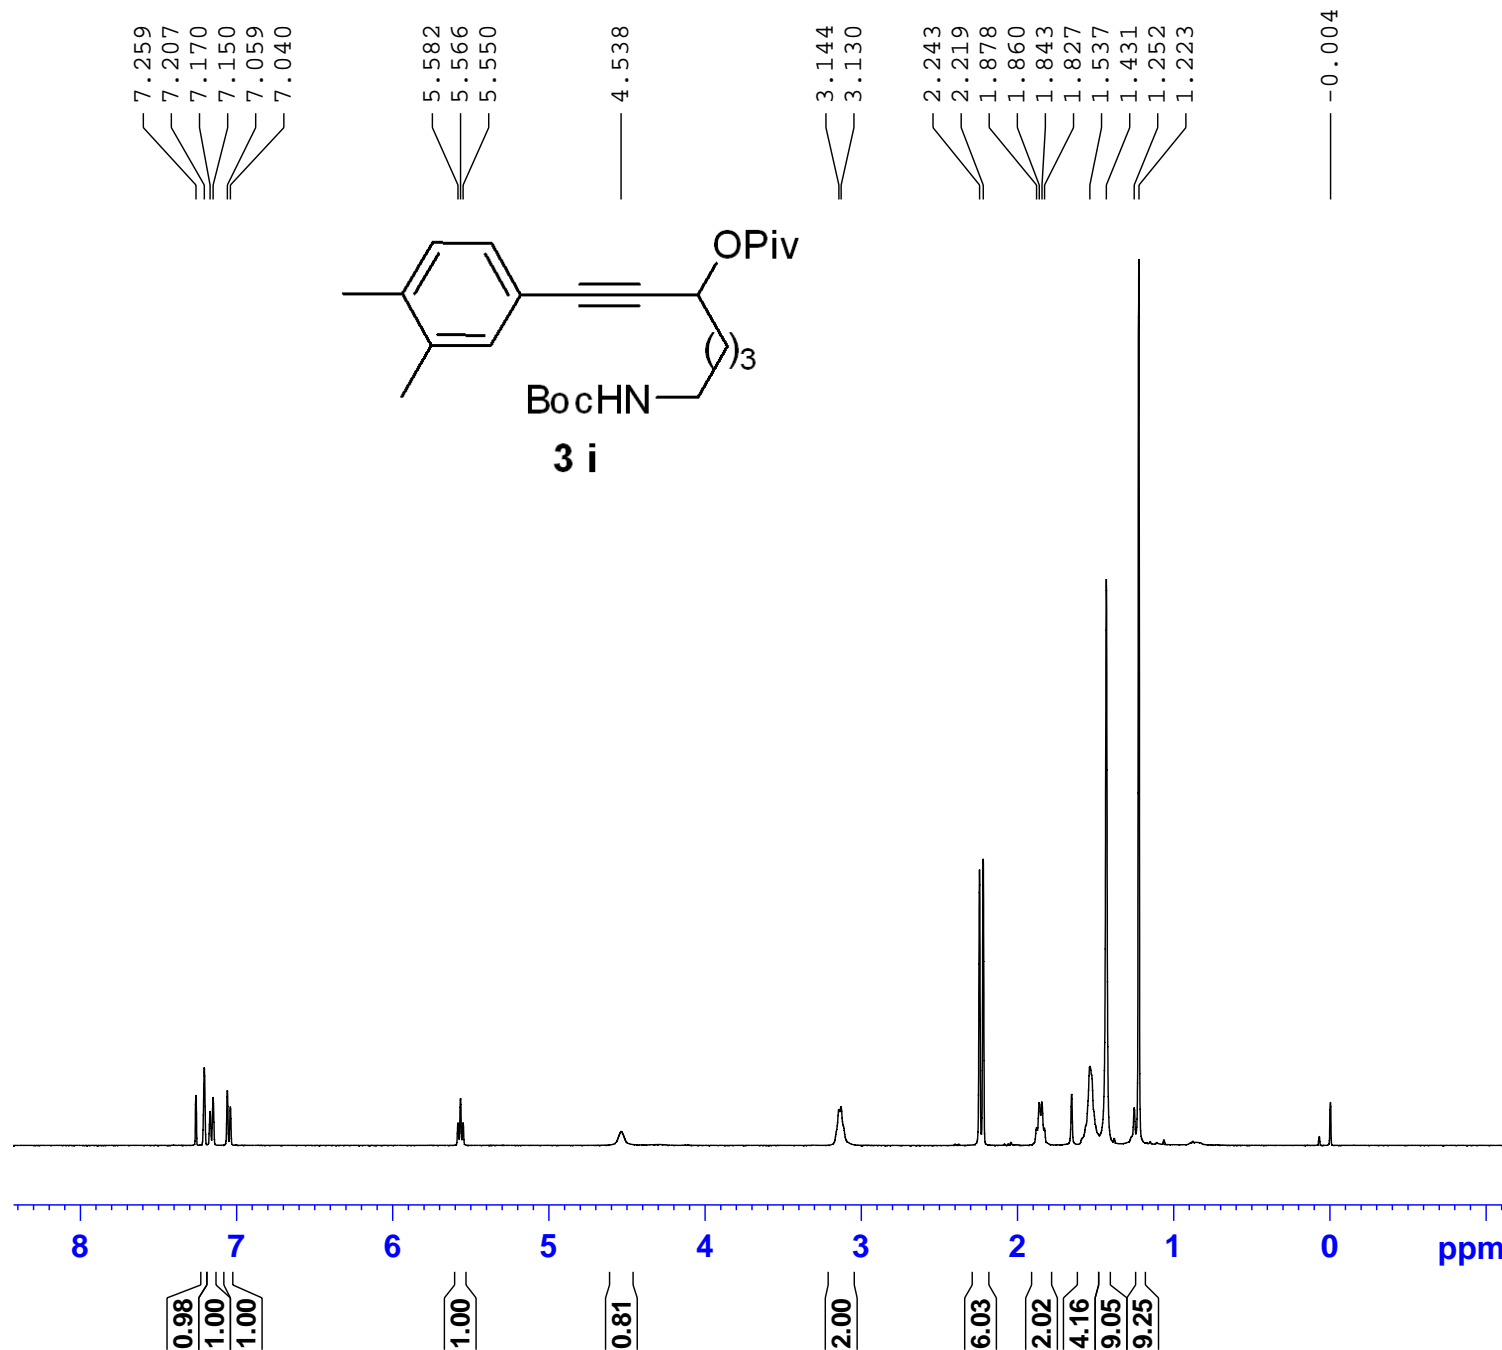

Current Data Parameters  
 NAME Nov26-2009 HJF 4-4  
 EXPNO 14  
 PROCNO 1

F2 - Acquisition Parameters  
 Date\_ 20091127  
 Time 2.16  
 INSTRUM spect  
 PROBHD 5 mm PABBO BB-  
 PULPROG zg30  
 TD 65536  
 SOLVENT CDCl3  
 NS 16  
 DS 0  
 SWH 8223.685 Hz  
 FIDRES 0.125483 Hz  
 AQ 3.9846387 sec  
 RG 114  
 DW 60.800 usec  
 DE 6.50 usec  
 TE 295.9 K  
 D1 1.00000000 sec  
 TD0 1

==== CHANNEL f1 =====  
 NUC1 1H  
 P1 12.00 usec  
 PL1 -2.00 dB  
 SFO1 400.1324710 MHz

F2 - Processing parameters  
 SI 32768  
 SF 400.1300094 MHz  
 WDW GM  
 SSB 0  
 LB -0.20 Hz  
 GB 0.1  
 PC 1.00

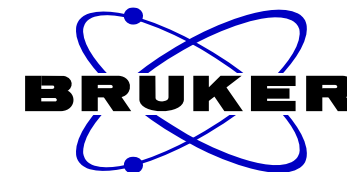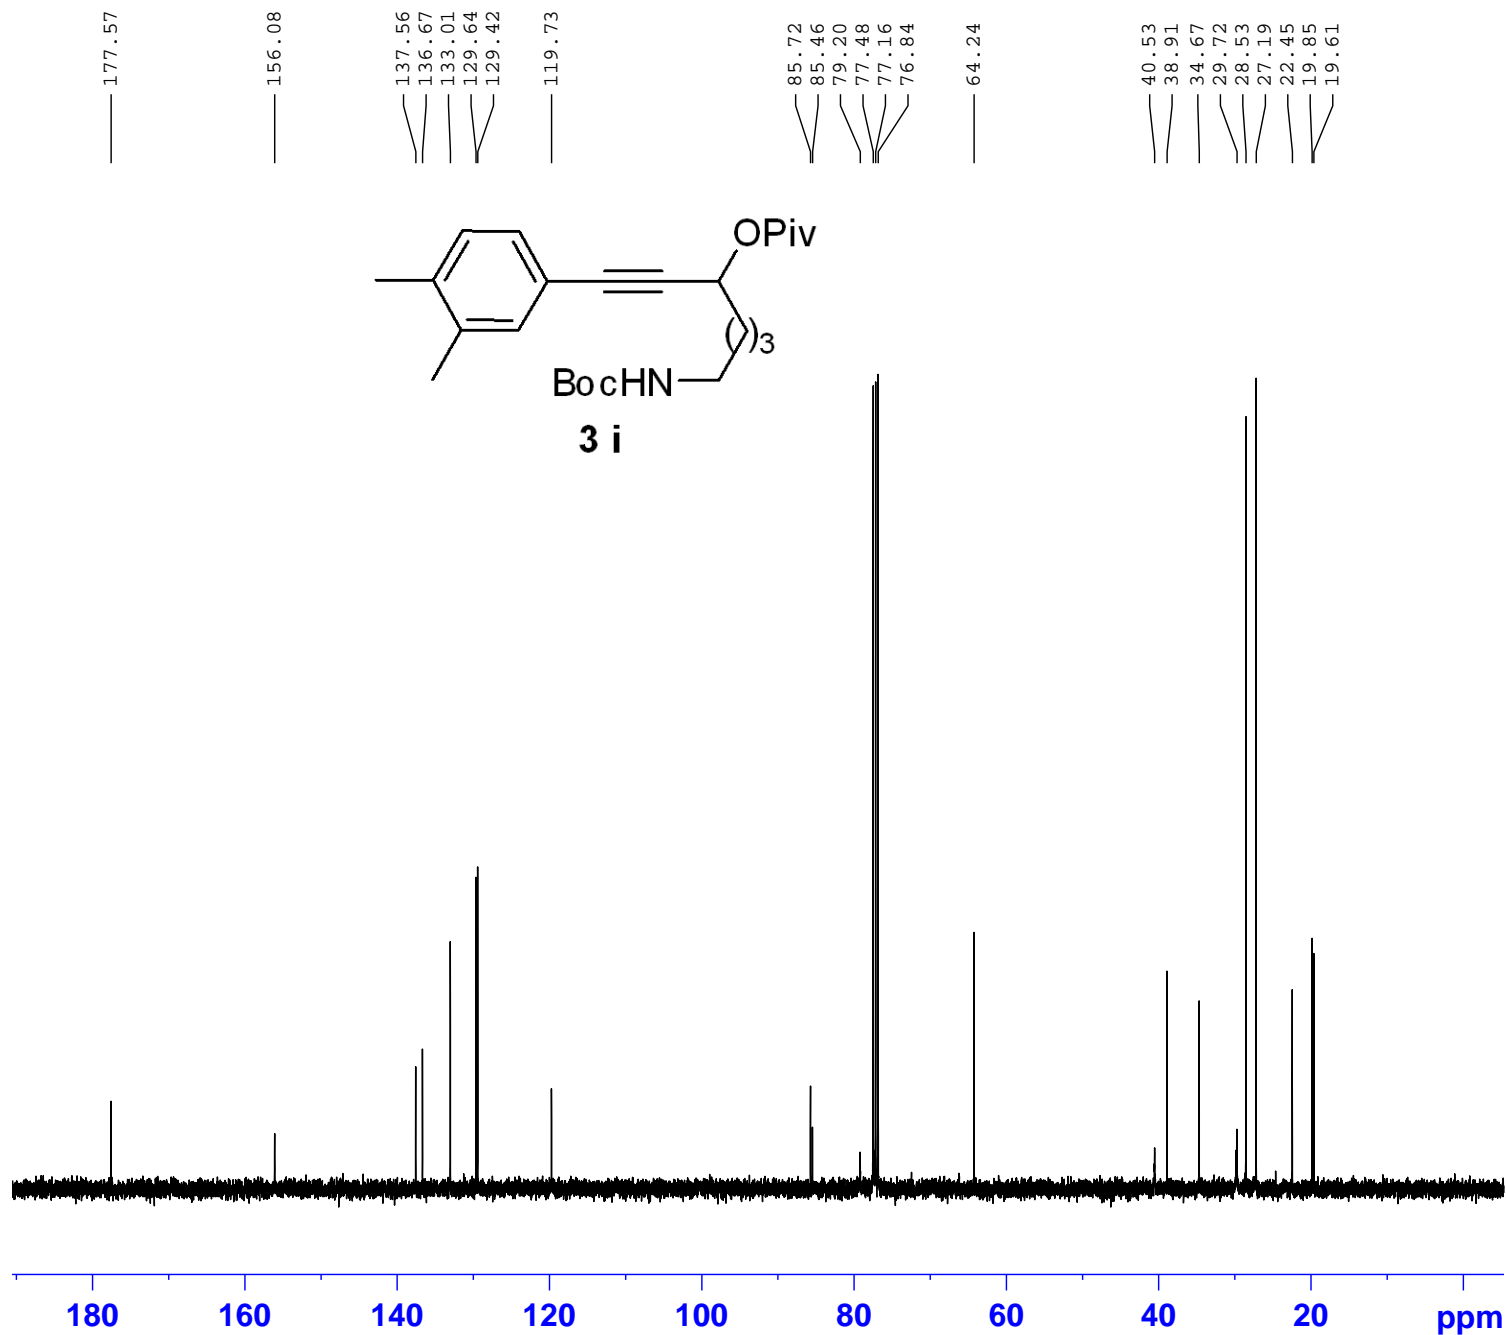

Current Data Parameters  
 NAME Dec01-2009 HJF 4-4  
 EXPNO 9  
 PROCNO 1

F2 - Acquisition Parameters  
 Date\_ 20091202  
 Time 1.56  
 INSTRUM spect  
 PROBHD 5 mm PABBO BB-  
 PULPROG zgpg30  
 TD 65536  
 SOLVENT CDC13  
 NS 128  
 DS 0  
 SWH 24038.461 Hz  
 FIDRES 0.366798 Hz  
 AQ 1.3631988 sec  
 RG 2050  
 DW 20.800 usec  
 DE 6.50 usec  
 TE 297.0 K  
 D1 2.00000000 sec  
 d11 0.03000000 sec  
 DELTA 1.89999998 sec  
 TD0 1

==== CHANNEL f1 =====  
 NUC1 13C  
 P1 15.50 usec  
 PL1 -1.00 dB  
 SFO1 100.6228298 MHz

==== CHANNEL f2 =====  
 CPDPRG2 waltz16  
 NUC2 1H  
 PCPD2 60.00 usec  
 PL12 11.35 dB  
 PL13 13.05 dB  
 PL2 -2.00 dB  
 SFO2 400.1316005 MHz

F2 - Processing parameters  
 SI 32768  
 SF 100.6127573 MHz  
 WDW EM  
 SSB 0  
 LB 0.60 Hz  
 GB 0  
 PC 1.40

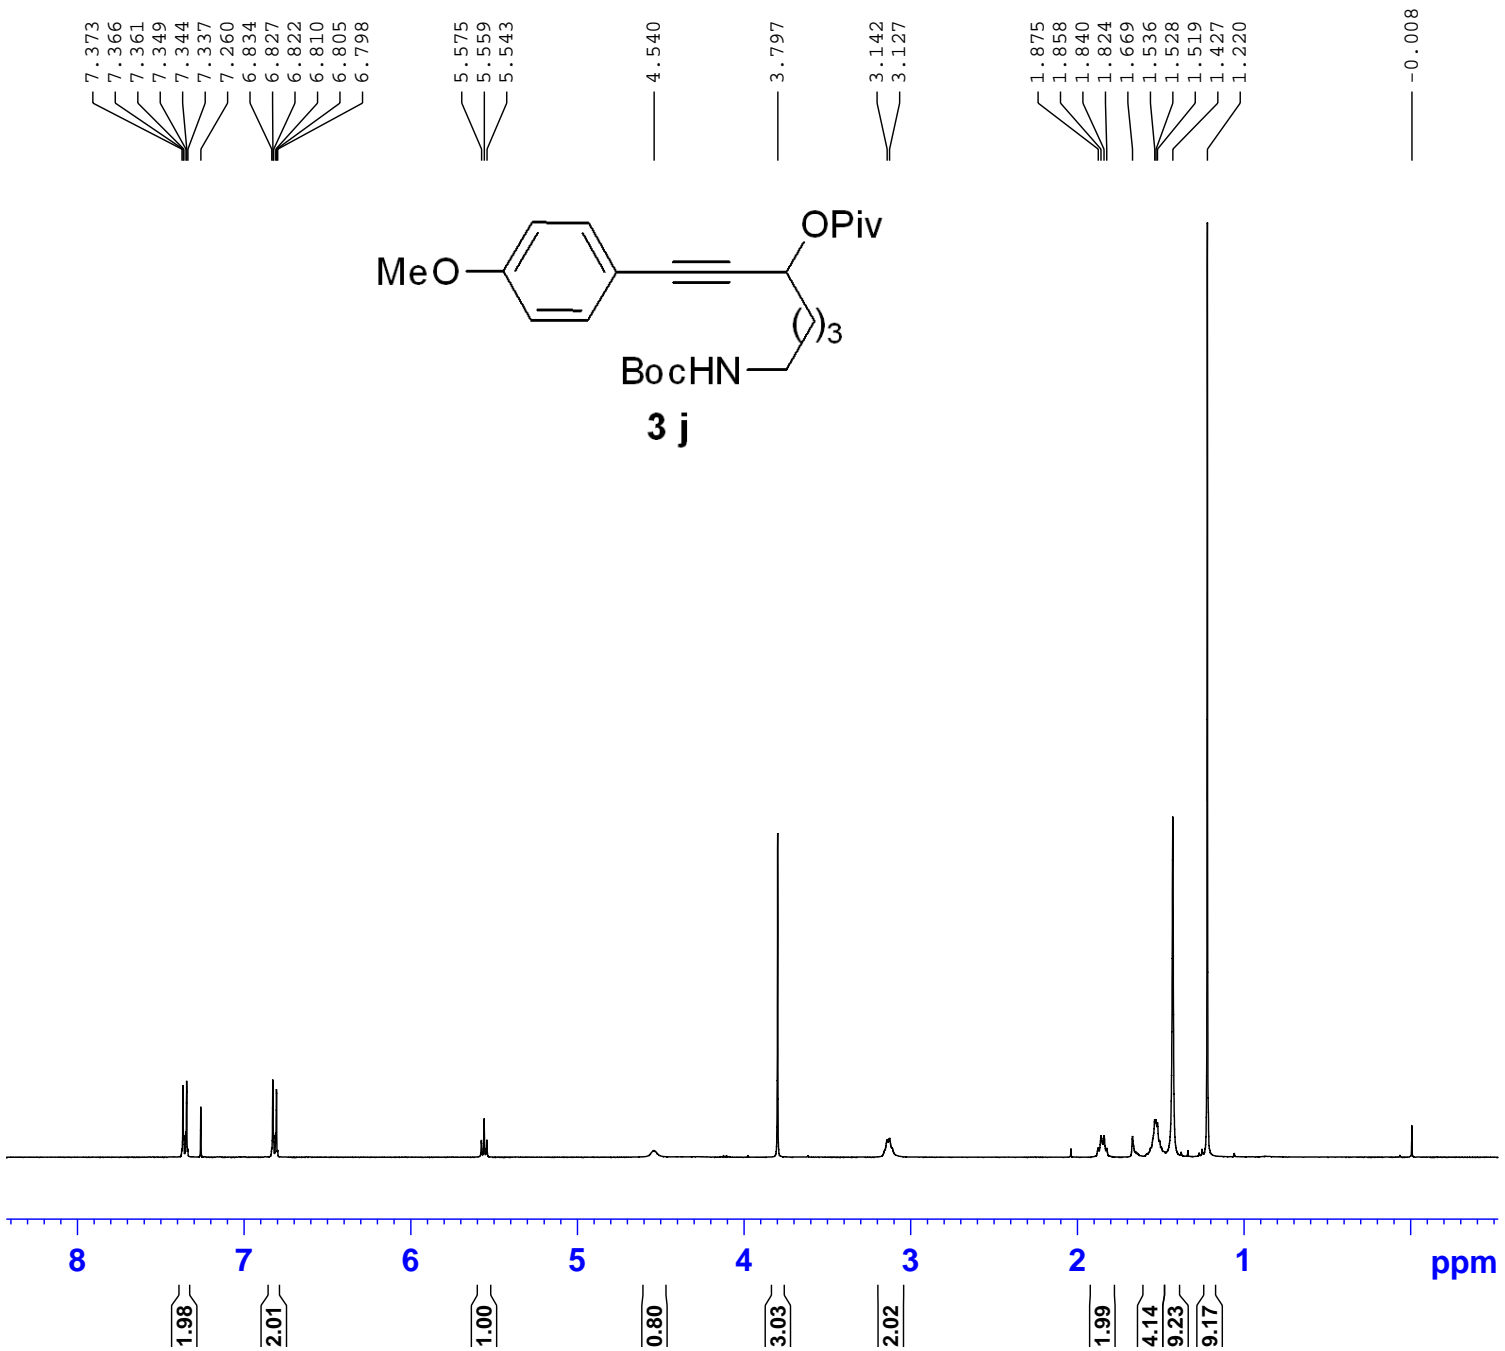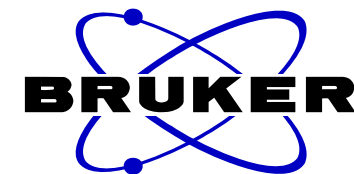

Current Data Parameters  
 NAME Jul29-2009 HJF 3-162  
 EXPNO 13  
 PROCNO 1

F2 - Acquisition Parameters  
 Date\_ 20090730  
 Time 3.07  
 INSTRUM spect  
 PROBHD 5 mm PABBO BB-  
 PULPROG zg30  
 TD 65536  
 SOLVENT CDCl3  
 NS 16  
 DS 0  
 SWH 8223.685 Hz  
 FIDRES 0.125483 Hz  
 AQ 3.9846387 sec  
 RG 128  
 DW 60.800 usec  
 DE 6.50 usec  
 TE 295.4 K  
 D1 1.00000000 sec  
 TD0 1

==== CHANNEL f1 =====  
 NUC1 1H  
 P1 12.00 usec  
 PL1 -2.00 dB  
 SFO1 400.1324710 MHz

F2 - Processing parameters  
 SI 32768  
 SF 400.1300096 MHz  
 WDW GM  
 SSB 0  
 LB -0.20 Hz  
 GB 0.1  
 PC 1.00

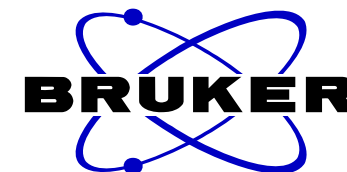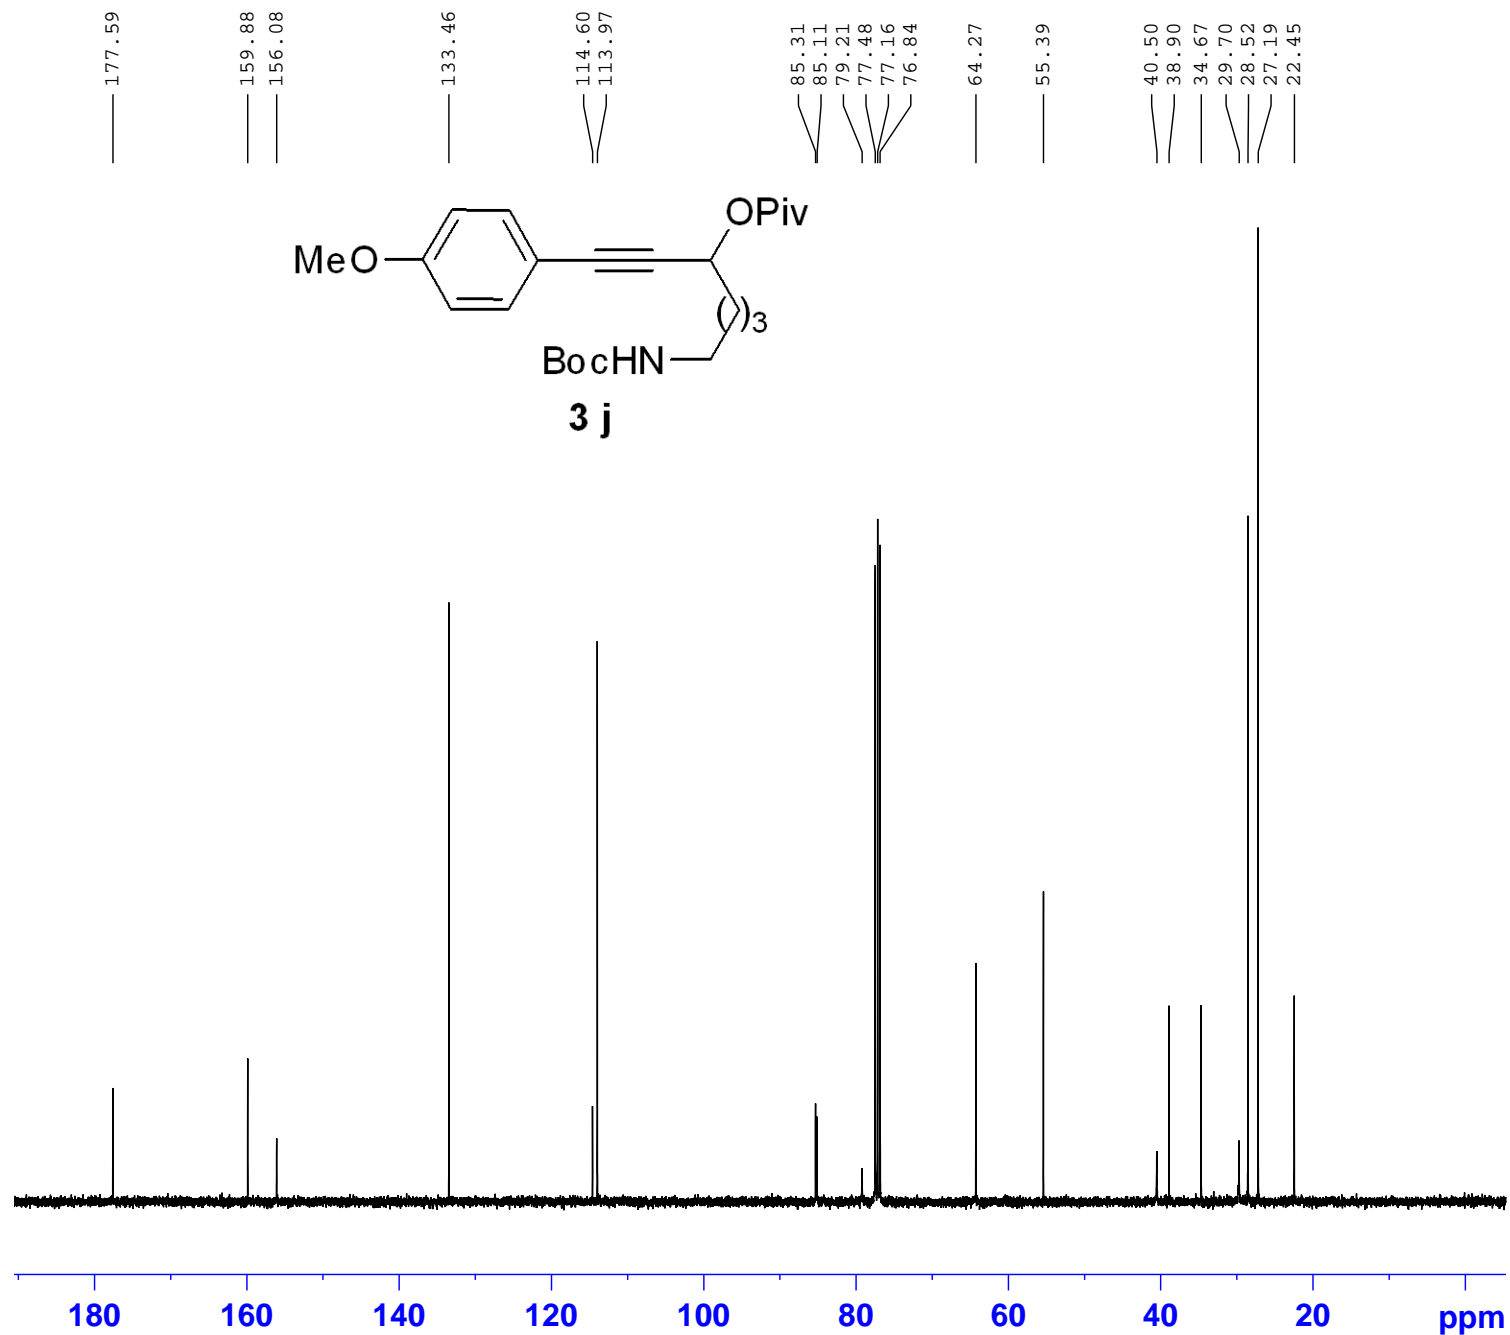

Current Data Parameters  
 NAME 2009-08-07 HJF3-162  
 EXPNO 2  
 PROCNO 1

F2 - Acquisition Parameters  
 Date\_ 20090807  
 Time 17.00  
 INSTRUM spect  
 PROBHD 5 mm PABBO BB-  
 PULPROG zgpg30  
 TD 65536  
 SOLVENT CDC13  
 NS 512  
 DS 0  
 SWH 24038.461 Hz  
 FIDRES 0.366798 Hz  
 AQ 1.3631988 sec  
 RG 181  
 DW 20.800 usec  
 DE 6.50 usec  
 TE 296.6 K  
 D1 2.0000000 sec  
 d11 0.0300000 sec  
 DELTA 1.89999998 sec  
 TD0 1

==== CHANNEL f1 =====  
 NUC1 13C  
 P1 15.50 usec  
 PL1 -1.00 dB  
 SFO1 100.6228298 MHz

==== CHANNEL f2 =====  
 CPDPRG2 waltz16  
 NUC2 1H  
 PCPD2 60.00 usec  
 PL12 11.35 dB  
 PL13 13.05 dB  
 PL2 -2.00 dB  
 SFO2 400.1316005 MHz

F2 - Processing parameters  
 SI 32768  
 SF 100.6127576 MHz  
 WDW EM  
 SSB 0  
 LB 0.60 Hz  
 GB 0  
 PC 1.40

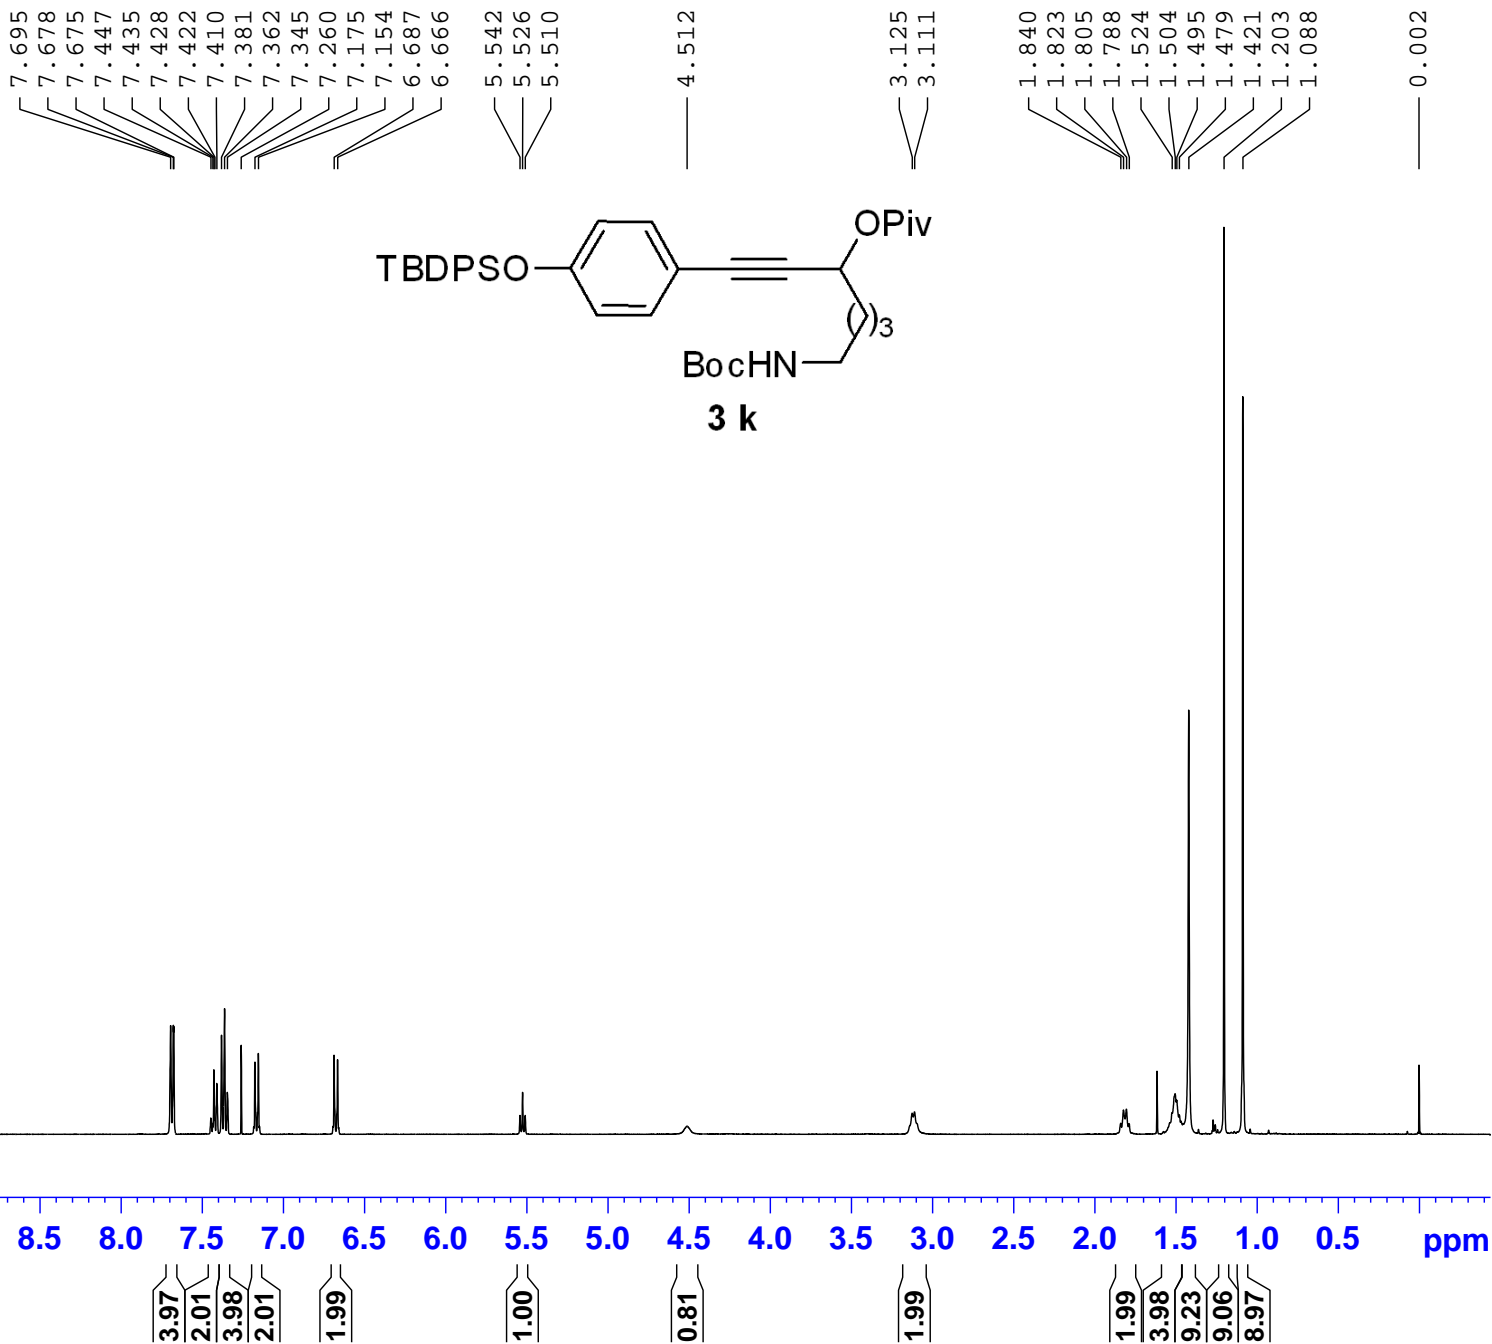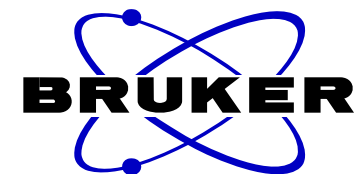

Current Data Parameters  
 NAME Dec15-2009 HJF 4-58  
 EXPNO 21  
 PROCNO 1

F2 - Acquisition Parameters  
 Date\_ 20091216  
 Time 2.28  
 INSTRUM spect  
 PROBHD 5 mm PABBO BB-  
 PULPROG zg30  
 TD 65536  
 SOLVENT CDCl3  
 NS 8  
 DS 0  
 SWH 8223.685 Hz  
 FIDRES 0.125483 Hz  
 AQ 3.9846387 sec  
 RG 128  
 DW 60.800 usec  
 DE 6.50 usec  
 TE 296.4 K  
 D1 1.00000000 sec  
 TD0 1

===== CHANNEL f1 =====  
 NUC1 1H  
 P1 12.00 usec  
 PL1 -2.00 dB  
 SFO1 400.1324710 MHz

F2 - Processing parameters  
 SI 32768  
 SF 400.1300096 MHz  
 WDW GM  
 SSB 0  
 LB -0.20 Hz  
 GB 0.1  
 PC 1.00

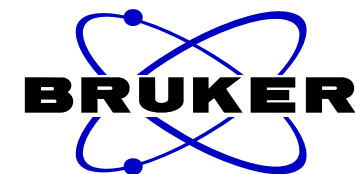

Current Data Parameters  
 NAME Dec25-2009  
 EXPNO 9  
 PROCNO 1

F2 - Acquisition Parameters  
 Date\_ 20091225  
 Time 20.03  
 INSTRUM spect  
 PROBHD 5 mm PABBO BB-  
 PULPROG zgpg30  
 TD 65536  
 SOLVENT CDC13  
 NS 128  
 DS 0  
 SWH 24038.461 Hz  
 FIDRES 0.366798 Hz  
 AQ 1.3631988 sec  
 RG 2050  
 DW 20.800 usec  
 DE 6.50 usec  
 TE 300.0 K  
 D1 2.0000000 sec  
 d11 0.0300000 sec  
 DELTA 1.89999998 sec  
 TD0 1

==== CHANNEL f1 =====  
 NUC1 13C  
 P1 15.50 usec  
 PL1 -1.00 dB  
 SFO1 100.6228298 MHz

==== CHANNEL f2 =====  
 CPDPRG2 waltz16  
 NUC2 1H  
 PCPD2 60.00 usec  
 PL12 11.35 dB  
 PL13 13.05 dB  
 PL2 -2.00 dB  
 SFO2 400.1316005 MHz

F2 - Processing parameters  
 SI 32768  
 SF 100.6127690 MHz  
 WDW EM  
 SSB 0  
 LB 1.00 Hz  
 GB 0  
 PC 1.40

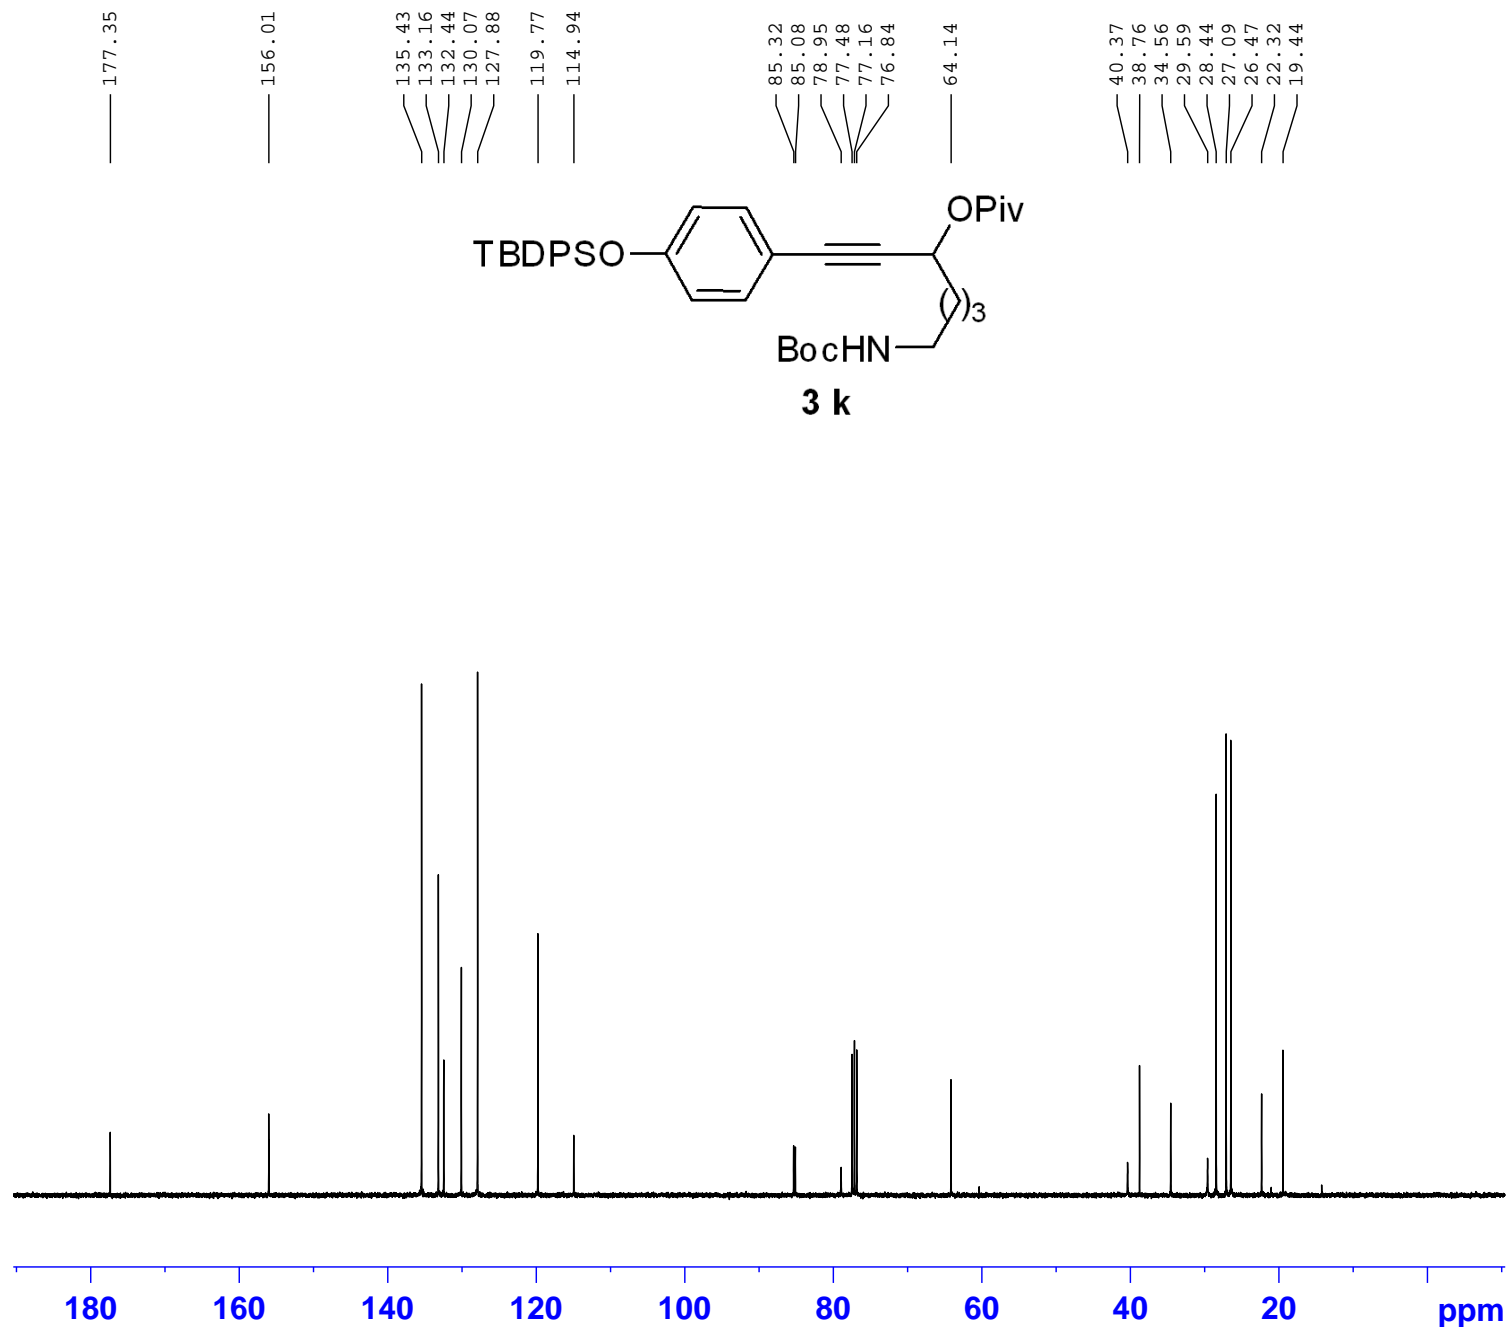

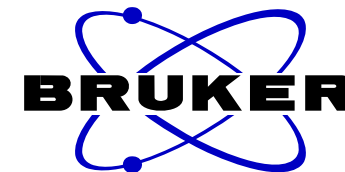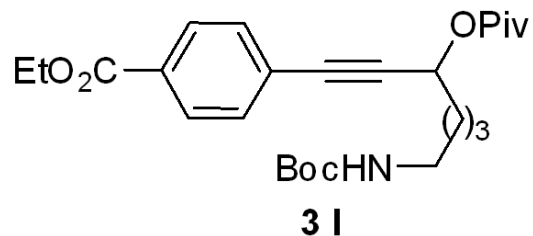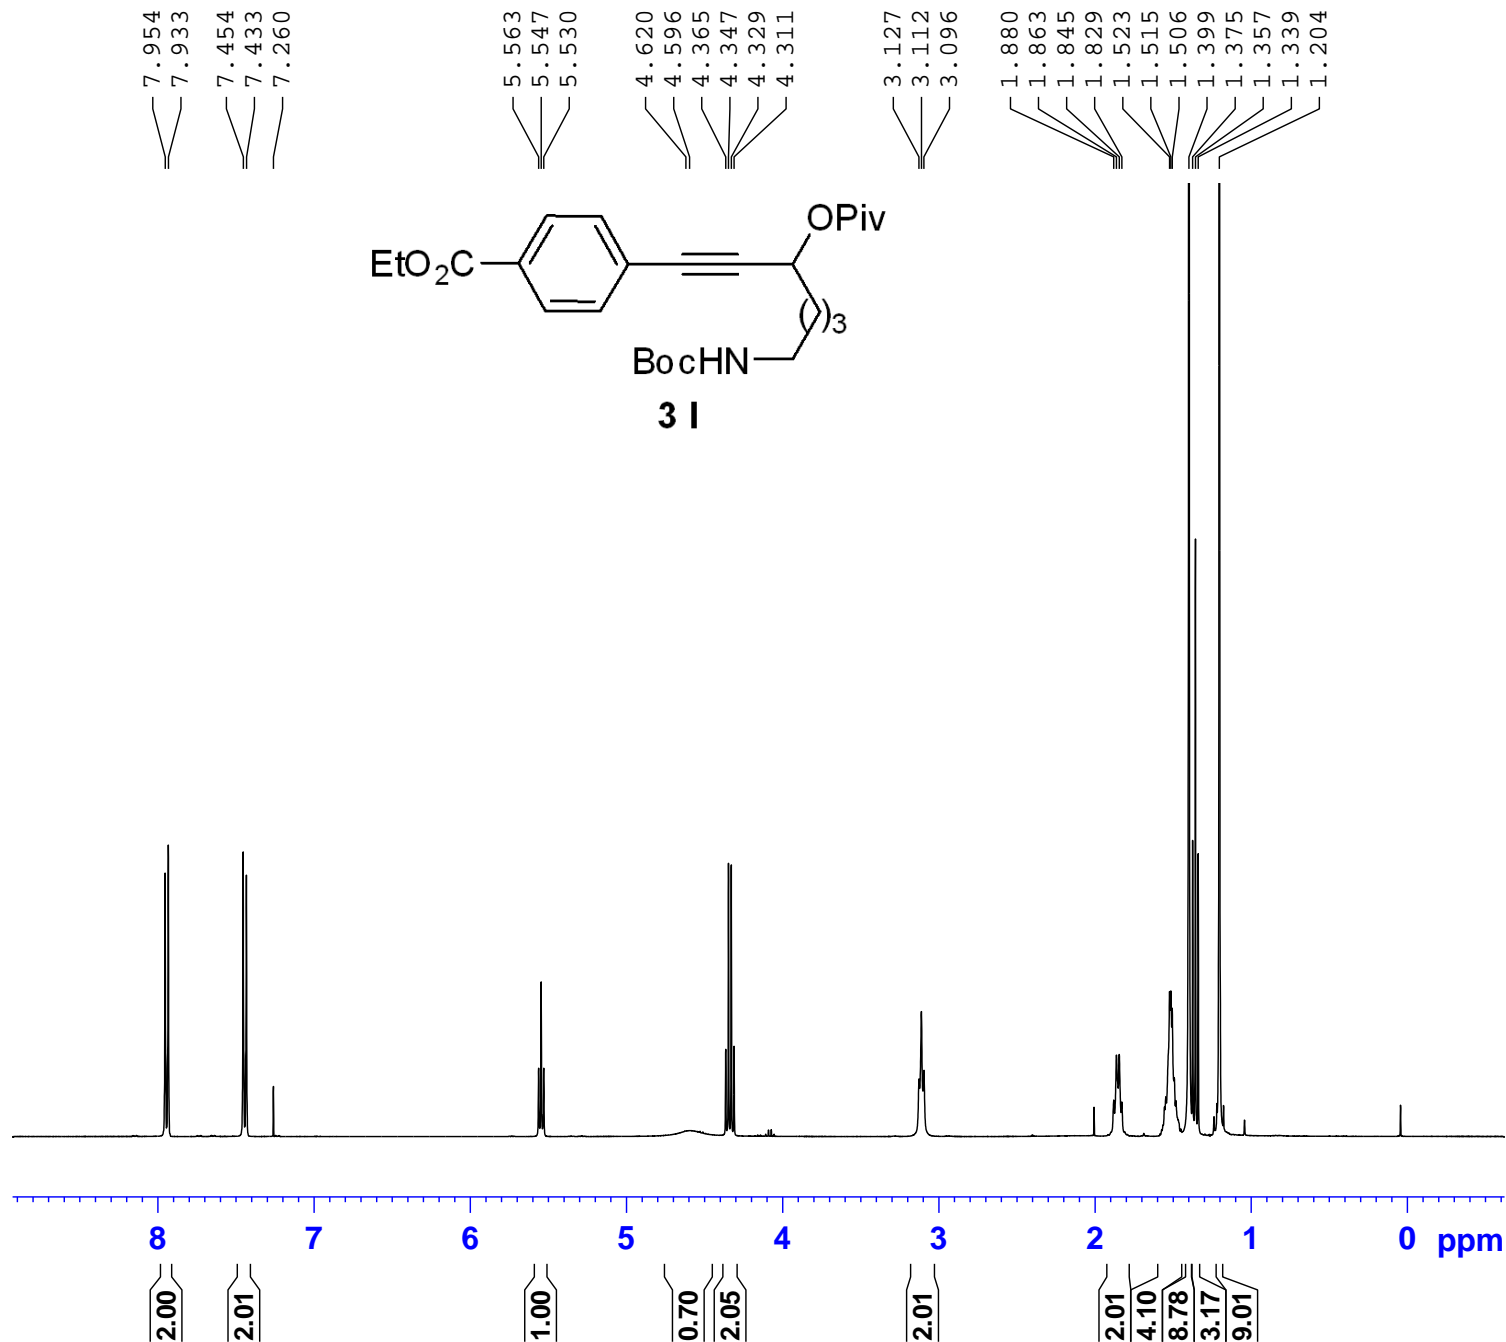

Current Data Parameters  
 NAME Jul15-2009 HJF 3-140  
 EXPNO 4  
 PROCNO 1

F2 - Acquisition Parameters  
 Date\_ 20090716  
 Time 2.09  
 INSTRUM spect  
 PROBHD 5 mm PABBO BB-  
 PULPROG zg30  
 TD 65536  
 SOLVENT CDCl3  
 NS 16  
 DS 0  
 SWH 8223.685 Hz  
 FIDRES 0.125483 Hz  
 AQ 3.9846387 sec  
 RG 50.8  
 DW 60.800 usec  
 DE 6.50 usec  
 TE 295.8 K  
 D1 1.0000000 sec  
 TD0 1

===== CHANNEL f1 =====  
 NUC1 1H  
 P1 12.00 usec  
 PL1 -2.00 dB  
 SFO1 400.1324710 MHz

F2 - Processing parameters  
 SI 32768  
 SF 400.1300091 MHz  
 WDW GM  
 SSB 0  
 LB -0.20 Hz  
 GB 0.1  
 PC 1.00

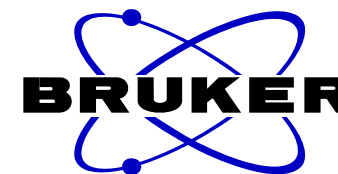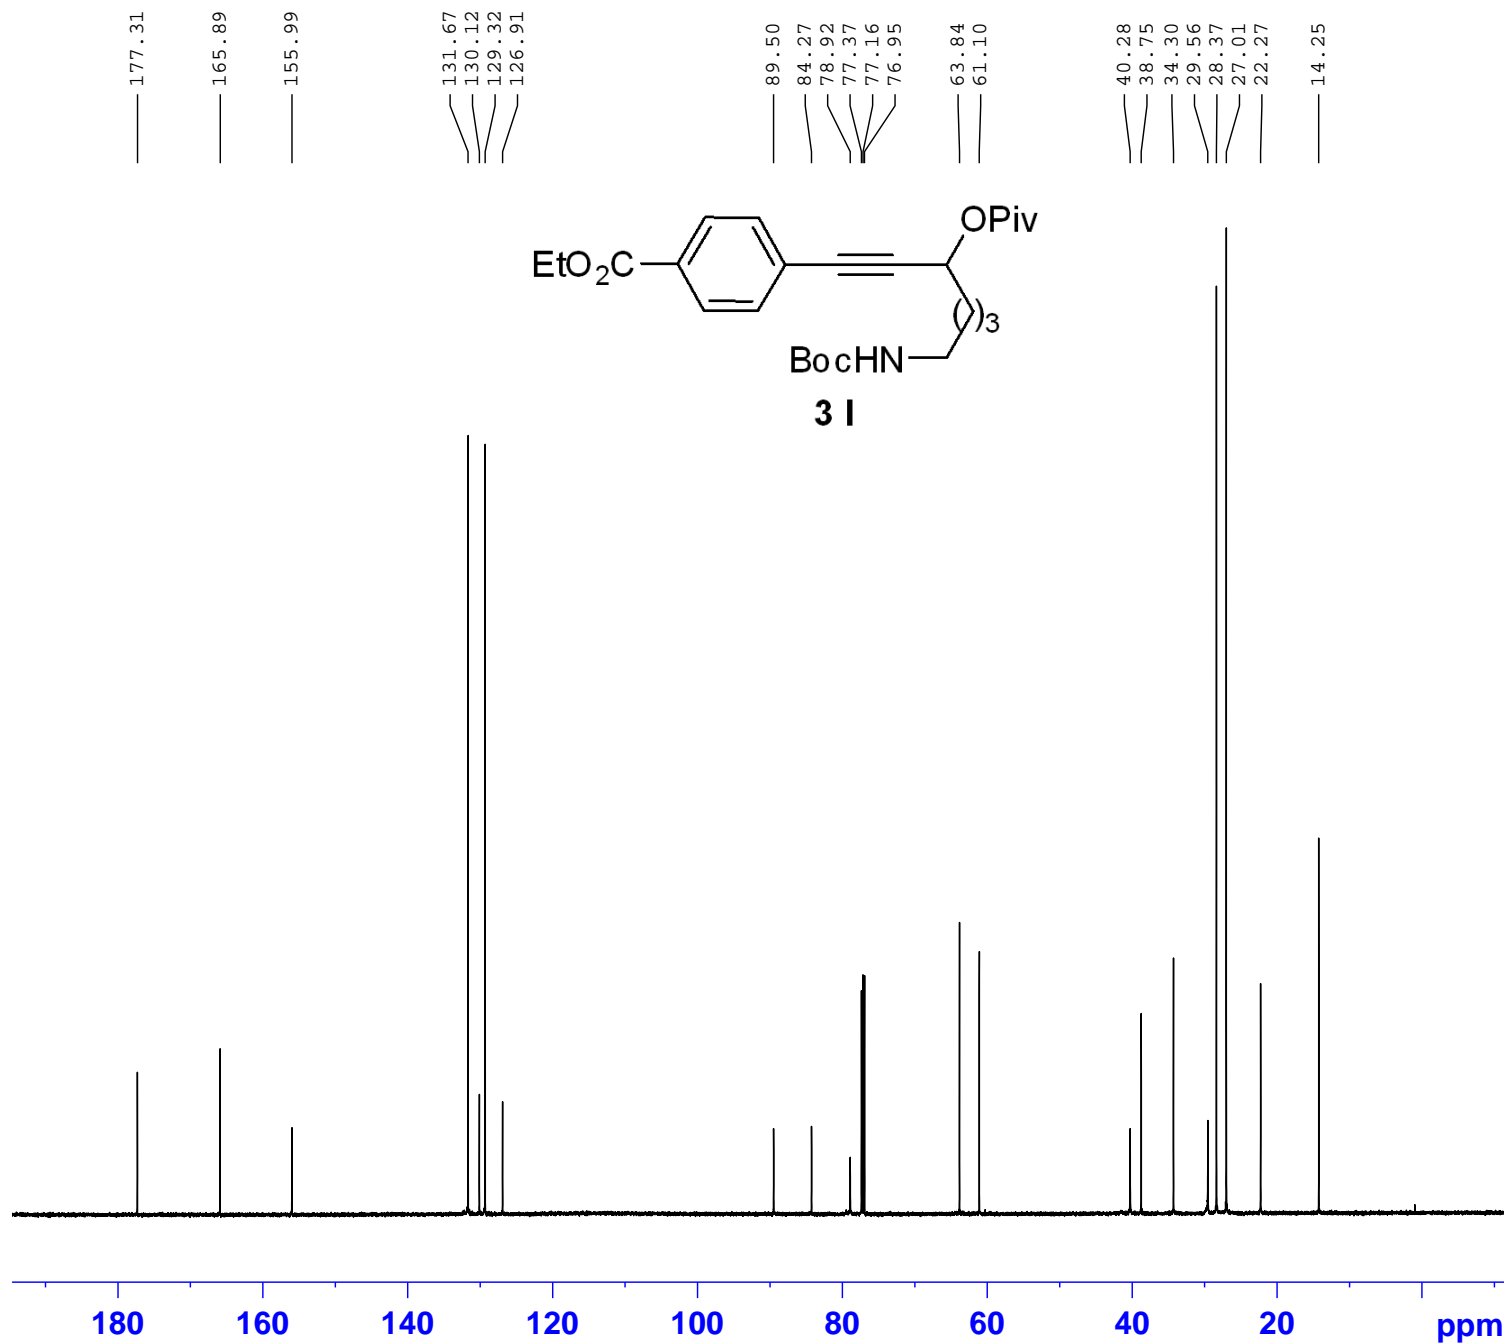

Current Data Parameters  
 NAME 2009-07-22 H<sub>2</sub>F 3-140  
 EXPNO 2  
 PROCNO 1

F2 - Acquisition Parameters  
 Date\_ 20090722  
 Time 21.28  
 INSTRUM spect  
 PROBHD 5 mm PATXI 1H/  
 PULPROG zgpg30  
 TD 65536  
 SOLVENT CDCl<sub>3</sub>  
 NS 512  
 DS 0  
 SWH 36057.691 Hz  
 FIDRES 0.550197 Hz  
 AQ 0.9088159 sec  
 RG 90.5  
 DW 13.867 usec  
 DE 6.50 usec  
 TE 296.4 K  
 D1 2.0000000 sec  
 d11 0.0300000 sec  
 DELTA 1.89999998 sec  
 TD0 1

==== CHANNEL f1 =====  
 NUC1 13C  
 P1 11.50 usec  
 PL1 -3.00 dB  
 SFO1 150.9178988 MHz

==== CHANNEL f2 =====  
 CPDPRG2 waltz16  
 NUC2 1H  
 PCPD2 80.00 usec  
 PL12 19.50 dB  
 PL13 19.50 dB  
 PL2 -1.00 dB  
 SFO2 600.1324005 MHz

F2 - Processing parameters  
 SI 32768  
 SF 150.9028050 MHz  
 WDW EM  
 SSB 0  
 LB 0.60 Hz  
 GB 0  
 PC 1.40



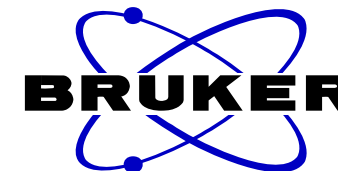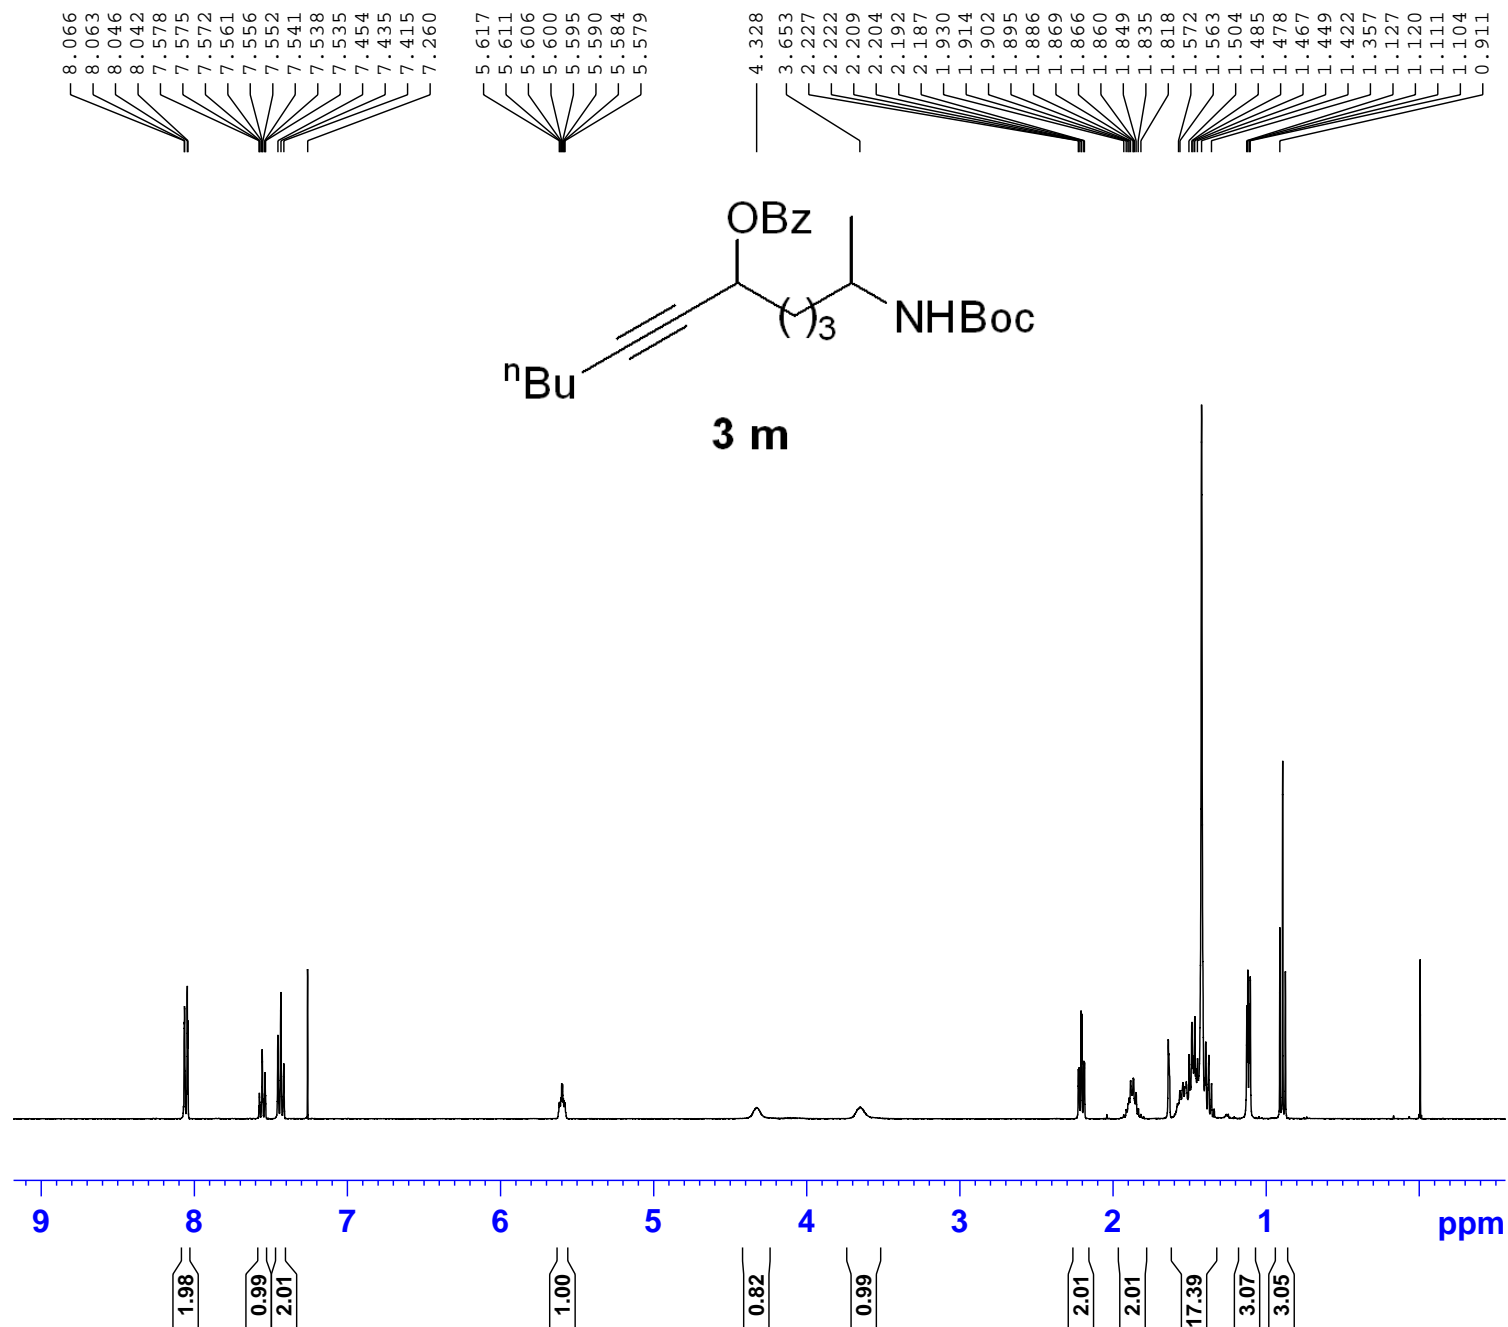

Current Data Parameters  
 NAME Nov11-2009 HX 1-127  
 EXPNO 10  
 PROCNO 1

F2 - Acquisition Parameters  
 Date\_ 20091112  
 Time 2.49  
 INSTRUM spect  
 PROBHD 5 mm PABBO BB-  
 PULPROG zg30  
 TD 65536  
 SOLVENT CDCl3  
 NS 8  
 DS 0  
 SWH 8223.685 Hz  
 FIDRES 0.125483 Hz  
 AQ 3.9846387 sec  
 RG 144  
 DW 60.800 usec  
 DE 6.50 usec  
 TE 295.9 K  
 D1 1.00000000 sec  
 TD0 1

==== CHANNEL f1 =====  
 NUC1 1H  
 P1 12.00 usec  
 PL1 -2.00 dB  
 SFO1 400.1324710 MHz

F2 - Processing parameters  
 SI 32768  
 SF 400.130095 MHz  
 WDW GM  
 SSB 0  
 LB -0.20 Hz  
 GB 0.1  
 PC 1.00

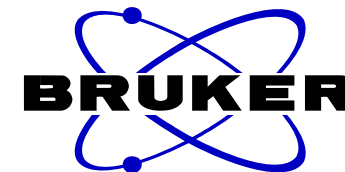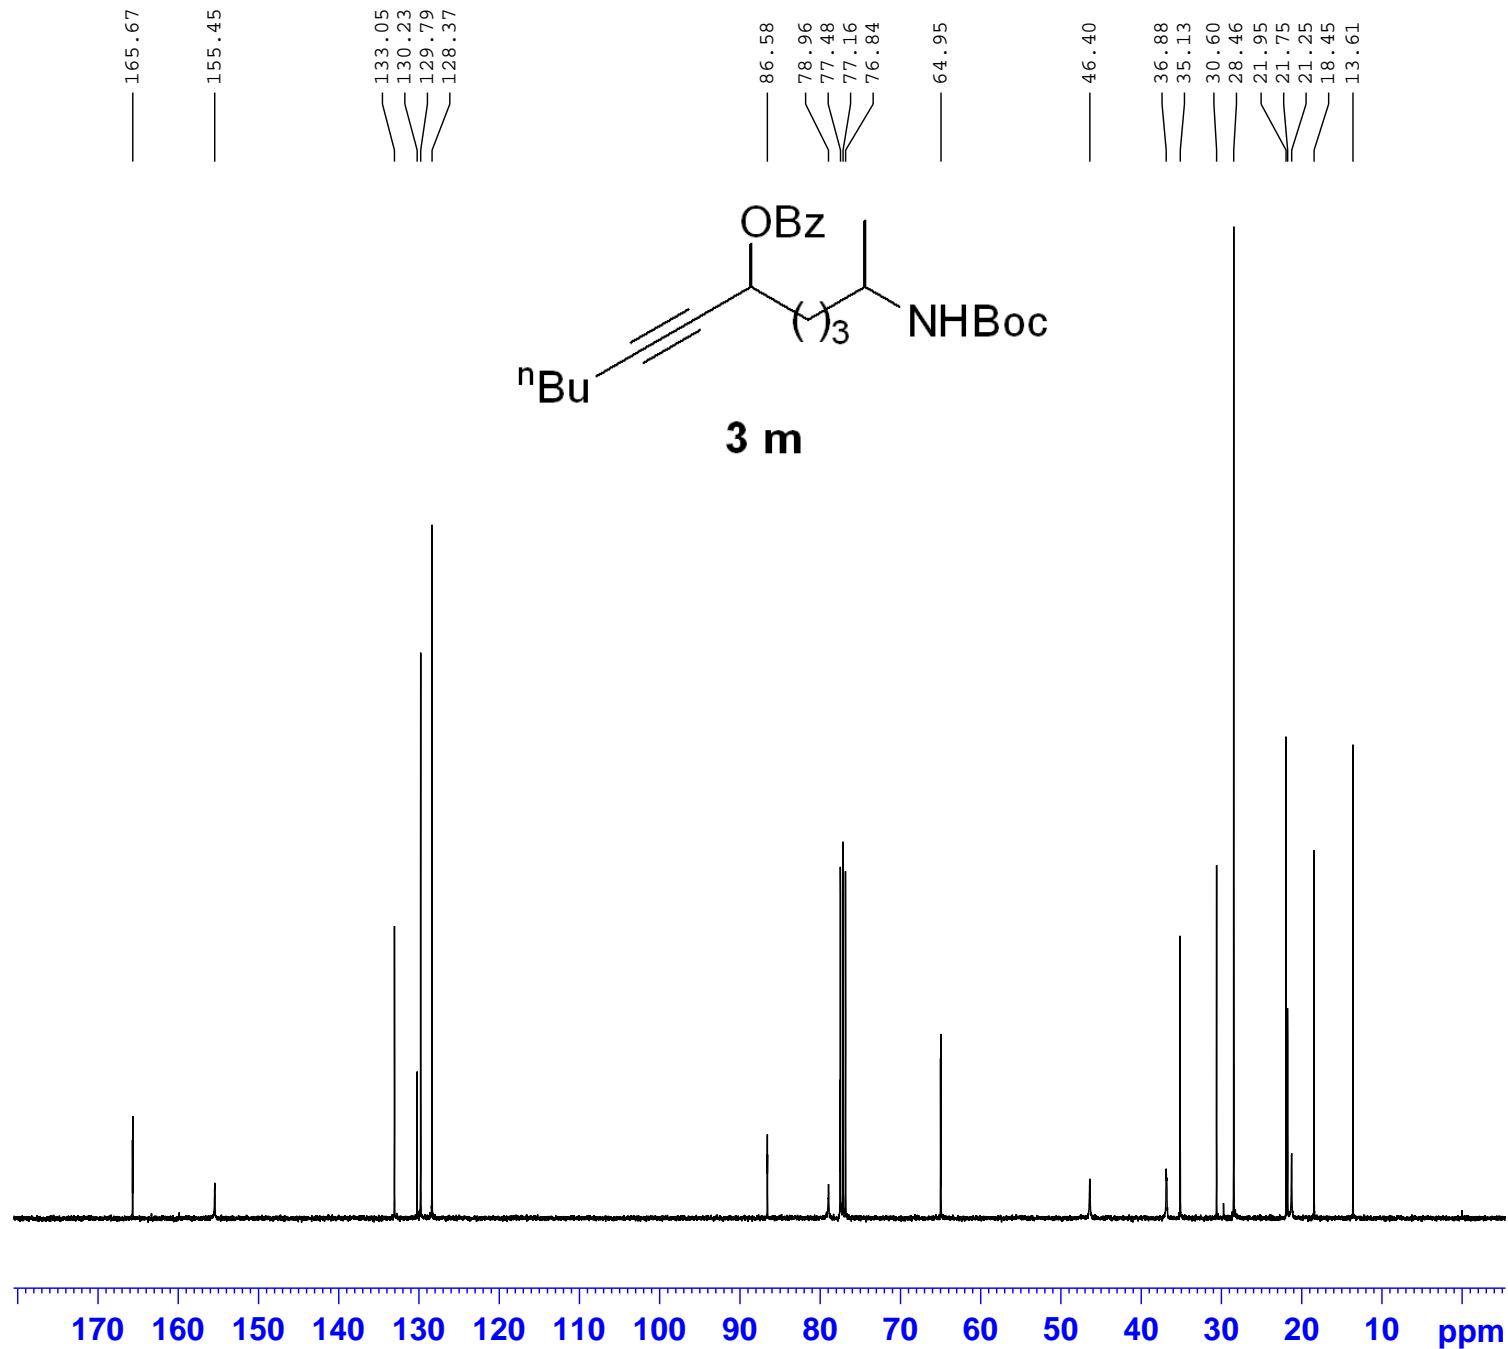

Current Data Parameters  
 NAME 2009-09-30 HX-1-127  
 EXPNO 2  
 PROCNO 1

F2 - Acquisition Parameters  
 Date\_ 20090930  
 Time 22.13  
 INSTRUM spect  
 PROBHD 5 mm PABBO BB-  
 PULPROG zgpg30  
 TD 65536  
 SOLVENT CDCl3  
 NS 512  
 DS 0  
 SWH 24038.461 Hz  
 FIDRES 0.366798 Hz  
 AQ 1.3631988 sec  
 RG 181  
 DW 20.800 usec  
 DE 6.50 usec  
 TE 298.0 K  
 D1 2.0000000 sec  
 d11 0.0300000 sec  
 DELTA 1.89999998 sec  
 TD0 1

==== CHANNEL f1 =====  
 NUC1 13C  
 P1 15.50 usec  
 PL1 -1.00 dB  
 SFO1 100.6228298 MHz

==== CHANNEL f2 =====  
 CPDPRG2 waltz16  
 NUC2 1H  
 PCPD2 60.00 usec  
 PL12 11.35 dB  
 PL13 13.05 dB  
 PL2 -2.00 dB  
 SFO2 400.1316005 MHz

F2 - Processing parameters  
 SI 32768  
 SF 100.6127620 MHz  
 WDW EM  
 SSB 0  
 LB 0.60 Hz  
 GB 0  
 PC 1.40

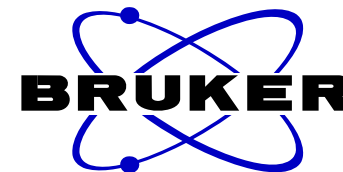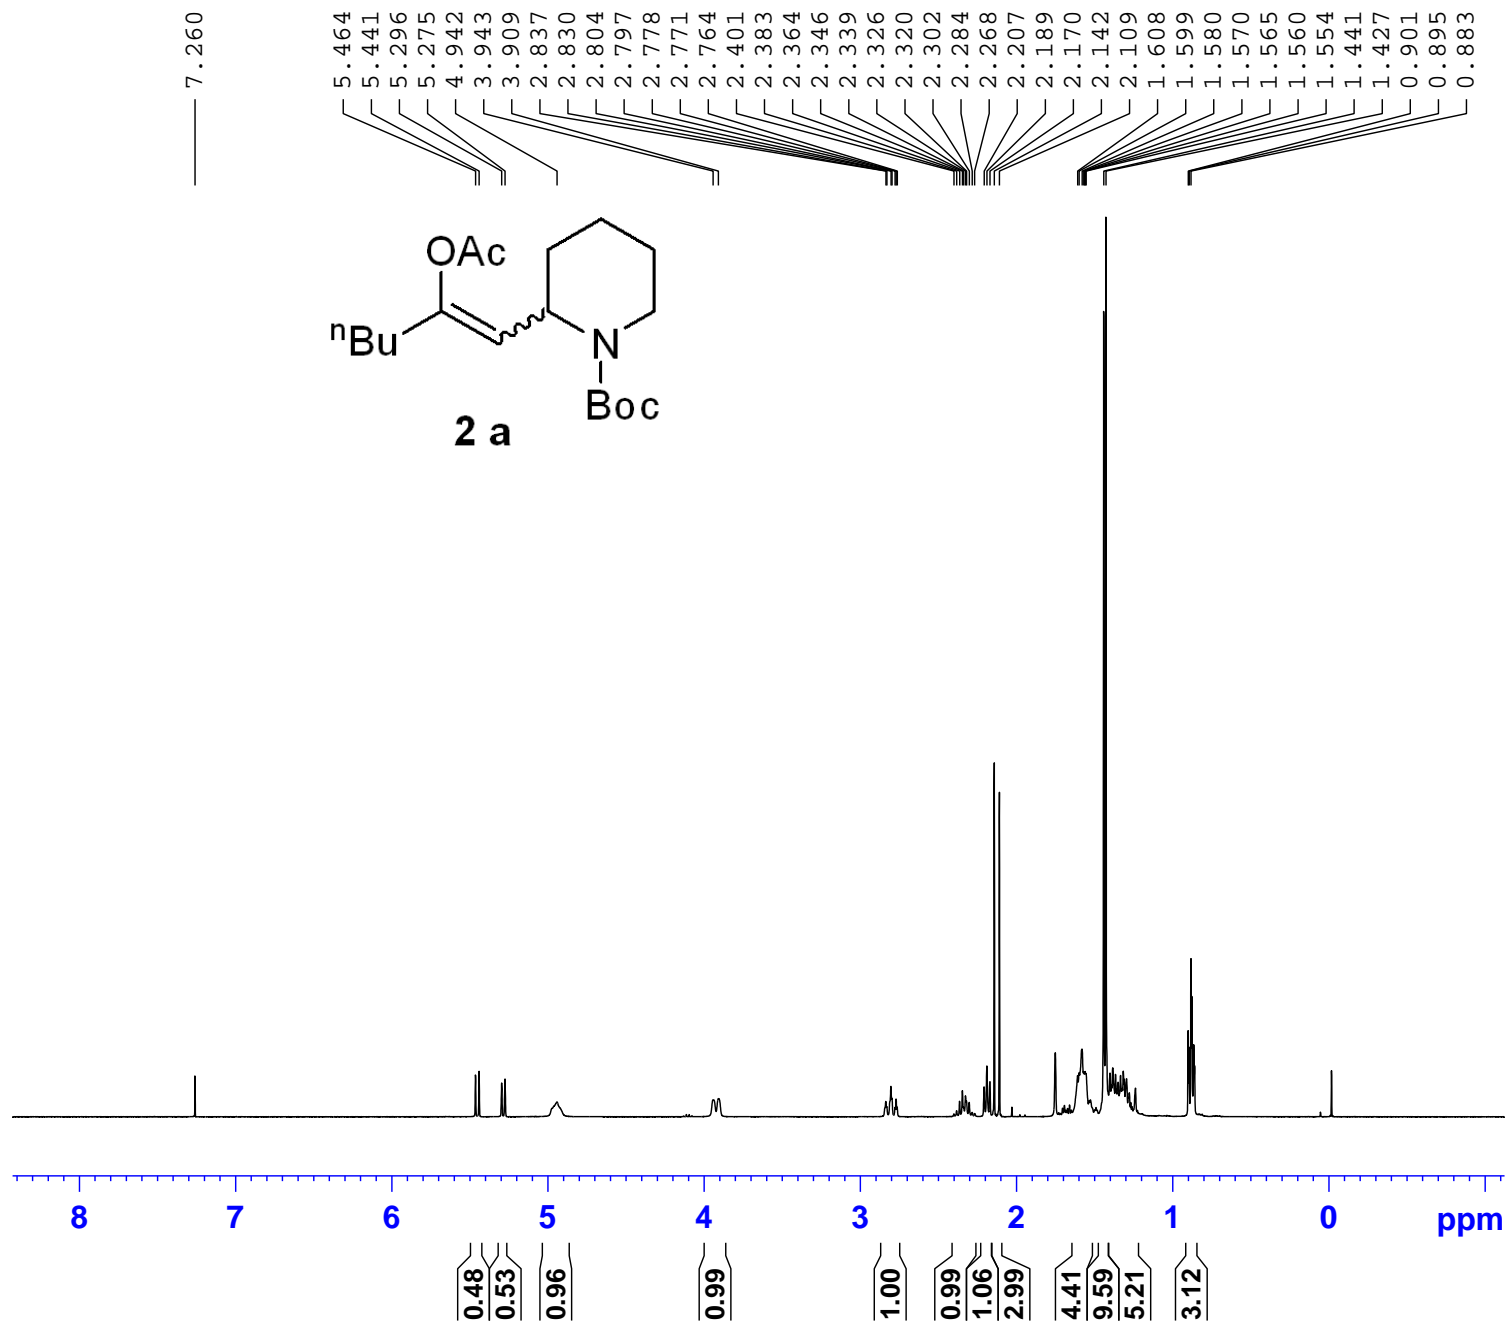

Current Data Parameters  
 NAME Aug19-2009 HJF 3-17701  
 EXPNO 12  
 PROCNO 1

F2 - Acquisition Parameters  
 Date\_ 20090820  
 Time 2.24  
 INSTRUM spect  
 PROBHD 5 mm PABBO BB-  
 PULPROG zg30  
 TD 65536  
 SOLVENT CDCl3  
 NS 16  
 DS 0  
 SWH 8223.685 Hz  
 FIDRES 0.125483 Hz  
 AQ 3.9846387 sec  
 RG 90.5  
 DW 60.800 usec  
 DE 6.50 usec  
 TE 295.3 K  
 D1 1.00000000 sec  
 TD0 1

==== CHANNEL f1 =====  
 NUC1 1H  
 P1 12.00 usec  
 PL1 -2.00 dB  
 SFO1 400.1324710 MHz

F2 - Processing parameters  
 SI 32768  
 SF 400.1300096 MHz  
 WDW GM  
 SSB 0  
 LB -0.20 Hz  
 GB 0.1  
 PC 1.00

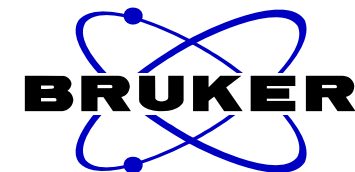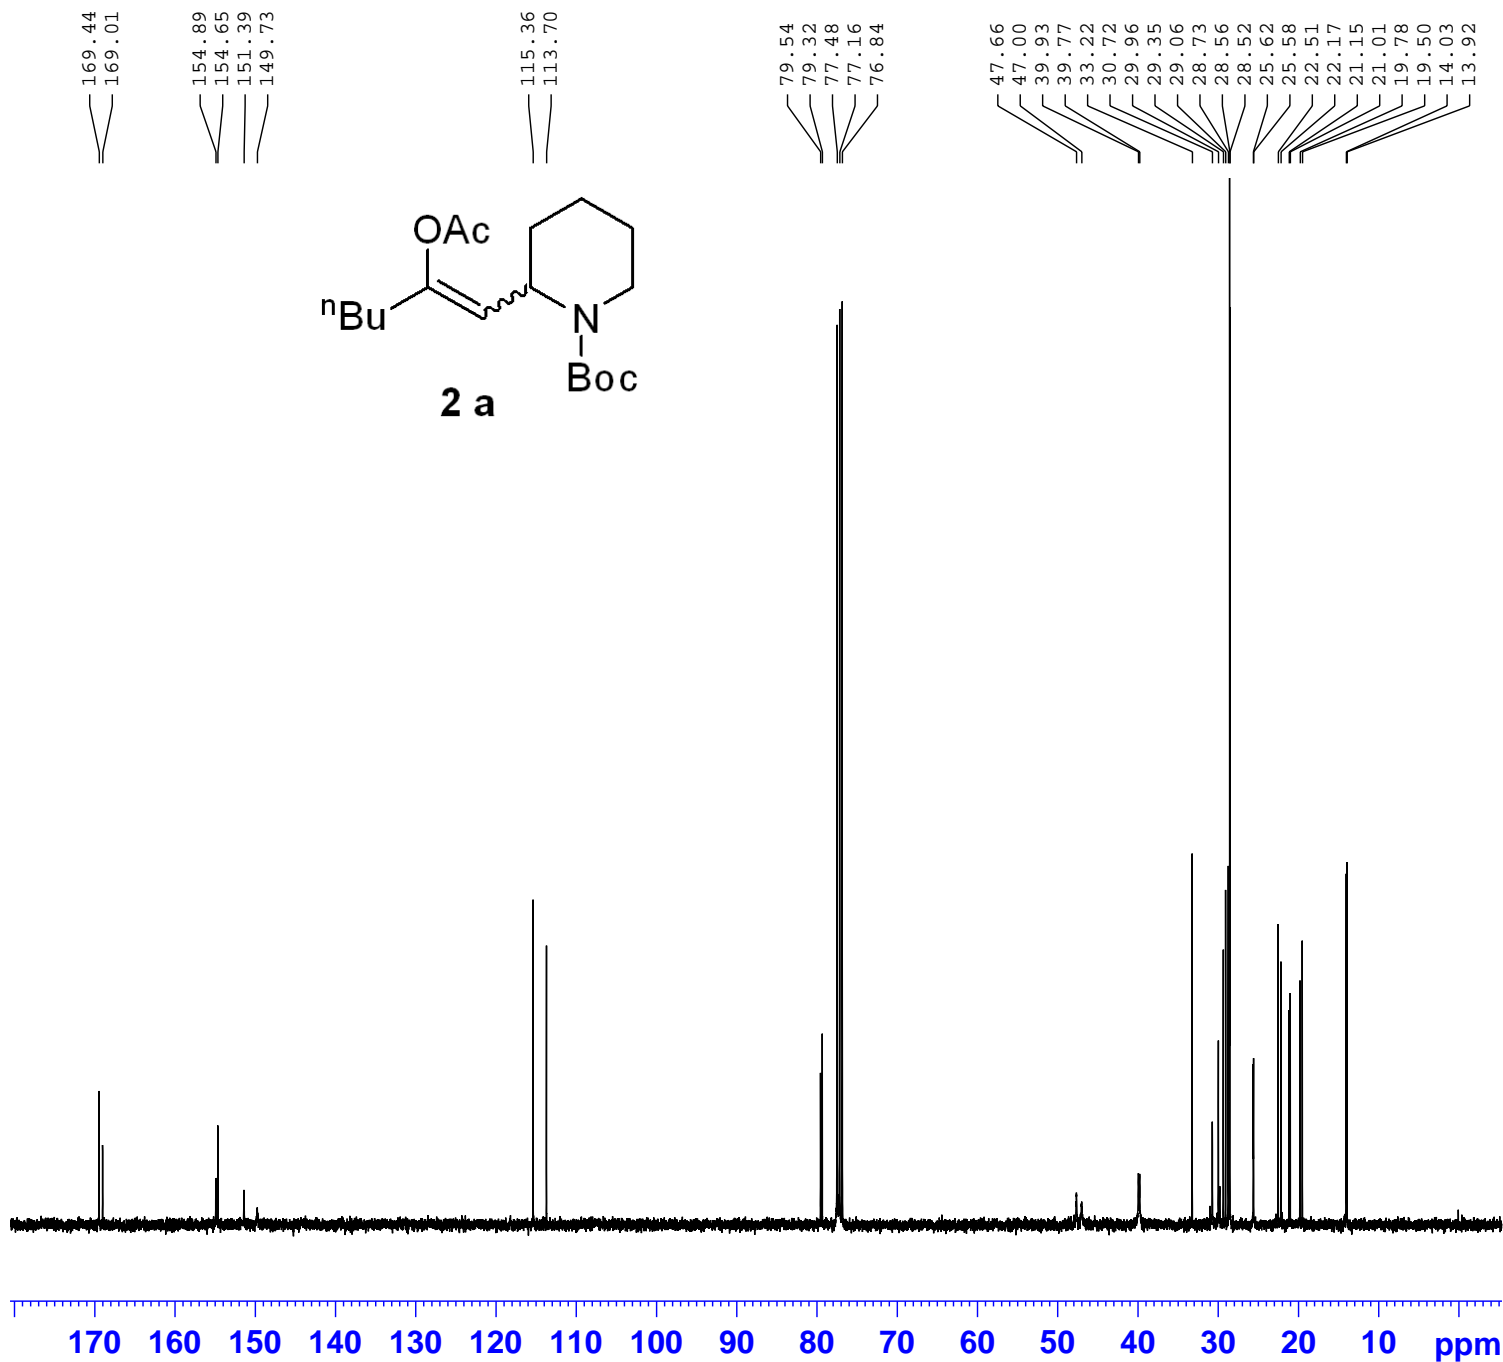

Current Data Parameters  
 NAME 2009-08-25 HJF 3-17701  
 EXPNO 1  
 PROCNO 1

F2 - Acquisition Parameters  
 Date\_ 20090825  
 Time 18.53  
 INSTRUM spect  
 PROBHD 5 mm PABBO BB-  
 PULPROG zgpg30  
 TD 65536  
 SOLVENT CDCl3  
 NS 512  
 DS 0  
 SWH 24038.461 Hz  
 FIDRES 0.366798 Hz  
 AQ 1.3631988 sec  
 RG 181  
 DW 20.800 usec  
 DE 6.50 usec  
 TE 297.1 K  
 D1 2.00000000 sec  
 d11 0.03000000 sec  
 DELTA 1.89999998 sec  
 TD0 1

==== CHANNEL f1 =====  
 NUC1 13C  
 P1 15.50 usec  
 PL1 -1.00 dB  
 SFO1 100.6228298 MHz

==== CHANNEL f2 =====  
 CPDPRG2 waltz16  
 NUC2 1H  
 PCPD2 60.00 usec  
 PL12 11.35 dB  
 PL13 13.05 dB  
 PL2 -2.00 dB  
 SFO2 400.1316005 MHz

F2 - Processing parameters  
 SI 32768  
 SF 100.6127574 MHz  
 WDW EM  
 SSB 0  
 LB 0.60 Hz  
 GB 0  
 PC 1.40

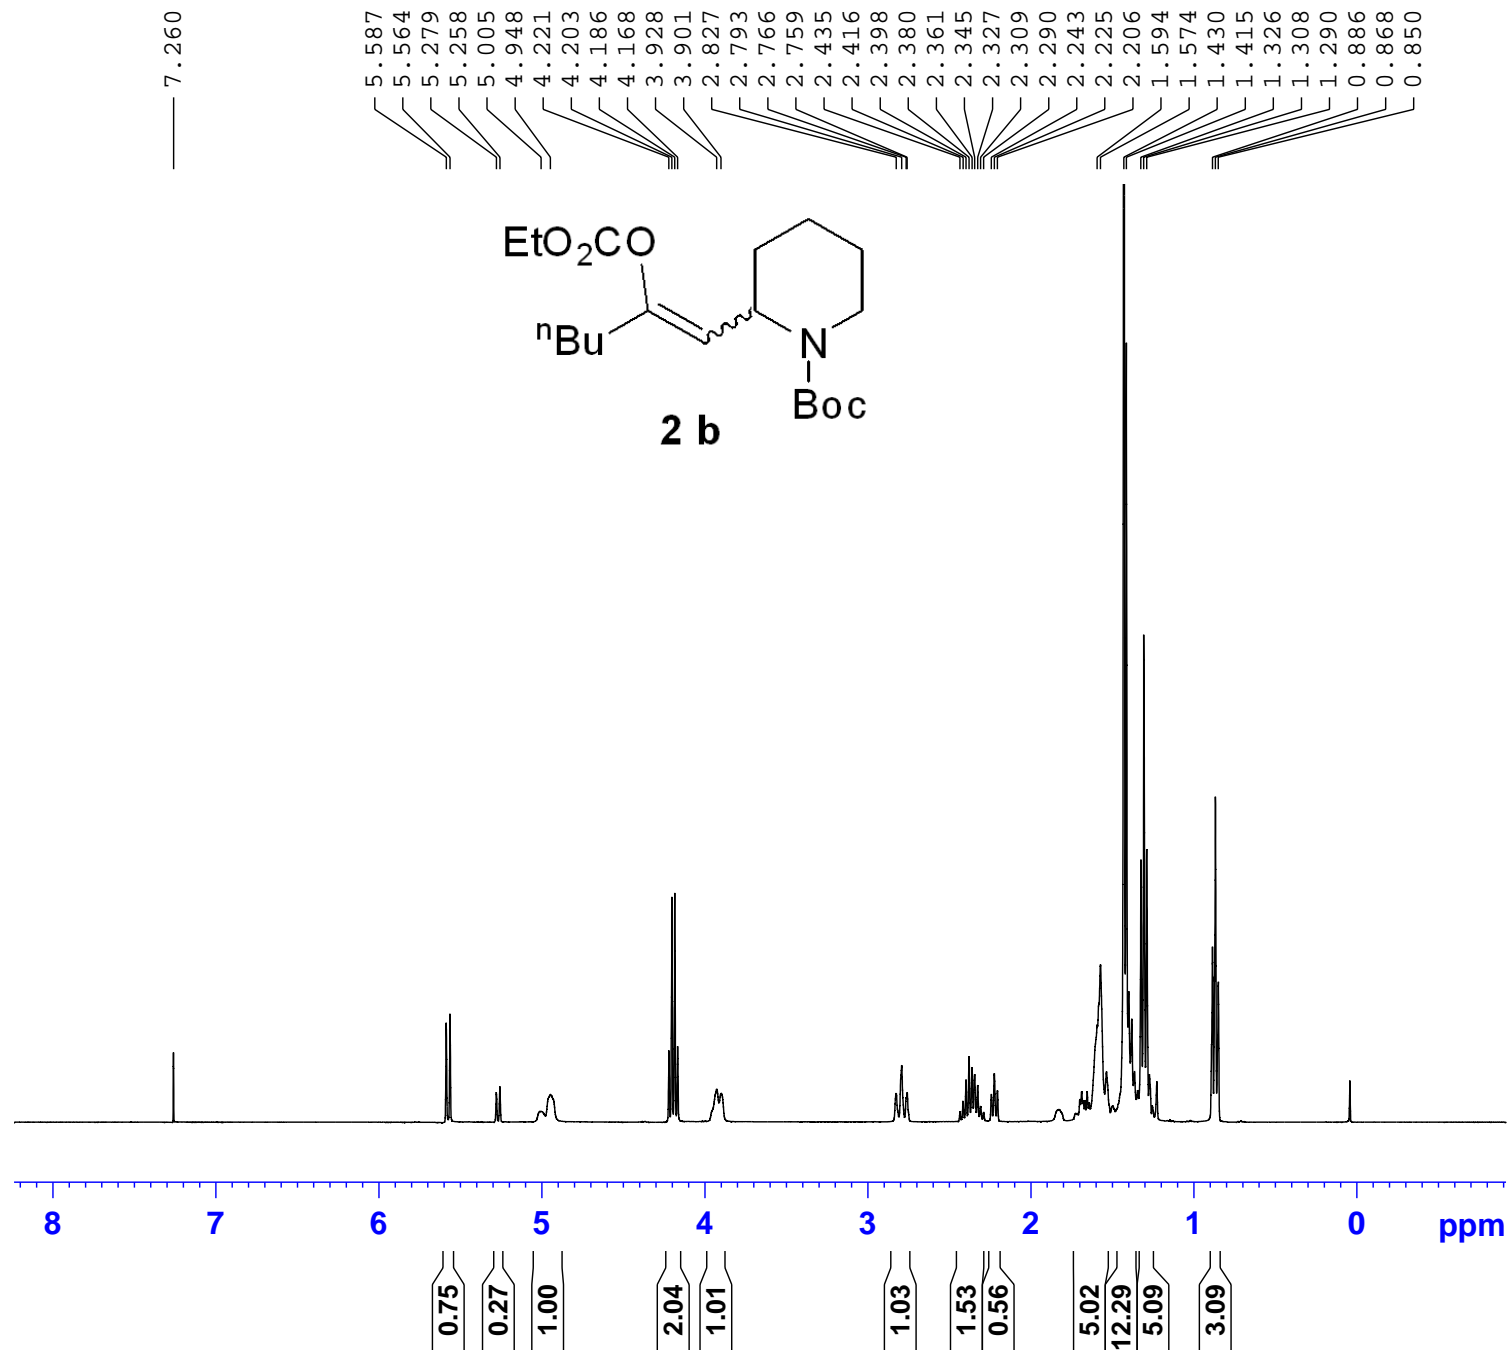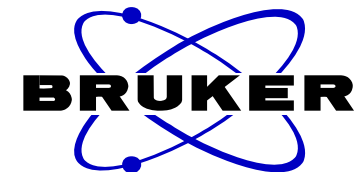

Current Data Parameters  
NAME Jul03-2009 HJF 3-12804  
EXPNO 5  
PROCNO 1

F2 - Acquisition Parameters  
Date\_ 20090704  
Time 1.26  
INSTRUM spect  
PROBHD 5 mm PABBO BB-  
PULPROG zg30  
TD 65536  
SOLVENT CDCl3  
NS 16  
DS 0  
SWH 8223.685 Hz  
FIDRES 0.125483 Hz  
AQ 3.9846387 sec  
RG 50.8  
DW 60.800 usec  
DE 6.50 usec  
TE 296.0 K  
D1 1.00000000 sec  
TD0 1

==== CHANNEL f1 =====  
NUC1 1H  
P1 12.00 usec  
PL1 -2.00 dB  
SFO1 400.1324710 MHz

F2 - Processing parameters  
SI 32768  
SF 400.1300092 MHz  
WDW GM  
SSB 0  
LB -0.20 Hz  
GB 0.1  
PC 1.00

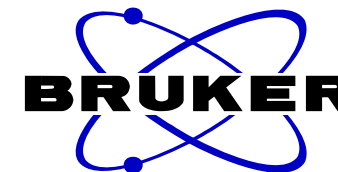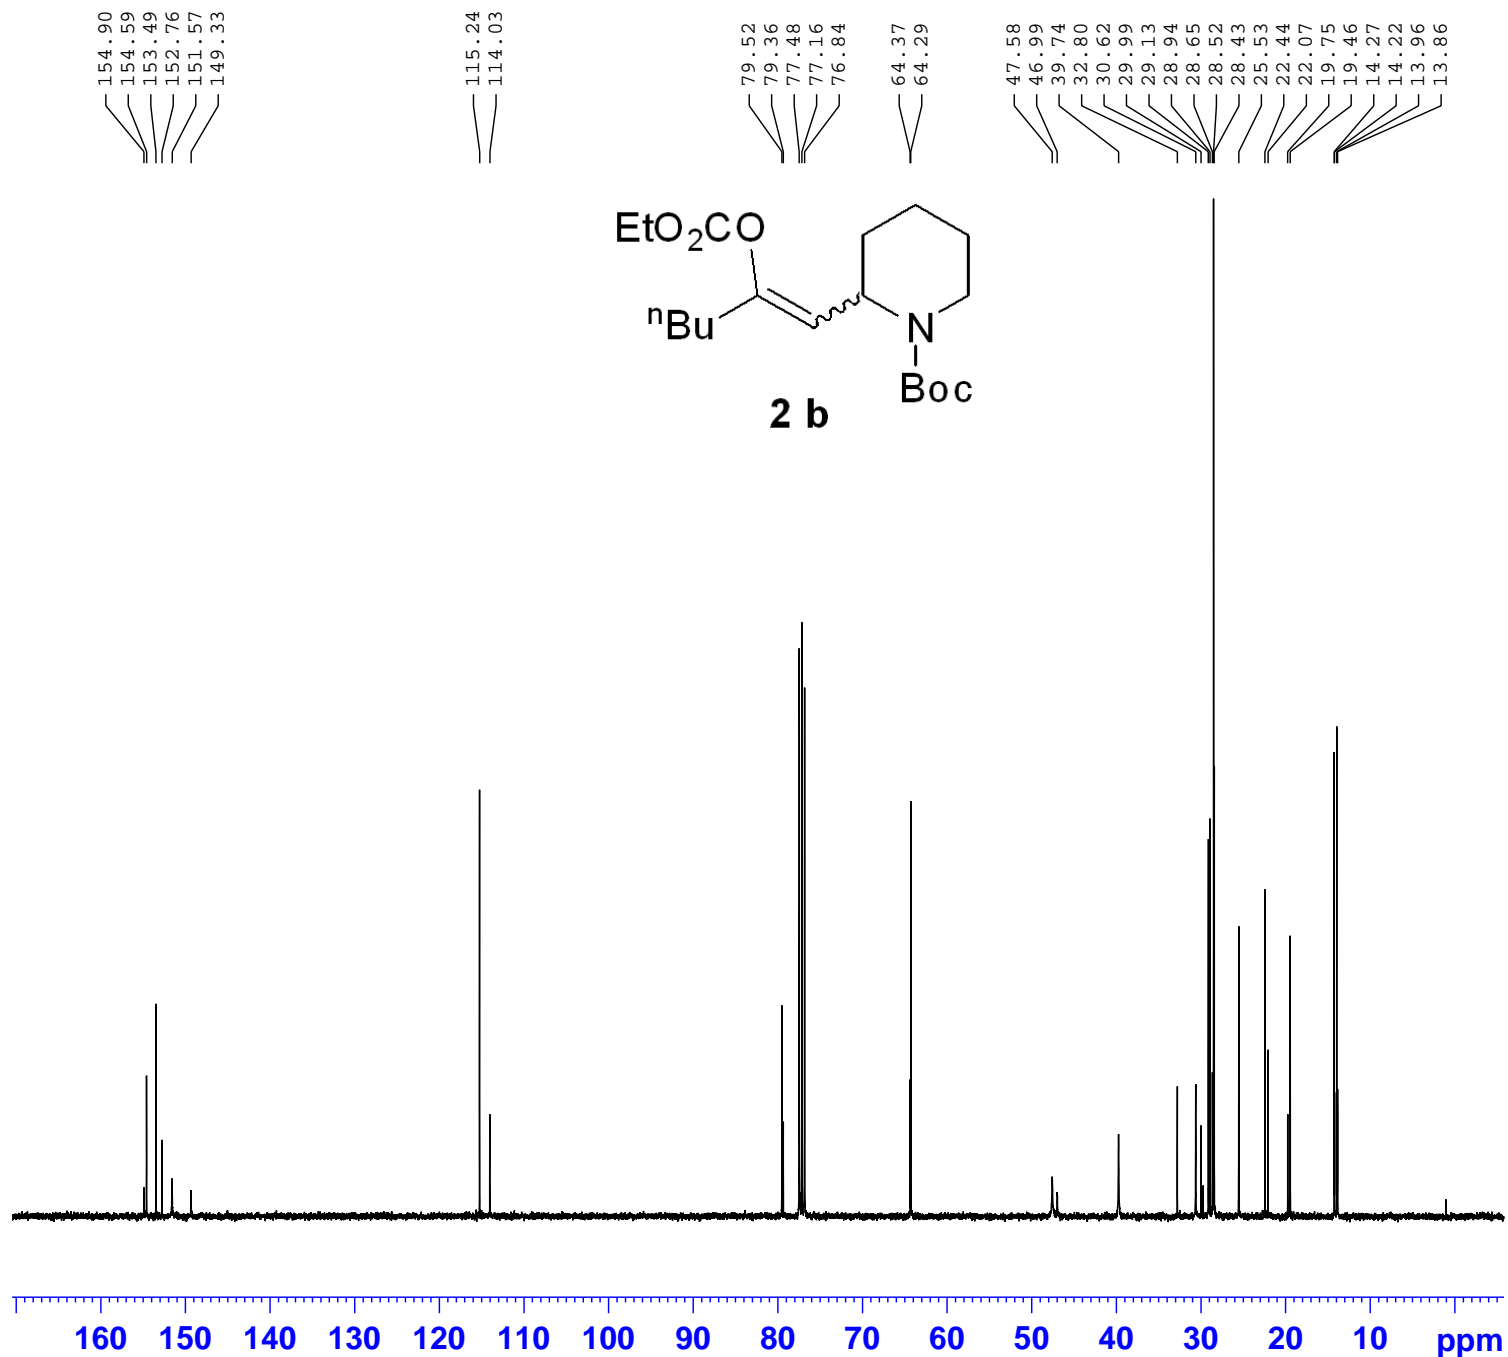

Current Data Parameters  
NAME 2009-07-09 HJF 3-12804  
EXPNO 1  
PROCNO 1

F2 - Acquisition Parameters  
Date\_ 20090709  
Time 23.43  
INSTRUM spect  
PROBHD 5 mm PABBO BB-  
PULPROG zgpg30  
TD 65536  
SOLVENT CDCl3  
NS 512  
DS 0  
SWH 24038.461 Hz  
FIDRES 0.366798 Hz  
AQ 1.3631988 sec  
RG 181  
DW 20.800 usec  
DE 6.50 usec  
TE 296.9 K  
D1 2.0000000 sec  
d11 0.0300000 sec  
DELTA 1.89999998 sec  
TD0 1

=====  
CHANNEL f1  
NUC1 13C  
P1 15.50 usec  
PL1 -1.00 dB  
SFO1 100.6228298 MHz

=====  
CHANNEL f2  
CPDPRG2 waltz16  
NUC2 1H  
PCPD2 60.00 usec  
PL12 11.35 dB  
PL13 13.05 dB  
PL2 -2.00 dB  
SFO2 400.1316005 MHz

F2 - Processing parameters  
SI 32768  
SF 100.6127590 MHz  
WDW EM  
SSB 0  
LB 0.60 Hz  
GB 0  
PC 1.40

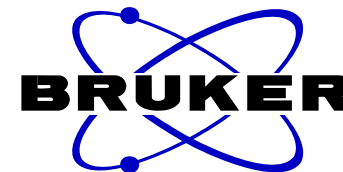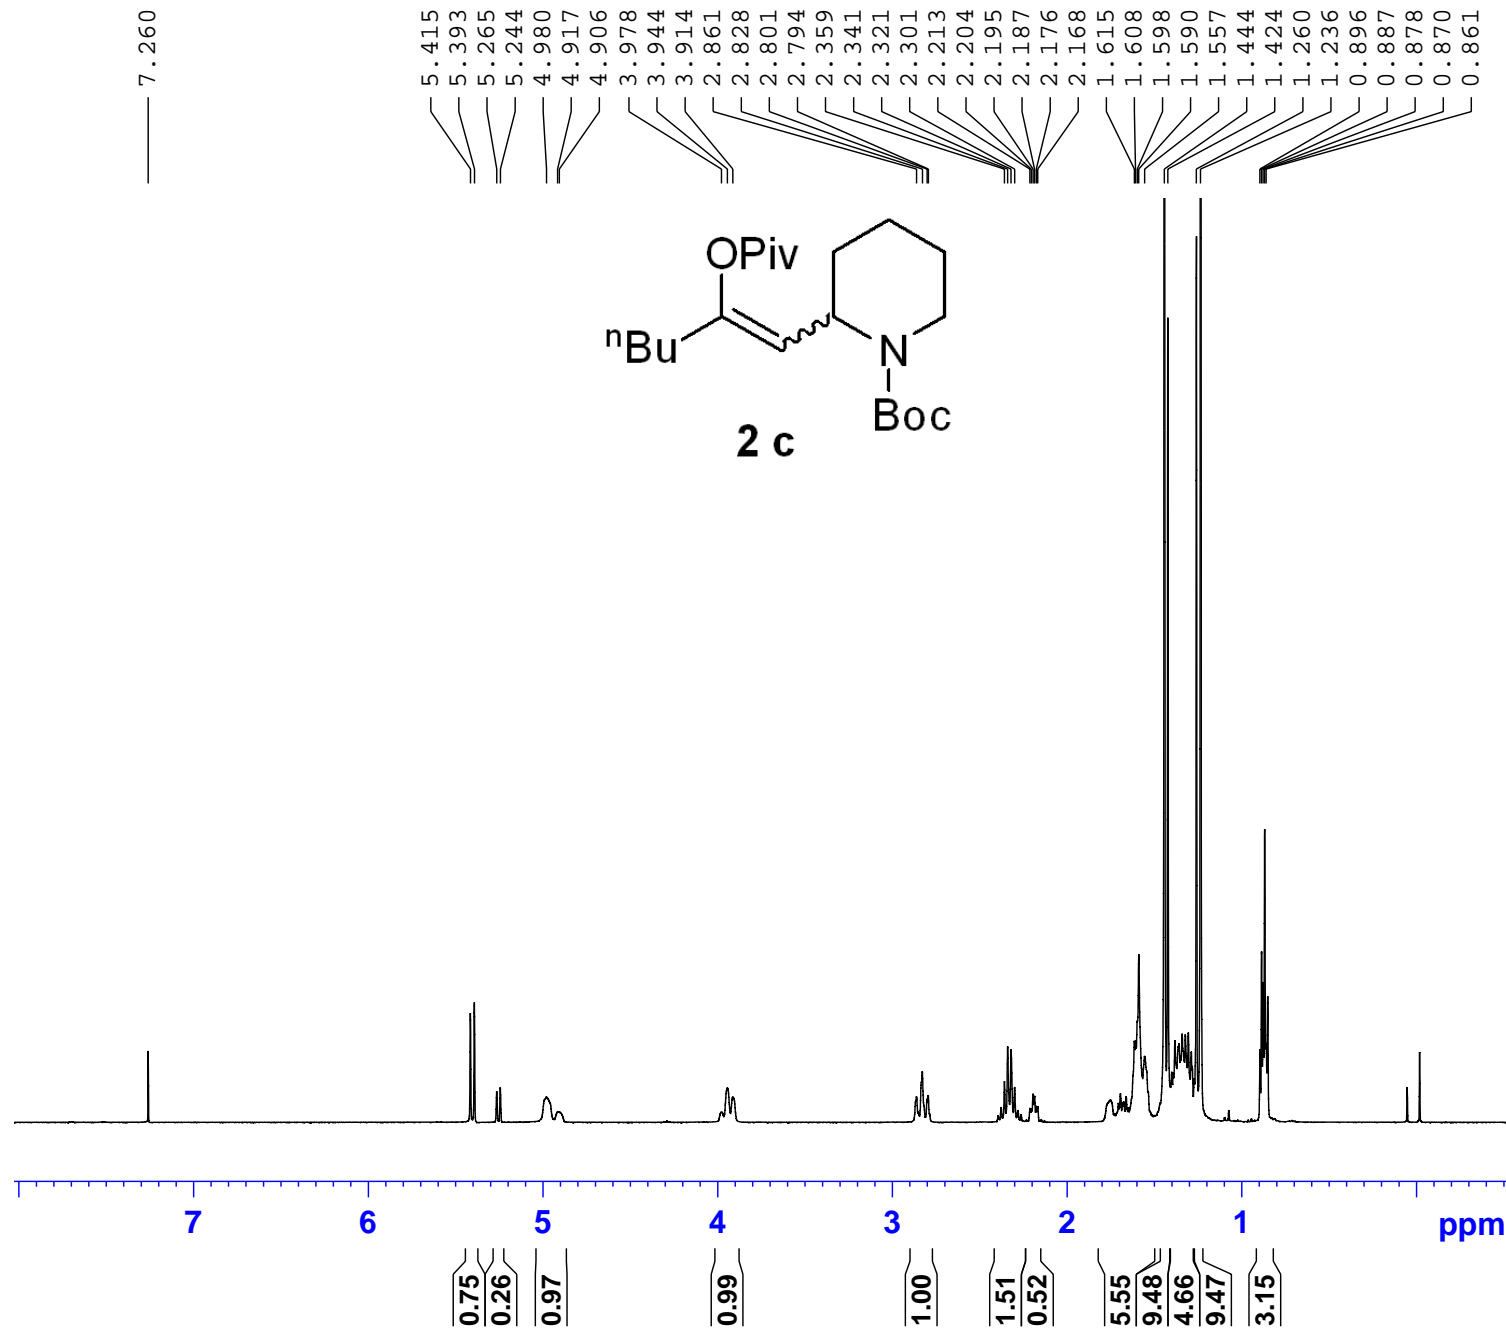

Current Data Parameters  
 NAME Aug19-2009 HJF 3-17703  
 EXPNO 13  
 PROCNO 1

F2 - Acquisition Parameters  
 Date\_ 20090820  
 Time 2.29  
 INSTRUM spect  
 PROBHD 5 mm PABBO BB-  
 PULPROG zg30  
 TD 65536  
 SOLVENT CDCl3  
 NS 16  
 DS 0  
 SWH 8223.685 Hz  
 FIDRES 0.125483 Hz  
 AQ 3.9846387 sec  
 RG 71.8  
 DW 60.800 usec  
 DE 6.50 usec  
 TE 295.4 K  
 D1 1.00000000 sec  
 TD0 1

==== CHANNEL f1 =====  
 NUC1 1H  
 P1 12.00 usec  
 PL1 -2.00 dB  
 SFO1 400.1324710 MHz

F2 - Processing parameters  
 SI 32768  
 SF 400.130096 MHz  
 WDW GM  
 SSB 0  
 LB -0.20 Hz  
 GB 0.1  
 PC 1.00

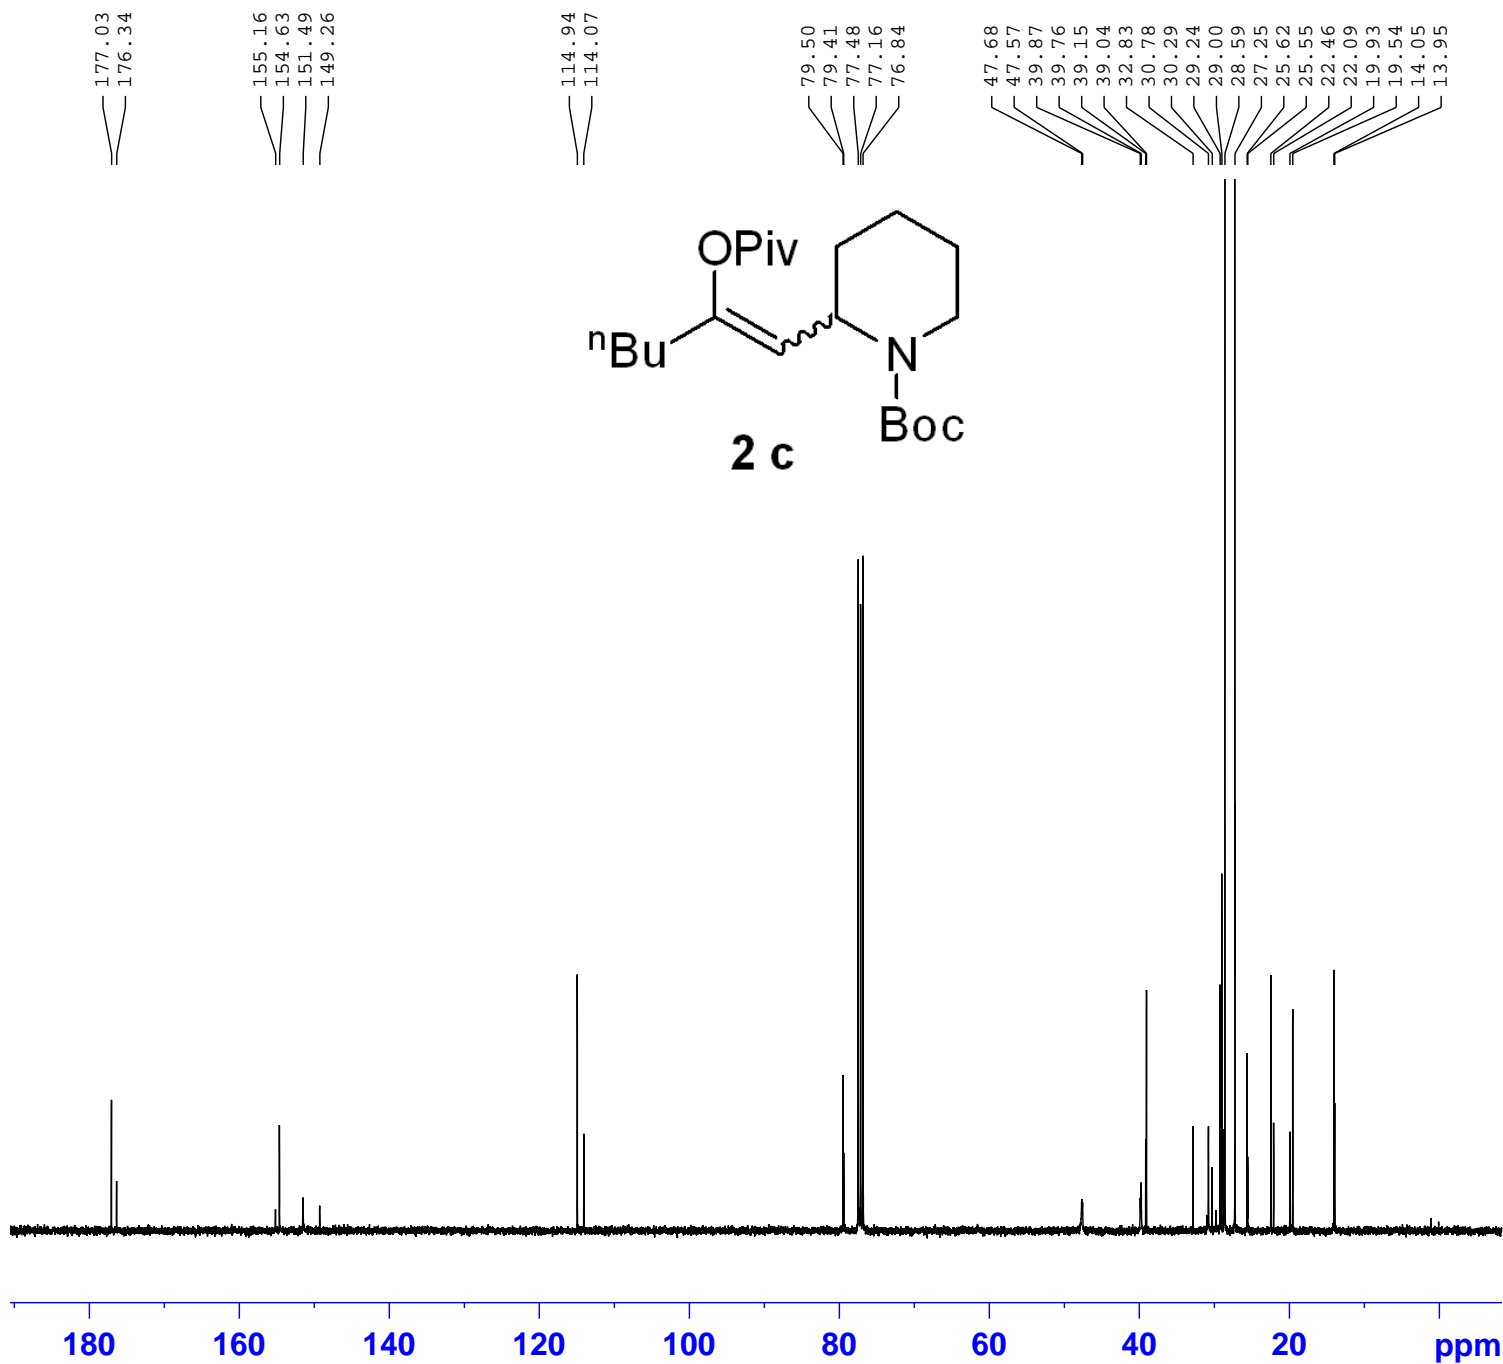

Current Data Parameters  
NAME 2009-08-25 HJF 3-17703  
EXPNO 1  
PROCNO 1

F2 - Acquisition Parameters  
Date\_ 20090825  
Time 20.07  
INSTRUM spect  
PROBHD 5 mm PABBO BB-  
PULPROG zgpg30  
TD 65536  
SOLVENT CDCl3  
NS 512  
DS 0  
SWH 24038.461 Hz  
FIDRES 0.366798 Hz  
AQ 1.3631988 sec  
RG 181  
DW 20.800 usec  
DE 6.50 usec  
TE 297.3 K  
D1 2.00000000 sec  
d11 0.03000000 sec  
DELTA 1.89999998 sec  
TD0 1

=====  
CHANNEL f1  
NUC1 13C  
P1 15.50 usec  
PL1 -1.00 dB  
SFO1 100.6228298 MHz

=====  
CHANNEL f2  
CPDPRG2 waltz16  
NUC2 1H  
PCPD2 60.00 usec  
PL12 11.35 dB  
PL13 13.05 dB  
PL2 -2.00 dB  
SFO2 400.1316005 MHz

F2 - Processing parameters  
SI 32768  
SF 100.6127566 MHz  
WDW EM  
SSB 0  
LB 0.60 Hz  
GB 0  
PC 1.40



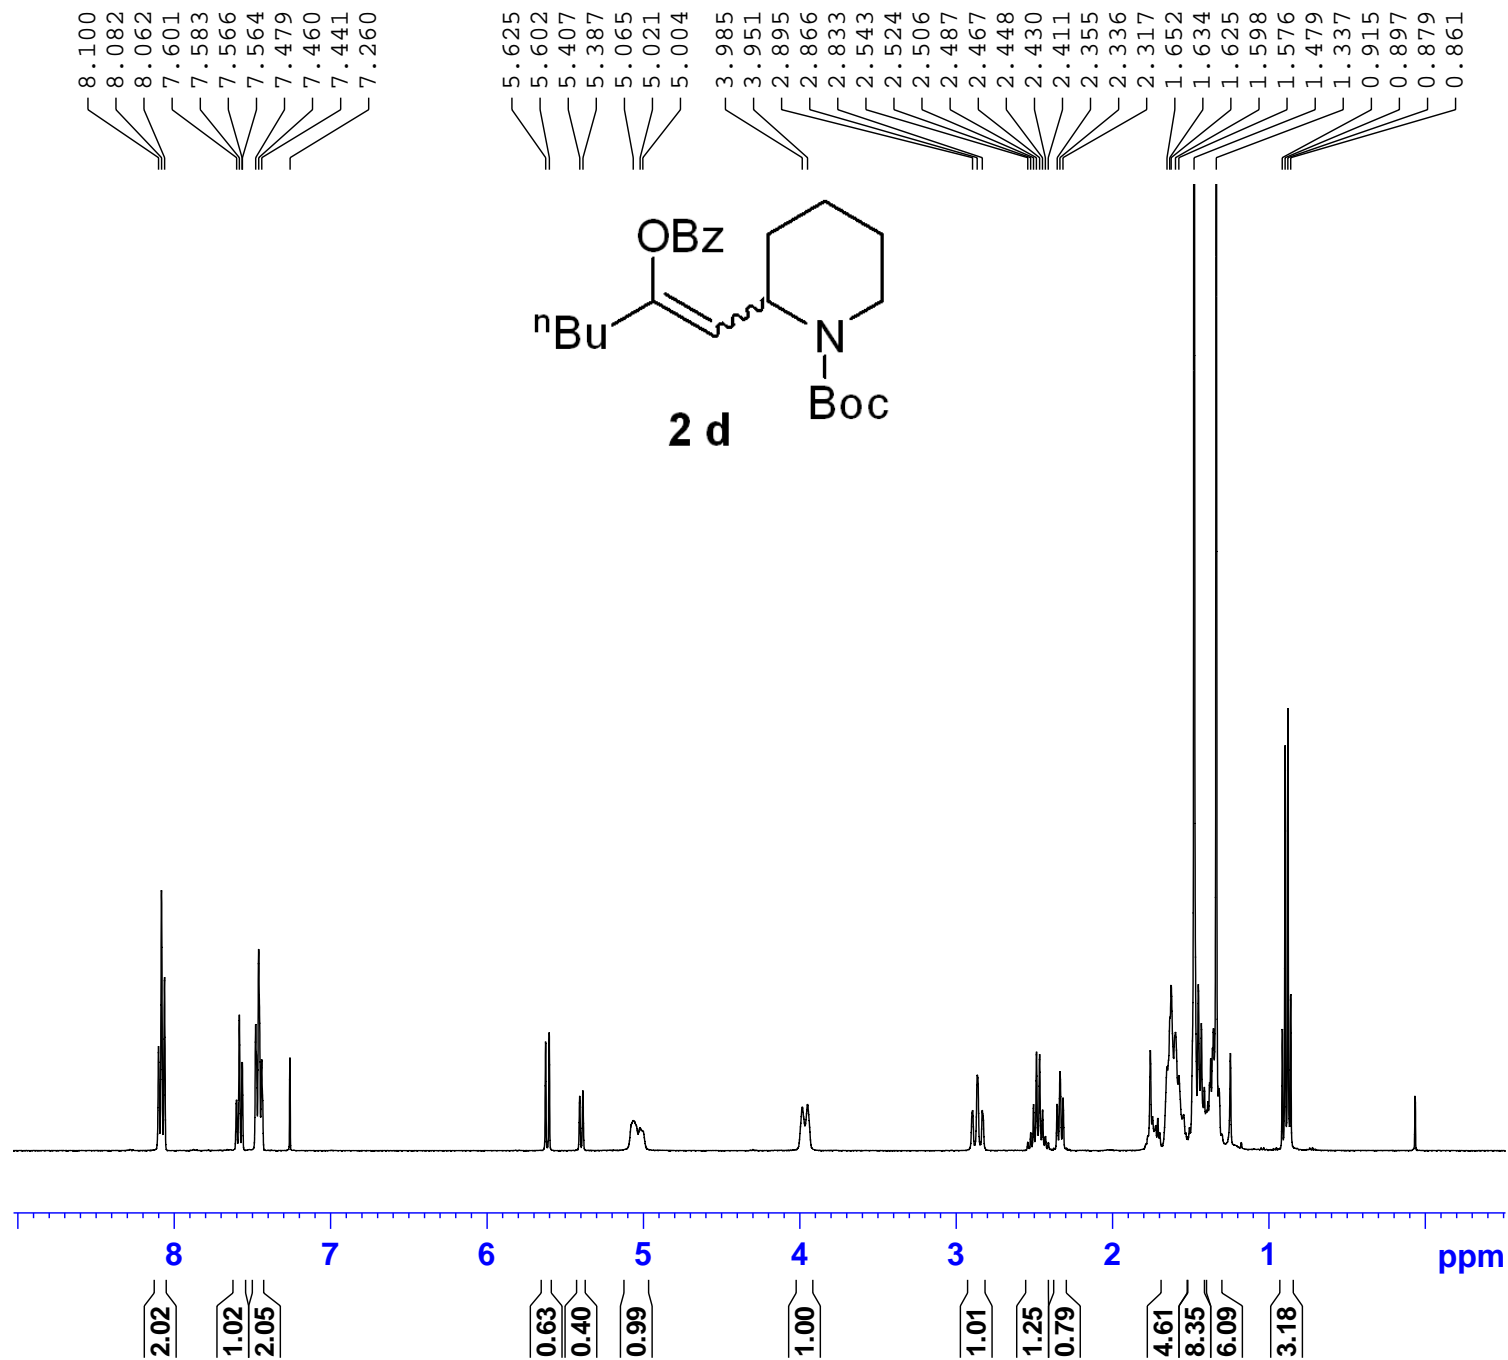

Current Data Parameters  
 NAME Jun30-2009 HJF 3-12803  
 EXPNO 10  
 PROCNO 1

F2 - Acquisition Parameters  
 Date\_ 20090701  
 Time 1.53  
 INSTRUM spect  
 PROBHD 5 mm PABBO BB-  
 PULPROG zg30  
 TD 65536  
 SOLVENT CDCl3  
 NS 16  
 DS 0  
 SWH 8223.685 Hz  
 FIDRES 0.125483 Hz  
 AQ 3.9846387 sec  
 RG 71.8  
 DW 60.800 usec  
 DE 6.50 usec  
 TE 295.9 K  
 D1 1.00000000 sec  
 TD0 1

===== CHANNEL f1 =====  
 NUC1 1H  
 P1 12.00 usec  
 PL1 -2.00 dB  
 SFO1 400.1324710 MHz

F2 - Processing parameters  
 SI 32768  
 SF 400.130093 MHz  
 WDW GM  
 SSB 0  
 LB -0.20 Hz  
 GB 0.1  
 PC 1.00

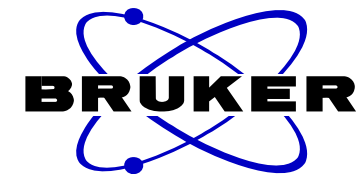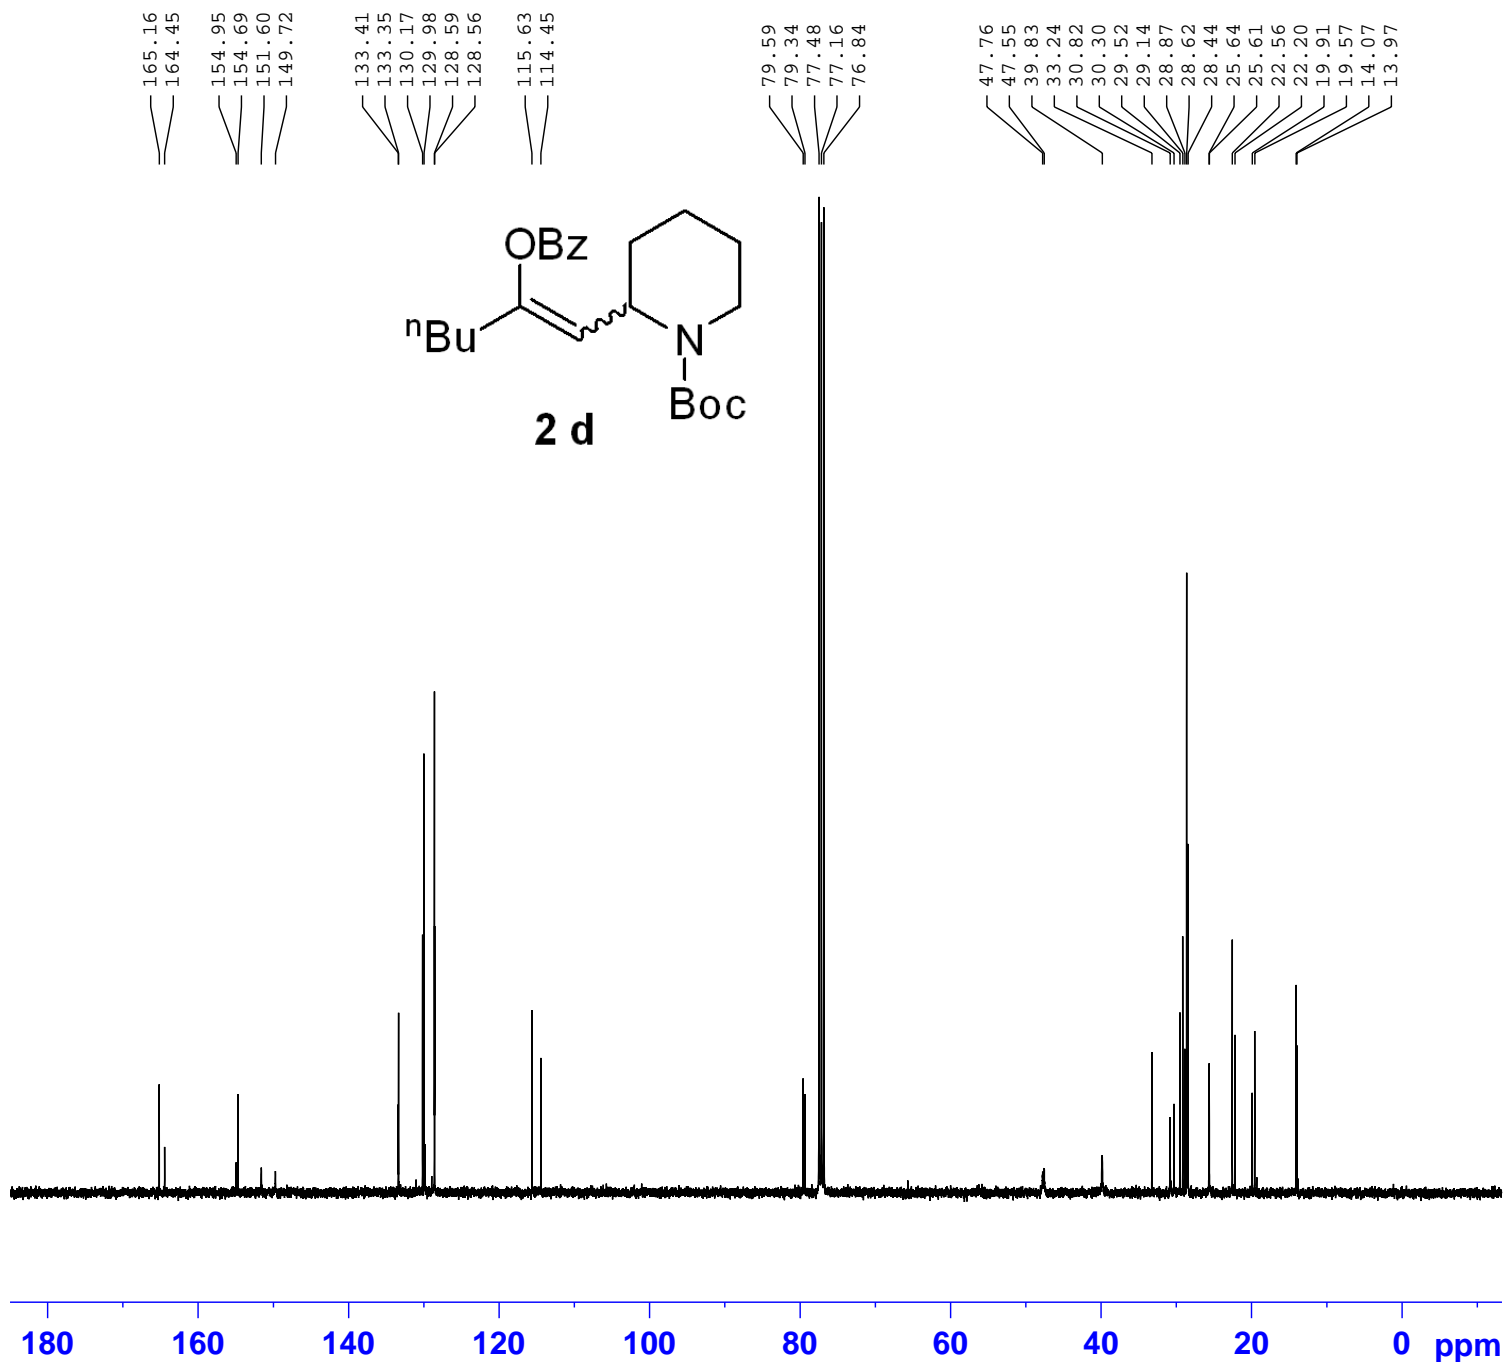

Current Data Parameters  
 NAME Jul13-2009 HJF3-12803  
 EXPNO 7  
 PROCNO 1

F2 - Acquisition Parameters  
 Date\_ 20090714  
 Time 4.14  
 INSTRUM spect  
 PROBHD 5 mm PABBO BB-  
 PULPROG zgpg30  
 TD 65536  
 SOLVENT CDC13  
 NS 512  
 DS 0  
 SWH 24038.461 Hz  
 FIDRES 0.366798 Hz  
 AQ 1.3631988 sec  
 RG 2050  
 DW 20.800 usec  
 DE 6.50 usec  
 TE 297.2 K  
 D1 2.00000000 sec  
 d11 0.03000000 sec  
 DELTA 1.89999998 sec  
 TD0 1

==== CHANNEL f1 =====  
 NUC1 13C  
 P1 15.50 usec  
 PL1 -1.00 dB  
 SFO1 100.6228298 MHz

==== CHANNEL f2 =====  
 CPDPRG2 waltz16  
 NUC2 1H  
 PCPD2 60.00 usec  
 PL12 11.35 dB  
 PL13 13.05 dB  
 PL2 -2.00 dB  
 SFO2 400.1316005 MHz

F2 - Processing parameters  
 SI 32768  
 SF 100.6127570 MHz  
 WDW EM  
 SSB 0  
 LB 0.60 Hz  
 GB 0  
 PC 1.40

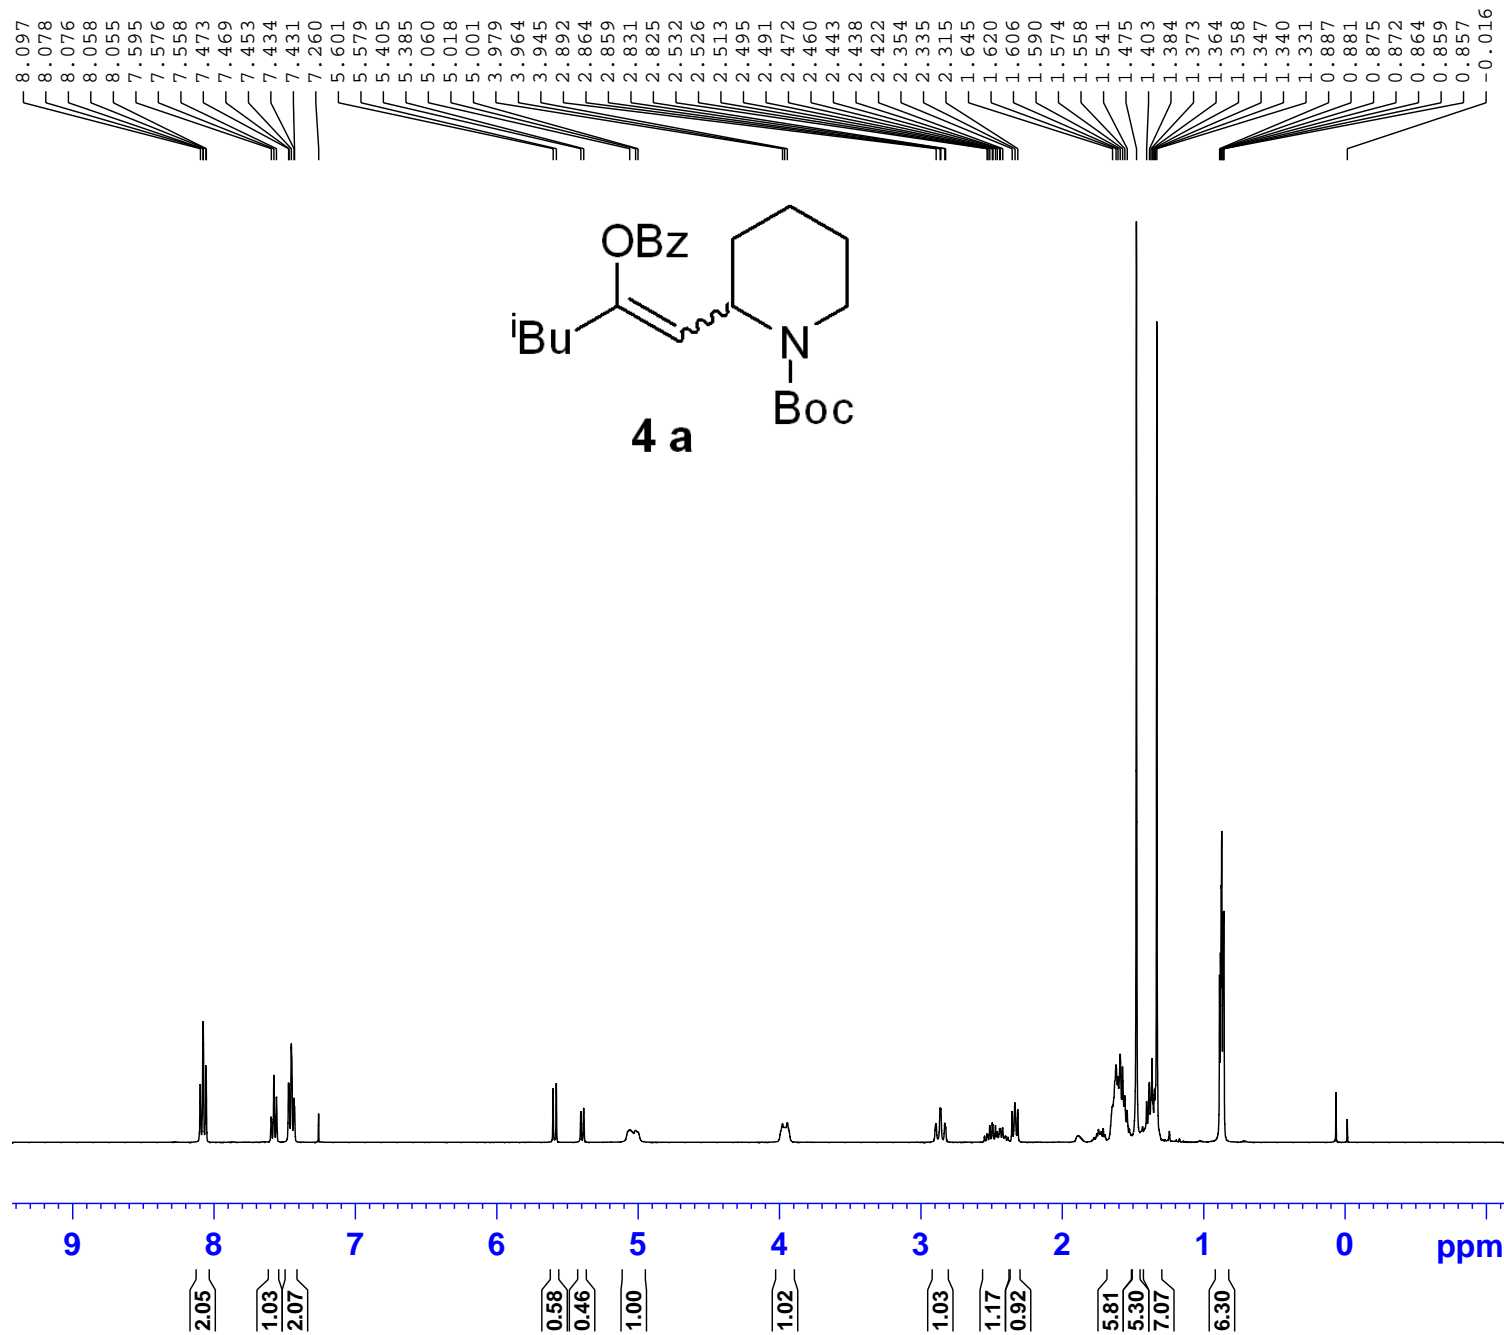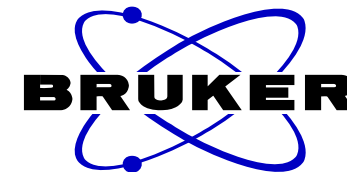

Current Data Parameters  
 NAME Nov11-2009 HJF 4-5002  
 EXPNO 12  
 PROCNO 1

F2 - Acquisition Parameters  
 Date\_ 20091112  
 Time 2.59  
 INSTRUM spect  
 PROBHD 5 mm PABBO BB-  
 PULPROG zg30  
 TD 65536  
 SOLVENT CDCl3  
 NS 8  
 DS 0  
 SWH 8223.685 Hz  
 FIDRES 0.125483 Hz  
 AQ 3.9846387 sec  
 RG 50.8  
 DW 60.800 usec  
 DE 6.50 usec  
 TE 295.9 K  
 D1 1.00000000 sec  
 TD0 1

==== CHANNEL f1 =====  
 NUC1 1H  
 P1 12.00 usec  
 PL1 -2.00 dB  
 SFO1 400.1324710 MHz

F2 - Processing parameters  
 SI 32768  
 SF 400.1300094 MHz  
 WDW GM  
 SSB 0  
 LB -0.20 Hz  
 GB 0.1  
 PC 1.00

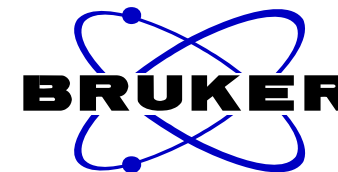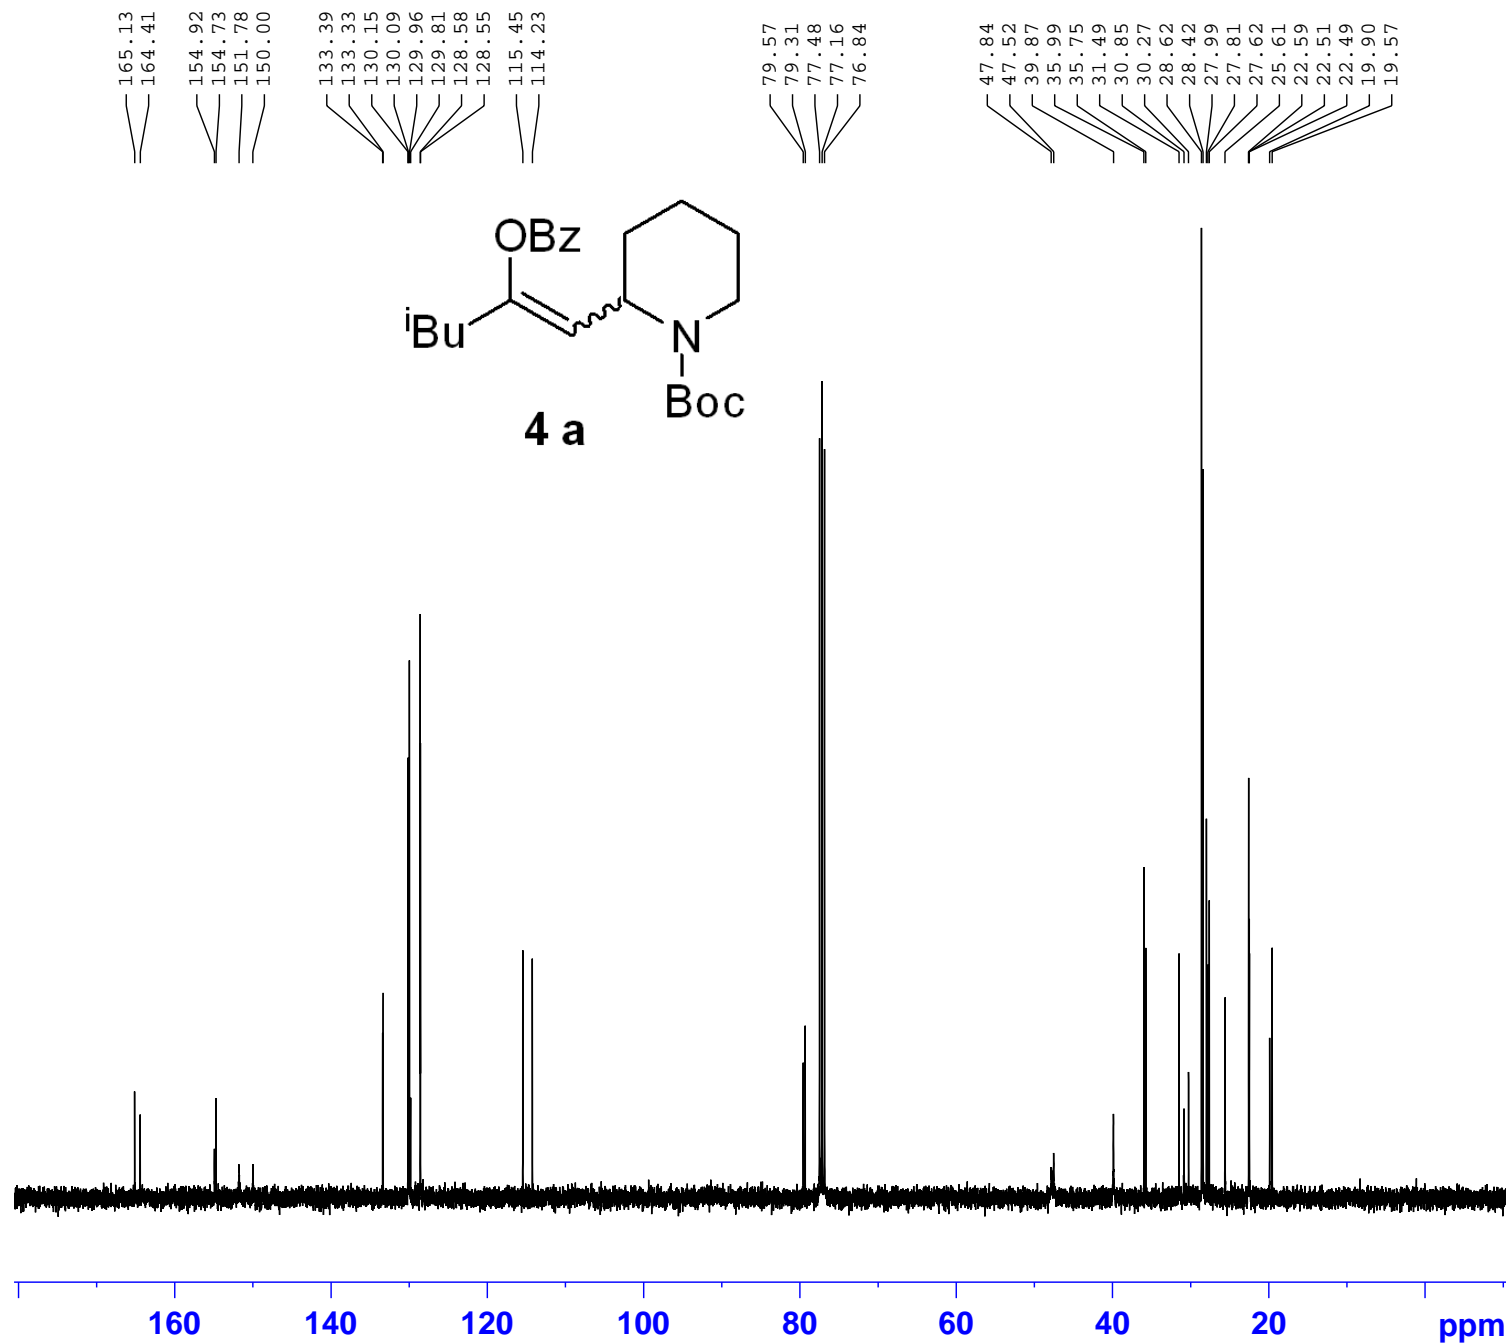

Current Data Parameters  
 NAME Nov17-2009 HJF 4-5002  
 EXPNO 14  
 PROCNO 1

F2 - Acquisition Parameters  
 Date\_ 20091118  
 Time 3.17  
 INSTRUM spect  
 PROBHD 5 mm PABBO BB-  
 PULPROG zgpg30  
 TD 65536  
 SOLVENT CDCl3  
 NS 128  
 DS 0  
 SWH 24038.461 Hz  
 FIDRES 0.366798 Hz  
 AQ 1.3631988 sec  
 RG 2050  
 DW 20.800 usec  
 DE 6.50 usec  
 TE 297.3 K  
 D1 2.00000000 sec  
 d11 0.03000000 sec  
 DELTA 1.89999998 sec  
 TD0 1

==== CHANNEL f1 =====  
 NUC1 13C  
 P1 15.50 usec  
 PL1 -1.00 dB  
 SFO1 100.6228298 MHz

==== CHANNEL f2 =====  
 CPDPRG2 waltz16  
 NUC2 1H  
 PCPD2 60.00 usec  
 PL12 11.35 dB  
 PL13 13.05 dB  
 PL2 -2.00 dB  
 SFO2 400.1316005 MHz

F2 - Processing parameters  
 SI 32768  
 SF 100.6127583 MHz  
 WDW EM  
 SSB 0  
 LB 0.60 Hz  
 GB 0  
 PC 1.40

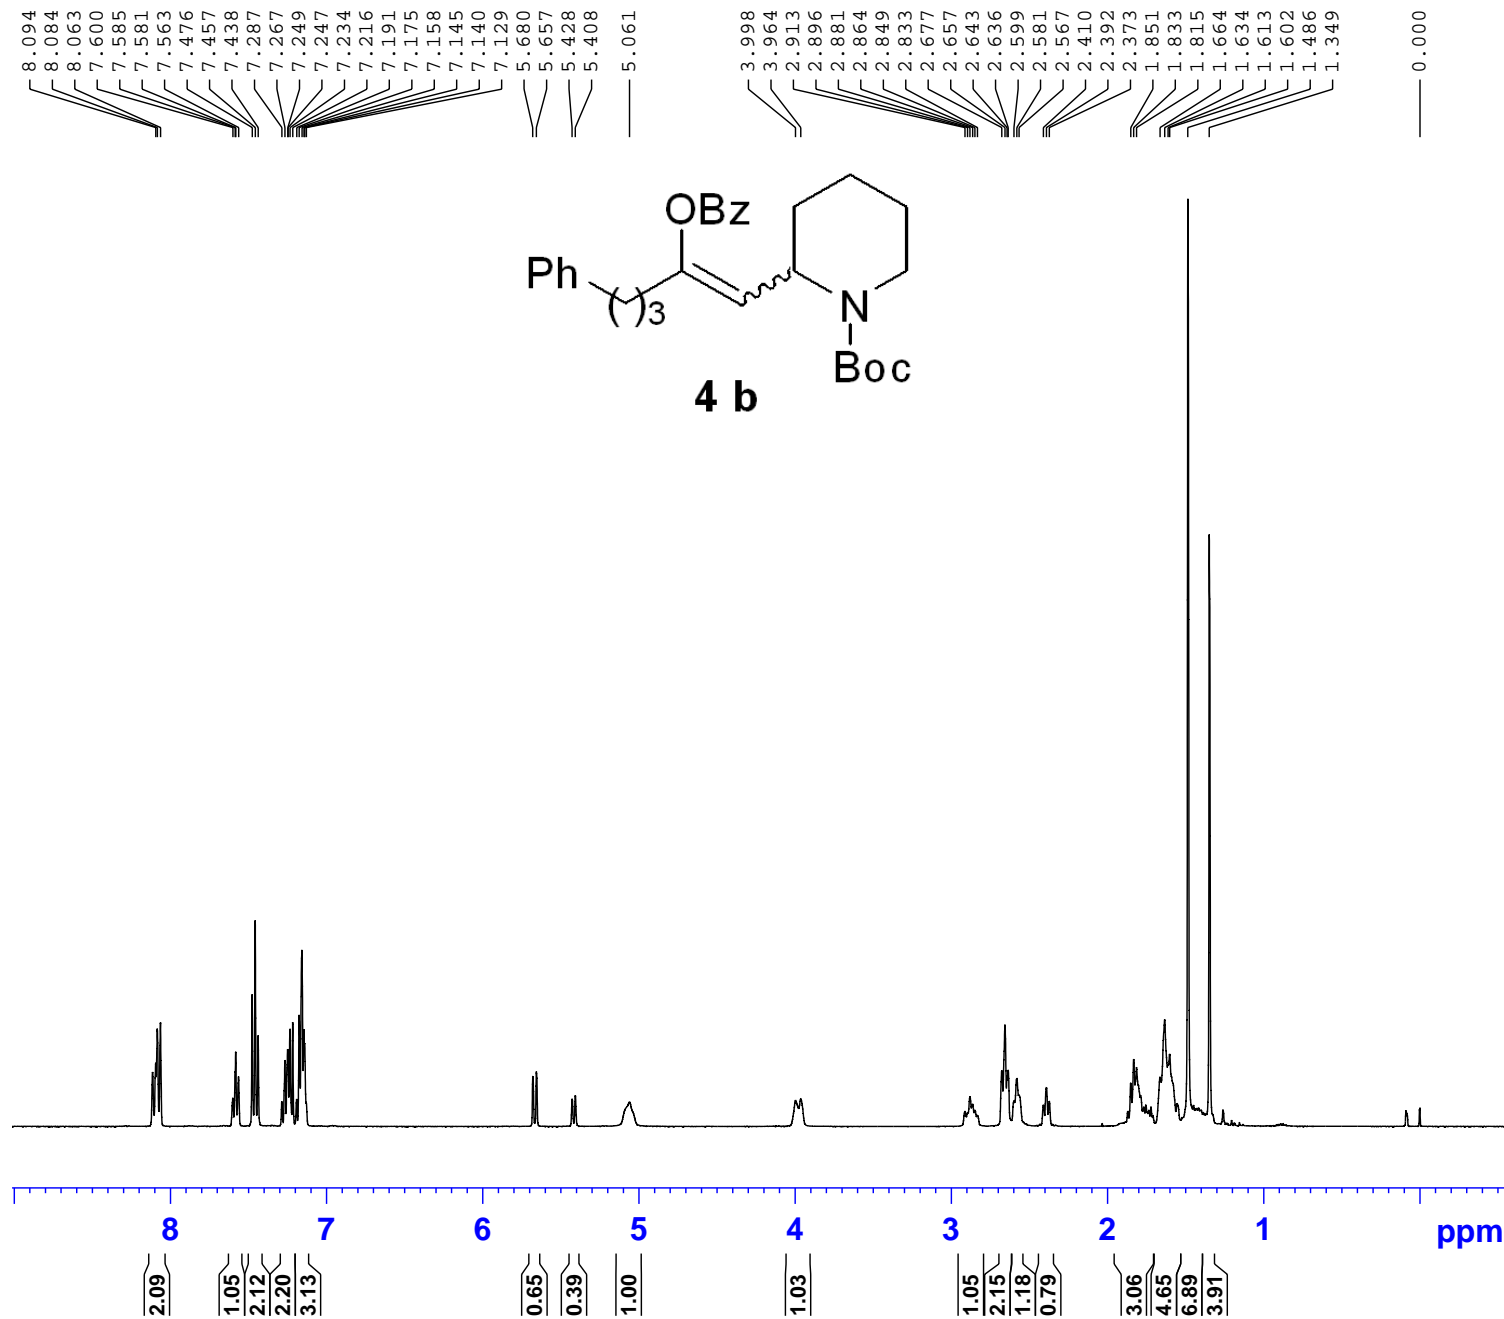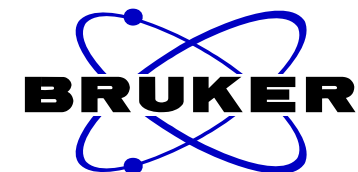

Current Data Parameters  
 NAME Nov11-2009 HJF 4-5001  
 EXPNO 11  
 PROCNO 1

F2 - Acquisition Parameters  
 Date\_ 20091112  
 Time 2.54  
 INSTRUM spect  
 PROBHD 5 mm PABBO BB-  
 PULPROG zg30  
 TD 65536  
 SOLVENT CDCl3  
 NS 8  
 DS 0  
 SWH 8223.685 Hz  
 FIDRES 0.125483 Hz  
 AQ 3.9846387 sec  
 RG 45.2  
 DW 60.800 usec  
 DE 6.50 usec  
 TE 296.0 K  
 D1 1.00000000 sec  
 TD0 1

===== CHANNEL f1 =====  
 NUC1 1H  
 P1 12.00 usec  
 PL1 -2.00 dB  
 SFO1 400.1324710 MHz

F2 - Processing parameters  
 SI 32768  
 SF 400.1300151 MHz  
 WDW GM  
 SSB 0  
 LB -0.20 Hz  
 GB 0.1  
 PC 1.00

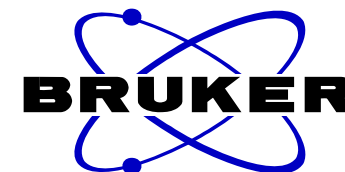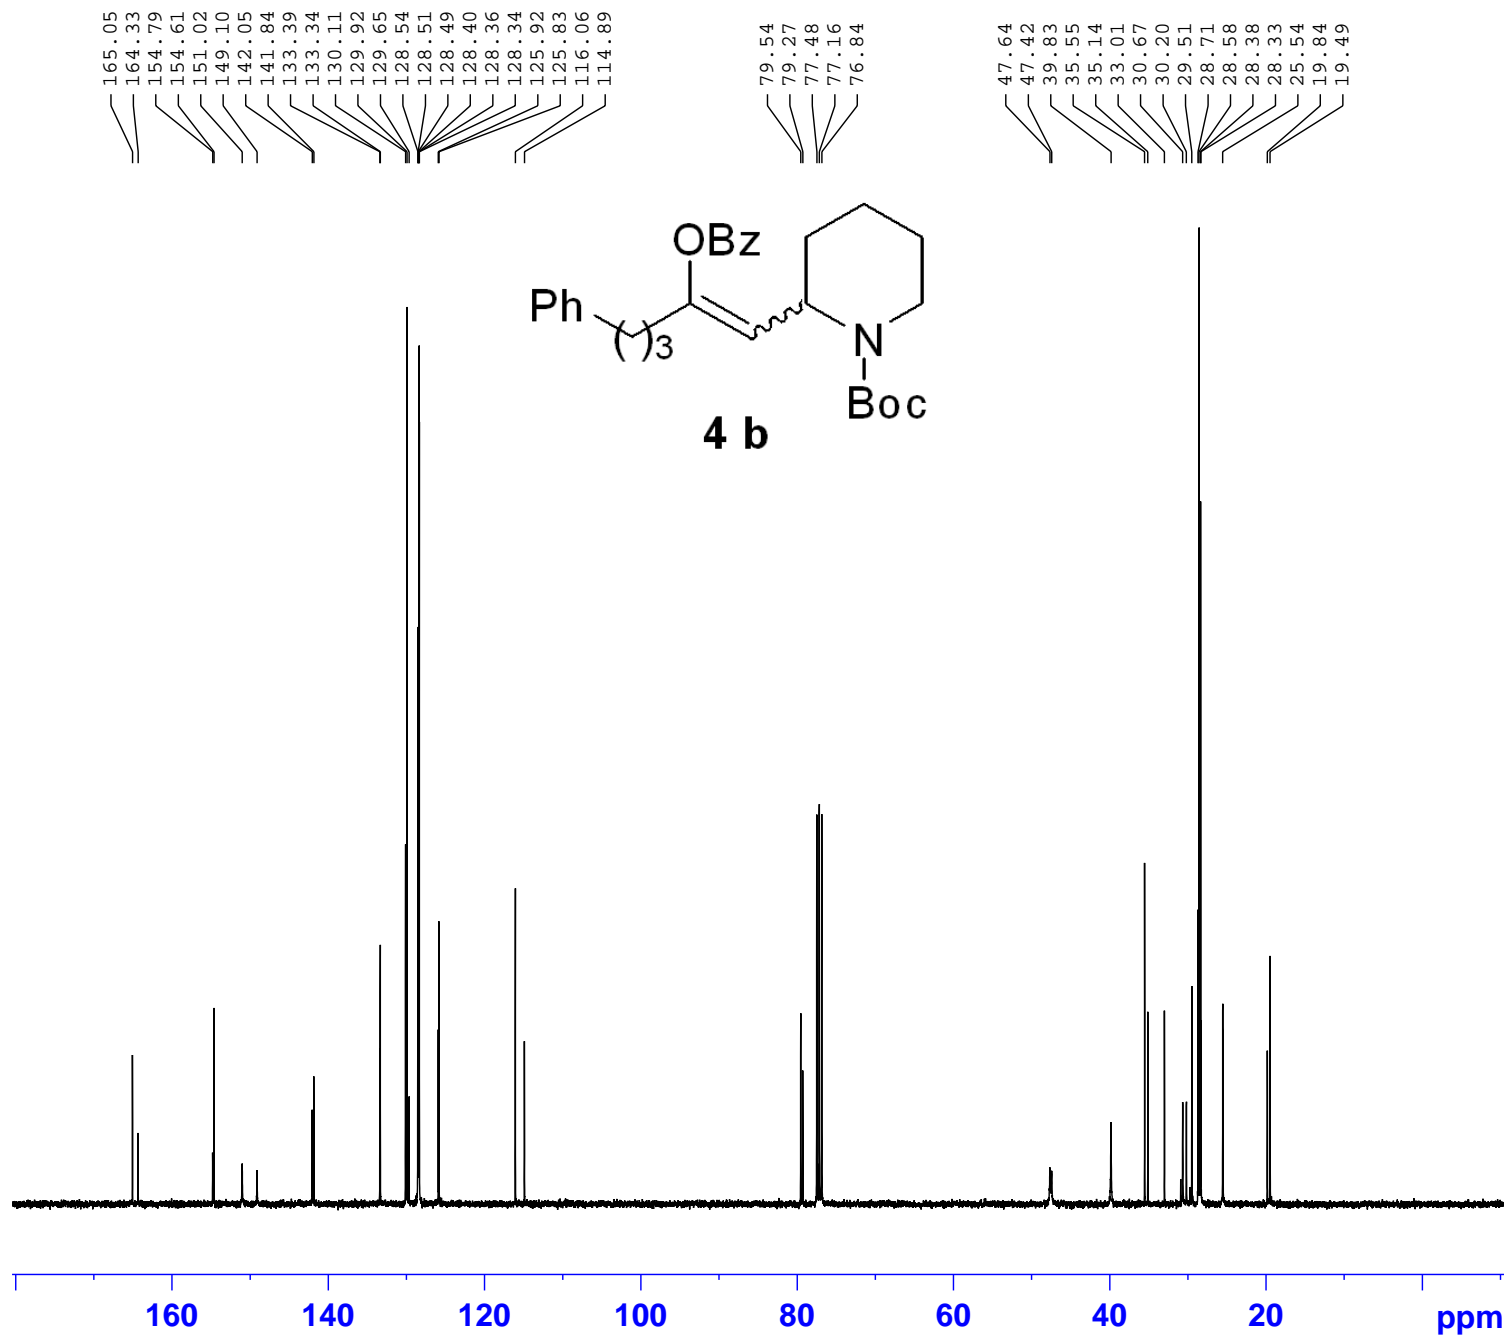

Current Data Parameters  
 NAME 2009-11-20 HJF-4-5001  
 EXPNO 2  
 PROCNO 1

F2 - Acquisition Parameters  
 Date\_ 20091121  
 Time 5.08  
 INSTRUM spect  
 PROBHD 5 mm PABBO BB-  
 PULPROG zgpg30  
 TD 65536  
 SOLVENT CDCl3  
 NS 512  
 DS 0  
 SWH 24038.461 Hz  
 FIDRES 0.366798 Hz  
 AQ 1.3631988 sec  
 RG 181  
 DW 20.800 usec  
 DE 6.50 usec  
 TE 296.8 K  
 D1 2.00000000 sec  
 d11 0.03000000 sec  
 DELTA 1.89999998 sec  
 TD0 1

==== CHANNEL f1 =====  
 NUC1 13C  
 P1 15.50 usec  
 PL1 -1.00 dB  
 SFO1 100.6228298 MHz

==== CHANNEL f2 =====  
 CPDPRG2 waltz16  
 NUC2 1H  
 PCPD2 60.00 usec  
 PL12 11.35 dB  
 PL13 13.05 dB  
 PL2 -2.00 dB  
 SFO2 400.1316005 MHz

F2 - Processing parameters  
 SI 32768  
 SF 100.6127681 MHz  
 WDW EM  
 SSB 0  
 LB 0.60 Hz  
 GB 0  
 PC 1.40

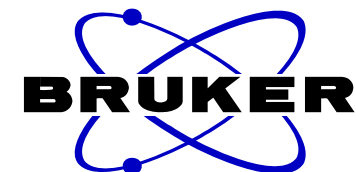

Current Data Parameters  
 NAME Nov09-2009 HJF 4-3804  
 EXPNO 6  
 PROCNO 1

F2 - Acquisition Parameters  
 Date\_ 20091110  
 Time 1.36  
 INSTRUM spect  
 PROBHD 5 mm PABBO BB-  
 PULPROG zg30  
 TD 65536  
 SOLVENT CDCl3  
 NS 8  
 DS 0  
 SWH 8223.685 Hz  
 FIDRES 0.125483 Hz  
 AQ 3.9846387 sec  
 RG 64  
 DW 60.800 usec  
 DE 6.50 usec  
 TE 296.4 K  
 D1 1.00000000 sec  
 TD0 1

==== CHANNEL f1 =====  
 NUC1 1H  
 P1 12.00 usec  
 PL1 -2.00 dB  
 SFO1 400.1324710 MHz

F2 - Processing parameters  
 SI 32768  
 SF 400.1300092 MHz  
 WDW GM  
 SSB 0  
 LB -0.20 Hz  
 GB 0.1  
 PC 1.00

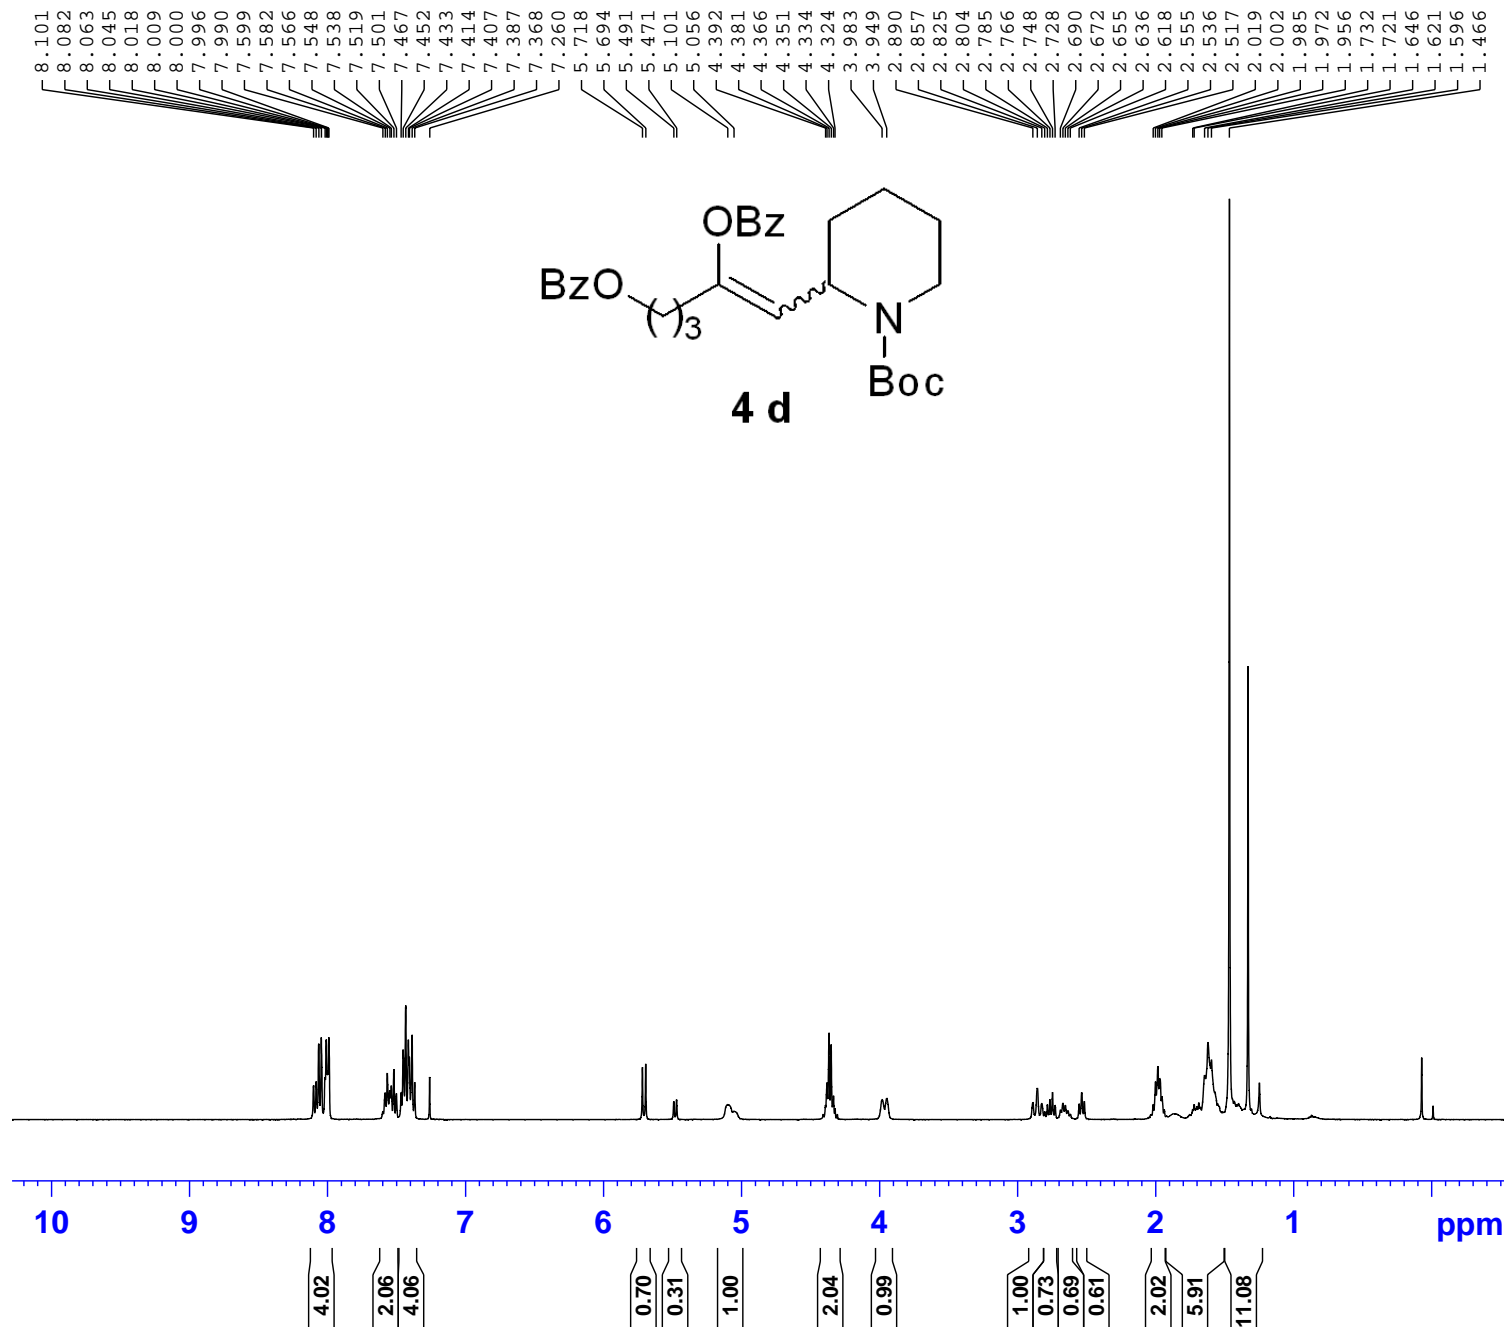

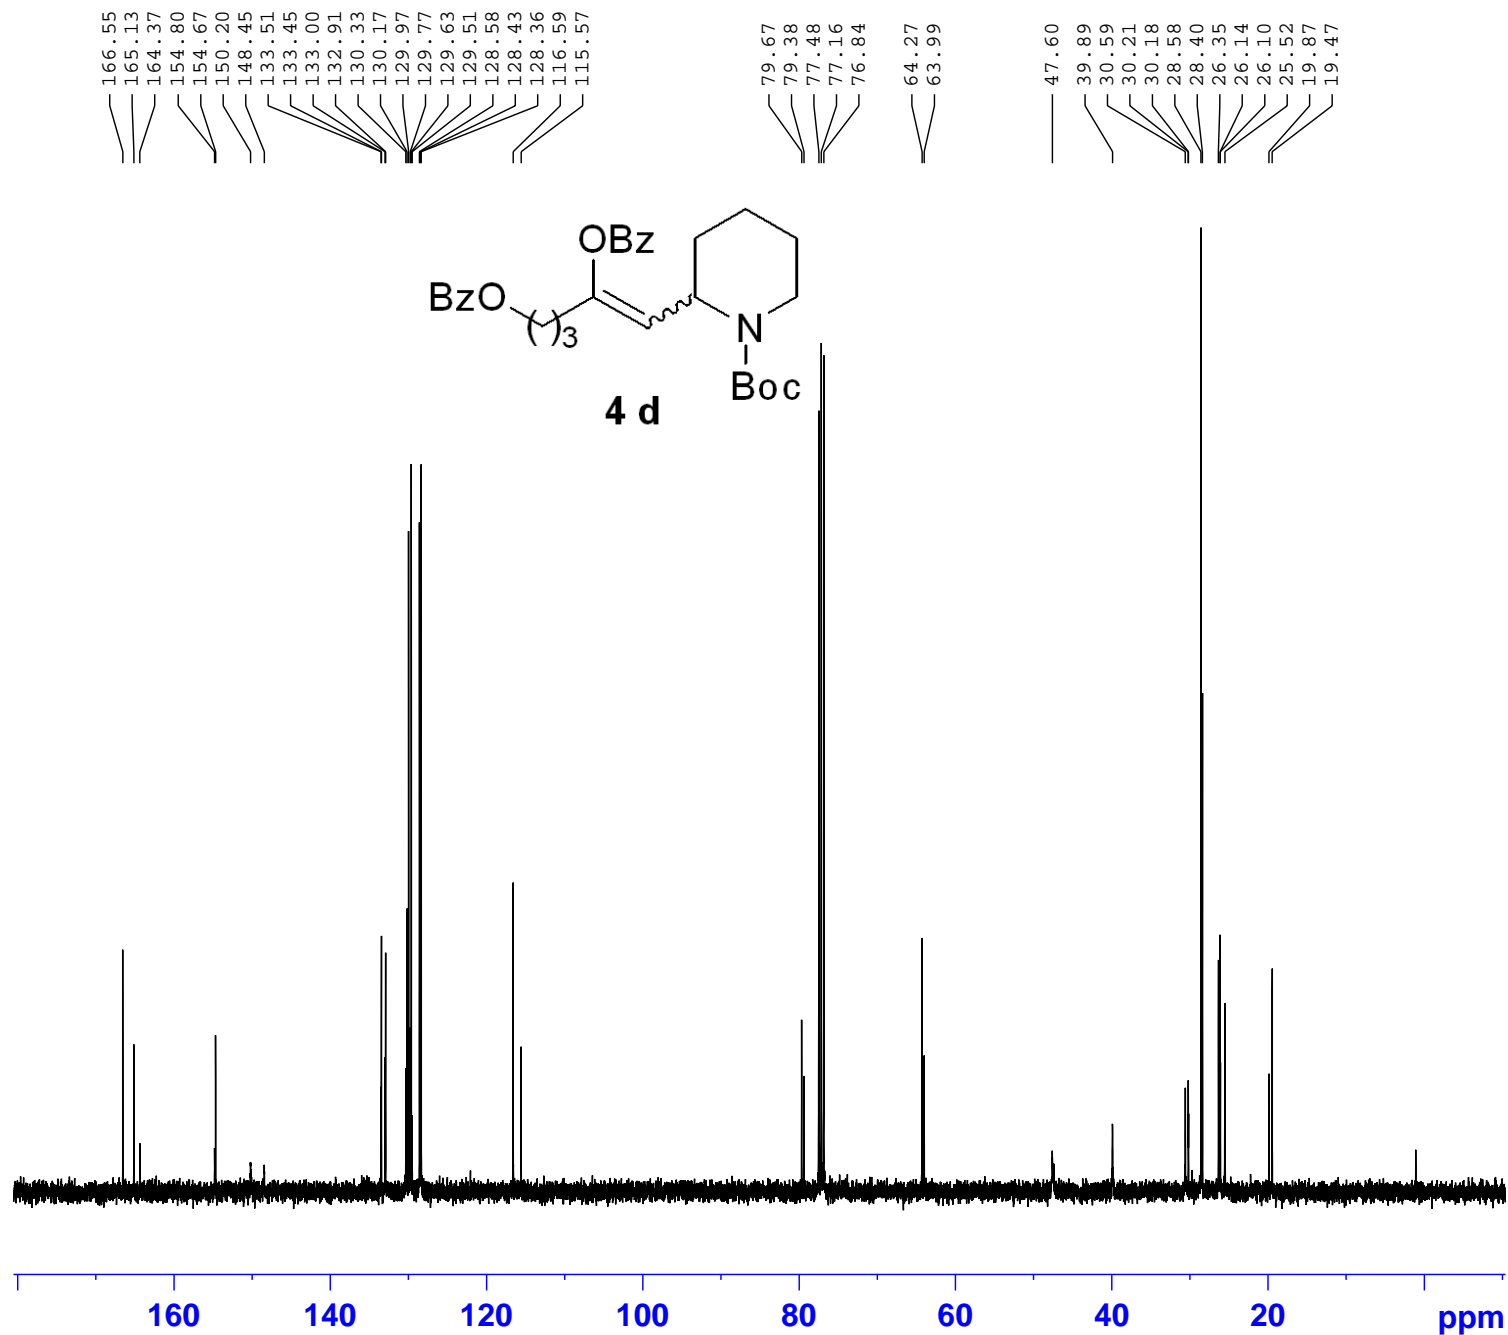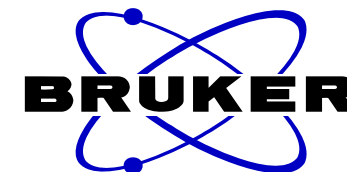

Current Data Parameters  
NAME Nov17-2009 HJF 4-3804  
EXPNO 15  
PROCNO 1

F2 - Acquisition Parameters  
Date\_ 20091118  
Time 3.29  
INSTRUM spect  
PROBHD 5 mm PABBO BB-  
PULPROG zgpg30  
TD 65536  
SOLVENT CDCl3  
NS 128  
DS 0  
SWH 24038.461 Hz  
FIDRES 0.366798 Hz  
AQ 1.3631988 sec  
RG 2050  
DW 20.800 usec  
DE 6.50 usec  
TE 297.6 K  
D1 2.00000000 sec  
d11 0.03000000 sec  
DELTA 1.89999998 sec  
TD0 1

==== CHANNEL f1 =====  
NUC1 13C  
P1 15.50 usec  
PL1 -1.00 dB  
SFO1 100.6228298 MHz

==== CHANNEL f2 =====  
CPDPRG2 waltz16  
NUC2 1H  
PCPD2 60.00 usec  
PL12 11.35 dB  
PL13 13.05 dB  
PL2 -2.00 dB  
SFO2 400.1316005 MHz

F2 - Processing parameters  
SI 32768  
SF 100.6127612 MHz  
WDW EM  
SSB 0  
LB 0.60 Hz  
GB 0  
PC 1.40



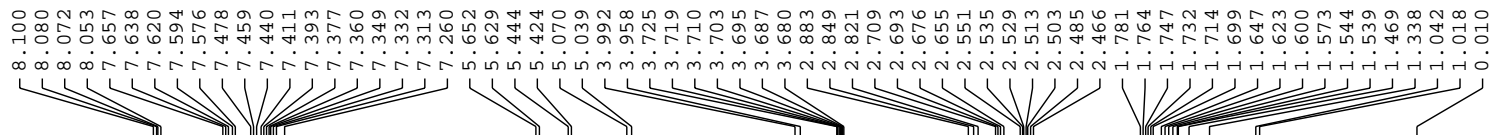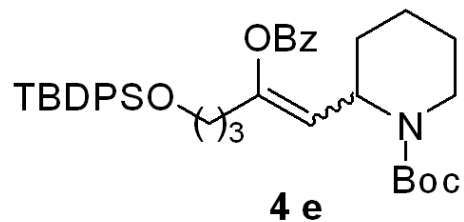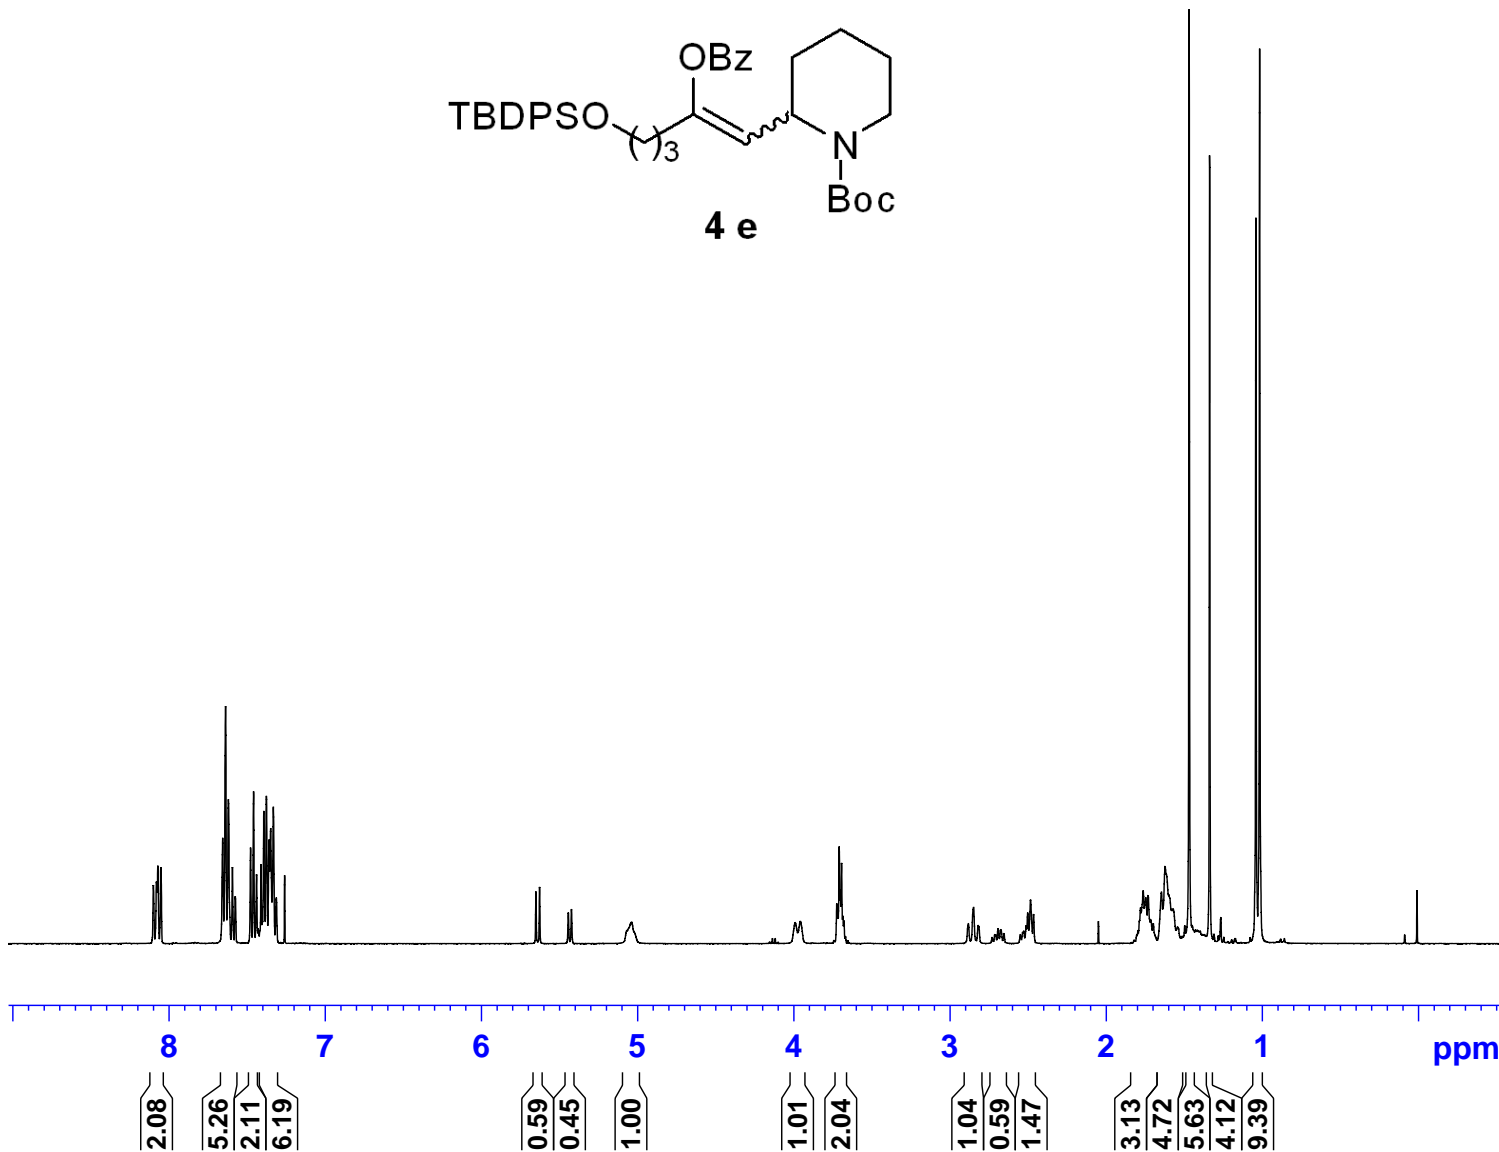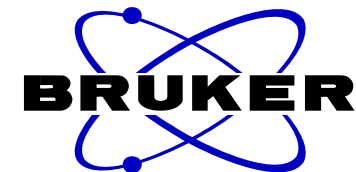

Current Data Parameters  
NAME Oct23-2009 HJF 4-3803  
EXPNO 4  
PROCNO 1

F2 - Acquisition Parameters  
Date\_ 20091024  
Time 3.44  
INSTRUM spect  
PROBHD 5 mm PABBO BB-  
PULPROG zg30  
TD 65536  
SOLVENT CDCl3  
NS 16  
DS 0  
SWH 8223.685 Hz  
FIDRES 0.125483 Hz  
AQ 3.9846387 sec  
RG 71.8  
DW 60.800 usec  
DE 6.50 usec  
TE 296.1 K  
D1 1.00000000 sec  
TD0 1

==== CHANNEL f1 =====  
NUC1 1H  
P1 12.00 usec  
PL1 -2.00 dB  
SFO1 400.1324710 MHz

F2 - Processing parameters  
SI 32768  
SF 400.1300094 MHz  
WDW GM  
SSB 0  
LB -0.20 Hz  
GB 0.1  
PC 1.00

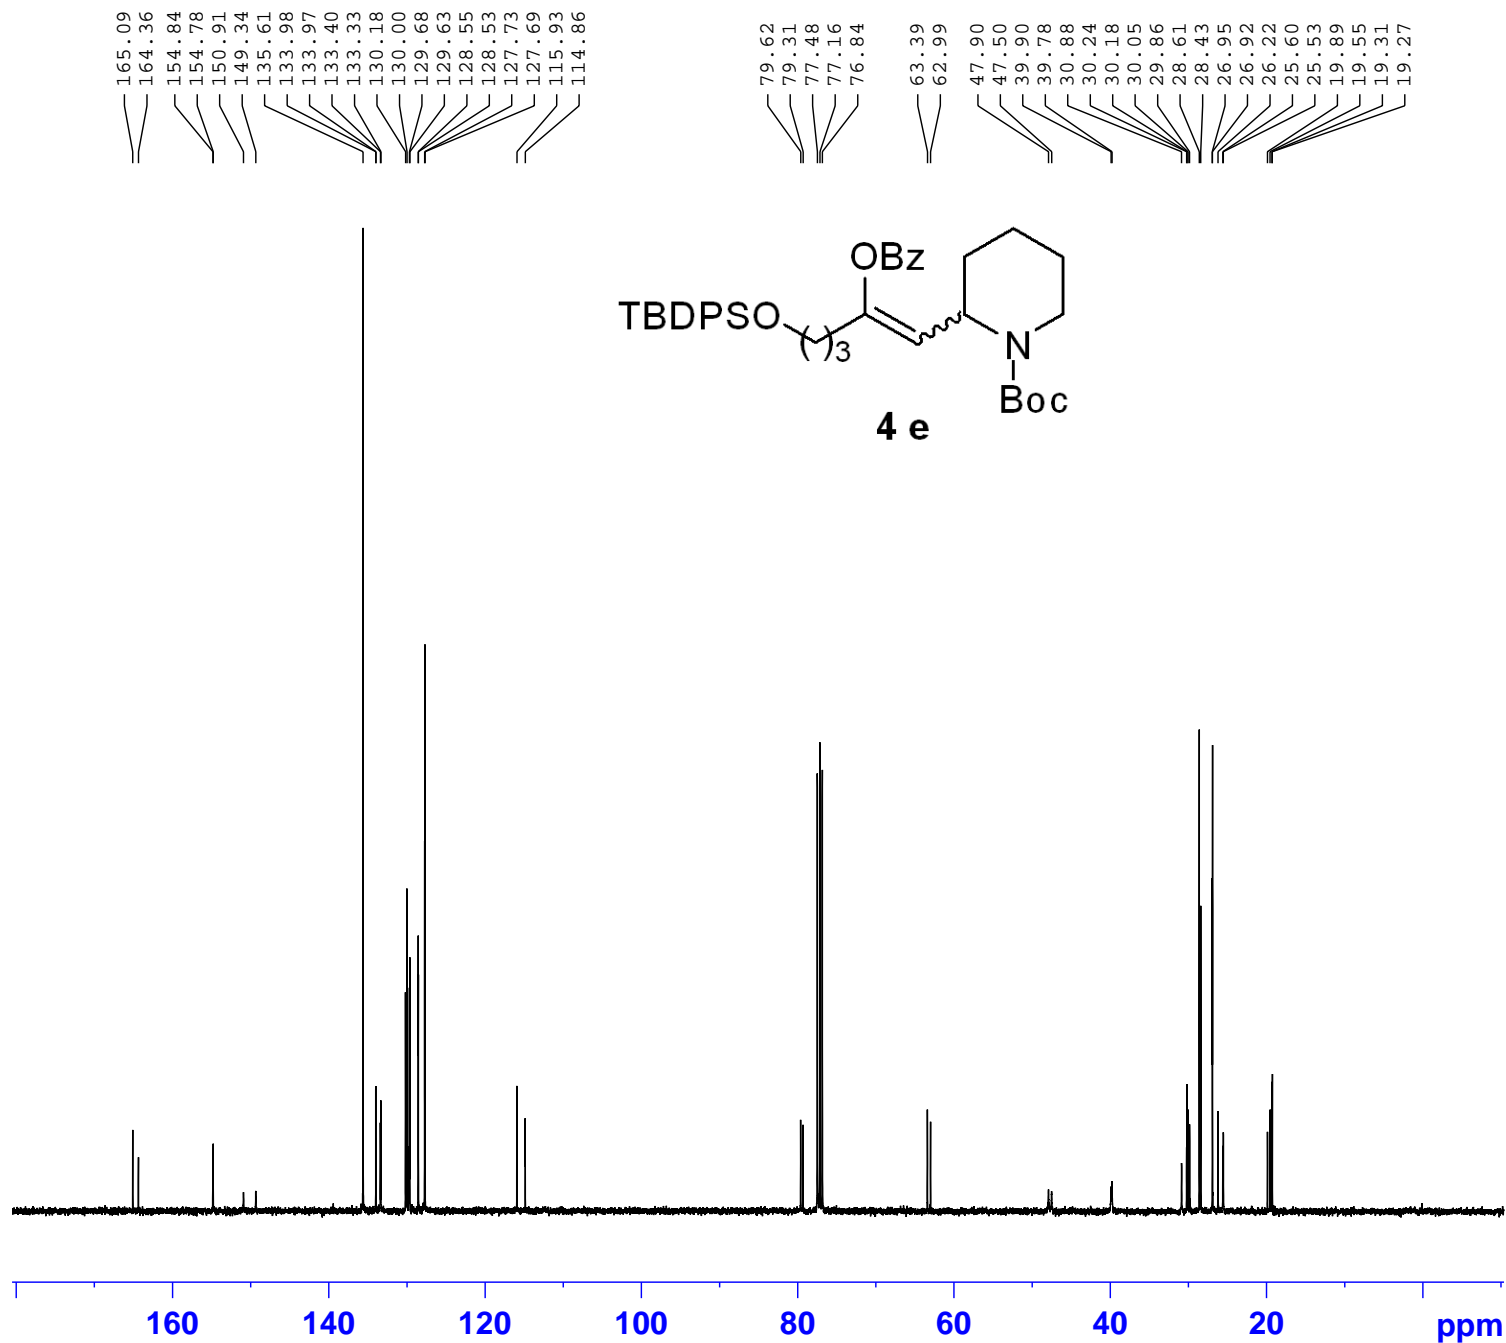

Current Data Parameters  
 NAME 2009-11-11 HJF4-3803  
 EXPNO 2  
 PROCNO 1

F2 - Acquisition Parameters  
 Date\_ 20091111  
 Time 21.50  
 INSTRUM spect  
 PROBHD 5 mm PABBO BB-  
 PULPROG zgpg30  
 TD 65536  
 SOLVENT CDC13  
 NS 512  
 DS 0  
 SWH 24038.461 Hz  
 FIDRES 0.366798 Hz  
 AQ 1.3631988 sec  
 RG 181  
 DW 20.800 usec  
 DE 6.50 usec  
 TE 297.4 K  
 D1 2.0000000 sec  
 d11 0.0300000 sec  
 DELTA 1.89999998 sec  
 TD0 1

==== CHANNEL f1 =====  
 NUC1 13C  
 P1 15.50 usec  
 PL1 -1.00 dB  
 SFO1 100.6228298 MHz

==== CHANNEL f2 =====  
 CPDPRG2 waltz16  
 NUC2 1H  
 PCPD2 60.00 usec  
 PL12 11.35 dB  
 PL13 13.05 dB  
 PL2 -2.00 dB  
 SFO2 400.1316005 MHz

F2 - Processing parameters  
 SI 32768  
 SF 100.6127613 MHz  
 WDW EM  
 SSB 0  
 LB 0.60 Hz  
 GB 0  
 PC 1.40

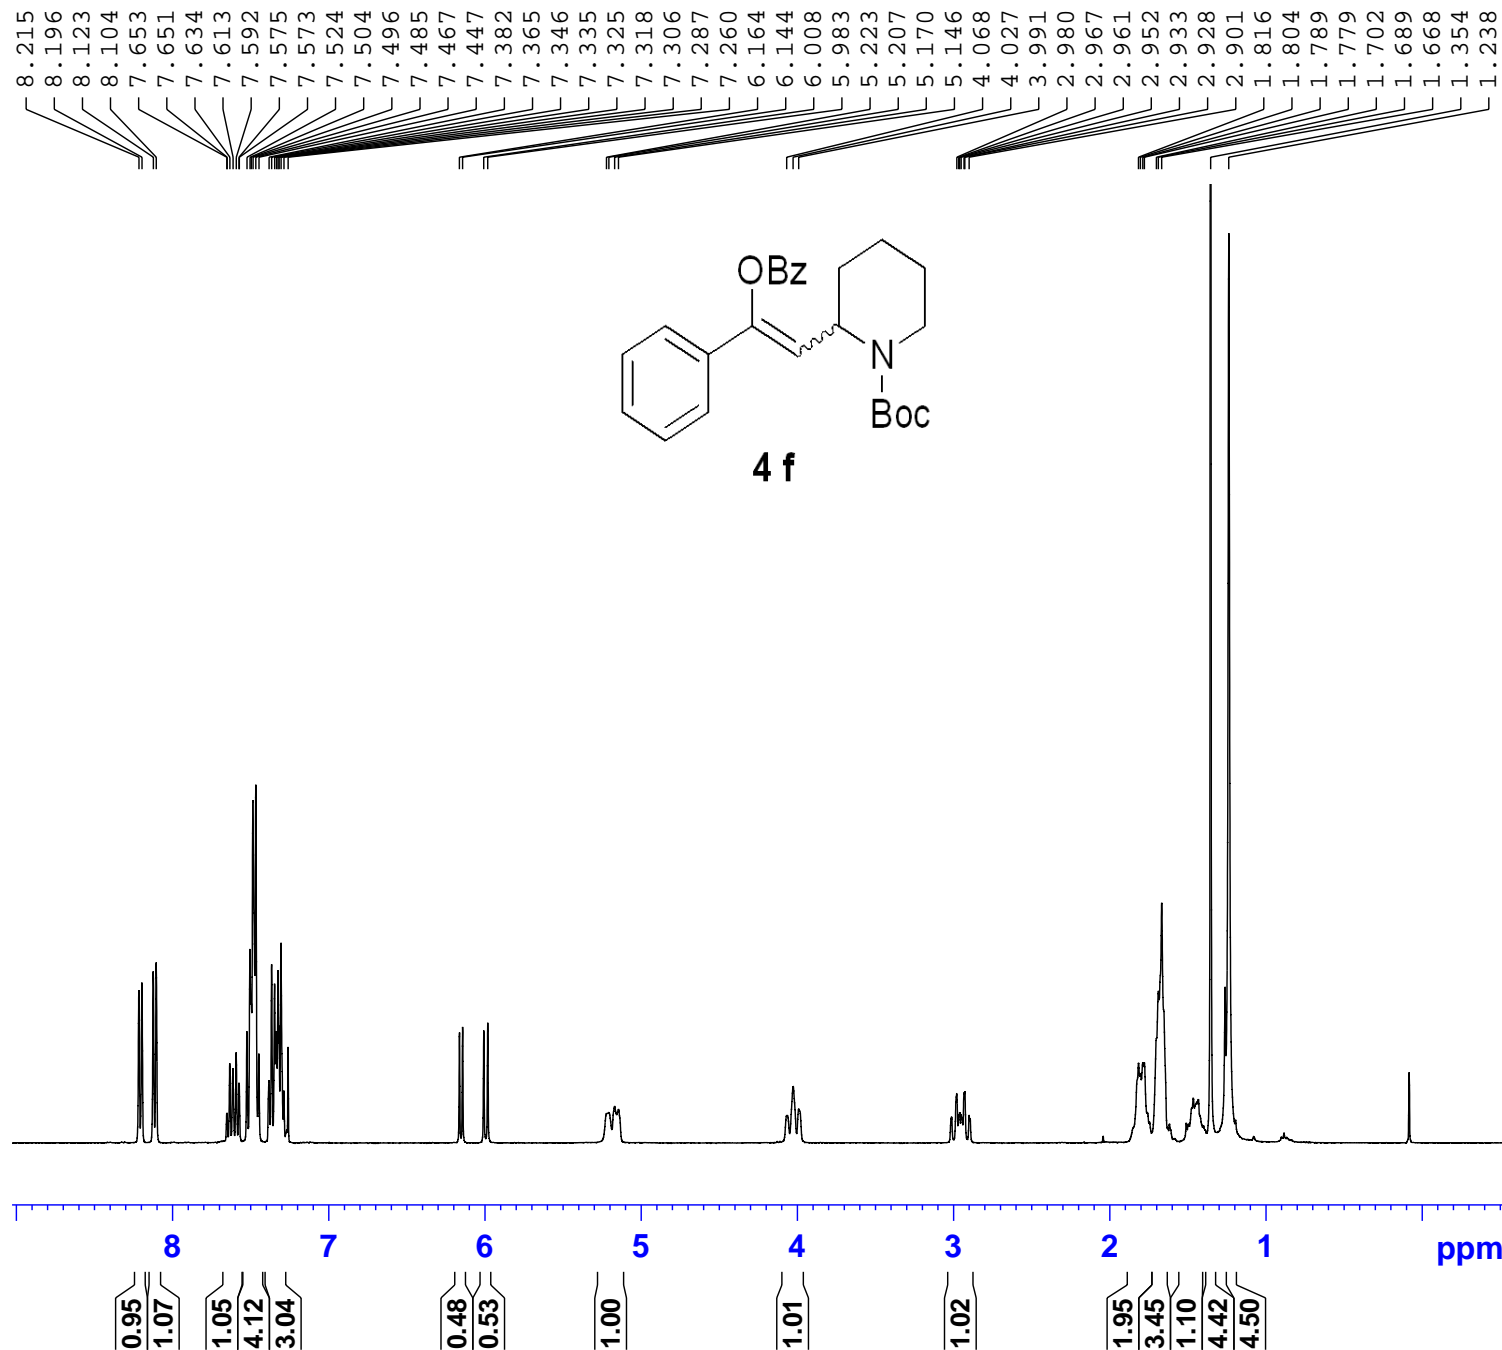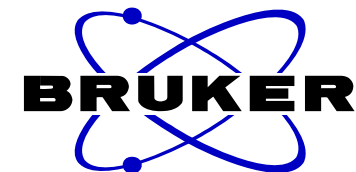

Current Data Parameters

NAME Jun30-2009 HJF 3-12805  
EXPNO 8  
PROCNO 1

F2 - Acquisition Parameters

Date\_ 20090701  
Time 1.59  
INSTRUM spect  
PROBHD 5 mm PABBO BB-  
PULPROG zg30  
TD 65536  
SOLVENT CDCl3  
NS 16  
DS 0  
SWH 8223.685 Hz  
FIDRES 0.125483 Hz  
AQ 3.9846387 sec  
RG 71.8  
DW 60.800 usec  
DE 6.50 usec  
TE 295.8 K  
D1 1.00000000 sec  
TD0 1

==== CHANNEL f1 =====

NUC1 1H  
P1 12.00 usec  
PL1 -2.00 dB  
SFO1 400.1324710 MHz

F2 - Processing parameters

SI 32768  
SF 400.130093 MHz  
WDW GM  
SSB 0  
LB -0.20 Hz  
GB 0.1  
PC 1.00



165.24  
164.37  
154.89  
147.59  
147.12  
134.93  
134.30  
133.68  
133.51  
130.35  
130.08  
129.33  
128.91  
128.68  
128.66  
128.59  
128.45  
128.19  
124.87  
117.11  
115.94

79.53  
79.49  
77.48  
77.16  
76.84

48.37  
48.15  
40.09  
39.37  
30.98  
30.20  
28.40  
28.22  
25.57  
25.45  
20.09  
19.73

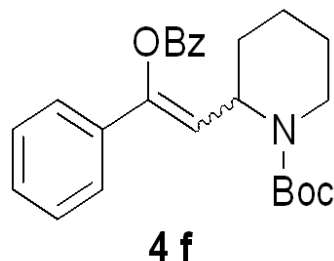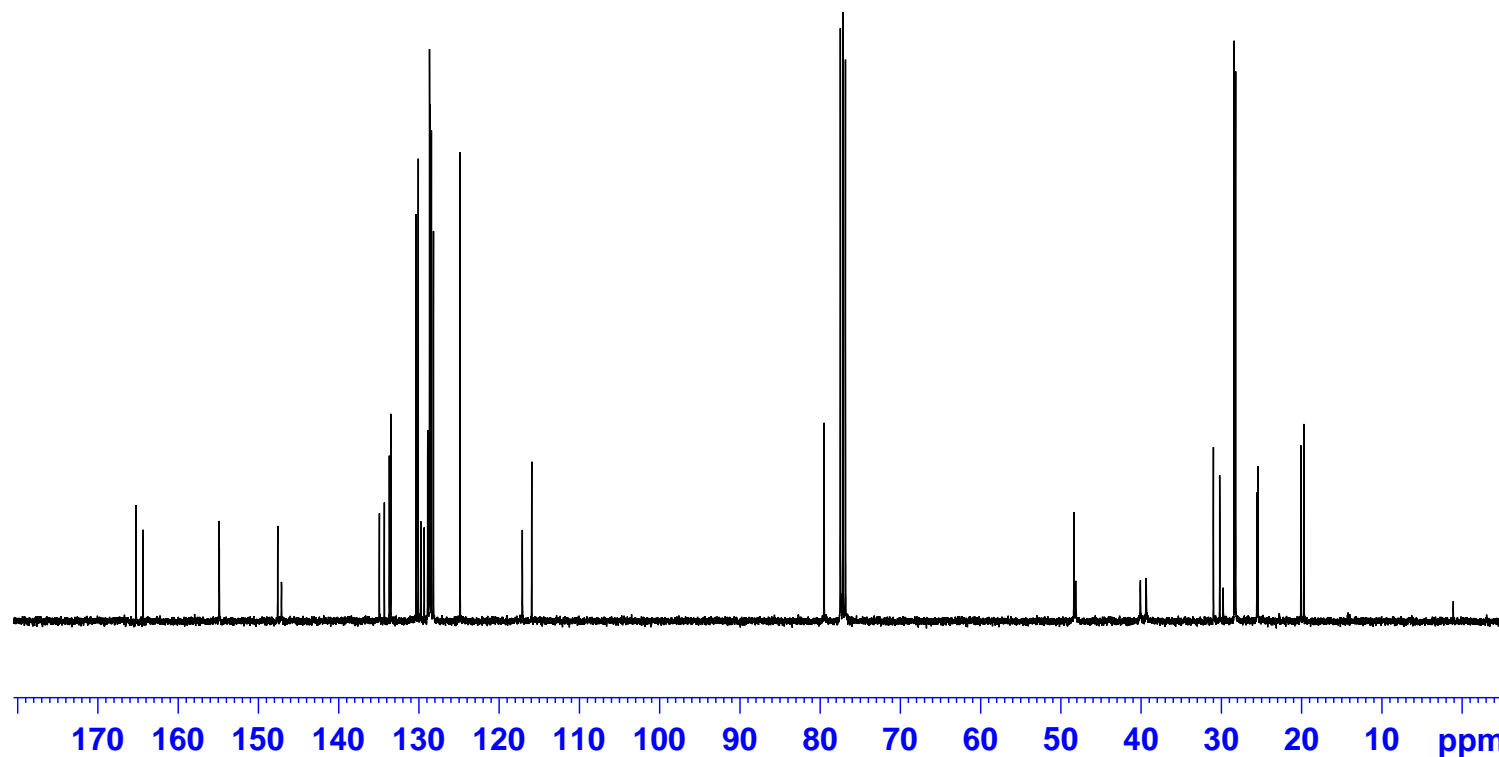

Current Data Parameters  
 NAME 2009-07-06 HJF 3-12805  
 EXPNO 1  
 PROCNO 1

F2 - Acquisition Parameters  
 Date\_ 20090707  
 Time 0.47  
 INSTRUM spect  
 PROBHD 5 mm PABBO BB-  
 PULPROG zgpg30  
 TD 65536  
 SOLVENT CDCl3  
 NS 512  
 DS 0  
 SWH 24038.461 Hz  
 FIDRES 0.366798 Hz  
 AQ 1.3631988 sec  
 RG 2050  
 DW 20.800 usec  
 DE 6.50 usec  
 TE 297.3 K  
 D1 2.00000000 sec  
 d11 0.03000000 sec  
 DELTA 1.89999998 sec  
 TD0 1

==== CHANNEL f1 =====  
 NUC1 13C  
 P1 15.50 usec  
 PL1 -1.00 dB  
 SFO1 100.6228298 MHz

==== CHANNEL f2 =====  
 CPDPRG2 waltz16  
 NUC2 1H  
 PCPD2 60.00 usec  
 PL12 11.35 dB  
 PL13 13.05 dB  
 PL2 -2.00 dB  
 SFO2 400.1316005 MHz

F2 - Processing parameters  
 SI 32768  
 SF 100.6127627 MHz  
 WDW EM  
 SSB 0  
 LB 0.60 Hz  
 GB 0  
 PC 1.40

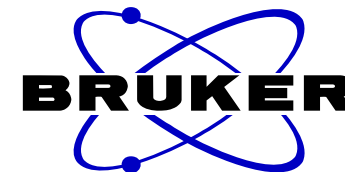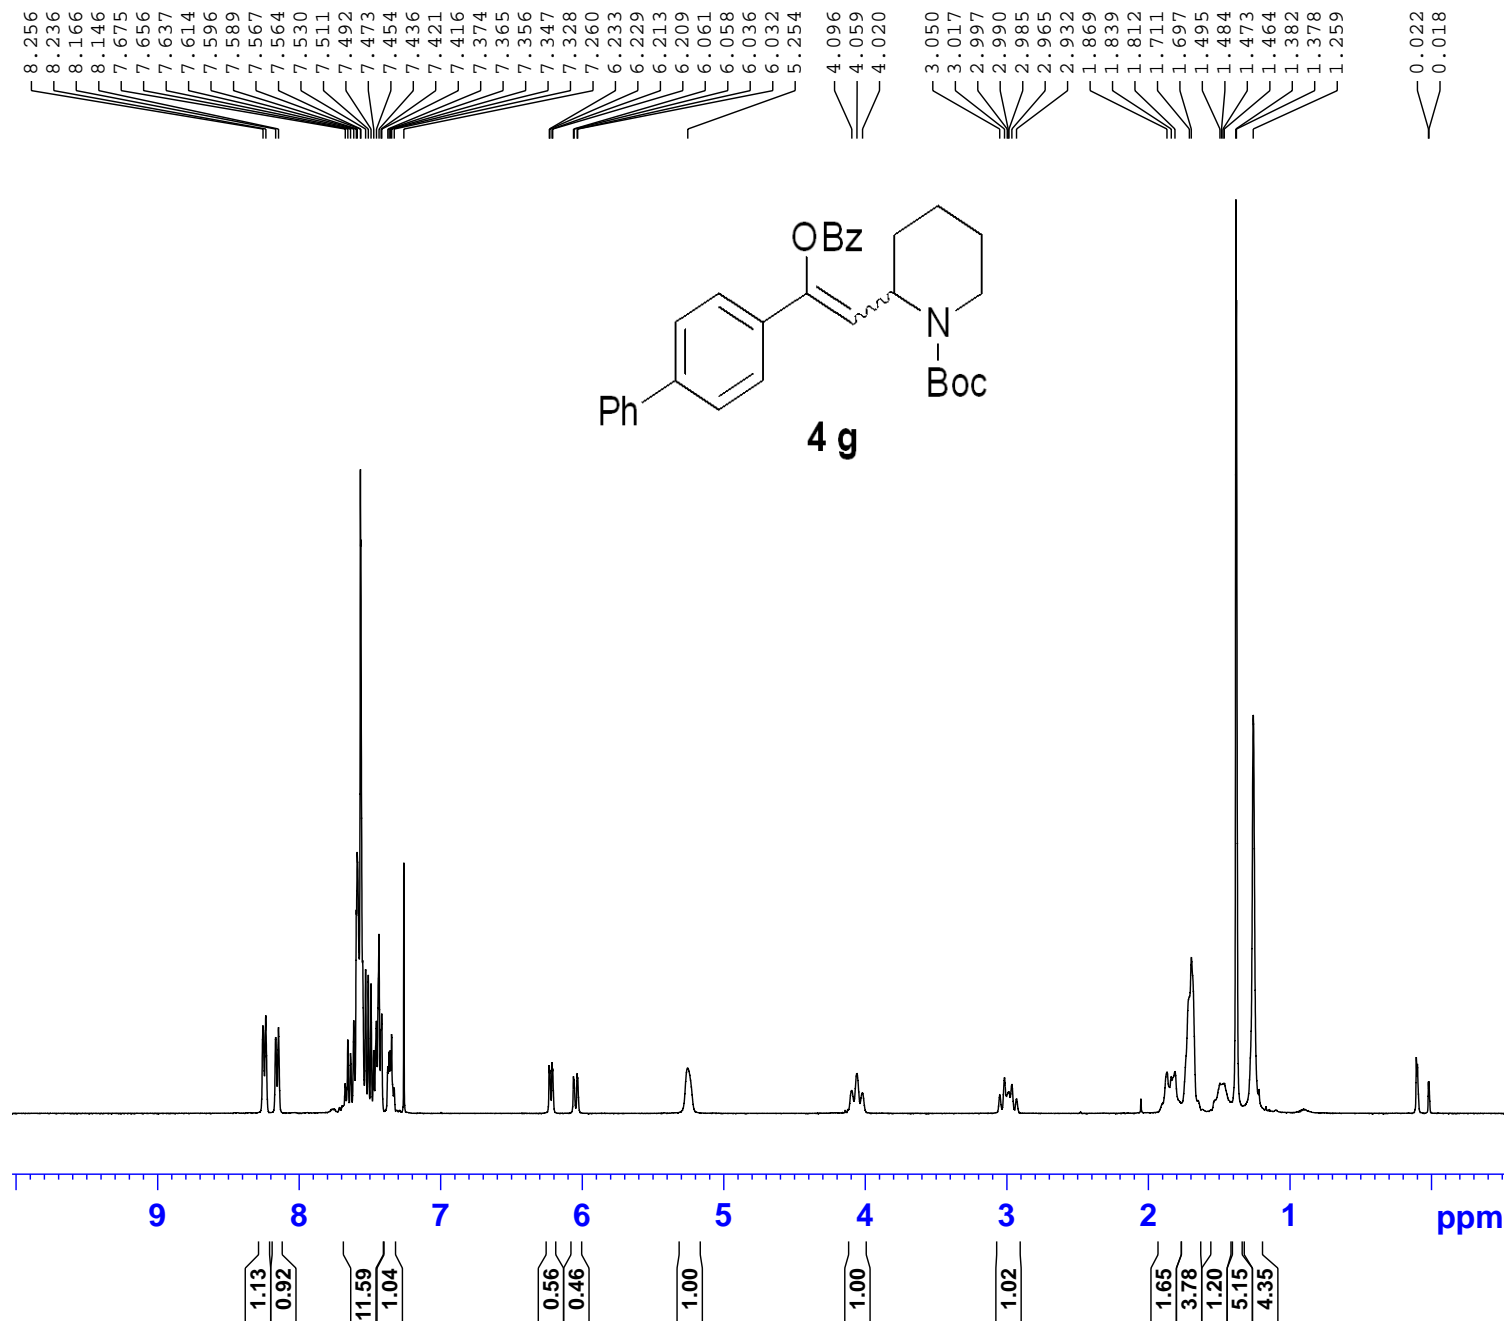

Current Data Parameters  
 NAME Nov17-2009 HJF 4-5004  
 EXPNO 2  
 PROCNO 1

F2 - Acquisition Parameters  
 Date\_ 20091118  
 Time 2.08  
 INSTRUM spect  
 PROBHD 5 mm PABBO BB-  
 PULPROG zg30  
 TD 65536  
 SOLVENT CDCl3  
 NS 16  
 DS 0  
 SWH 8223.685 Hz  
 FIDRES 0.125483 Hz  
 AQ 3.9846387 sec  
 RG 71.8  
 DW 60.800 usec  
 DE 6.50 usec  
 TE 296.1 K  
 D1 1.00000000 sec  
 TD0 1

==== CHANNEL f1 =====  
 NUC1 1H  
 P1 12.00 usec  
 PL1 -2.00 dB  
 SFO1 400.1324710 MHz

F2 - Processing parameters  
 SI 32768  
 SF 400.130093 MHz  
 WDW GM  
 SSB 0  
 LB -0.20 Hz  
 GB 0.1  
 PC 1.00

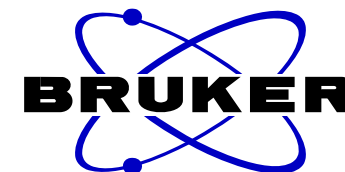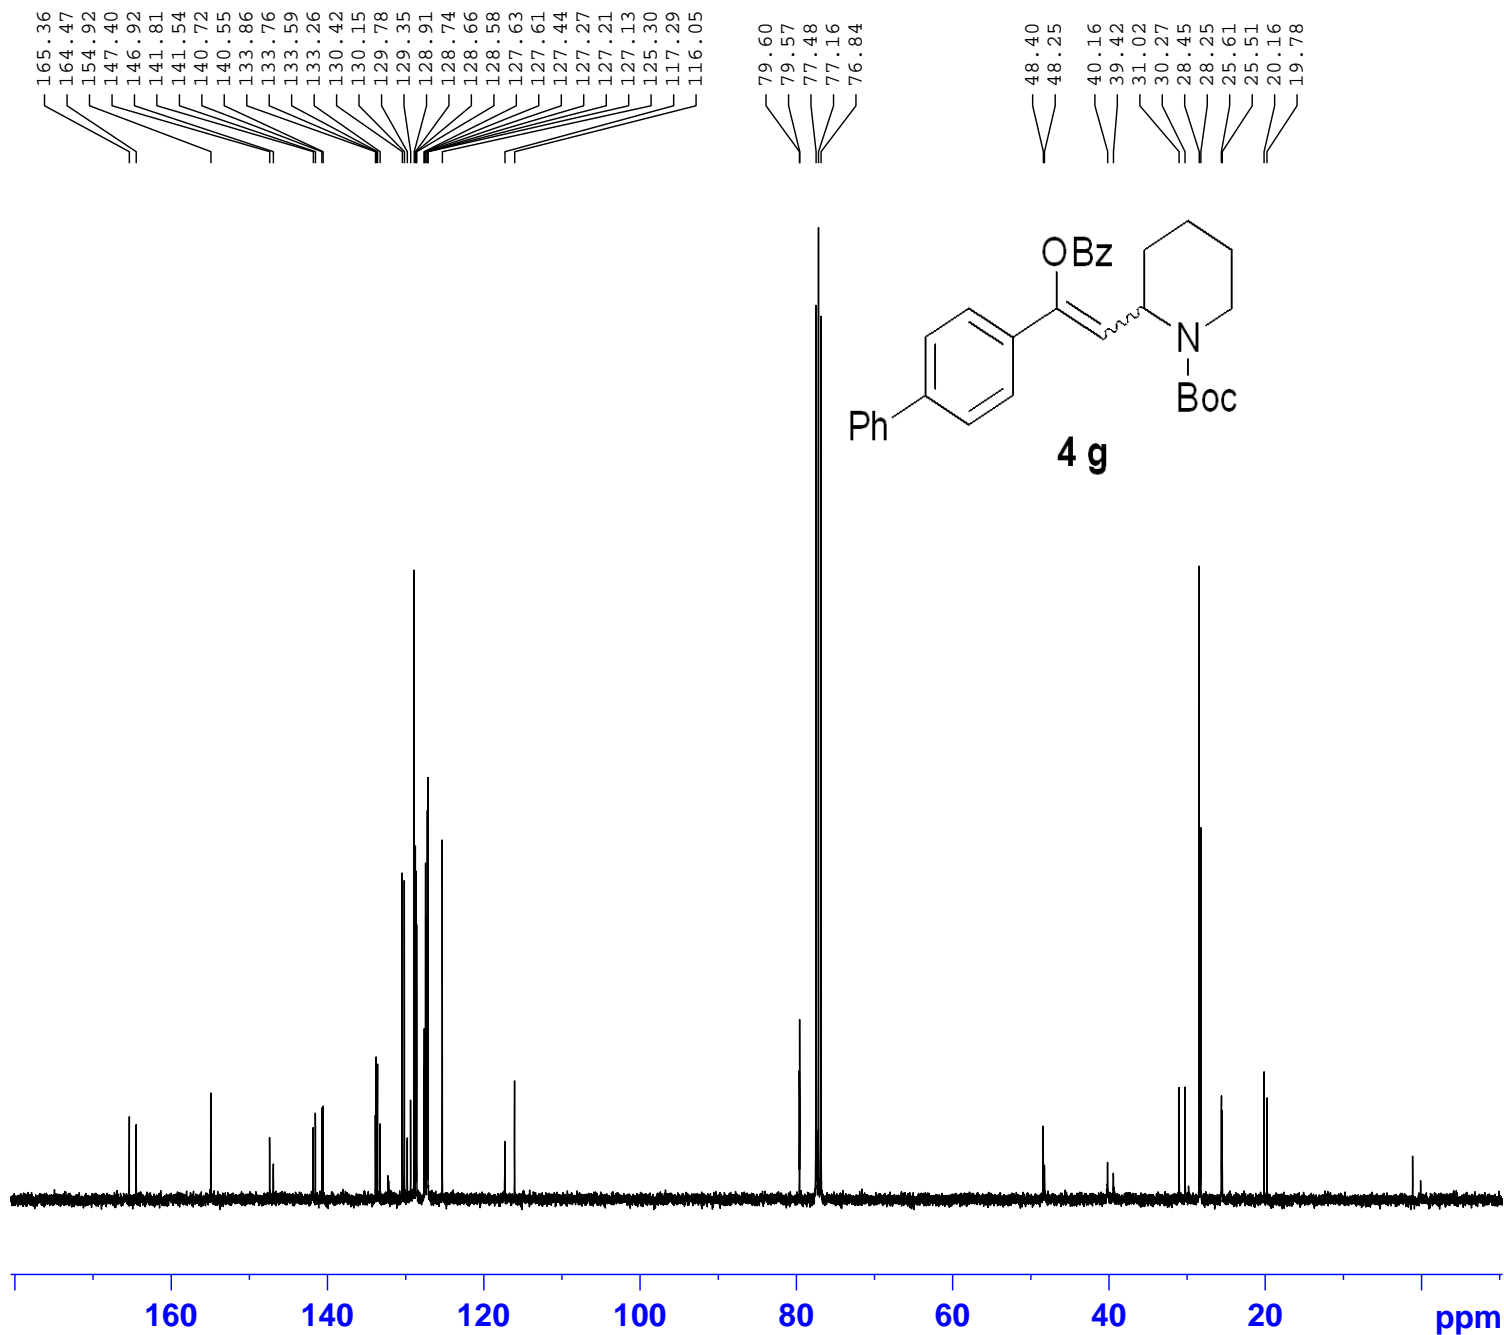

Current Data Parameters  
 NAME 2009-11-30 HJF-4-5004  
 EXPNO 1  
 PROCNO 1

F2 - Acquisition Parameters  
 Date\_ 20091130  
 Time 19.13  
 INSTRUM spect  
 PROBHD 5 mm PABBO BB-  
 PULPROG zgpg30  
 TD 65536  
 SOLVENT CDC13  
 NS 512  
 DS 0  
 SWH 24038.461 Hz  
 FIDRES 0.366798 Hz  
 AQ 1.3631988 sec  
 RG 181  
 DW 20.800 usec  
 DE 6.50 usec  
 TE 297.6 K  
 D1 2.00000000 sec  
 d11 0.03000000 sec  
 DELTA 1.89999998 sec  
 TD0 1

==== CHANNEL f1 =====  
 NUC1 13C  
 P1 15.50 usec  
 PL1 -1.00 dB  
 SFO1 100.6228298 MHz

==== CHANNEL f2 =====  
 CPDPRG2 waltz16  
 NUC2 1H  
 PCPD2 60.00 usec  
 PL12 11.35 dB  
 PL13 13.05 dB  
 PL2 -2.00 dB  
 SFO2 400.1316005 MHz

F2 - Processing parameters  
 SI 32768  
 SF 100.6127597 MHz  
 WDW EM  
 SSB 0  
 LB 0.60 Hz  
 GB 0  
 PC 1.40

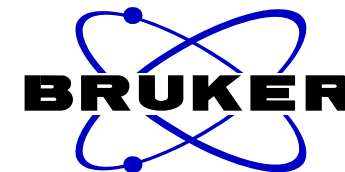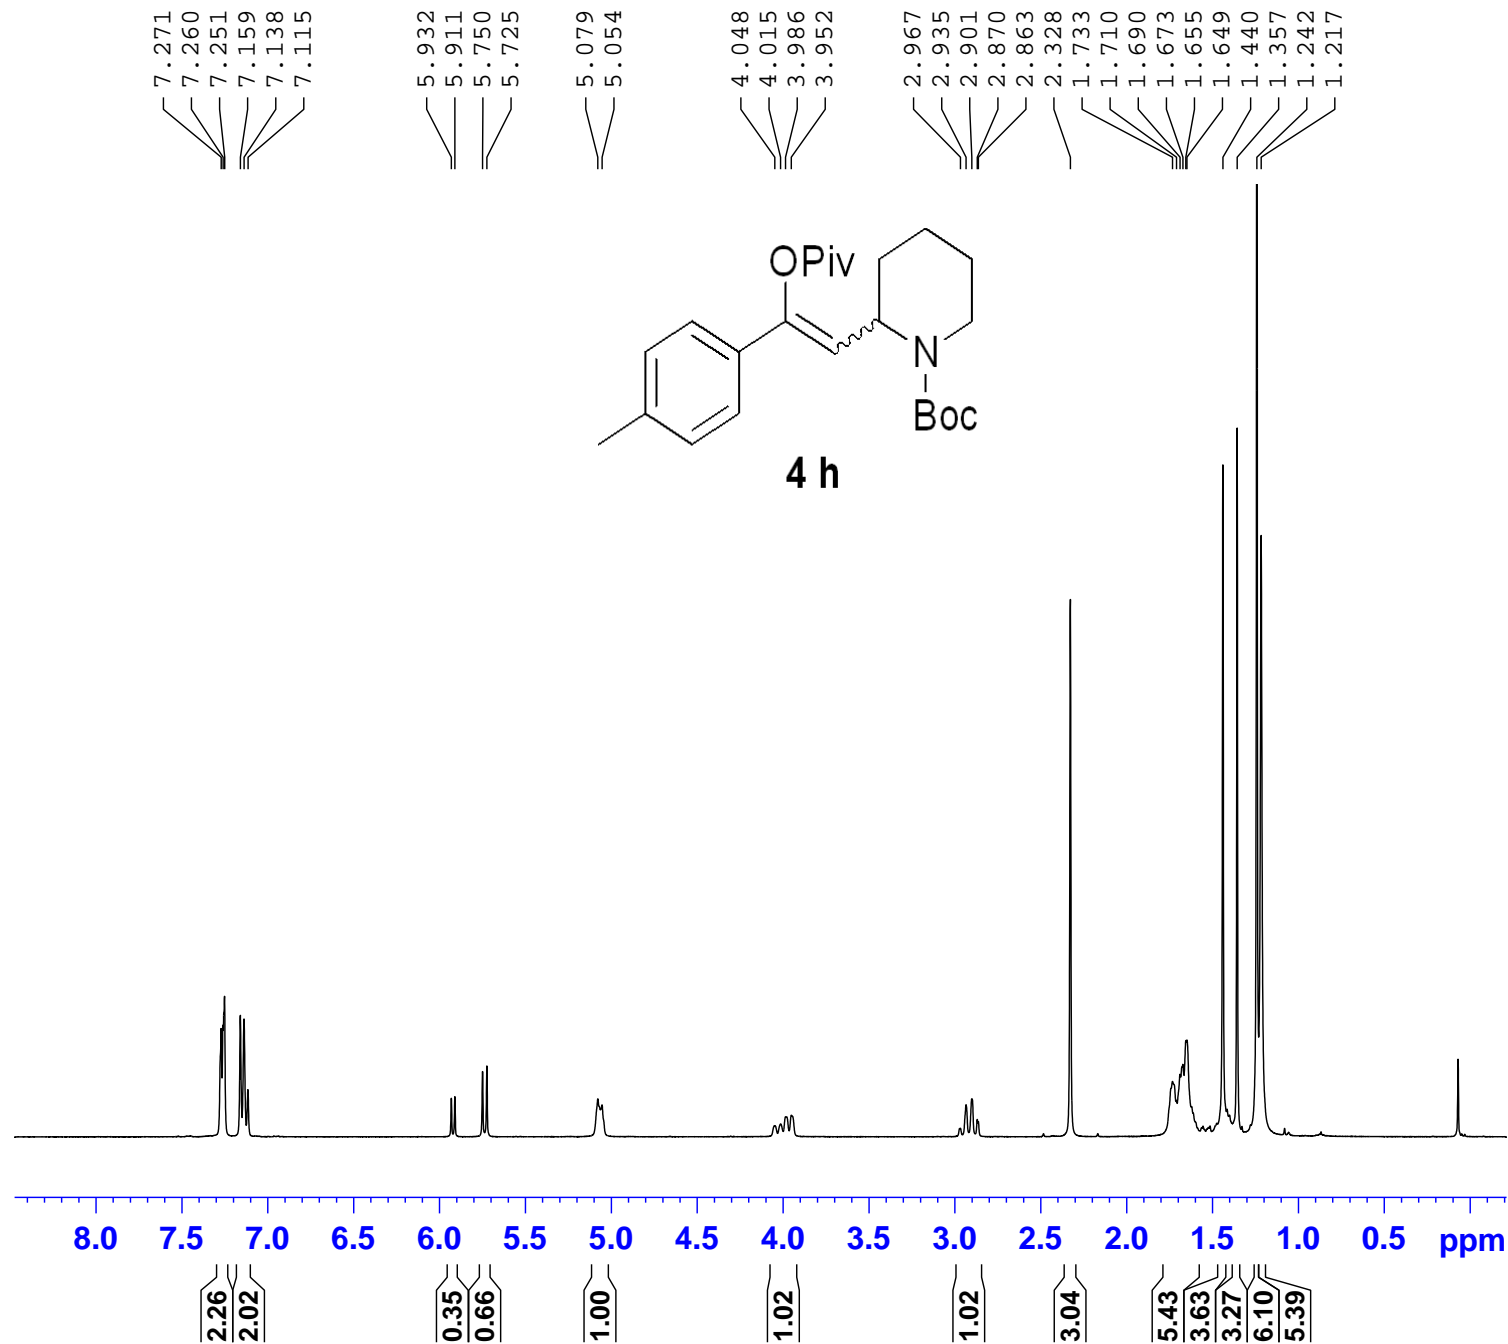

Current Data Parameters  
NAME Jul23-2009 HJF 3-14405  
EXPNO 2  
PROCNO 1

F2 - Acquisition Parameters  
Date\_ 20090724  
Time 1.29  
INSTRUM spect  
PROBHD 5 mm PABBO BB-  
PULPROG zg30  
TD 65536  
SOLVENT CDC13  
NS 16  
DS 0  
SWH 8223.685 Hz  
FIDRES 0.125483 Hz  
AQ 3.9846387 sec  
RG 90.5  
DW 60.800 usec  
DE 6.50 usec  
TE 295.6 K  
D1 1.00000000 sec  
TD0 1

===== CHANNEL f1 =====  
NUC1 1H  
P1 12.00 usec  
PL1 -2.00 dB  
SFO1 400.1324710 MHz

F2 - Processing parameters  
SI 32768  
SF 400.1300089 MHz  
WDW GM  
SSB 0  
LB -0.20 Hz  
GB 0.1  
PC 1.00

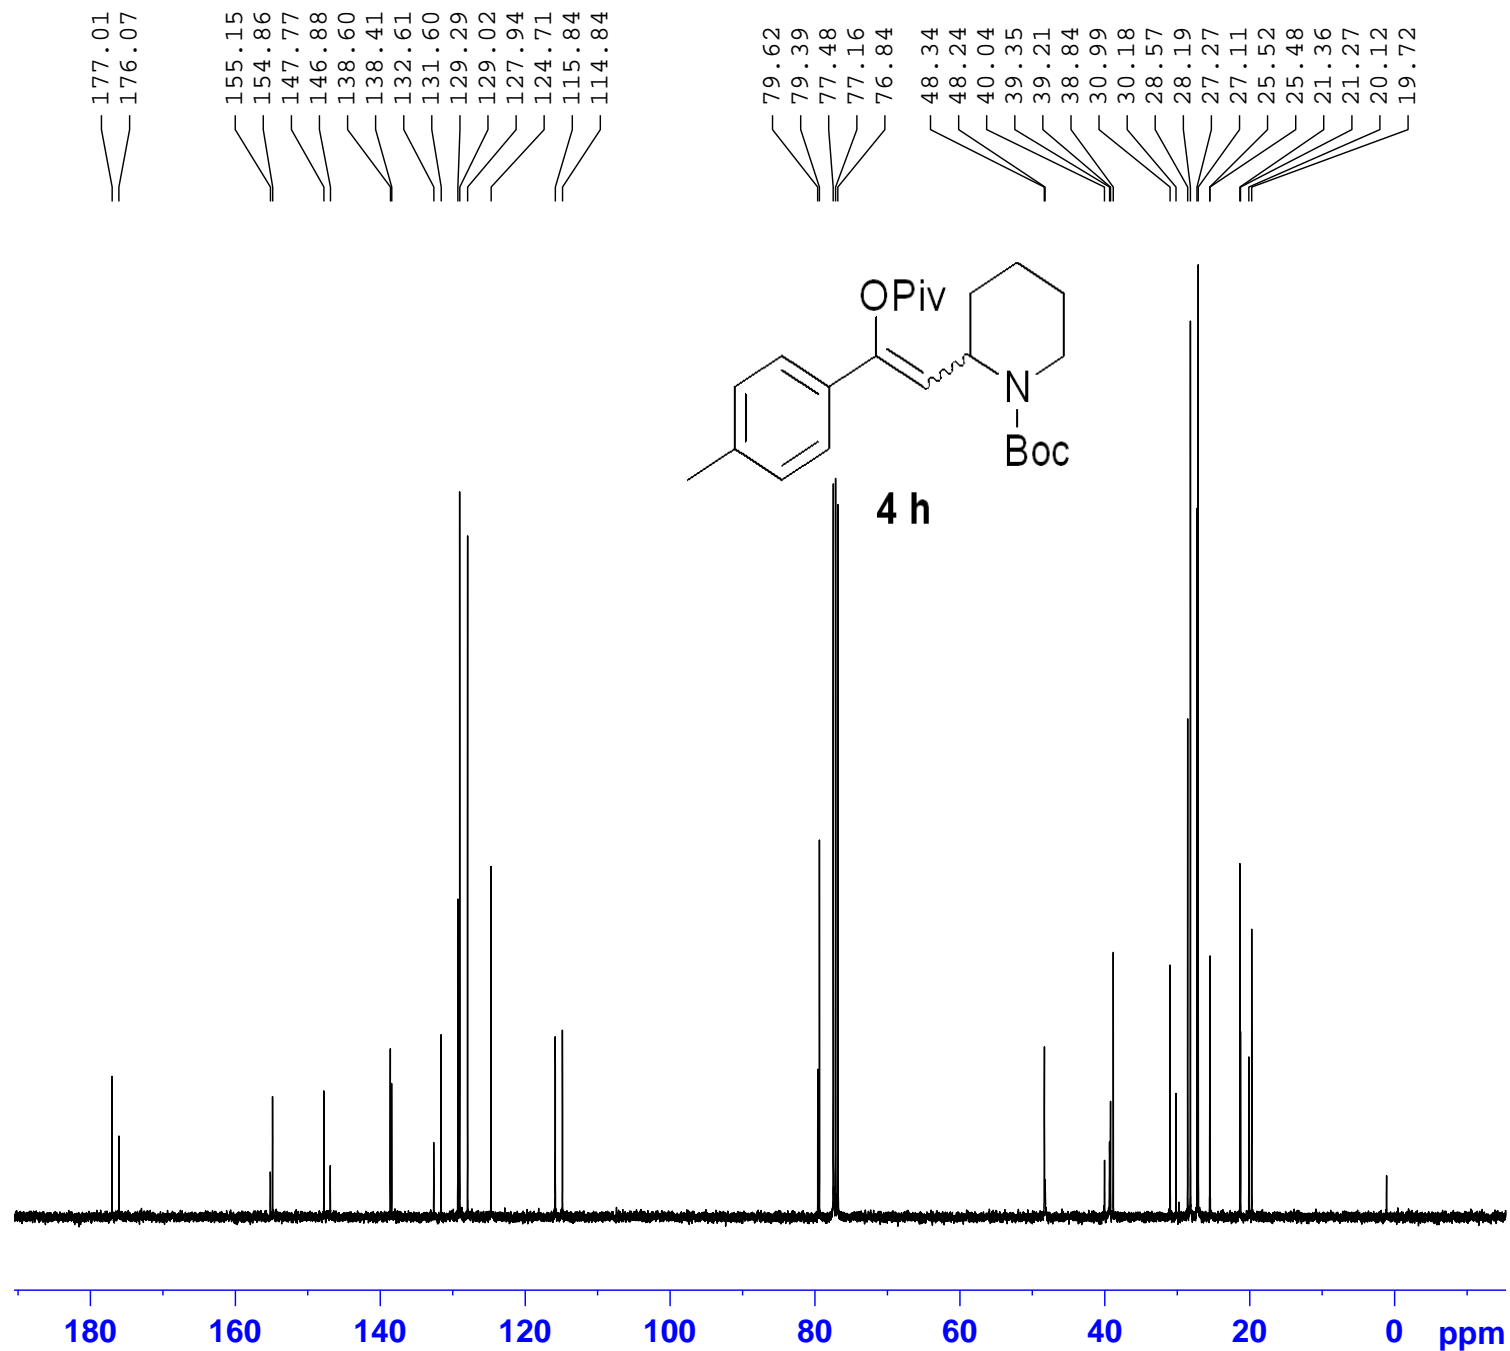

Current Data Parameters  
NAME 2009-07-27 HJF 3-14405  
EXPNO 2  
PROCNO 1

F2 - Acquisition Parameters  
Date\_ 20090727  
Time 17.19  
INSTRUM spect  
PROBHD 5 mm PABBO BB-  
PULPROG zgpg30  
TD 65536  
SOLVENT CDCl3  
NS 512  
DS 0  
SWH 24038.461 Hz  
FIDRES 0.366798 Hz  
AQ 1.3631988 sec  
RG 90.5  
DW 20.800 usec  
DE 6.50 usec  
TE 297.1 K  
D1 2.0000000 sec  
d11 0.0300000 sec  
DELTA 1.89999998 sec  
TD0 1

=====  
CHANNEL f1  
NUC1 13C  
P1 15.50 usec  
PL1 -1.00 dB  
SFO1 100.6228298 MHz

=====  
CHANNEL f2  
CPDPRG2 waltz16  
NUC2 1H  
PCPD2 60.00 usec  
PL12 11.35 dB  
PL13 13.05 dB  
PL2 -2.00 dB  
SFO2 400.1316005 MHz

F2 - Processing parameters  
SI 32768  
SF 100.6127605 MHz  
WDW EM  
SSB 0  
LB 0.60 Hz  
GB 0  
PC 1.40



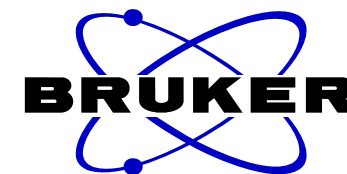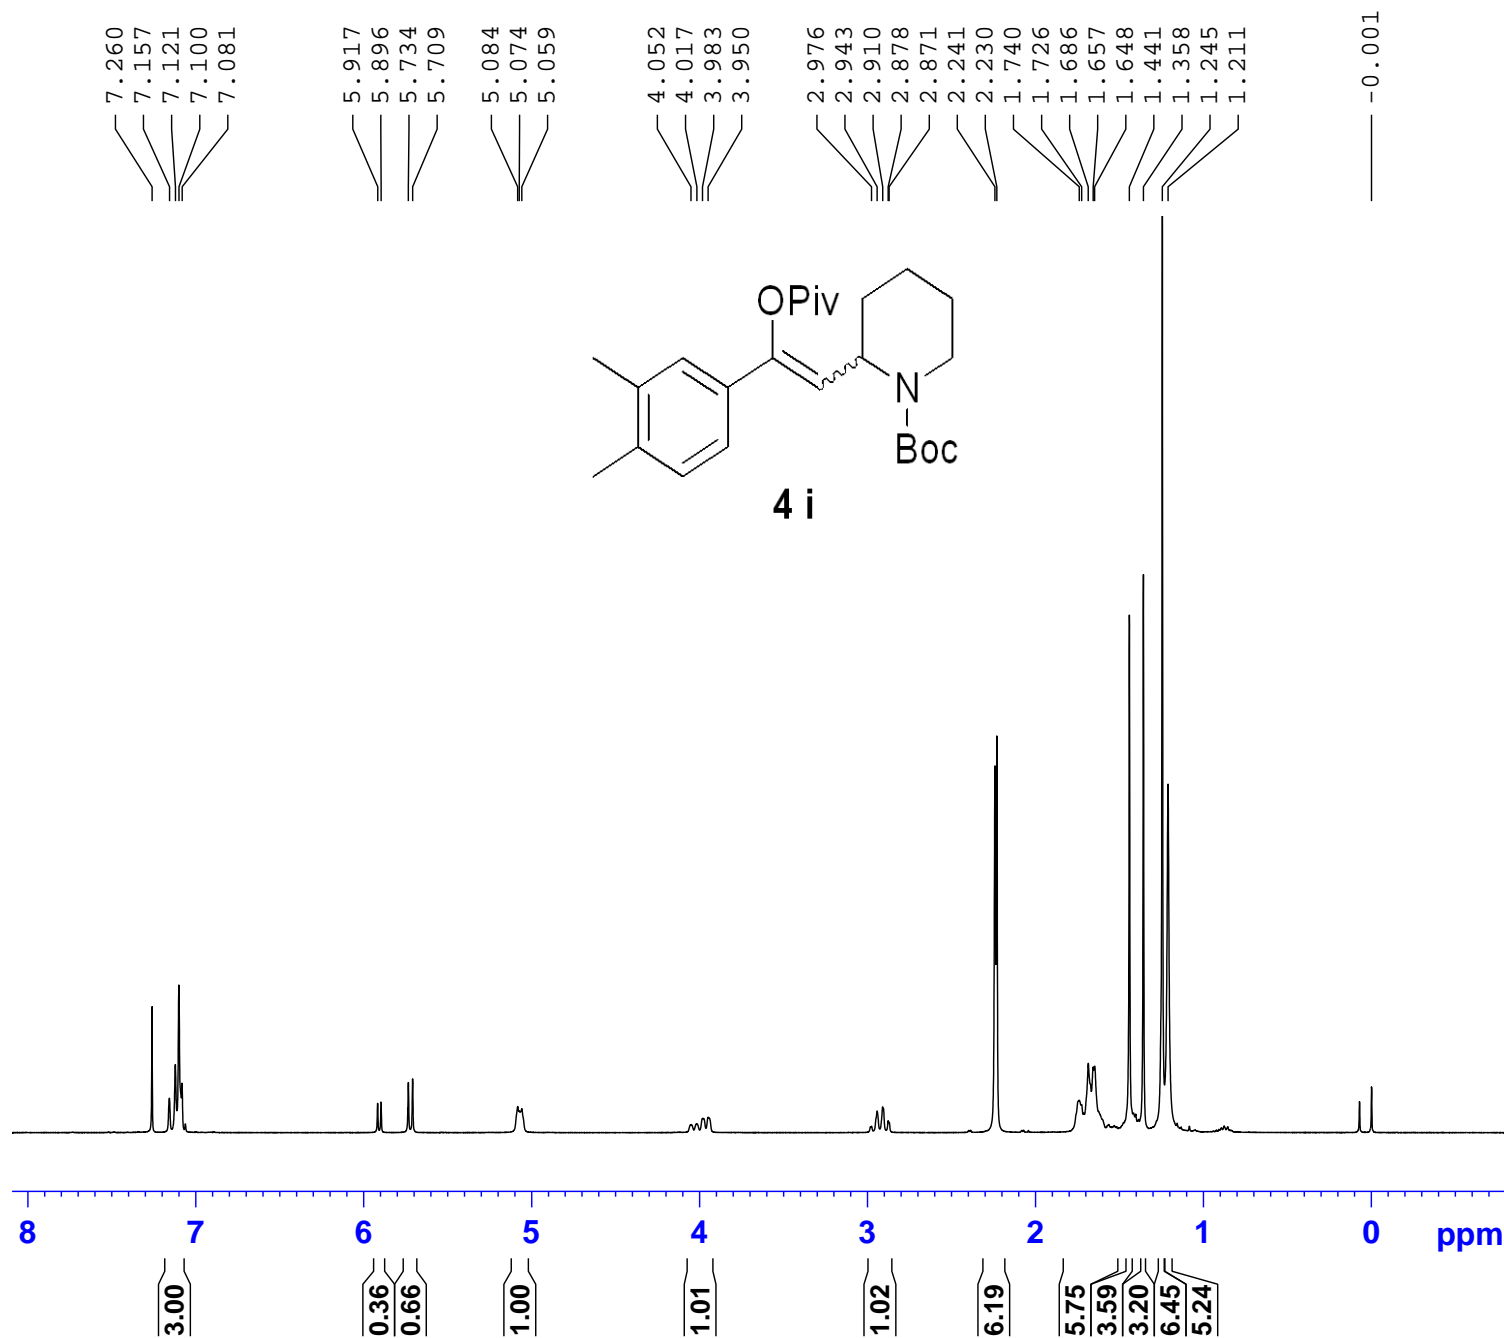

Current Data Parameters  
 NAME Dec08-2009 HJF 4-5301  
 EXPNO 8  
 PROCNO 1

F2 - Acquisition Parameters  
 Date\_ 20091209  
 Time 1.56  
 INSTRUM spect  
 PROBHD 5 mm PABBO BB-  
 PULPROG zg30  
 TD 65536  
 SOLVENT CDCl3  
 NS 8  
 DS 0  
 SWH 8223.685 Hz  
 FIDRES 0.125483 Hz  
 AQ 3.9846387 sec  
 RG 90.5  
 DW 60.800 usec  
 DE 6.50 usec  
 TE 296.1 K  
 D1 1.00000000 sec  
 TD0 1

==== CHANNEL f1 =====  
 NUC1 1H  
 P1 12.00 usec  
 PL1 -2.00 dB  
 SFO1 400.1324710 MHz

F2 - Processing parameters  
 SI 32768  
 SF 400.130094 MHz  
 WDW GM  
 SSB 0  
 LB -0.20 Hz  
 GB 0.1  
 PC 1.00

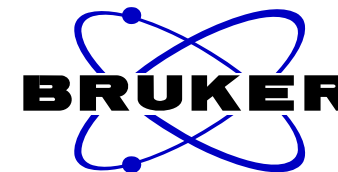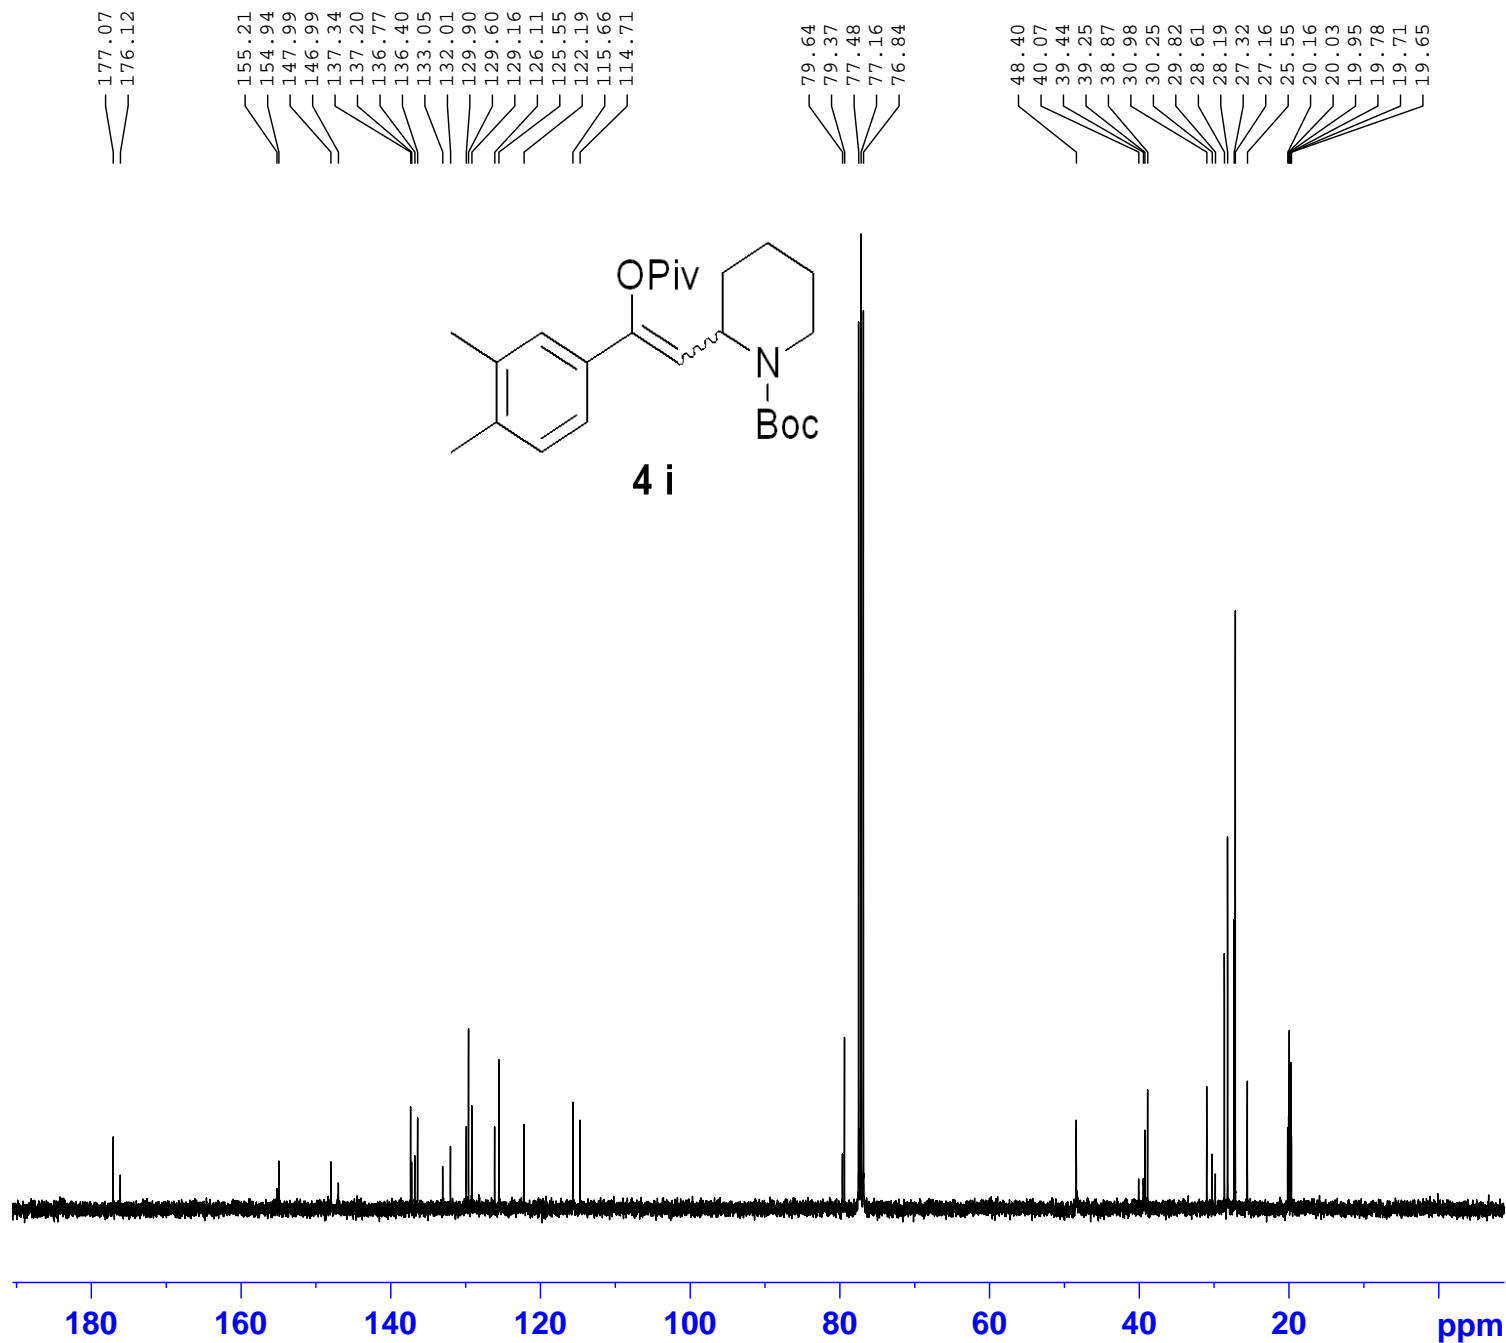

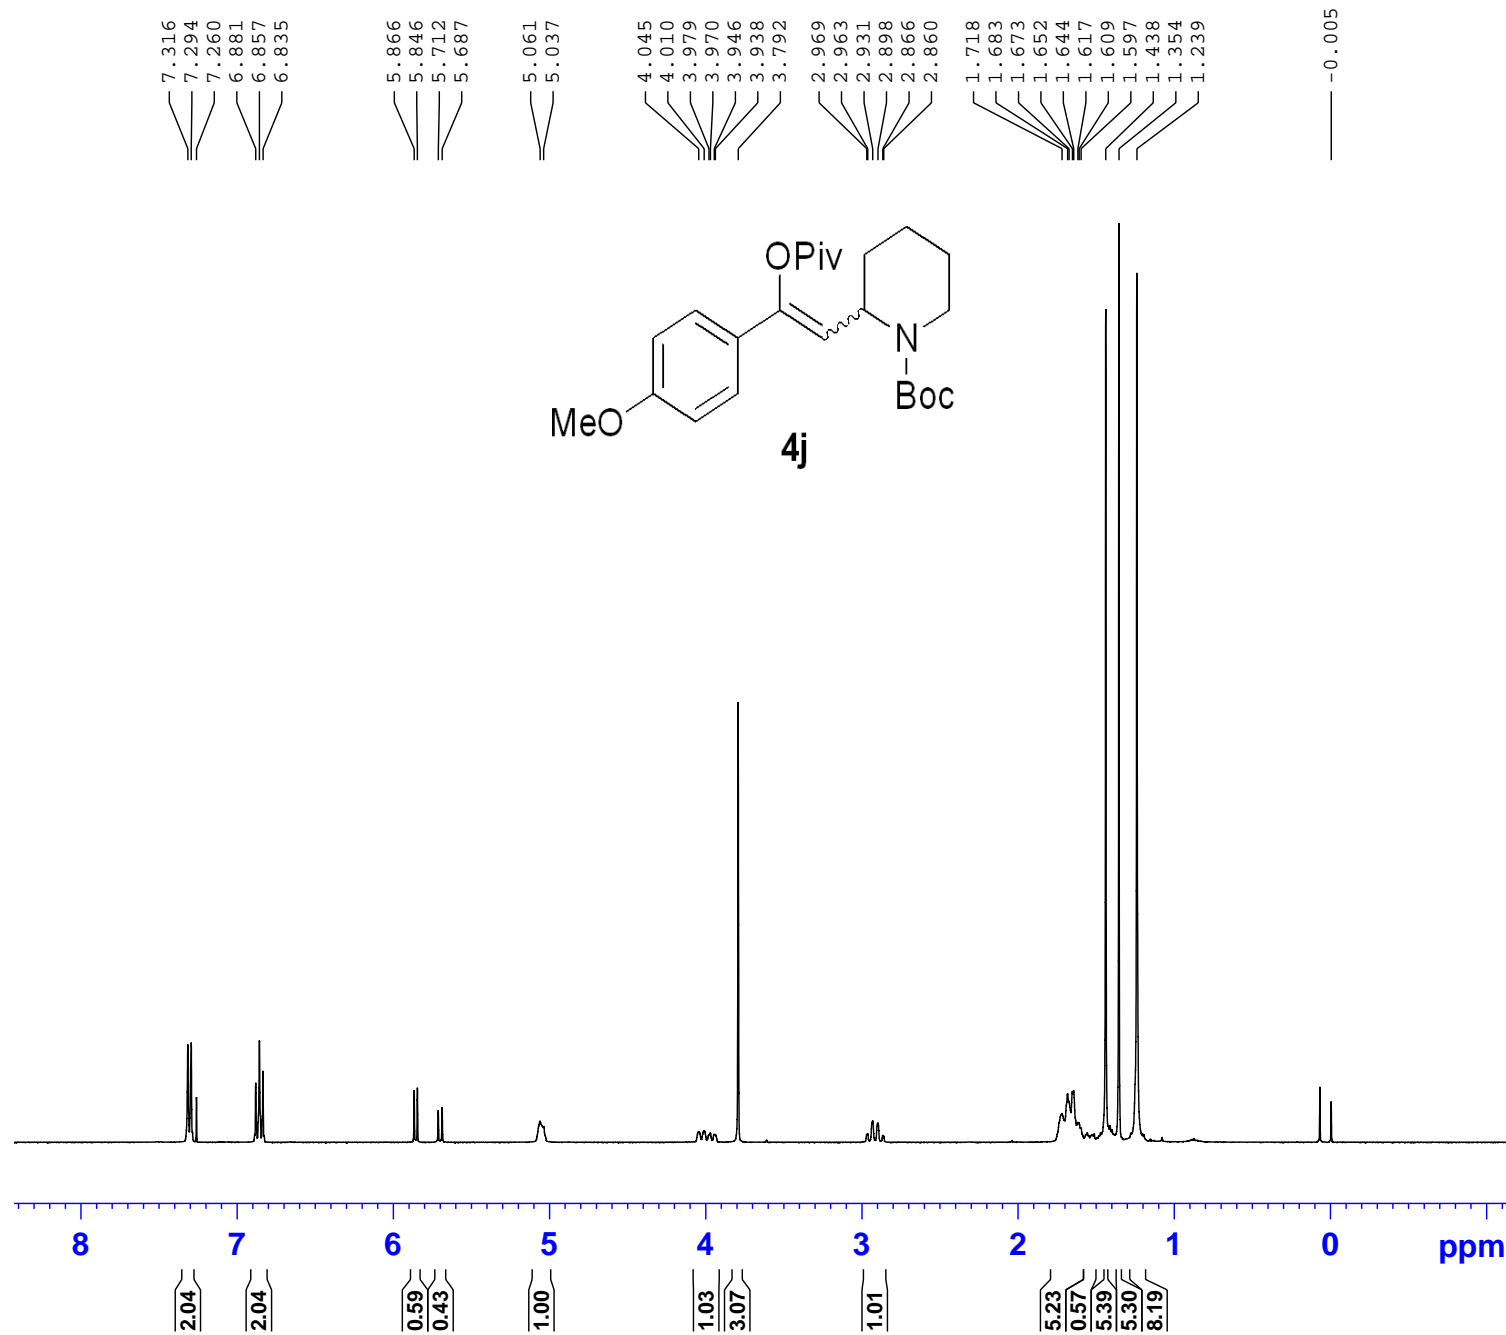

7.316  
7.294  
7.260  
6.881  
6.857  
6.835

5.866  
5.846  
5.712  
5.687

5.061  
5.037

4.045  
4.010  
3.979  
3.970  
3.946  
3.938  
3.792

2.969  
2.963  
2.931  
2.898  
2.866  
2.860

1.718  
1.683  
1.673  
1.652  
1.644  
1.617  
1.609  
1.597  
1.438  
1.354  
1.239

— -0.005

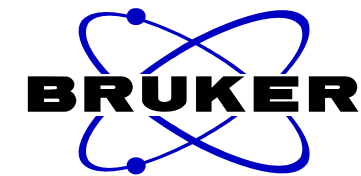

Current Data Parameters  
 NAME Oct29-2009 HJF 4-3802  
 EXPNO 4  
 PROCNO 1

F2 - Acquisition Parameters  
 Date\_ 20091030  
 Time 2.18  
 INSTRUM spect  
 PROBHD 5 mm PABBO BB-  
 PULPROG zg30  
 TD 65536  
 SOLVENT CDCl3  
 NS 8  
 DS 0  
 SWH 8223.685 Hz  
 FIDRES 0.125483 Hz  
 AQ 3.9846387 sec  
 RG 90.5  
 DW 60.800 usec  
 DE 6.50 usec  
 TE 296.0 K  
 D1 1.00000000 sec  
 TD0 1

==== CHANNEL f1 =====  
 NUC1 1H  
 P1 12.00 usec  
 PL1 -2.00 dB  
 SFO1 400.1324710 MHz

F2 - Processing parameters  
 SI 32768  
 SF 400.1300093 MHz  
 WDW GM  
 SSB 0  
 LB -0.20 Hz  
 GB 0.1  
 PC 1.00

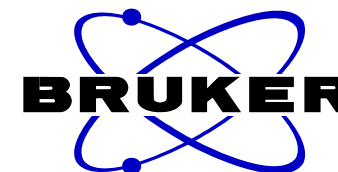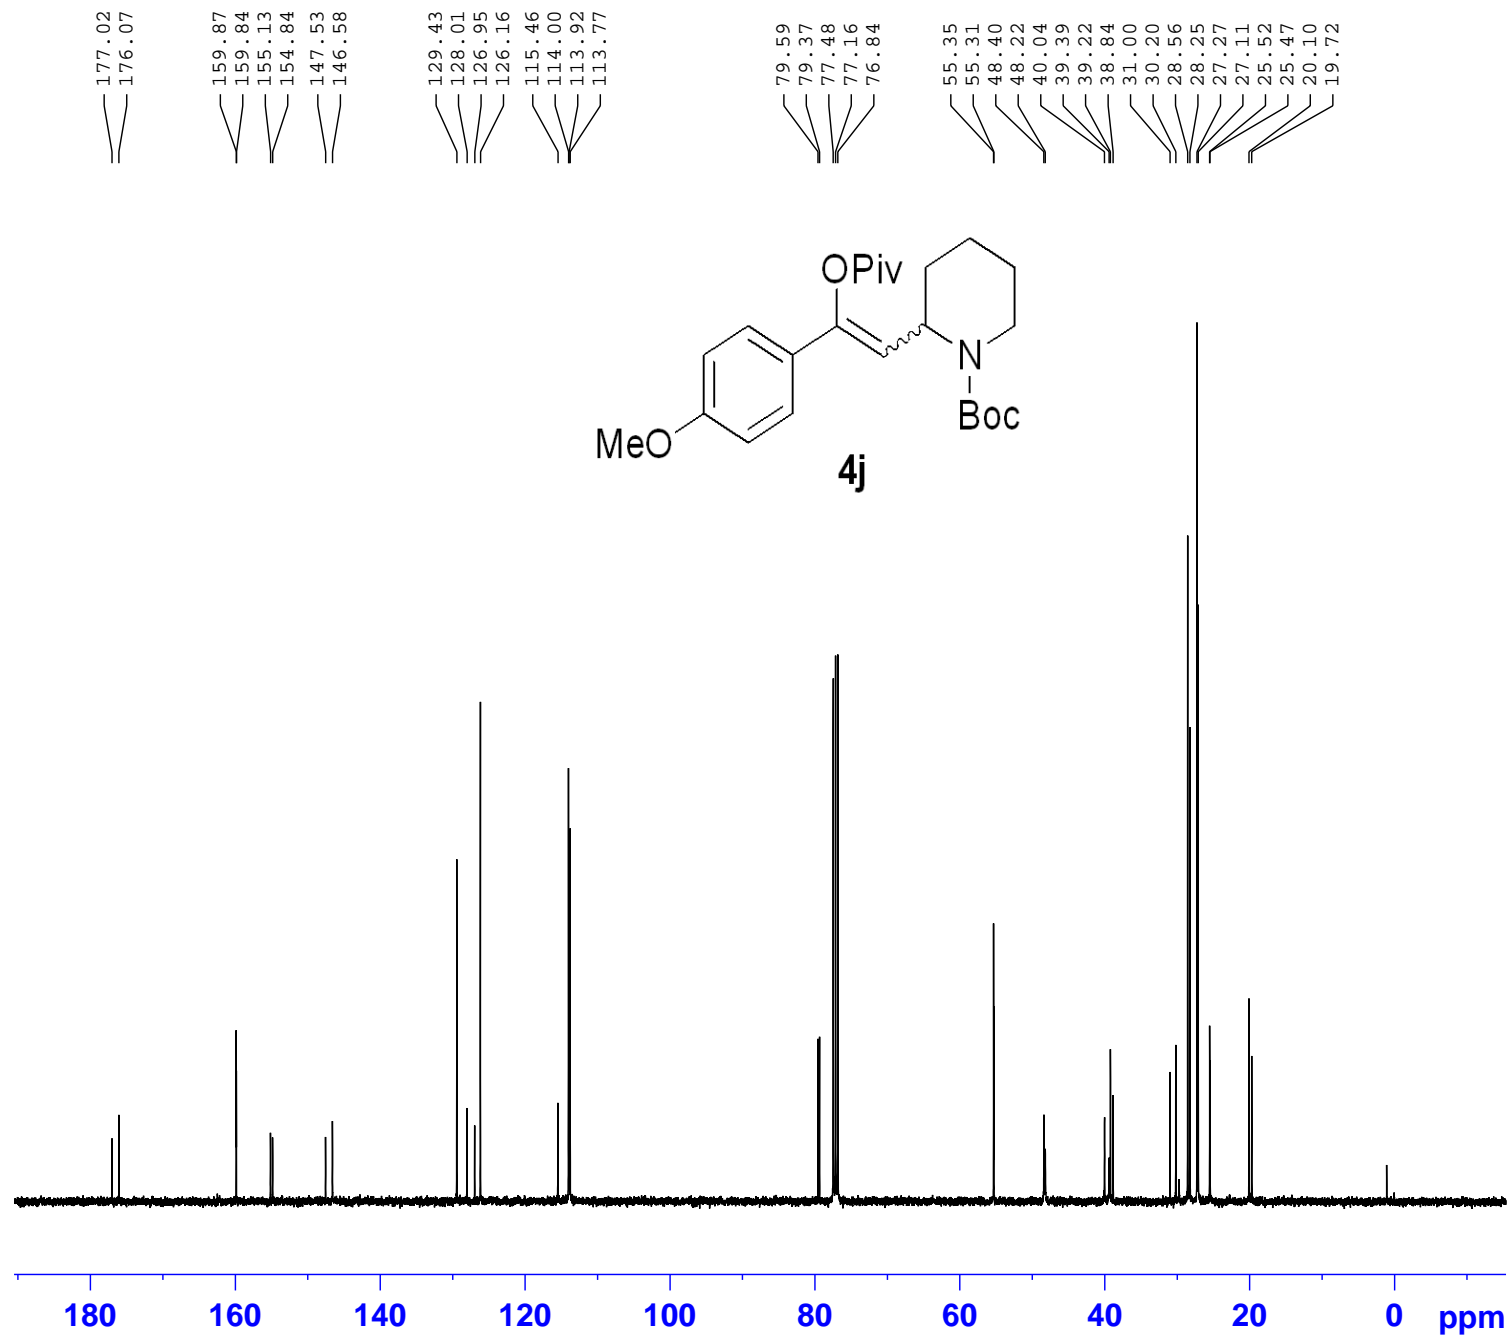

Current Data Parameters  
NAME 2009-11-24 HJF-4-3802  
EXPNO 2  
PROCNO 1

F2 - Acquisition Parameters  
Date\_ 20091124  
Time 19.30  
INSTRUM spect  
PROBHD 5 mm PABBO BB-  
PULPROG zgpg30  
TD 65536  
SOLVENT CDCl3  
NS 512  
DS 0  
SWH 24038.461 Hz  
FIDRES 0.366798 Hz  
AQ 1.3631988 sec  
RG 181  
DW 20.800 usec  
DE 6.50 usec  
TE 298.4 K  
D1 2.0000000 sec  
d11 0.0300000 sec  
DELTA 1.89999998 sec  
TD0 1

==== CHANNEL f1 =====  
NUC1 13C  
P1 15.50 usec  
PL1 -1.00 dB  
SFO1 100.6228298 MHz

==== CHANNEL f2 =====  
CPDPRG2 waltz16  
NUC2 1H  
PCPD2 60.00 usec  
PL12 11.35 dB  
PL13 13.05 dB  
PL2 -2.00 dB  
SFO2 400.1316005 MHz

F2 - Processing parameters  
SI 32768  
SF 100.6127610 MHz  
WDW EM  
SSB 0  
LB 0.60 Hz  
GB 0  
PC 1.40

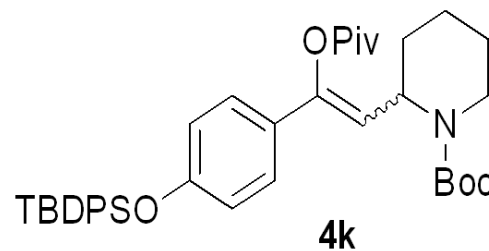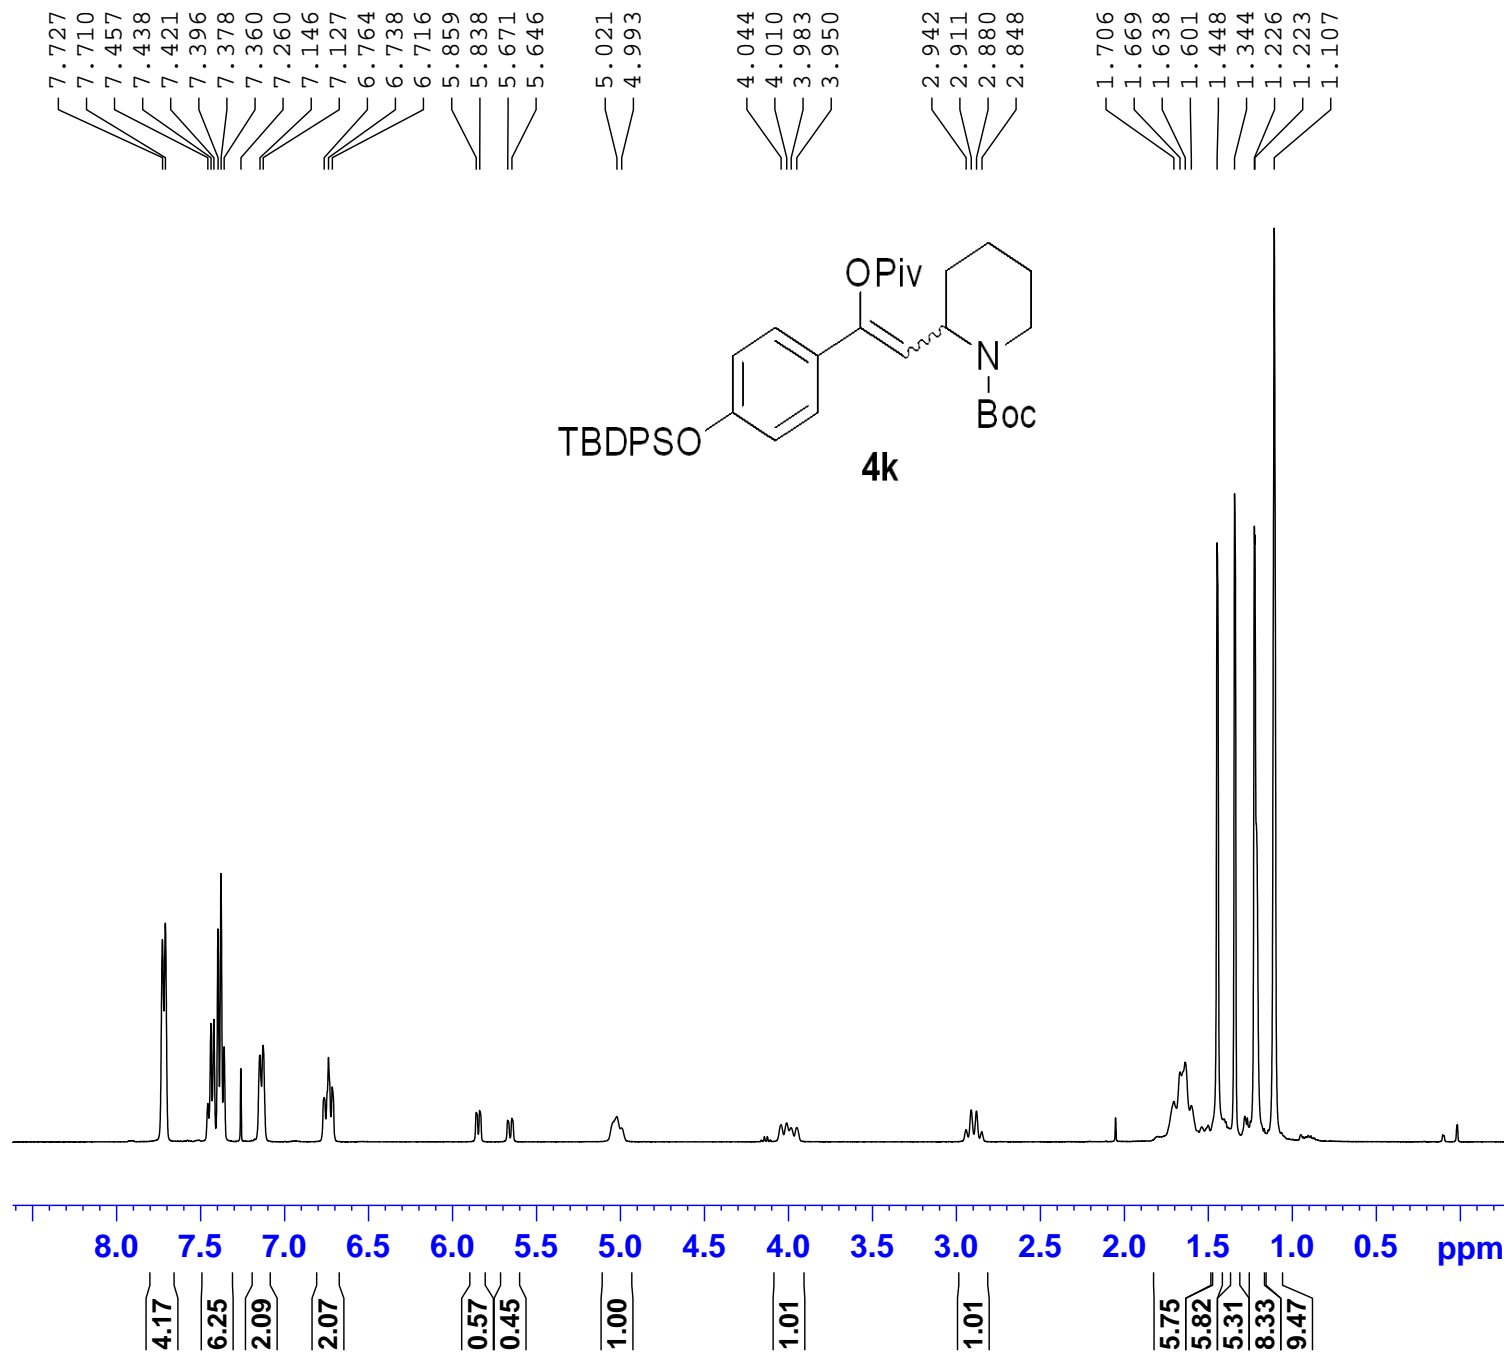

Current Data Parameters  
 NAME Dec21-2009 HJF 4-5902  
 EXPNO 9  
 PROCNO 1

F2 - Acquisition Parameters  
 Date\_ 20091222  
 Time 2.09  
 INSTRUM spect  
 PROBHD 5 mm PABBO BB-  
 PULPROG zg30  
 TD 65536  
 SOLVENT CDCl3  
 NS 8  
 DS 0  
 SWH 8223.685 Hz  
 FIDRES 0.125483 Hz  
 AQ 3.9846387 sec  
 RG 45.2  
 DW 60.800 usec  
 DE 6.50 usec  
 TE 295.7 K  
 D1 1.00000000 sec  
 TD0 1

==== CHANNEL f1 =====  
 NUC1 1H  
 P1 12.00 usec  
 PL1 -2.00 dB  
 SFO1 400.1324710 MHz

F2 - Processing parameters  
 SI 32768  
 SF 400.1300093 MHz  
 WDW GM  
 SSB 0  
 LB -0.20 Hz  
 GB 0.1  
 PC 1.00

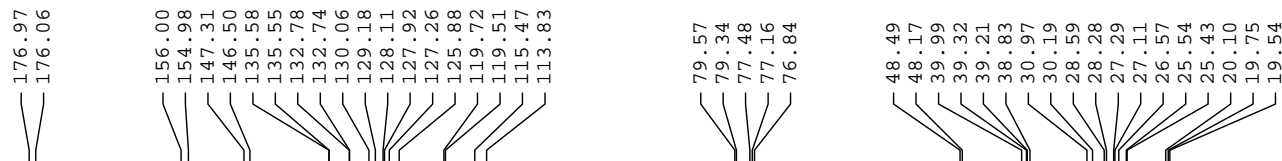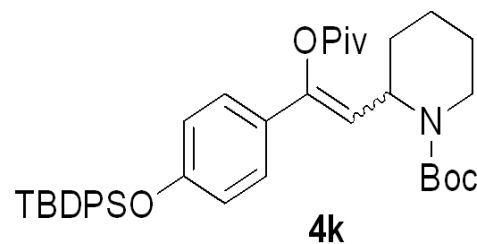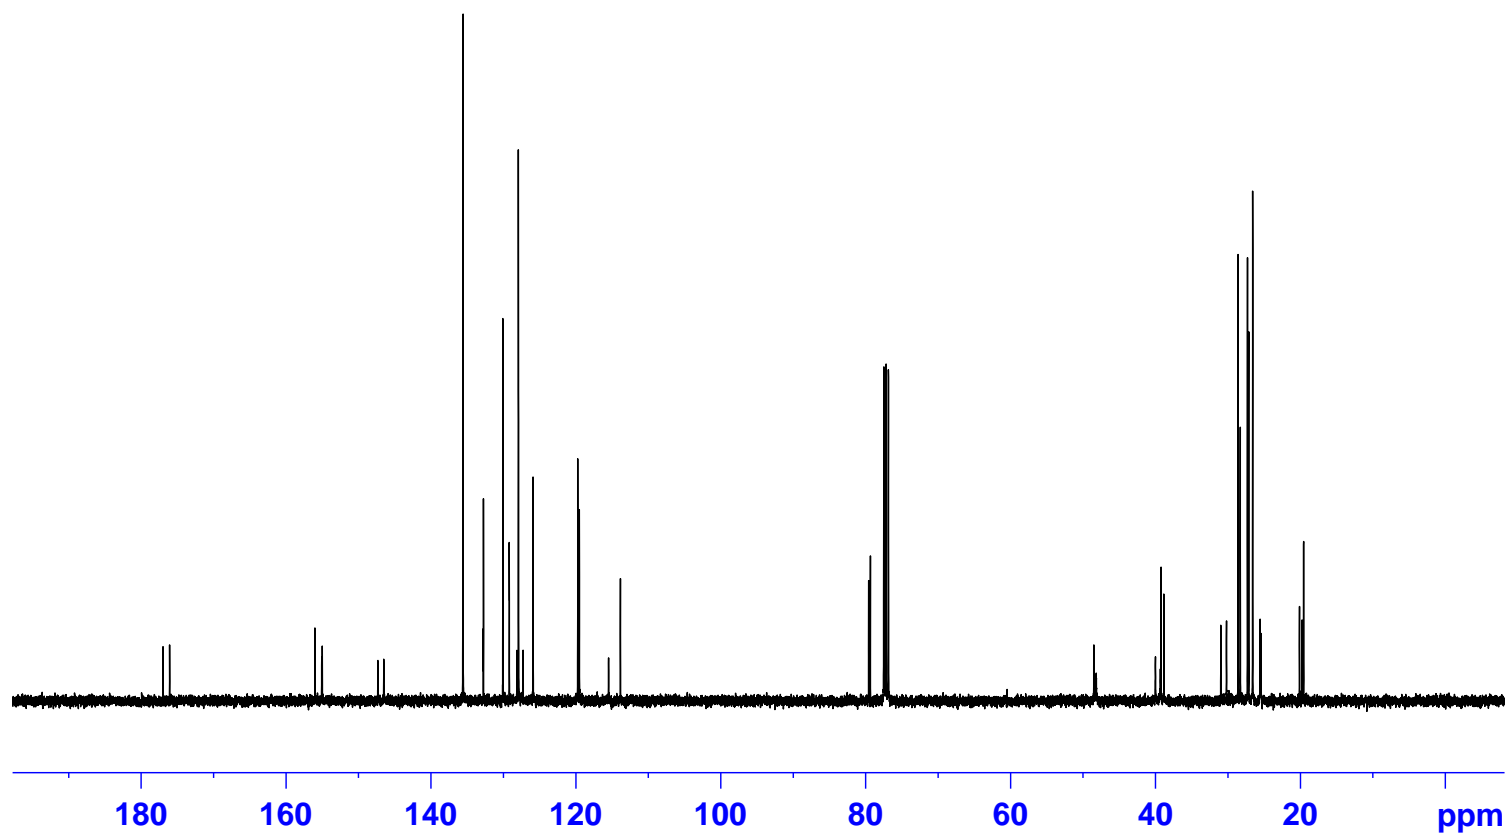

Current Data Parameters  
NAME Dec21-2009 HJF 4-5902  
EXPNO 10  
PROCNO 1

F2 - Acquisition Parameters  
Date\_ 20091222  
Time 2.26  
INSTRUM spect  
PROBHD 5 mm PABBO BB-  
PULPROG zgpg30  
TD 65536  
SOLVENT CDC13  
NS 256  
DS 0  
SWH 24038.461 Hz  
FIDRES 0.366798 Hz  
AQ 1.3631988 sec  
RG 1820  
DW 20.800 usec  
DE 6.50 usec  
TE 297.1 K  
D1 2.00000000 sec  
d11 0.03000000 sec  
DELTA 1.89999998 sec  
TD0 1

==== CHANNEL f1 =====  
NUC1 13C  
P1 15.50 usec  
PL1 -1.00 dB  
SFO1 100.6228298 MHz

==== CHANNEL f2 =====  
CPDPRG2 waltz16  
NUC2 1H  
PCPD2 60.00 usec  
PL12 11.35 dB  
PL13 13.05 dB  
PL2 -2.00 dB  
SFO2 400.1316005 MHz

F2 - Processing parameters  
SI 32768  
SF 100.6127615 MHz  
WDW EM  
SSB 0  
LB 0.60 Hz  
GB 0  
PC 1.40

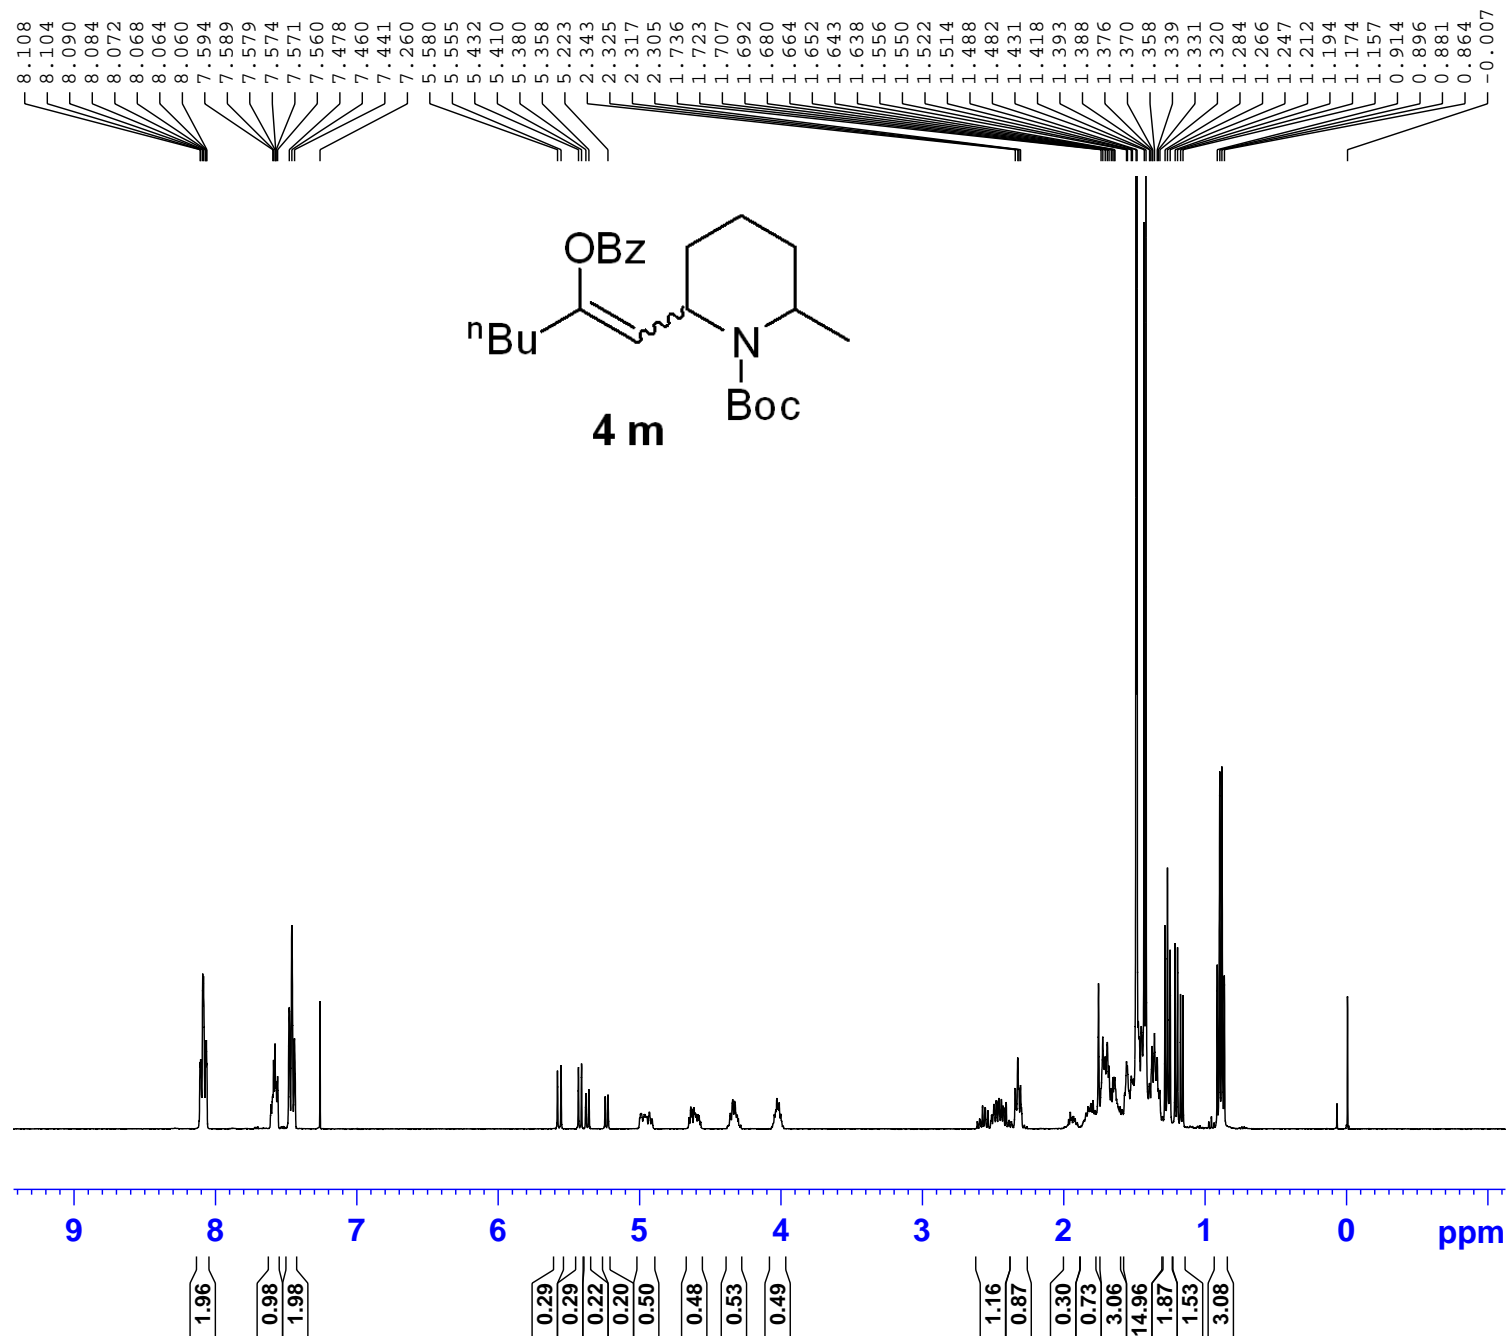

Current Data Parameters  
 NAME Sep14-2009 HJF 4-704  
 EXPNO 11  
 PROCNO 1

F2 - Acquisition Parameters  
 Date\_ 20090915  
 Time 2.11  
 INSTRUM spect  
 PROBHD 5 mm PABBO BB-  
 PULPROG zg30  
 TD 65536  
 SOLVENT CDCl3  
 NS 16  
 DS 0  
 SWH 8223.685 Hz  
 FIDRES 0.125483 Hz  
 AQ 3.9846387 sec  
 RG 90.5  
 DW 60.800 usec  
 DE 6.50 usec  
 TE 295.7 K  
 D1 1.00000000 sec  
 TD0 1

==== CHANNEL f1 =====  
 NUC1 1H  
 P1 12.00 usec  
 PL1 -2.00 dB  
 SFO1 400.1324710 MHz

F2 - Processing parameters  
 SI 32768  
 SF 400.130094 MHz  
 WDW GM  
 SSB 0  
 LB -0.20 Hz  
 GB 0.1  
 PC 1.00

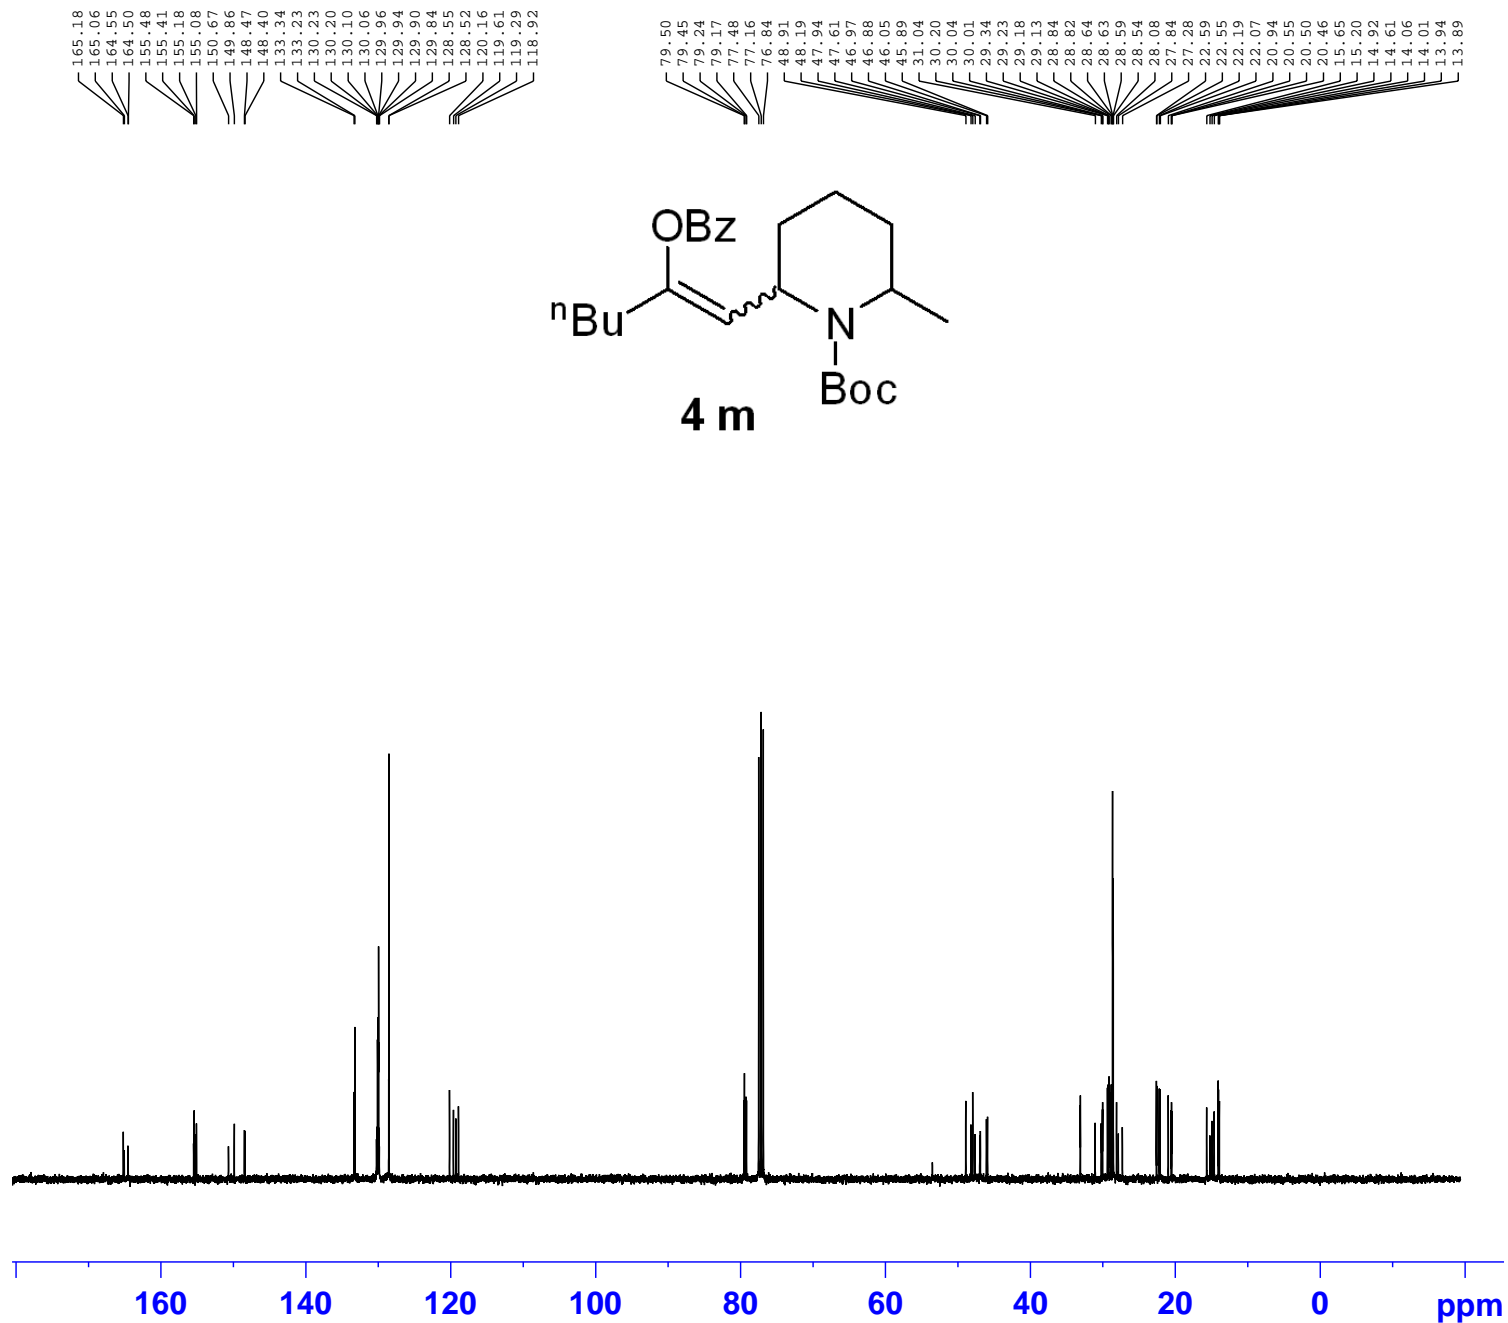

Current Data Parameters  
 NAME Nov25-2009 HJF 4-704  
 EXPNO 8  
 PROCNO 1

F2 - Acquisition Parameters  
 Date\_ 20091125  
 Time 20.41  
 INSTRUM spect  
 PROBHD 5 mm PABBO BB-  
 PULPROG zgpg30  
 TD 65536  
 SOLVENT CDCl3  
 NS 256  
 DS 0  
 SWH 24038.461 Hz  
 FIDRES 0.366798 Hz  
 AQ 1.3631988 sec  
 RG 2050  
 DW 20.800 usec  
 DE 6.50 usec  
 TE 297.8 K  
 D1 2.00000000 sec  
 d11 0.03000000 sec  
 DELTA 1.89999998 sec  
 TD0 1

==== CHANNEL f1 =====  
 NUC1 13C  
 P1 15.50 usec  
 PL1 -1.00 dB  
 SFO1 100.6228298 MHz

==== CHANNEL f2 =====  
 CPDPRG2 waltz16  
 NUC2 1H  
 PCPD2 60.00 usec  
 PL12 11.35 dB  
 PL13 13.05 dB  
 PL2 -2.00 dB  
 SFO2 400.1316005 MHz

F2 - Processing parameters  
 SI 32768  
 SF 100.6127598 MHz  
 WDW EM  
 SSB 0  
 LB 0.60 Hz  
 GB 0  
 PC 1.40



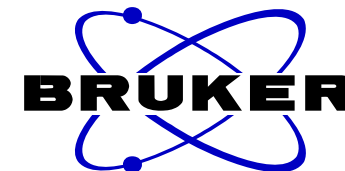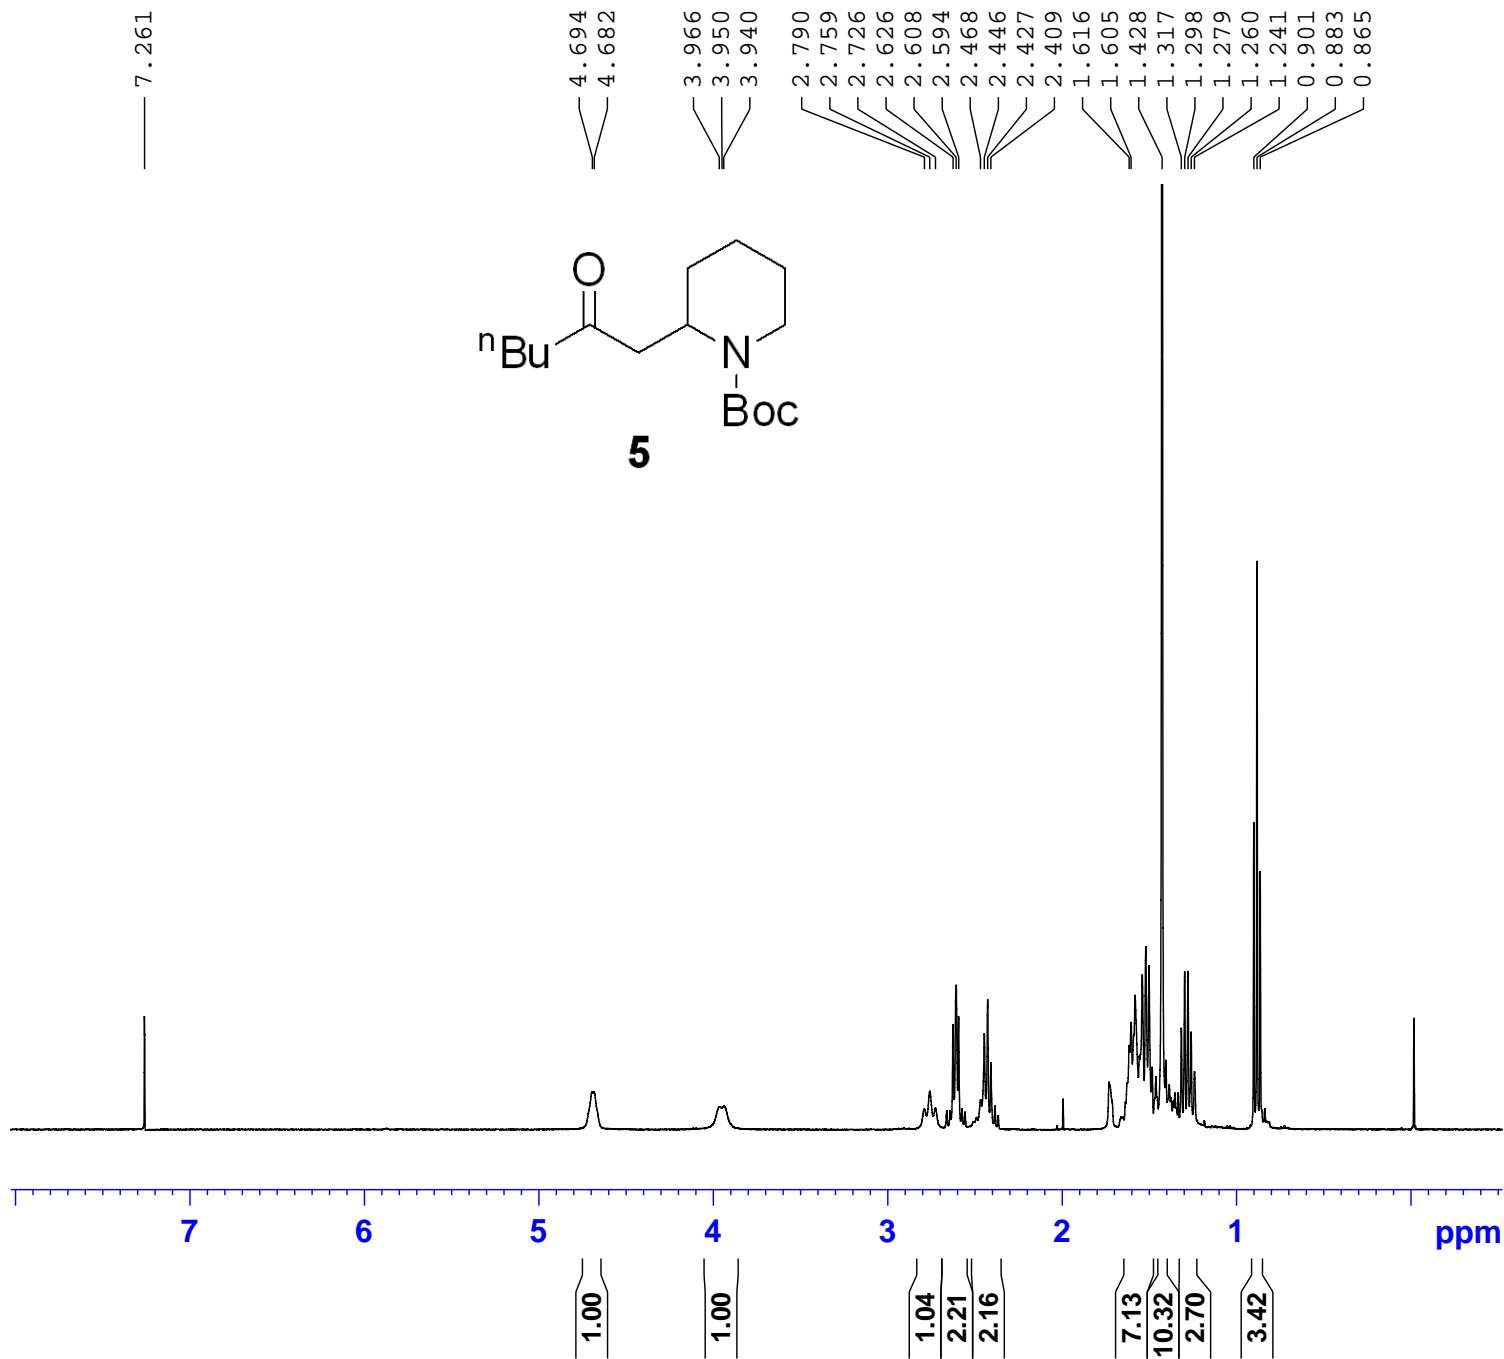

Current Data Parameters  
 NAME Sep21-2009 3-179  
 EXPNO 3  
 PROCNO 1

F2 - Acquisition Parameters  
 Date\_ 20090922  
 Time 1.28  
 INSTRUM spect  
 PROBHD 5 mm PABBO BB-  
 PULPROG zg30  
 TD 65536  
 SOLVENT CDC13  
 NS 16  
 DS 0  
 SWH 8223.685 Hz  
 FIDRES 0.125483 Hz  
 AQ 3.9846387 sec  
 RG 101  
 DW 60.800 usec  
 DE 6.50 usec  
 TE 296.6 K  
 D1 1.00000000 sec  
 TD0 1

===== CHANNEL f1 =====  
 NUC1 1H  
 P1 12.00 usec  
 PL1 -2.00 dB  
 SFO1 400.1324710 MHz

F2 - Processing parameters  
 SI 32768  
 SF 400.1300096 MHz  
 WDW GM  
 SSB 0  
 LB -0.20 Hz  
 GB 0.8  
 PC 1.00

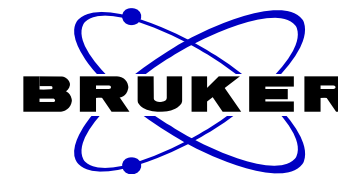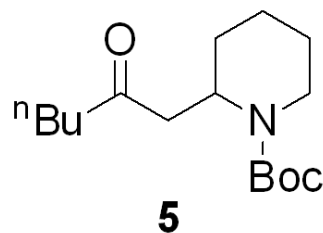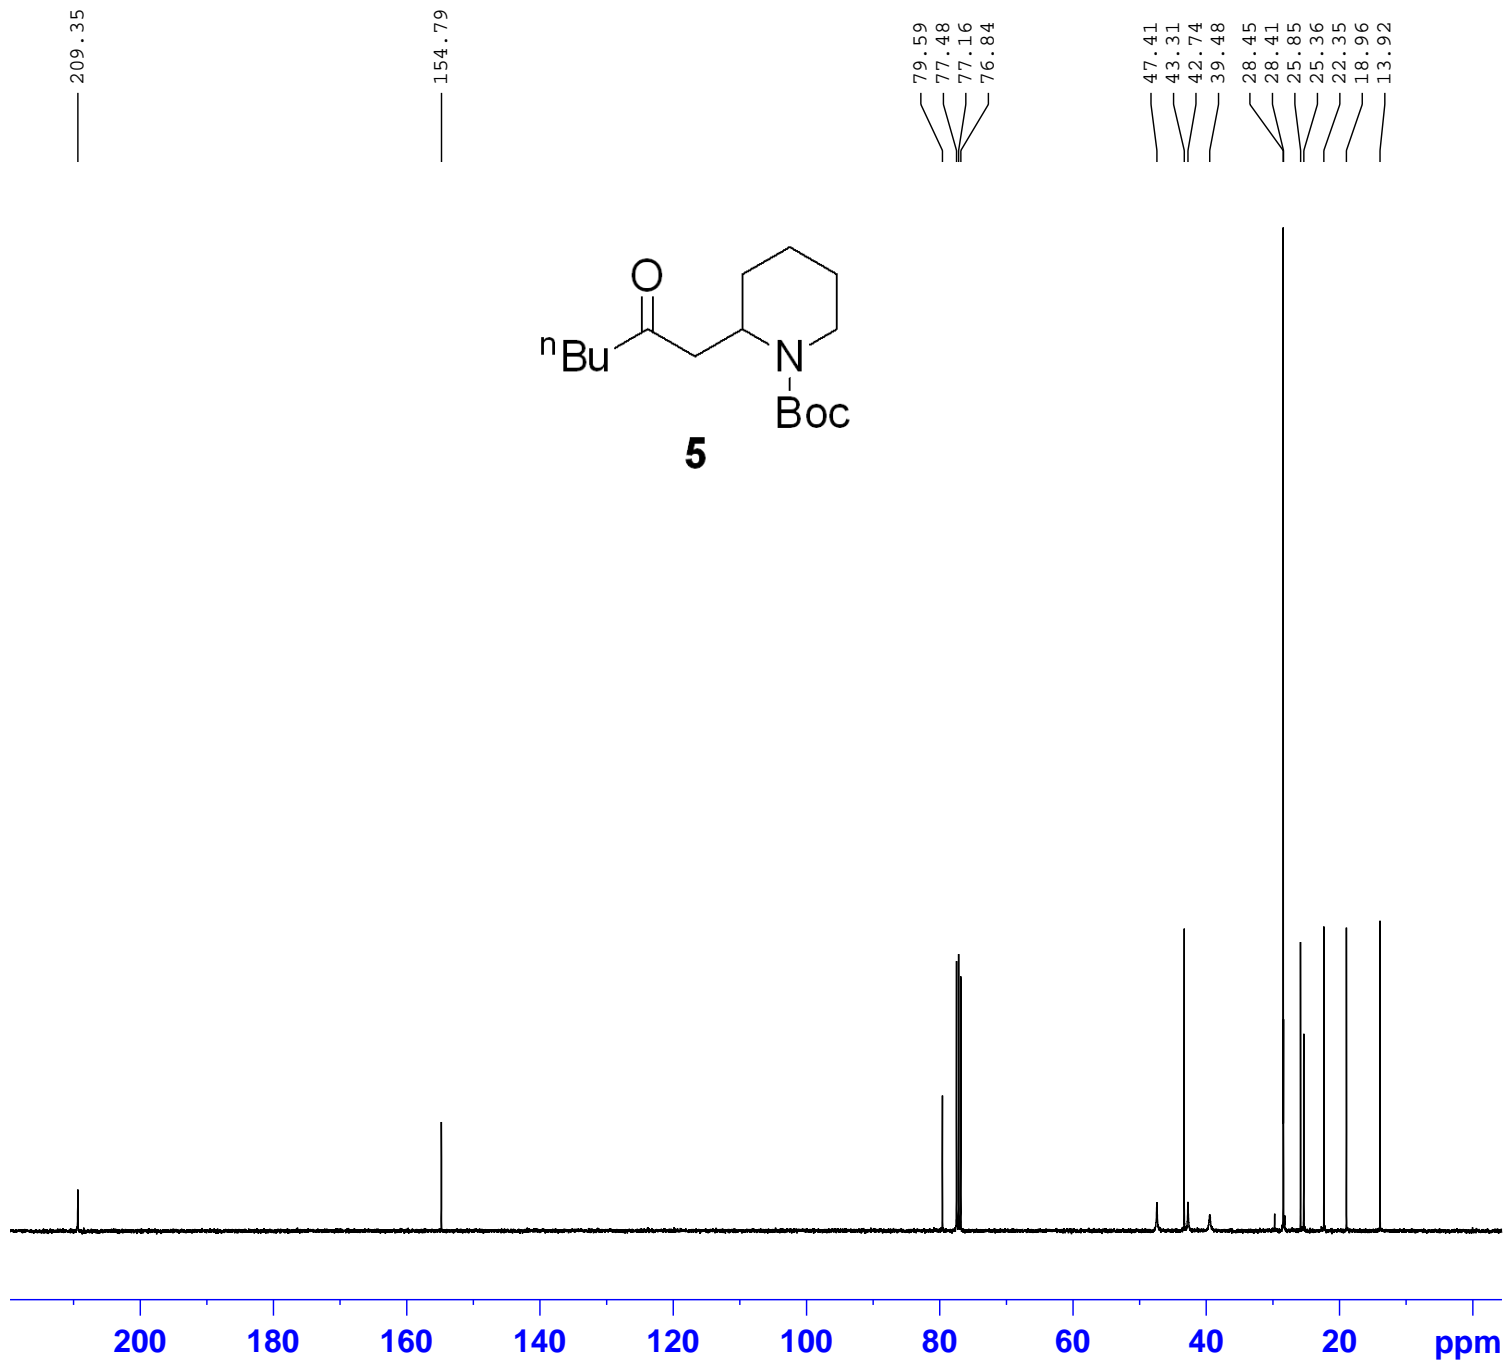

Current Data Parameters  
NAME 2009-09-30 HJF-3-179  
EXPNO 2  
PROCNO 1

F2 - Acquisition Parameters  
Date\_ 20090930  
Time 19.06  
INSTRUM spect  
PROBHD 5 mm PABBO BB-  
PULPROG zgpg30  
TD 65536  
SOLVENT CDC13  
NS 512  
DS 0  
SWH 24038.461 Hz  
FIDRES 0.366798 Hz  
AQ 1.3631988 sec  
RG 181  
DW 20.800 usec  
DE 6.50 usec  
TE 297.9 K  
D1 2.0000000 sec  
d11 0.0300000 sec  
DELTA 1.89999998 sec  
TD0 1

==== CHANNEL f1 =====  
NUC1 13C  
P1 15.50 usec  
PL1 -1.00 dB  
SFO1 100.6228298 MHz

==== CHANNEL f2 =====  
CPDPRG2 waltz16  
NUC2 1H  
PCPD2 60.00 usec  
PL12 11.35 dB  
PL13 13.05 dB  
PL2 -2.00 dB  
SFO2 400.1316005 MHz

F2 - Processing parameters  
SI 32768  
SF 100.6127597 MHz  
WDW EM  
SSB 0  
LB 0.60 Hz  
GB 0  
PC 1.40

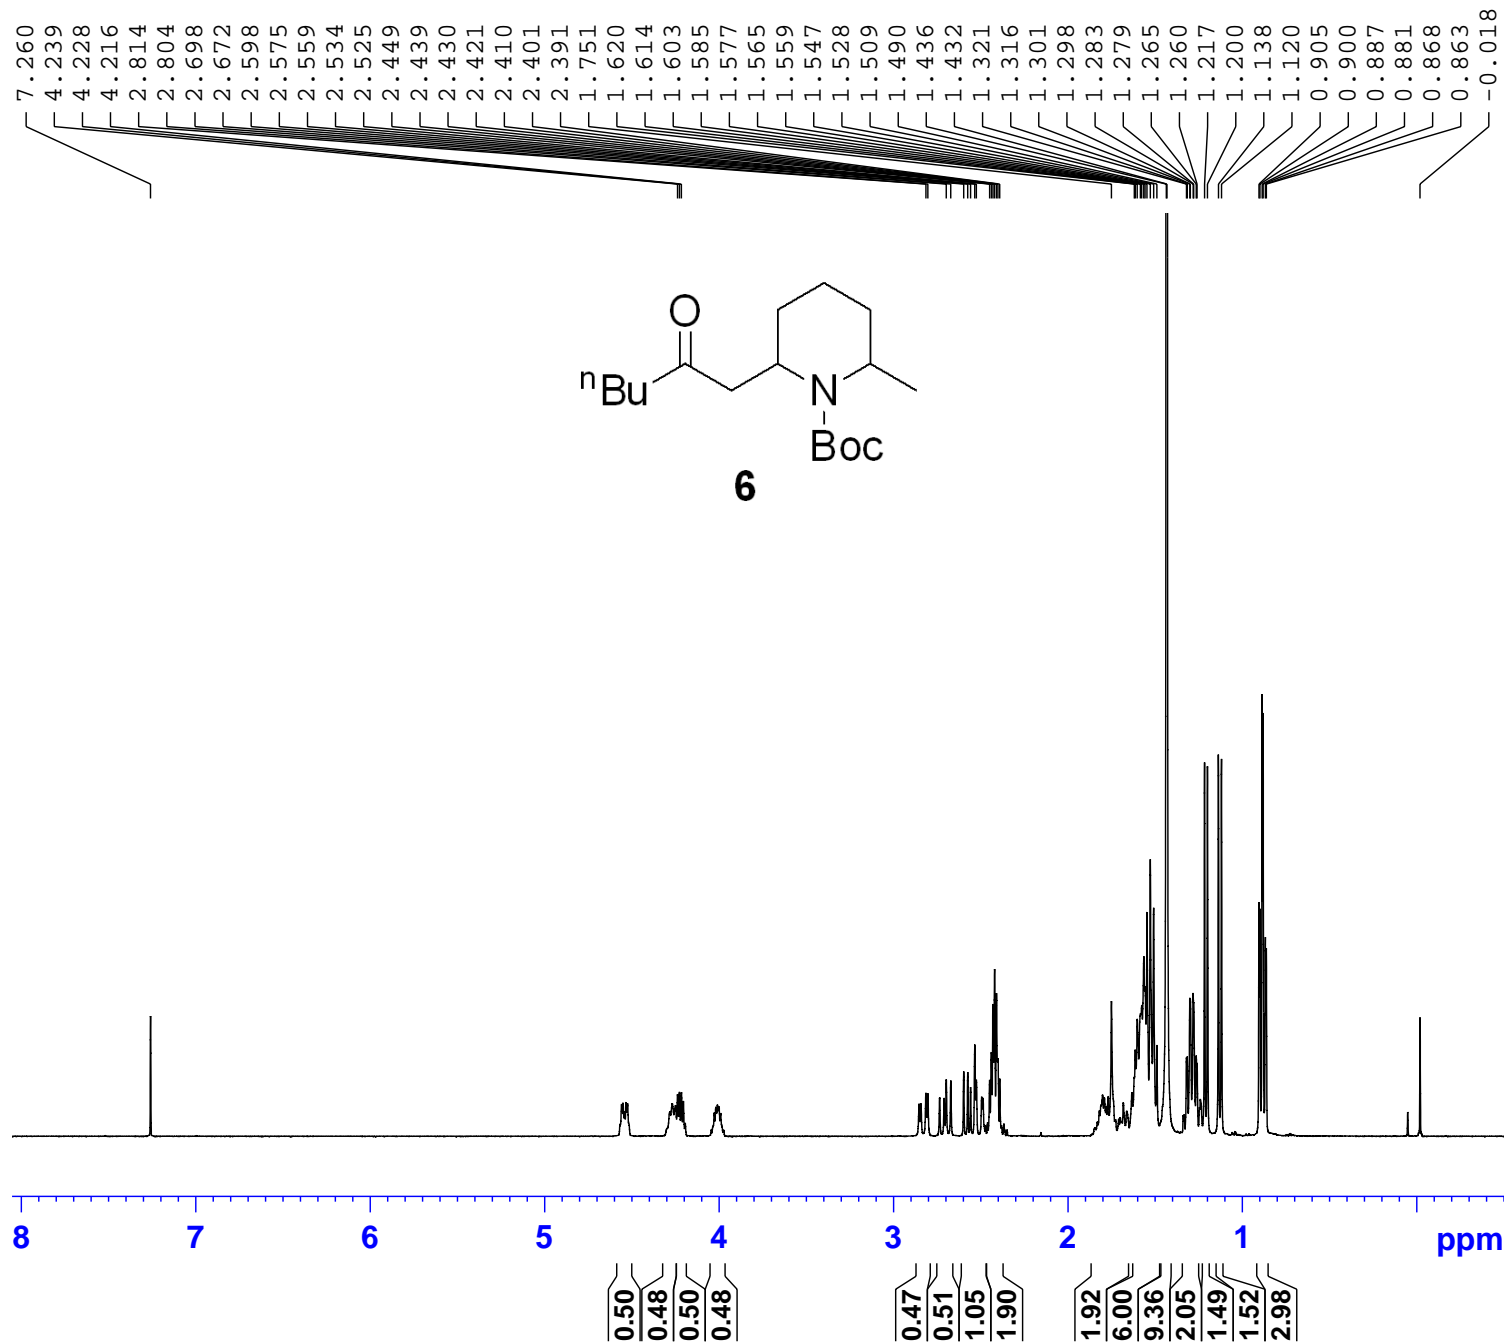

Current Data Parameters  
NAME Sep23-2009 HJF 4-20  
EXPNO 4  
PROCNO 1

F2 - Acquisition Parameters  
Date\_ 20090924  
Time 1.38  
INSTRUM spect  
PROBHD 5 mm PABBO BB-  
PULPROG zg30  
TD 65536  
SOLVENT CDCl3  
NS 16  
DS 0  
SWH 8223.685 Hz  
FIDRES 0.125483 Hz  
AQ 3.9846387 sec  
RG 90.5  
DW 60.800 usec  
DE 6.50 usec  
TE 296.2 K  
D1 1.00000000 sec  
TD0 1

==== CHANNEL f1 =====  
NUC1 1H  
P1 12.00 usec  
PL1 -2.00 dB  
SFO1 400.1324710 MHz

F2 - Processing parameters  
SI 32768  
SF 400.130095 MHz  
WDW GM  
SSB 0  
LB -0.20 Hz  
GB 0.1  
PC 1.00

209.45  
209.28

155.04  
154.92

79.39  
79.22  
77.34  
77.02  
76.70  
47.62  
47.58  
47.49  
47.44  
46.20  
45.57  
42.67  
42.58  
29.90  
28.50  
28.46  
27.91  
27.04  
25.87  
25.83  
24.95  
22.29  
20.28  
20.13  
14.11  
13.81  
13.71

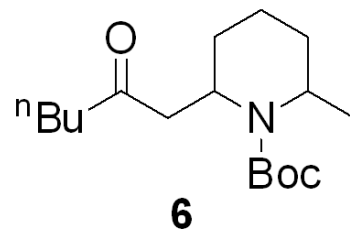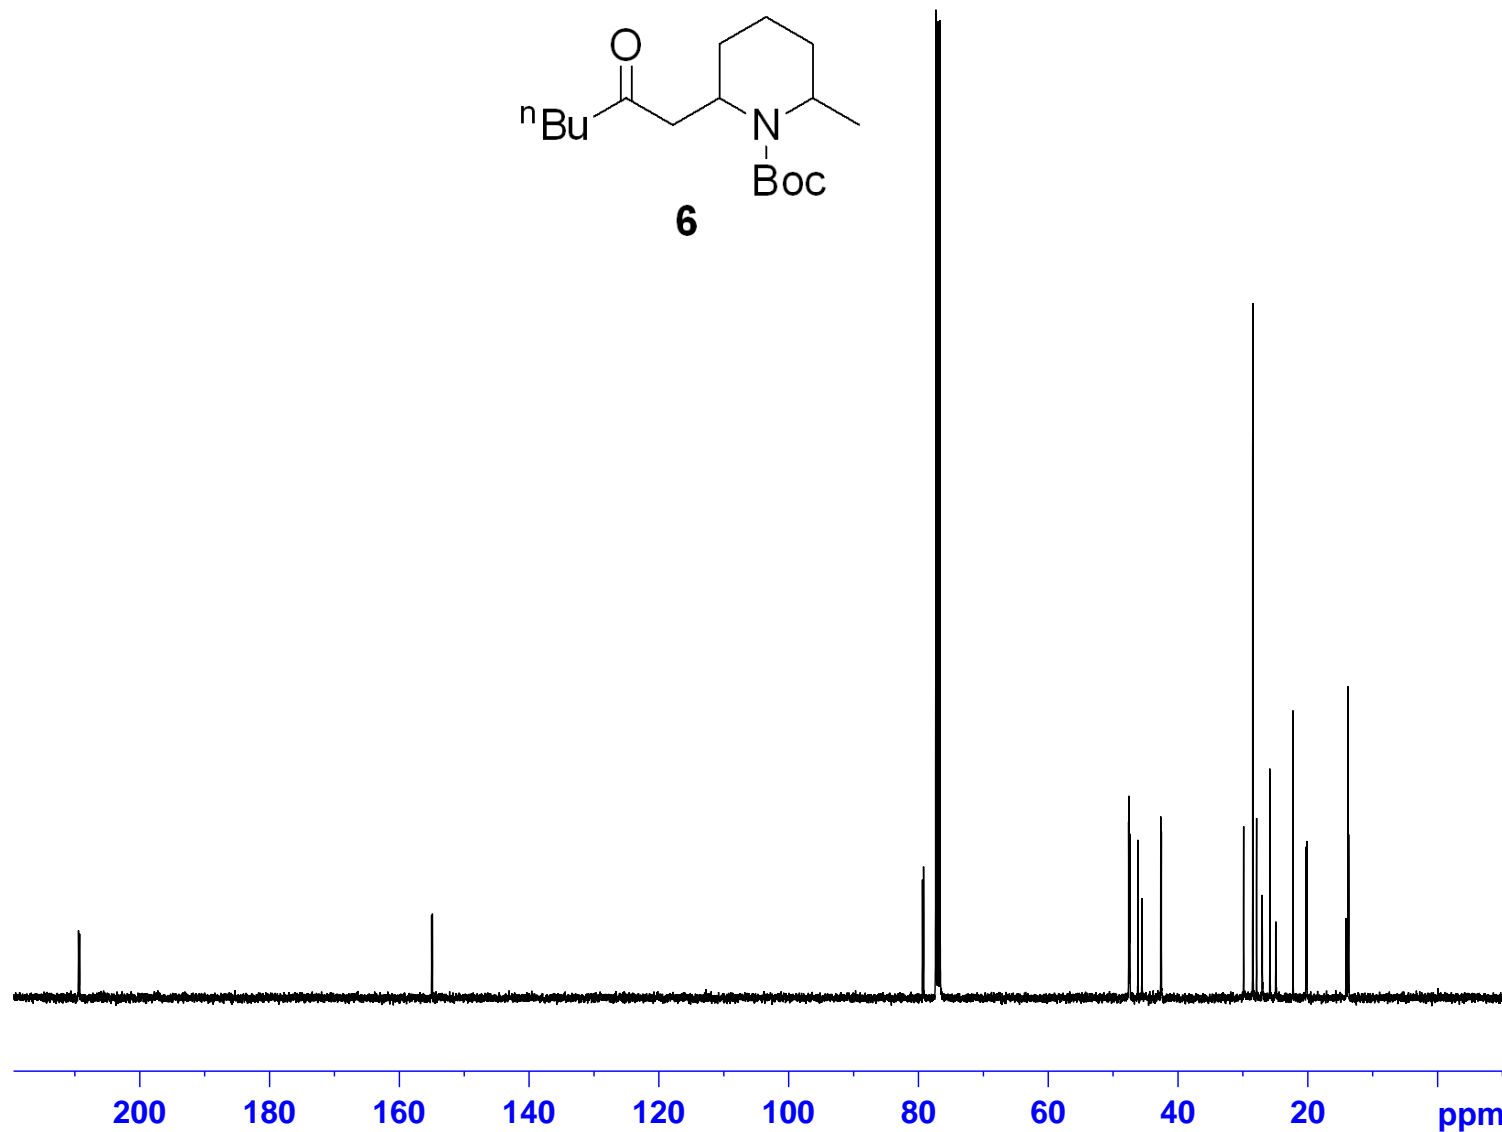

Current Data Parameters  
NAME 2009-10-13 HJF-4-20  
EXPNO 2  
PROCNO 1

F2 - Acquisition Parameters  
Date\_ 20091014  
Time 0.28  
INSTRUM spect  
PROBHD 5 mm PABBO BB-  
PULPROG zgpg30  
TD 65536  
SOLVENT CDCl3  
NS 512  
DS 0  
SWH 24038.461 Hz  
FIDRES 0.366798 Hz  
AQ 1.3631988 sec  
RG 181  
DW 20.800 usec  
DE 6.50 usec  
TE 299.6 K  
D1 2.00000000 sec  
d11 0.03000000 sec  
DELTA 1.89999998 sec  
TD0 1

==== CHANNEL f1 =====  
NUC1 13C  
P1 15.50 usec  
PL1 -1.00 dB  
SFO1 100.6228298 MHz

==== CHANNEL f2 =====  
CPDPRG2 waltz16  
NUC2 1H  
PCPD2 60.00 usec  
PL12 11.35 dB  
PL13 13.05 dB  
PL2 -2.00 dB  
SFO2 400.1316005 MHz

F2 - Processing parameters  
SI 32768  
SF 100.6127690 MHz  
WDW EM  
SSB 0  
LB 1.00 Hz  
GB 0  
PC 1.40
